# Supplementary material for: Transcriptional and Proteomic Choreography Under Phosphorus Deficiency and Re-supply in the N2 Fixing Cyanobacterium Trichodesmium erythraeum
Source: Front Microbiol. 2019 Mar 5;10:330. doi: 10.3389/fmicb.2019.00330 (PMC6411698; doi:10.3389/fmicb.2019.00330)
Supplement: Supplementary file 2 [file Data_Sheet_1.xlsx]

## Sheet: README
Supplemental Data Set. Protein spectral counts for all time points and treatments, as well as expected counts for all transcriptome read mapping. Significance is indicated by color, where green is upregulated under -P and red is downregulated under -P. Analyses are for -P (t = 0 h) compared to +P (t = 0 h), -P (t = X h) compared to RF (t = X h), and +P (t = 0 h) compared to - P (t = 24 h).

## Sheet: Proteome t=0
Annotation	Uniprot ID	+PA	+PB	+PC	-PA	-PB	-PC	-PD	-PE	-PF
Gas vesicle protein GvpN OS=Trichodesmium erythraeum (strain IMS101) GN=Tery_2329 PE=4 SV=1	Q112M3	0	0	0	2	4	3	3	1	4
Keratin, type I cuticular Ha8 OS=Homo sapiens GN=KRT38 PE=2 SV=3	O76015	0	0	2	4	4	6	0	0	0
Na-Ca exchanger/integrin-beta4 OS=Trichodesmium erythraeum (strain IMS101) GN=Tery_4498 PE=4 SV=1	Q10W90	0	0	6	11	11	9	0	13	8
Nitrogenase cofactor biosynthesis protein NifB OS=Trichodesmium erythraeum (strain IMS101) GN=Tery_4133 PE=4 SV=1	Q10X83	11	11	4	19	25	31	17	23	26
Peptidase-like OS=Trichodesmium erythraeum (strain IMS101) GN=Tery_1891 PE=4 SV=1	Q114C7	165	185	146	273	271	280	268	274	280
Peptidase-like OS=Trichodesmium erythraeum (strain IMS101) GN=Tery_1974 PE=4 SV=1	Q113U9	107	116	94	177	175	175	178	174	181
Putative signal transduction protein with Nacht domain OS=Trichodesmium erythraeum (strain IMS101) GN=Tery_2496 PE=4 SV=1	Q111X1	4	0	3	3	10	9	8	11	2
Ribulose bisphosphate carboxylase large chain OS=Trichodesmium erythraeum (strain IMS101) GN=cbbL PE=3 SV=1	Q10WH6	398	398	375	494	448	488	442	583	416
Uncharacterized protein OS=Trichodesmium erythraeum (strain IMS101) GN=Tery_1090 PE=4 SV=1	Q116W8	29	33	29	48	48	42	33	49	46
10 kDa chaperonin OS=Trichodesmium erythraeum (strain IMS101) GN=groS PE=3 SV=1	Q10WQ5	80	77	60	106	90	88	86	90	102
3-dehydroquinate synthase OS=Trichodesmium erythraeum (strain IMS101) GN=Tery_2977 PE=4 SV=1	Q110D9	2	6	3	5	6	12	10	14	9
4-hydroxybenzoyl-CoA thioesterase OS=Trichodesmium erythraeum (strain IMS101) GN=Tery_4502 PE=4 SV=1	Q10W86	2	5	5	11	8	7	2	8	8
5'-nucleotidase / 3'-nucleotidase / exopolyphosphatase OS=Trichodesmium erythraeum (strain IMS101) GN=Tery_1774 PE=4 SV=1	Q114P0	12	13	12	19	21	20	27	24	19
AAA ATPase, central region OS=Trichodesmium erythraeum (strain IMS101) GN=Tery_1047 PE=4 SV=1	Q117A5	73	83	75	94	89	83	71	92	74
Acetylornithine aminotransferase OS=Trichodesmium erythraeum (strain IMS101) GN=argD PE=3 SV=1	Q111I1	19	15	13	23	19	24	20	22	22
Adenosylhomocysteinase OS=Trichodesmium erythraeum (strain IMS101) GN=ahcY PE=3 SV=1	Q111K6	50	64	55	88	109	111	104	115	109
Adenylyl-sulfate kinase OS=Trichodesmium erythraeum (strain IMS101) GN=cysC PE=3 SV=1	Q113Z6	15	22	16	26	24	28	21	25	23
Aldehyde dehydrogenase (Acceptor) OS=Trichodesmium erythraeum (strain IMS101) GN=Tery_2599 PE=3 SV=1	Q111M9	42	54	35	74	85	91	86	89	87
Alkyl hydroperoxide reductase/ Thiol specific antioxidant/ Mal allergen OS=Trichodesmium erythraeum (strain IMS101) GN=Tery_0235 PE=4 SV=1	Q119V1	0	1	0	4	4	5	2	5	2
Alpha-glucosidase OS=Trichodesmium erythraeum (strain IMS101) GN=Tery_4624 PE=3 SV=1	Q10VX8	13	22	11	25	24	21	23	33	24
Alpha/beta hydrolase fold OS=Trichodesmium erythraeum (strain IMS101) GN=Tery_4162 PE=4 SV=1	Q10X56	0	3	0	4	5	4	3	4	4
AMP-dependent synthetase and ligase OS=Trichodesmium erythraeum (strain IMS101) GN=Tery_3820 PE=4 SV=1	Q10Y10	0	1	0	2	6	7	5	6	6
ATP synthase gamma chain OS=Trichodesmium erythraeum (strain IMS101) GN=atpG PE=3 SV=1	Q112Z7	105	117	96	126	126	112	109	116	113
ATP synthase subunit a OS=Trichodesmium erythraeum (strain IMS101) GN=atpB PE=3 SV=1	Q112Z1	0	0	0	0	0	6	0	0	0
ATPase AAA-2 OS=Trichodesmium erythraeum (strain IMS101) GN=Tery_3380 PE=3 SV=1	Q10Z43	50	58	50	64	59	70	62	67	65
Band 7 protein OS=Trichodesmium erythraeum (strain IMS101) GN=Tery_0314 PE=4 SV=1	Q119N4	50	52	45	58	69	59	45	62	55
Beta-ketoacyl synthase OS=Trichodesmium erythraeum (strain IMS101) GN=Tery_3819 PE=4 SV=1	Q10Y11	43	73	48	81	106	95	57	107	93
Beta-ketoacyl synthase OS=Trichodesmium erythraeum (strain IMS101) GN=Tery_3821 PE=4 SV=1	Q10Y09	7	14	10	15	18	18	8	19	23
Beta-ketoacyl synthase OS=Trichodesmium erythraeum (strain IMS101) GN=Tery_3822 PE=4 SV=1	Q10Y08	0	2	0	2	3	6	3	3	3
Beta-lactamase-like OS=Trichodesmium erythraeum (strain IMS101) GN=Tery_4637 PE=4 SV=1	Q10VW5	0	0	0	3	3	2	0	0	0
Biopolymer transport protein ExbD/TolR OS=Trichodesmium erythraeum (strain IMS101) GN=Tery_4449 PE=3 SV=1	Q10WD8	0	0	0	0	3	2	0	1	2
Caffeoyl-CoA O-methyltransferase OS=Trichodesmium erythraeum (strain IMS101) GN=Tery_2976 PE=4 SV=1	Q110E0	4	8	2	12	15	20	20	19	19
Carbohydrate-selective porin OprB OS=Trichodesmium erythraeum (strain IMS101) GN=Tery_1234 PE=3 SV=1	Q116J0	68	54	65	83	74	90	49	74	77
Carbohydrate-selective porin OprB OS=Trichodesmium erythraeum (strain IMS101) GN=Tery_4466 PE=3 SV=1	Q10WC1	140	142	131	156	161	160	149	163	153
Chorismate mutase AroH OS=Trichodesmium erythraeum (strain IMS101) GN=Tery_2493 PE=4 SV=1	Q111X4	0	0	0	1	0	4	0	2	0
Chromosome segregation ATPase-like protein OS=Trichodesmium erythraeum (strain IMS101) GN=Tery_1497 PE=4 SV=1	Q115P0	19	21	20	26	28	26	12	28	27
Cyclic nucleotide-regulated ABC bacteriocin/lantibiotic exporters OS=Trichodesmium erythraeum (strain IMS101) GN=Tery_1352 PE=4 SV=1	Q116A9	1	0	1	4	4	4	0	3	1
Deoxyuridine 5'-triphosphate nucleotidohydrolase OS=Trichodesmium erythraeum (strain IMS101) GN=dut PE=3 SV=1	Q113K0	0	5	0	4	5	4	0	4	5
Diaminopimelate decarboxylase OS=Trichodesmium erythraeum (strain IMS101) GN=lysA PE=3 SV=1	Q112C4	16	16	16	23	24	28	17	26	21
Dimethylaniline monooxygenase (N-oxide forming) OS=Trichodesmium erythraeum (strain IMS101) GN=Tery_3826 PE=4 SV=1	Q10Y04	15	30	16	34	42	40	28	42	43
Flavodoxin OS=Trichodesmium erythraeum (strain IMS101) GN=fld PE=3 SV=2	O52659	256	327	198	311	318	278	286	321	277
Fructose-1,6-bisphosphatase class 1 OS=Trichodesmium erythraeum (strain IMS101) GN=fbp PE=3 SV=1	Q118F5	10	14	5	20	26	25	24	26	23
Fructose-bisphosphate aldolase OS=Trichodesmium erythraeum (strain IMS101) GN=Tery_1687 PE=4 SV=1	Q114W6	139	196	144	258	233	229	237	274	233
GCN5-related N-acetyltransferase OS=Trichodesmium erythraeum (strain IMS101) GN=Tery_4425 PE=4 SV=1	Q10WG1	2	2	2	4	6	6	2	5	6
Glycerophosphoryl diester phosphodiesterase OS=Trichodesmium erythraeum (strain IMS101) GN=Tery_2777 PE=4 SV=1	Q110W5	13	17	15	22	23	26	18	24	22
GTP-binding protein TypA OS=Trichodesmium erythraeum (strain IMS101) GN=Tery_4442 PE=4 SV=1	Q10WE5	22	25	25	32	36	28	27	37	31
HAD superfamily (Subfamily IA) hydrolase, TIGR01548 OS=Trichodesmium erythraeum (strain IMS101) GN=Tery_3452 PE=4 SV=1	Q10YY0	0	0	0	3	0	3	2	2	4
HAD-superfamily hydrolase, subfamily IA, variant 3 OS=Trichodesmium erythraeum (strain IMS101) GN=Tery_0409 PE=4 SV=1	Q119F1	8	9	10	13	13	18	8	12	13
Heme oxygenase (Decyclizing) OS=Trichodesmium erythraeum (strain IMS101) GN=Tery_0335 PE=4 SV=1	Q119L5	2	5	3	4	9	8	7	7	11
Hemolysin-type calcium-binding region OS=Trichodesmium erythraeum (strain IMS101) GN=Tery_2055 PE=4 SV=1	Q113M8	21	27	22	31	38	33	28	34	26
Hemolysin-type calcium-binding region OS=Trichodesmium erythraeum (strain IMS101) GN=Tery_3467 PE=4 SV=1	Q10YW6	30	31	25	70	73	71	70	74	76
Inositol-1(Or 4)-monophosphatase OS=Trichodesmium erythraeum (strain IMS101) GN=Tery_0756 PE=4 SV=1	Q117Z0	5	7	8	9	12	13	9	17	9
Integrin, beta chain-like OS=Trichodesmium erythraeum (strain IMS101) GN=Tery_1890 PE=4 SV=1	Q114C8	1	4	3	8	9	9	6	10	11
Keratin, type I cytoskeletal 10 OS=Homo sapiens GN=KRT10 PE=1 SV=6	P13645	27	54	19	46	31	61	15	28	33
Keratin, type II cytoskeletal 1 OS=Homo sapiens GN=KRT1 PE=1 SV=6	P04264	23	53	20	49	25	71	19	26	21
KpsF/GutQ family protein OS=Trichodesmium erythraeum (strain IMS101) GN=Tery_3105 PE=3 SV=1	Q10ZT6	2	3	0	5	6	5	0	5	4
L-threonine synthase OS=Trichodesmium erythraeum (strain IMS101) GN=Tery_4348 PE=4 SV=1	Q10WN4	0	0	0	0	3	2	0	0	2
Light-independent protochlorophyllide reductase iron-sulfur ATP-binding protein OS=Trichodesmium erythraeum (strain IMS101) GN=chlL PE=3 SV=1	Q115L1	0	0	0	2	3	0	0	1	0
Lysozyme OS=Trichodesmium erythraeum (strain IMS101) GN=Tery_4180 PE=3 SV=1	Q10X39	28	36	28	40	43	41	26	51	39
Methyltransferase type 12 OS=Trichodesmium erythraeum (strain IMS101) GN=Tery_1776 PE=4 SV=1	Q114N9	1	3	5	5	9	10	8	11	14
MoaD family protein OS=Trichodesmium erythraeum (strain IMS101) GN=Tery_4349 PE=4 SV=1	Q10WN3	25	24	20	30	34	28	25	30	29
Molybdopterin molybdochelatase OS=Trichodesmium erythraeum (strain IMS101) GN=Tery_0767 PE=4 SV=1	REVERSE_Q117Y0	0	0	0	3	2	0	0	0	4
Na-Ca exchanger/integrin-beta4 OS=Trichodesmium erythraeum (strain IMS101) GN=Tery_4754 PE=4 SV=1	Q10VL5	5	5	7	12	5	13	2	3	5
Nitrogen regulatory protein P-II OS=Trichodesmium erythraeum (strain IMS101) GN=Tery_2842 PE=3 SV=1	Q110Q8	55	59	50	77	68	70	61	70	72
Nitrogenase iron protein OS=Trichodesmium erythraeum (strain IMS101) GN=nifH PE=3 SV=1	O34106	110	133	95	145	141	184	156	160	135
OmpA/MotB OS=Trichodesmium erythraeum (strain IMS101) GN=Tery_3734 PE=3 SV=1	Q10Y84	18	22	17	33	28	28	22	30	29
Oxidoreductase alpha (Molybdopterin) subunit OS=Trichodesmium erythraeum (strain IMS101) GN=Tery_0404 PE=3 SV=1	Q119F5	0	2	0	0	8	4	0	7	0
Oxygen-dependent coproporphyrinogen-III oxidase OS=Trichodesmium erythraeum (strain IMS101) GN=hemF PE=3 SV=1	Q116P7	6	8	5	12	12	8	13	15	12
PBS lyase HEAT-like repeat OS=Trichodesmium erythraeum (strain IMS101) GN=Tery_0995 PE=4 SV=1	Q117F1	0	0	0	3	3	2	0	2	1
Peptidase S8 and S53, subtilisin, kexin, sedolisin OS=Trichodesmium erythraeum (strain IMS101) GN=Tery_0117 PE=3 SV=1	Q11A60	0	1	0	3	2	3	0	2	1
Peptidase-like OS=Trichodesmium erythraeum (strain IMS101) GN=Tery_0783 PE=4 SV=1	Q117X1	16	18	18	27	21	25	18	25	14
Peptidase-like OS=Trichodesmium erythraeum (strain IMS101) GN=Tery_1892 PE=4 SV=1	Q114C6	139	160	128	193	202	199	177	214	185
Peptidylprolyl isomerase OS=Trichodesmium erythraeum (strain IMS101) GN=Tery_3559 PE=4 SV=1	Q10YN0	16	24	21	32	34	36	33	36	33
Periplasmic protein TonB links inner and outer membranes-like OS=Trichodesmium erythraeum (strain IMS101) GN=Tery_2593 PE=4 SV=1	Q111N4	36	34	28	45	39	48	26	44	40
Phage Tail Collar OS=Trichodesmium erythraeum (strain IMS101) GN=Tery_1091 PE=4 SV=1	Q116W7	60	67	63	84	76	78	68	79	79
Phosphate import ATP-binding protein PstB OS=Trichodesmium erythraeum (strain IMS101) GN=pstB PE=3 SV=1	Q10YP7	0	0	0	14	13	13	10	14	16
Phosphate-binding protein OS=Trichodesmium erythraeum (strain IMS101) GN=Tery_3534 PE=3 SV=1	Q10YQ2	14	15	13	34	36	41	36	38	41
Phosphonate ABC transporter, periplasmic phosphonate-binding protein OS=Trichodesmium erythraeum (strain IMS101) GN=Tery_4993 PE=4 SV=1	Q10V17	14	19	13	36	34	32	33	37	36
Phosphonate metabolism protein PhnM OS=Trichodesmium erythraeum (strain IMS101) GN=Tery_5003 PE=4 SV=1	Q10V07	0	0	0	0	2	3	0	2	0
Phosphoribulokinase OS=Trichodesmium erythraeum (strain IMS101) GN=Tery_3654 PE=4 SV=1	Q10YF7	36	40	41	46	47	59	49	51	48
Photosystem antenna protein-like OS=Trichodesmium erythraeum (strain IMS101) GN=Tery_1667 PE=4 SV=1	Q114Y6	55	93	56	98	97	89	72	98	74
Photosystem antenna protein-like OS=Trichodesmium erythraeum (strain IMS101) GN=Tery_2483 PE=4 SV=1	Q111Y3	26	41	29	55	56	58	31	61	44
Photosystem antenna protein-like OS=Trichodesmium erythraeum (strain IMS101) GN=Tery_2484 PE=4 SV=1	Q111Y2	37	50	33	56	55	53	43	57	53
Phycobilisome linker polypeptide OS=Trichodesmium erythraeum (strain IMS101) GN=Tery_2486 PE=3 SV=1	Q111Y0	22	27	14	30	33	32	26	33	31
Phycobilisome protein OS=Trichodesmium erythraeum (strain IMS101) GN=Tery_0983 PE=3 SV=1	Q117G1	400	374	344	435	387	452	344	413	360
Phycobilisome protein OS=Trichodesmium erythraeum (strain IMS101) GN=Tery_4799 PE=3 SV=1	Q10VH4	35	31	33	40	43	45	35	37	42
Phytanoyl-CoA dioxygenase OS=Trichodesmium erythraeum (strain IMS101) GN=Tery_3102 PE=4 SV=1	Q10ZT9	4	3	2	5	8	4	4	5	6
Putative signal transduction protein with Nacht domain OS=Trichodesmium erythraeum (strain IMS101) GN=Tery_2632 PE=4 SV=1	Q111J7	1	5	0	3	7	7	0	9	2
Putative signal transduction protein with Nacht domain OS=Trichodesmium erythraeum (strain IMS101) GN=Tery_3571 PE=4 SV=1	Q10YL9	1	6	3	3	9	8	7	9	2
Redoxin OS=Trichodesmium erythraeum (strain IMS101) GN=Tery_0234 PE=4 SV=1	Q119V2	0	0	0	2	3	3	2	2	3
Ribonuclease J OS=Trichodesmium erythraeum (strain IMS101) GN=rnj PE=3 SV=1	Q118P1	1	0	0	6	0	5	0	8	0
Ribonuclease, Rne/Rng family OS=Trichodesmium erythraeum (strain IMS101) GN=Tery_0483 PE=4 SV=1	Q118Y5	23	27	20	34	29	29	20	31	30
Ribosome-recycling factor OS=Trichodesmium erythraeum (strain IMS101) GN=frr PE=3 SV=1	Q10Y49	36	35	33	43	42	45	33	34	37
Ribulose 1,5-bisphosphate carboxylase small subunit OS=Trichodesmium erythraeum (strain IMS101) GN=Tery_4408 PE=4 SV=1	Q10WH8	79	82	79	134	119	150	110	132	104
RNA-binding S4 OS=Trichodesmium erythraeum (strain IMS101) GN=Tery_4198 PE=4 SV=1	Q10X22	3	4	2	7	8	6	2	4	5
S-adenosylmethionine synthase OS=Trichodesmium erythraeum (strain IMS101) GN=metK PE=3 SV=1	Q10VU5	34	52	41	54	59	67	58	75	66
Shikimate kinase OS=Trichodesmium erythraeum (strain IMS101) GN=aroK PE=3 SV=1	Q115N2	0	0	0	2	3	2	0	1	0
Short-chain dehydrogenase/reductase SDR OS=Trichodesmium erythraeum (strain IMS101) GN=Tery_0205 PE=3 SV=1	Q119Y0	8	10	6	14	13	11	9	13	11
Stress responsive alpha-beta barrel OS=Trichodesmium erythraeum (strain IMS101) GN=Tery_0681 PE=4 SV=1	Q118F6	0	6	4	5	8	7	6	9	4
Thioredoxin OS=Trichodesmium erythraeum (strain IMS101) GN=Tery_3437 PE=3 SV=1	Q10YZ4	3	0	2	4	6	2	0	2	3
TPR repeat OS=Trichodesmium erythraeum (strain IMS101) GN=Tery_0116 PE=4 SV=1	Q11A61	1	3	2	5	6	6	7	5	6
TPR repeat OS=Trichodesmium erythraeum (strain IMS101) GN=Tery_1499 PE=4 SV=1	Q115N9	5	8	3	13	8	17	5	17	16
Transaldolase OS=Trichodesmium erythraeum (strain IMS101) GN=tal PE=3 SV=1	Q118F4	41	51	54	59	57	65	53	66	65
Transketolase, central region OS=Trichodesmium erythraeum (strain IMS101) GN=Tery_4645 PE=4 SV=1	Q10VV8	17	28	28	34	39	33	31	38	33
Twitching motility protein OS=Trichodesmium erythraeum (strain IMS101) GN=Tery_1747 PE=4 SV=1	Q114R7	2	3	0	4	7	3	0	3	5
UBA/THIF-type NAD/FAD binding fold OS=Trichodesmium erythraeum (strain IMS101) GN=Tery_1108 PE=4 SV=1	Q116V2	35	31	31	40	45	45	35	48	41
UDP-N-acetylglucosamine 1-carboxyvinyltransferase OS=Trichodesmium erythraeum (strain IMS101) GN=murA PE=3 SV=1	Q10ZM1	0	2	0	3	5	3	2	2	4
UDP-sulfoquinovose synthase OS=Trichodesmium erythraeum (strain IMS101) GN=Tery_0398 PE=4 SV=1	Q119G0	20	24	16	24	26	35	27	30	20
Uncharacterized protein OS=Trichodesmium erythraeum (strain IMS101) GN=Tery_0144 PE=4 SV=1	Q11A35	0	0	0	0	0	5	0	0	0
Uncharacterized protein OS=Trichodesmium erythraeum (strain IMS101) GN=Tery_0244 PE=4 SV=1	Q119U4	2	5	1	4	7	8	2	6	6
Uncharacterized protein OS=Trichodesmium erythraeum (strain IMS101) GN=Tery_0600 PE=4 SV=1	Q118N0	282	361	269	552	540	610	463	603	524
Uncharacterized protein OS=Trichodesmium erythraeum (strain IMS101) GN=Tery_1092 PE=4 SV=1	Q116W6	46	47	41	60	55	52	46	56	53
Uncharacterized protein OS=Trichodesmium erythraeum (strain IMS101) GN=Tery_1093 PE=4 SV=1	Q116W5	46	49	42	58	62	55	42	73	55
Uncharacterized protein OS=Trichodesmium erythraeum (strain IMS101) GN=Tery_1146 PE=4 SV=1	Q116R6	4	1	0	0	10	14	9	6	6
Uncharacterized protein OS=Trichodesmium erythraeum (strain IMS101) GN=Tery_1487 PE=4 SV=1	Q115P9	9	6	6	15	17	14	7	9	14
Uncharacterized protein OS=Trichodesmium erythraeum (strain IMS101) GN=Tery_1488 PE=4 SV=1	Q115P8	0	3	0	4	5	3	0	5	2
Uncharacterized protein OS=Trichodesmium erythraeum (strain IMS101) GN=Tery_2326 PE=4 SV=1	Q112M6	0	10	0	19	26	23	15	27	29
Uncharacterized protein OS=Trichodesmium erythraeum (strain IMS101) GN=Tery_2341 PE=4 SV=1	Q112L3	10	13	11	22	24	26	21	39	15
Uncharacterized protein OS=Trichodesmium erythraeum (strain IMS101) GN=Tery_2468 PE=4 SV=1	Q111Z6	0	0	0	5	7	4	3	5	6
Uncharacterized protein OS=Trichodesmium erythraeum (strain IMS101) GN=Tery_3106 PE=4 SV=1	Q10ZT5	2	2	3	6	5	6	3	2	2
Uncharacterized protein OS=Trichodesmium erythraeum (strain IMS101) GN=Tery_3215 PE=4 SV=1	Q10ZJ0	2	1	1	6	4	6	1	3	4
Uncharacterized protein OS=Trichodesmium erythraeum (strain IMS101) GN=Tery_3509 PE=4 SV=1	Q10YS5	44	49	37	46	57	52	53	57	43
Uncharacterized protein OS=Trichodesmium erythraeum (strain IMS101) GN=Tery_3511 PE=4 SV=1	Q10YS3	2	4	2	6	7	5	0	8	4
Uncharacterized protein OS=Trichodesmium erythraeum (strain IMS101) GN=Tery_3825 PE=4 SV=1	Q10Y05	8	19	6	18	30	24	16	18	28
Uncharacterized protein OS=Trichodesmium erythraeum (strain IMS101) GN=Tery_3845 PE=4 SV=1	Q10XY7	1	0	0	30	39	31	28	34	34
Uncharacterized protein OS=Trichodesmium erythraeum (strain IMS101) GN=Tery_3895 PE=4 SV=1	Q10XU4	7	10	5	11	15	10	12	12	13
Uncharacterized protein OS=Trichodesmium erythraeum (strain IMS101) GN=Tery_4083 PE=4 SV=1	Q10XD2	0	0	0	2	2	1	0	2	2
Uncharacterized protein OS=Trichodesmium erythraeum (strain IMS101) GN=Tery_4248 PE=4 SV=1	Q10WX6	1	1	0	3	6	4	2	4	6
Uncharacterized protein OS=Trichodesmium erythraeum (strain IMS101) GN=Tery_4659 PE=4 SV=1	Q10VU6	12	14	14	18	22	25	18	24	23
UPF0182 protein Tery_4385 OS=Trichodesmium erythraeum (strain IMS101) GN=Tery_4385 PE=3 SV=1	Q10WK0	12	15	6	15	24	16	15	21	21
Uracil phosphoribosyltransferase OS=Trichodesmium erythraeum (strain IMS101) GN=Tery_2191 PE=3 SV=1	Q113A3	2	2	0	4	5	3	5	3	3
WD-40 repeat OS=Trichodesmium erythraeum (strain IMS101) GN=Tery_4625 PE=4 SV=1	Q10VX7	2	0	0	5	3	2	0	2	1
Zeta-carotene desaturase / three-step phytoene desaturase OS=Trichodesmium erythraeum (strain IMS101) GN=Tery_4011 PE=4 SV=1	Q10XJ3	0	0	0	4	6	4	0	3	0
Glutamine synthetase OS=Trichodesmium erythraeum (strain IMS101) GN=Tery_3834 PE=3 SV=1	Q10XZ7	268	220	240	196	201	222	188	237	153
Photosystem II protein D1 2 OS=Trichodesmium erythraeum (strain IMS101) GN=psbA3 PE=3 SV=1	Q10VK7	20	19	25	0	0	24	0	25	21
Phycobilisome protein OS=Trichodesmium erythraeum (strain IMS101) GN=Tery_0998 PE=3 SV=1	Q117E8	320	302	329	298	296	274	262	298	272
RNA-binding region RNP-1 OS=Trichodesmium erythraeum (strain IMS101) GN=Tery_4005 PE=4 SV=1	Q10XJ6	82	65	78	55	57	49	37	58	56
3-dehydroquinate synthase OS=Trichodesmium erythraeum (strain IMS101) GN=aroB PE=3 SV=1	Q10V03	6	5	4	3	3	0	0	4	4
30S ribosomal protein S15 OS=Trichodesmium erythraeum (strain IMS101) GN=rpsO PE=3 SV=1	Q11A13	8	5	6	0	4	4	5	5	4
30S ribosomal protein S20 OS=Trichodesmium erythraeum (strain IMS101) GN=rpsT PE=3 SV=1	Q110G9	24	19	23	12	8	8	14	12	13
30S ribosomal protein S21 OS=Trichodesmium erythraeum (strain IMS101) GN=rpsU PE=3 SV=1	Q10VZ7	27	21	23	16	12	9	9	14	15
30S ribosomal protein S9 OS=Trichodesmium erythraeum (strain IMS101) GN=rpsI PE=3 SV=1	Q110D5	35	41	37	25	27	21	22	26	23
33 kDa chaperonin OS=Trichodesmium erythraeum (strain IMS101) GN=hslO PE=3 SV=1	Q112R6	2	4	4	3	0	0	2	2	1
5-methyltetrahydropteroyltriglutamate--homocysteine methyltransferase OS=Trichodesmium erythraeum (strain IMS101) GN=metE PE=3 SV=1	Q117R7	29	26	27	12	14	9	14	13	9
50S ribosomal protein L1 OS=Trichodesmium erythraeum (strain IMS101) GN=rplA PE=3 SV=1	Q119S7	64	56	60	40	35	34	33	43	36
50S ribosomal protein L10 OS=Trichodesmium erythraeum (strain IMS101) GN=rplJ PE=3 SV=1	Q119S8	51	56	53	36	39	31	34	36	32
50S ribosomal protein L11 OS=Trichodesmium erythraeum (strain IMS101) GN=rplK PE=3 SV=1	Q119S6	62	63	71	49	50	42	41	58	50
50S ribosomal protein L13 OS=Trichodesmium erythraeum (strain IMS101) GN=rplM PE=3 SV=1	Q110D4	87	91	91	64	66	56	54	78	66
50S ribosomal protein L15 OS=Trichodesmium erythraeum (strain IMS101) GN=rplO PE=3 SV=1	Q110C4	46	45	47	29	31	27	25	32	28
50S ribosomal protein L2 OS=Trichodesmium erythraeum (strain IMS101) GN=rplB PE=3 SV=1	Q110B0	48	34	45	28	30	33	21	24	20
50S ribosomal protein L20 OS=Trichodesmium erythraeum (strain IMS101) GN=rplT PE=3 SV=1	Q114D6	13	10	17	5	0	6	7	7	7
50S ribosomal protein L21 OS=Trichodesmium erythraeum (strain IMS101) GN=rplU PE=3 SV=1	Q10ZG6	36	38	38	24	24	26	24	31	23
50S ribosomal protein L3 OS=Trichodesmium erythraeum (strain IMS101) GN=rplC PE=3 SV=1	Q110A7	82	75	77	60	59	61	60	60	51
50S ribosomal protein L4 OS=Trichodesmium erythraeum (strain IMS101) GN=rplD PE=3 SV=1	Q110A8	49	49	54	34	44	33	25	45	39
50S ribosomal protein L5 OS=Trichodesmium erythraeum (strain IMS101) GN=rplE PE=3 SV=1	Q110B9	54	52	57	43	47	33	34	50	46
50S ribosomal protein L6 OS=Trichodesmium erythraeum (strain IMS101) GN=rplF PE=3 SV=1	Q110C1	64	64	77	60	56	54	52	57	59
50S ribosomal protein L7/L12 OS=Trichodesmium erythraeum (strain IMS101) GN=rplL PE=3 SV=1	Q119S9	52	46	64	39	36	32	38	35	38
50S ribosomal protein L9 OS=Trichodesmium erythraeum (strain IMS101) GN=rplI PE=3 SV=1	Q115S4	45	43	36	30	29	29	25	30	30
6-phosphogluconate dehydrogenase, decarboxylating OS=Trichodesmium erythraeum (strain IMS101) GN=Tery_1834 PE=3 SV=1	Q114I4	306	298	312	237	232	230	177	252	193
ABC transporter related OS=Trichodesmium erythraeum (strain IMS101) GN=Tery_0331 PE=4 SV=1	Q119L9	4	4	0	0	0	1	0	2	0
Abortive infection protein OS=Trichodesmium erythraeum (strain IMS101) GN=Tery_2182 PE=4 SV=1	Q113B1	5	3	4	0	2	0	0	0	2
Adenine phosphoribosyltransferase OS=Trichodesmium erythraeum (strain IMS101) GN=apt PE=3 SV=1	Q119D0	9	11	10	2	5	4	6	6	7
Adenylosuccinate synthetase OS=Trichodesmium erythraeum (strain IMS101) GN=purA PE=3 SV=1	Q10ZD0	27	28	32	23	22	21	15	23	26
Aldose 1-epimerase OS=Trichodesmium erythraeum (strain IMS101) GN=Tery_3963 PE=4 SV=1	Q10XN6	41	31	40	23	23	24	20	24	20
Allophycocyanin, beta subunit OS=Trichodesmium erythraeum (strain IMS101) GN=Tery_3835 PE=3 SV=1	Q10XZ6	79	86	94	54	78	79	70	64	76
Amidohydrolase OS=Trichodesmium erythraeum (strain IMS101) GN=Tery_3690 PE=4 SV=1	Q10YC3	7	4	8	4	2	2	2	5	2
Aminotransferase OS=Trichodesmium erythraeum (strain IMS101) GN=Tery_0293 PE=3 SV=1	Q119Q1	33	41	42	23	31	25	20	31	33
Ankyrin OS=Trichodesmium erythraeum (strain IMS101) GN=Tery_0982 PE=4 SV=1	Q117G2	19	18	17	8	12	4	9	9	12
Anti-sigma factor antagonist OS=Trichodesmium erythraeum (strain IMS101) GN=Tery_0920 PE=3 SV=1	Q117K6	1	5	2	0	0	1	1	2	2
Anti-sigma factor antagonist OS=Trichodesmium erythraeum (strain IMS101) GN=Tery_5015 PE=3 SV=1	Q10UZ7	41	40	44	23	37	22	27	22	27
Argininosuccinate lyase OS=Trichodesmium erythraeum (strain IMS101) GN=argH PE=3 SV=1	Q118A3	16	21	21	14	14	12	9	18	16
ATP synthase epsilon chain OS=Trichodesmium erythraeum (strain IMS101) GN=atpC PE=3 SV=1	Q10Z37	39	37	38	28	28	26	24	31	27
ATP-dependent Clp protease adapter protein ClpS OS=Trichodesmium erythraeum (strain IMS101) GN=clpS PE=3 SV=1	Q10Y18	4	5	4	0	0	4	2	2	4
Beta-N-acetylhexosaminidase OS=Trichodesmium erythraeum (strain IMS101) GN=Tery_3725 PE=4 SV=1	Q10Y93	7	5	6	0	0	0	0	6	3
Bifunctional protein PyrR OS=Trichodesmium erythraeum (strain IMS101) GN=pyrR PE=3 SV=1	Q114G0	5	5	6	0	2	2	3	4	3
C-methyltransferase OS=Trichodesmium erythraeum (strain IMS101) GN=Tery_2265 PE=4 SV=1	Q112T1	32	32	29	25	25	18	16	33	20
Carbamoyl-phosphate synthase large chain OS=Trichodesmium erythraeum (strain IMS101) GN=carB PE=3 SV=1	Q110M4	89	72	75	64	70	66	55	68	56
Carboxypeptidase Taq. Metallo peptidase. MEROPS family M32 OS=Trichodesmium erythraeum (strain IMS101) GN=Tery_3995 PE=4 SV=1	Q10XK6	0	1	4	0	0	0	0	0	0
Cationic trypsin OS=Bos taurus PE=1 SV=3	P00760	9	9	16	6	3	10	7	5	9
Cell division protein SepF OS=Trichodesmium erythraeum (strain IMS101) GN=sepF PE=3 SV=1	Q10V94	4	6	3	0	0	2	0	4	0
CHAD domain containing protein OS=Trichodesmium erythraeum (strain IMS101) GN=Tery_4897 PE=4 SV=1	Q10VA3	2	3	2	0	0	0	0	3	0
Circadian clock protein KaiB OS=Trichodesmium erythraeum (strain IMS101) GN=kaiB PE=3 SV=1	Q10Y25	12	10	12	5	7	5	4	9	6
Cytochrome c oxidase subunit 2 OS=Trichodesmium erythraeum (strain IMS101) GN=Tery_0278 PE=3 SV=1	Q119R4	21	19	23	12	13	12	9	15	0
Cytochrome c6 OS=Trichodesmium erythraeum (strain IMS101) GN=petJ PE=3 SV=1	Q111R3	33	17	32	0	6	4	0	9	9
Cytochrome f OS=Trichodesmium erythraeum (strain IMS101) GN=petA PE=3 SV=1	Q114L7	36	32	37	14	20	22	17	24	18
D-isomer specific 2-hydroxyacid dehydrogenase, NAD-binding OS=Trichodesmium erythraeum (strain IMS101) GN=Tery_0368 PE=3 SV=1	Q119I7	3	2	4	1	0	1	3	3	2
Delta-aminolevulinic acid dehydratase OS=Trichodesmium erythraeum (strain IMS101) GN=Tery_4608 PE=3 SV=1	Q10VZ2	26	23	25	18	15	17	20	21	25
Dihydropteroate synthase OS=Trichodesmium erythraeum (strain IMS101) GN=Tery_0699 PE=4 SV=1	Q118E0	3	0	6	0	0	0	0	3	0
Elongation factor G 1 OS=Trichodesmium erythraeum (strain IMS101) GN=fusA1 PE=3 SV=1	Q118Z3	43	50	57	27	30	28	23	32	29
Elongation factor G 2 OS=Trichodesmium erythraeum (strain IMS101) GN=fusA2 PE=3 SV=1	Q10W80	170	173	190	135	136	156	132	165	118
Elongation factor Tu OS=Trichodesmium erythraeum (strain IMS101) GN=tuf PE=3 SV=1	Q118Z2	290	264	253	226	220	237	204	252	201
Fe-S metabolism associated SufE OS=Trichodesmium erythraeum (strain IMS101) GN=Tery_4443 PE=4 SV=1	Q10WE4	3	2	4	0	0	0	0	1	0
Ferredoxin (2Fe-2S) OS=Trichodesmium erythraeum (strain IMS101) GN=Tery_0914 PE=4 SV=1	Q117L1	10	0	6	0	0	0	2	0	0
Ferritin and Dps OS=Trichodesmium erythraeum (strain IMS101) GN=dps PE=3 SV=1	Q5GMY2	35	28	39	10	12	8	5	9	4
Ferrochelatase OS=Trichodesmium erythraeum (strain IMS101) GN=hemH PE=3 SV=1	Q10WR6	4	4	0	0	0	0	0	0	0
Glutathione S-transferase-like OS=Trichodesmium erythraeum (strain IMS101) GN=Tery_4017 PE=4 SV=1	Q10XI9	59	58	56	43	46	43	45	54	48
Glyceraldehyde-3-phosphate dehydrogenase OS=Trichodesmium erythraeum (strain IMS101) GN=Tery_3274 PE=3 SV=1	Q10ZD8	7	8	8	4	3	5	4	5	5
Glyceraldehyde-3-phosphate dehydrogenase OS=Trichodesmium erythraeum (strain IMS101) GN=Tery_4030 PE=3 SV=1	Q10XH6	98	102	111	82	76	85	88	97	76
Glycosyl transferase, family 9 OS=Trichodesmium erythraeum (strain IMS101) GN=Tery_0610 PE=4 SV=1	Q118M0	34	32	29	17	24	21	28	29	19
HAD-superfamily hydrolase, subfamily IA, variant 3 OS=Trichodesmium erythraeum (strain IMS101) GN=Tery_0680 PE=4 SV=1	Q118F7	4	2	4	0	0	1	0	1	1
Heavy metal translocating P-type ATPase OS=Trichodesmium erythraeum (strain IMS101) GN=Tery_1562 PE=3 SV=1	Q115I2	6	5	8	4	2	0	0	2	2
Histidinol dehydrogenase OS=Trichodesmium erythraeum (strain IMS101) GN=hisD PE=3 SV=1	Q110G8	4	4	7	0	3	0	2	3	2
Iron-sulfur cluster assembly accessory protein OS=Trichodesmium erythraeum (strain IMS101) GN=Tery_3951 PE=3 SV=1	Q10XP5	6	6	7	5	0	4	3	4	6
L-proline dehydrogenase / delta-1-pyrroline-5-carboxylate dehydrogenase OS=Trichodesmium erythraeum (strain IMS101) GN=Tery_3446 PE=3 SV=1	Q10YY5	8	10	8	5	5	4	8	10	8
LSU ribosomal protein L25P OS=Trichodesmium erythraeum (strain IMS101) GN=Tery_3283 PE=3 SV=1	Q10ZC9	22	20	23	14	15	12	14	16	11
Macrophage migration inhibitory factor OS=Trichodesmium erythraeum (strain IMS101) GN=Tery_1915 PE=4 SV=1	Q114A4	4	4	3	3	0	0	2	3	4
Mannose-1-phosphate guanylyltransferase (GDP) OS=Trichodesmium erythraeum (strain IMS101) GN=Tery_1856 PE=4 SV=1	Q114G2	0	1	5	0	0	0	0	0	0
Methionine synthase (B12-dependent) OS=Trichodesmium erythraeum (strain IMS101) GN=Tery_2492 PE=4 SV=1	REVERSE_Q111X5	2	3	0	0	0	0	0	0	0
Methyl-accepting chemotaxis sensory transducer OS=Trichodesmium erythraeum (strain IMS101) GN=Tery_4229 PE=4 SV=1	Q10WZ4	32	28	29	20	20	22	14	19	23
Methylenetetrahydrofolate reductase OS=Trichodesmium erythraeum (strain IMS101) GN=Tery_4692 PE=3 SV=1	Q10VR8	8	10	9	6	5	4	2	8	7
Methyltransferase type 11 OS=Trichodesmium erythraeum (strain IMS101) GN=Tery_2390 PE=4 SV=1	Q112G6	28	25	25	18	21	14	14	19	18
Methyltransferase type 11 OS=Trichodesmium erythraeum (strain IMS101) GN=Tery_3753 PE=4 SV=1	Q10Y69	11	13	10	3	6	5	2	8	10
MscS Mechanosensitive ion channel OS=Trichodesmium erythraeum (strain IMS101) GN=Tery_0209 PE=4 SV=1	REVERSE_Q119X6	4	6	0	0	0	1	0	6	0
Na-Ca exchanger/integrin-beta4 OS=Trichodesmium erythraeum (strain IMS101) GN=Tery_0599 PE=4 SV=1	Q118N1	14	9	10	6	7	5	0	9	6
NAD(P) transhydrogenase subunit beta OS=Trichodesmium erythraeum (strain IMS101) GN=Tery_4703 PE=3 SV=1	Q10VQ8	3	3	0	0	0	0	1	3	0
NADPH-protochlorophyllide oxidoreductase / chlorophyll synthase OS=Trichodesmium erythraeum (strain IMS101) GN=Tery_0109 PE=4 SV=1	Q11A66	9	6	8	5	3	4	6	6	3
NifEN OS=Trichodesmium erythraeum (strain IMS101) GN=nifEN PE=3 SV=1	Q9KJL7	26	22	31	19	19	17	10	17	18
Nucleotidyl transferase OS=Trichodesmium erythraeum (strain IMS101) GN=Tery_1143 PE=4 SV=1	Q116R9	2	1	3	0	0	0	0	3	5
OstA-like protein OS=Trichodesmium erythraeum (strain IMS101) GN=Tery_2273 PE=4 SV=1	Q112S3	2	3	0	0	0	0	0	3	0
Oxidoreductase, molybdopterin binding OS=Trichodesmium erythraeum (strain IMS101) GN=Tery_0060 PE=4 SV=1	Q11AA1	7	9	4	2	4	2	0	3	2
Peptidase M16C associated OS=Trichodesmium erythraeum (strain IMS101) GN=Tery_1179 PE=4 SV=1	Q116N7	62	66	57	44	55	53	41	59	48
Peptidase M48, Ste24p OS=Trichodesmium erythraeum (strain IMS101) GN=Tery_1907 PE=3 SV=1	Q114B2	1	3	4	0	0	0	0	0	0
Peptidase M50 OS=Trichodesmium erythraeum (strain IMS101) GN=Tery_3191 PE=4 SV=1	Q10ZK9	0	0	6	0	0	0	0	0	0
Peptidase S1 and S6, chymotrypsin/Hap OS=Trichodesmium erythraeum (strain IMS101) GN=Tery_3517 PE=4 SV=1	Q10YR7	30	26	32	26	22	16	19	24	23
Peptidase S1 and S6, chymotrypsin/Hap OS=Trichodesmium erythraeum (strain IMS101) GN=Tery_4416 PE=4 SV=1	Q10WH0	9	8	8	0	2	2	2	4	0
Peptidase S8 and S53, subtilisin, kexin, sedolisin OS=Trichodesmium erythraeum (strain IMS101) GN=Tery_2196 PE=4 SV=1	Q112Z9	5	4	6	2	2	2	3	4	3
Periplasmic solute binding protein OS=Trichodesmium erythraeum (strain IMS101) GN=Tery_3218 PE=3 SV=1	Q10ZI8	2	2	1	0	0	0	0	0	0
Photosystem I iron-sulfur center OS=Trichodesmium erythraeum (strain IMS101) GN=psaC PE=3 SV=1	Q119B1	65	54	68	44	46	51	48	50	42
Photosystem I P700 chlorophyll a apoprotein A2 OS=Trichodesmium erythraeum (strain IMS101) GN=psaB PE=3 SV=1	Q10VT8	67	40	48	40	38	44	39	35	38
Photosystem I protein PsaD OS=Trichodesmium erythraeum (strain IMS101) GN=Tery_3791 PE=4 SV=1	Q10Y37	100	79	100	66	63	74	59	71	67
Photosystem I reaction center protein PsaF, subunit III OS=Trichodesmium erythraeum (strain IMS101) GN=Tery_1634 PE=4 SV=1	Q115B4	66	47	55	40	42	40	46	33	43
Photosystem I reaction center subunit IV OS=Trichodesmium erythraeum (strain IMS101) GN=psaE PE=3 SV=1	Q117D3	73	48	70	42	38	45	47	42	37
Photosystem I reaction center subunit XI OS=Trichodesmium erythraeum (strain IMS101) GN=psaL PE=3 SV=1	Q116L4	23	13	25	4	2	14	12	8	5
Photosystem II 12 kDa extrinsic protein OS=Trichodesmium erythraeum (strain IMS101) GN=psbU PE=3 SV=1	Q10VH7	81	72	79	63	61	68	63	62	62
Phycobilisome linker polypeptide OS=Trichodesmium erythraeum (strain IMS101) GN=Tery_0985 PE=3 SV=1	Q117F9	104	102	94	86	82	97	77	105	80
Phycobilisome protein OS=Trichodesmium erythraeum (strain IMS101) GN=Tery_0996 PE=3 SV=1	Q117F0	251	258	267	195	247	219	213	213	175
Plastocyanin OS=Trichodesmium erythraeum (strain IMS101) GN=Tery_2563 PE=4 SV=1	Q111R2	88	100	81	70	65	83	73	91	56
Prolyl oligopeptidase. Serine peptidase. MEROPS family S09A OS=Trichodesmium erythraeum (strain IMS101) GN=Tery_3157 PE=4 SV=1	Q10ZN9	7	6	3	2	3	2	0	3	1
Protein serine/threonine phosphatase OS=Trichodesmium erythraeum (strain IMS101) GN=Tery_1950 PE=4 SV=1	Q113X1	4	4	3	0	3	0	0	3	3
Protein serine/threonine phosphatases OS=Trichodesmium erythraeum (strain IMS101) GN=Tery_3297 PE=4 SV=1	Q10ZB9	8	7	8	4	3	3	0	5	4
Protein translocase subunit SecY OS=Trichodesmium erythraeum (strain IMS101) GN=secY PE=3 SV=1	Q110C5	0	4	1	0	0	0	0	0	0
Putative endoribonuclease L-PSP OS=Trichodesmium erythraeum (strain IMS101) GN=Tery_2416 PE=4 SV=1	Q112E1	17	19	22	12	14	12	11	17	11
Putative galactoside ABC transporter OS=Trichodesmium erythraeum (strain IMS101) GN=Tery_0801 PE=4 SV=1	Q117V6	16	14	11	7	11	6	5	10	8
Putative RNA methylase OS=Trichodesmium erythraeum (strain IMS101) GN=Tery_0249 PE=3 SV=1	Q119T9	5	3	4	0	0	0	0	2	0
Putative secreted protein OS=Trichodesmium erythraeum (strain IMS101) GN=Tery_0706 PE=4 SV=1	Q118D4	37	33	37	22	23	20	23	26	23
Response regulator receiver protein OS=Trichodesmium erythraeum (strain IMS101) GN=Tery_3248 PE=4 SV=1	Q10ZG2	16	15	14	8	11	8	7	12	8
Rho termination factor-like OS=Trichodesmium erythraeum (strain IMS101) GN=Tery_0149 PE=4 SV=1	Q11A30	56	48	51	44	42	38	35	44	37
RNA-binding region RNP-1 OS=Trichodesmium erythraeum (strain IMS101) GN=Tery_4702 PE=4 SV=1	Q10VQ9	127	107	104	93	100	112	84	122	85
Rod shape-determining protein MreB OS=Trichodesmium erythraeum (strain IMS101) GN=Tery_1150 PE=4 SV=1	Q116R2	14	13	12	7	10	6	10	8	8
Serine O-acetyltransferase OS=Trichodesmium erythraeum (strain IMS101) GN=Tery_3017 PE=4 SV=1	Q110A2	3	3	4	1	1	1	0	0	0
Signal peptide peptidase A. Serine peptidase. MEROPS family S49 OS=Trichodesmium erythraeum (strain IMS101) GN=Tery_2494 PE=4 SV=1	Q111X3	23	20	15	9	18	13	13	14	10
Signal recognition particle protein OS=Trichodesmium erythraeum (strain IMS101) GN=ffh PE=3 SV=1	Q111T7	22	27	19	16	14	14	15	18	15
Single-stranded nucleic acid binding R3H OS=Trichodesmium erythraeum (strain IMS101) GN=Tery_4711 PE=4 SV=1	Q10VQ0	2	2	3	0	1	0	2	4	2
Transaldolase OS=Trichodesmium erythraeum (strain IMS101) GN=tal PE=3 SV=1	Q119R0	167	153	182	150	138	100	103	137	106
Transcriptional regulator AbrB OS=Trichodesmium erythraeum (strain IMS101) GN=Tery_1859 PE=4 SV=1	Q114F9	96	89	84	71	76	75	78	74	75
Transketolase-like OS=Trichodesmium erythraeum (strain IMS101) GN=Tery_0721 PE=3 SV=1	Q118C1	185	174	197	141	149	150	116	173	123
Trigger factor OS=Trichodesmium erythraeum (strain IMS101) GN=tig PE=3 SV=1	Q118P4	97	91	95	79	81	78	73	83	85
Tryptophan--tRNA ligase OS=Trichodesmium erythraeum (strain IMS101) GN=trpS PE=3 SV=1	Q10VR7	10	9	9	3	6	5	6	8	5
Uncharacterized protein OS=Trichodesmium erythraeum (strain IMS101) GN=Tery_0679 PE=4 SV=1	Q118F8	4	1	4	0	1	1	0	0	2
Uncharacterized protein OS=Trichodesmium erythraeum (strain IMS101) GN=Tery_0741 PE=4 SV=1	Q118A2	5	7	6	0	3	2	0	0	0
Uncharacterized protein OS=Trichodesmium erythraeum (strain IMS101) GN=Tery_0766 PE=4 SV=1	Q117Y1	2	3	3	0	1	0	0	1	1
Uncharacterized protein OS=Trichodesmium erythraeum (strain IMS101) GN=Tery_0863 PE=4 SV=1	Q117Q5	25	25	28	17	18	13	15	21	20
Uncharacterized protein OS=Trichodesmium erythraeum (strain IMS101) GN=Tery_1316 PE=4 SV=1	Q116D4	11	8	11	4	6	6	8	10	4
Uncharacterized protein OS=Trichodesmium erythraeum (strain IMS101) GN=Tery_1531 PE=4 SV=1	Q115L2	4	6	8	3	3	1	4	2	4
Uncharacterized protein OS=Trichodesmium erythraeum (strain IMS101) GN=Tery_1805 PE=4 SV=1	Q114L2	0	4	2	0	0	0	0	3	0
Uncharacterized protein OS=Trichodesmium erythraeum (strain IMS101) GN=Tery_1943 PE=4 SV=1	Q113X7	73	72	81	51	61	53	34	63	42
Uncharacterized protein OS=Trichodesmium erythraeum (strain IMS101) GN=Tery_2500 PE=4 SV=1	Q111W7	3	1	3	1	0	0	0	0	0
Uncharacterized protein OS=Trichodesmium erythraeum (strain IMS101) GN=Tery_2613 PE=4 SV=1	Q111L6	55	49	46	37	41	35	27	35	37
Uncharacterized protein OS=Trichodesmium erythraeum (strain IMS101) GN=Tery_3123 PE=4 SV=1	Q10ZR9	1	2	5	0	1	0	2	0	1
Uncharacterized protein OS=Trichodesmium erythraeum (strain IMS101) GN=Tery_3152 PE=4 SV=1	Q10ZP2	27	26	24	20	19	13	17	18	17
Uncharacterized protein OS=Trichodesmium erythraeum (strain IMS101) GN=Tery_3366 PE=4 SV=1	Q10Z56	0	10	22	0	0	14	11	12	0
Uncharacterized protein OS=Trichodesmium erythraeum (strain IMS101) GN=Tery_3476 PE=4 SV=1	Q10YV8	0	3	3	0	0	0	0	0	0
Uncharacterized protein OS=Trichodesmium erythraeum (strain IMS101) GN=Tery_3625 PE=4 SV=1	Q10YH9	5	7	9	2	1	1	4	3	2
Uncharacterized protein OS=Trichodesmium erythraeum (strain IMS101) GN=Tery_3743 PE=4 SV=1	Q10Y78	17	19	21	11	13	10	9	12	14
Uncharacterized protein OS=Trichodesmium erythraeum (strain IMS101) GN=Tery_3829 PE=4 SV=1	Q10Y02	7	8	5	4	3	1	2	6	5
Uncharacterized protein OS=Trichodesmium erythraeum (strain IMS101) GN=Tery_3870 PE=4 SV=1	Q10XW5	13	12	13	5	7	9	6	10	5
Uncharacterized protein OS=Trichodesmium erythraeum (strain IMS101) GN=Tery_3933 PE=4 SV=1	Q10XR0	5	6	5	4	2	0	0	5	4
Uncharacterized protein OS=Trichodesmium erythraeum (strain IMS101) GN=Tery_4120 PE=4 SV=1	Q10X96	36	32	37	26	29	17	15	28	22
Uncharacterized protein OS=Trichodesmium erythraeum (strain IMS101) GN=Tery_4161 PE=4 SV=1	Q10X57	14	19	20	11	10	6	9	12	11
Uncharacterized protein OS=Trichodesmium erythraeum (strain IMS101) GN=Tery_4197 PE=4 SV=1	Q10X23	4	4	3	0	1	1	0	2	0
Uncharacterized protein OS=Trichodesmium erythraeum (strain IMS101) GN=Tery_4280 PE=4 SV=1	Q10WU7	10	8	7	2	5	2	0	6	6
Uncharacterized protein OS=Trichodesmium erythraeum (strain IMS101) GN=Tery_4381 PE=4 SV=1	Q10WK3	8	6	7	2	4	3	3	3	0
Uncharacterized protein OS=Trichodesmium erythraeum (strain IMS101) GN=Tery_4691 PE=4 SV=1	Q10VR9	4	3	1	0	0	0	0	1	1
Uncharacterized protein OS=Trichodesmium erythraeum (strain IMS101) GN=Tery_4709 PE=4 SV=1	Q10VQ2	6	7	8	0	5	5	0	6	5
UspA OS=Trichodesmium erythraeum (strain IMS101) GN=Tery_4503 PE=3 SV=1	Q10W85	98	95	97	78	81	87	73	89	80
Zinc metalloprotease OS=Trichodesmium erythraeum (strain IMS101) GN=Tery_3268 PE=3 SV=1	Q10ZE4	21	19	20	16	12	9	10	13	13
Aminotransferase, class V OS=Trichodesmium erythraeum (strain IMS101) GN=Tery_4134 PE=3 SV=1	Q10X82	8	9	8	8	12	11	8	10	10
Gas vesicle structural protein OS=Trichodesmium erythraeum (strain IMS101) GN=gvpA PE=3 SV=1	Q112M7	0	0	5	4	0	0	0	4	0
Hemolysin-type calcium-binding region OS=Trichodesmium erythraeum (strain IMS101) GN=Tery_0419 PE=4 SV=1	Q119E3	68	64	68	71	76	73	67	79	69
Hemolysin-type calcium-binding region OS=Trichodesmium erythraeum (strain IMS101) GN=Tery_0424 PE=4 SV=1	Q119E0	35	32	34	34	38	35	29	38	35
Na-Ca exchanger/integrin-beta4 OS=Trichodesmium erythraeum (strain IMS101) GN=Tery_0601 PE=4 SV=1	Q118M9	0	0	8	8	0	9	0	0	0
Na-Ca exchanger/integrin-beta4 OS=Trichodesmium erythraeum (strain IMS101) GN=Tery_0657 PE=4 SV=1	Q118H8	8	8	10	0	9	6	0	13	8
Na-Ca exchanger/integrin-beta4 OS=Trichodesmium erythraeum (strain IMS101) GN=Tery_4497 PE=4 SV=1	Q10W91	7	7	6	10	8	8	0	12	8
NifS OS=Trichodesmium erythraeum (strain IMS101) GN=nifS PE=3 SV=1	Q9KJL9	0	9	7	0	11	10	7	9	9
Photosystem II protein D1 1 OS=Trichodesmium erythraeum (strain IMS101) GN=psbA1 PE=3 SV=1	Q11A00	26	26	32	22	26	28	22	30	26
Phycobilisome linker polypeptide OS=Trichodesmium erythraeum (strain IMS101) GN=Tery_2209 PE=3 SV=1	Q112Y6	184	180	196	172	170	177	139	165	164
Phycobilisome linker polypeptide OS=Trichodesmium erythraeum (strain IMS101) GN=Tery_2210 PE=3 SV=1	Q112Y5	136	131	149	128	128	135	98	126	132
Phycobilisome protein OS=Trichodesmium erythraeum (strain IMS101) GN=Tery_0997 PE=3 SV=1	Q117E9	135	130	146	133	133	120	108	124	126
Putative signal transduction protein with Nacht domain OS=Trichodesmium erythraeum (strain IMS101) GN=Tery_2498 PE=4 SV=1	Q111W9	4	7	3	4	10	10	0	11	2
Ribulose-1,5-bisphosphate carboxylase/oxygenase large subunit (Fragment) OS=Trichodesmium erythraeum (strain IMS101) GN=rbcL PE=3 SV=1	Q2ACI4	0	0	0	0	0	0	0	0	0
Transcriptional regulator, Crp/Fnr family OS=Trichodesmium erythraeum (strain IMS101) GN=Tery_2023 PE=4 SV=1	Q113Q4	16	20	16	12	18	20	17	22	14
Uncharacterized protein OS=Trichodesmium erythraeum (strain IMS101) GN=Tery_3117 PE=4 SV=1	Q10ZS4	7	9	4	3	7	3	4	4	6
Uncharacterized protein OS=Trichodesmium erythraeum (strain IMS101) GN=Tery_4236 PE=4 SV=1	Q10WY8	0	9	0	3	7	3	0	0	0
1-(5-phosphoribosyl)-5-[(5-phosphoribosylamino)methylideneamino] imidazole-4-carboxamide isomerase OS=Trichodesmium erythraeum (strain IMS101) GN=hisA PE=3 SV=1	Q10Y87	11	16	11	11	16	14	16	16	12
1-acyl-sn-glycerol-3-phosphate acyltransferase OS=Trichodesmium erythraeum (strain IMS101) GN=Tery_1819 PE=3 SV=1	Q114J8	0	0	1	0	0	0	0	0	0
1-Cys peroxiredoxin OS=Trichodesmium erythraeum (strain IMS101) GN=Tery_5038 PE=4 SV=1	Q10UX6	93	91	90	102	104	105	92	112	87
1-deoxy-D-xylulose 5-phosphate reductoisomerase OS=Trichodesmium erythraeum (strain IMS101) GN=dxr PE=3 SV=1	Q119E5	2	2	0	0	0	0	0	1	0
1-deoxy-D-xylulose-5-phosphate synthase OS=Trichodesmium erythraeum (strain IMS101) GN=dxs PE=3 SV=1	Q10ZY2	0	2	2	0	2	2	0	3	2
1,4-alpha-glucan branching enzyme GlgB OS=Trichodesmium erythraeum (strain IMS101) GN=glgB PE=3 SV=1	Q114I1	24	24	24	27	27	29	22	31	27
1,4-dihydroxy-2-naphthoyl-CoA synthase OS=Trichodesmium erythraeum (strain IMS101) GN=menB PE=3 SV=1	Q10XC8	4	0	2	2	4	0	0	2	3
2-amino-4-hydroxy-6-hydroxymethyldihydropteridine pyrophosphokinase OS=Trichodesmium erythraeum (strain IMS101) GN=Tery_0688 PE=4 SV=1	Q118E9	6	6	6	3	4	6	3	6	4
2-C-methyl-D-erythritol 4-phosphate cytidylyltransferase OS=Trichodesmium erythraeum (strain IMS101) GN=ispD PE=3 SV=1	Q118M1	10	10	11	10	8	9	5	9	6
2-isopropylmalate synthase OS=Trichodesmium erythraeum (strain IMS101) GN=leuA PE=3 SV=1	Q112U2	2	4	1	3	6	3	3	5	5
2-isopropylmalate synthase OS=Trichodesmium erythraeum (strain IMS101) GN=Tery_0286 PE=3 SV=1	Q119Q8	0	0	0	0	1	0	0	2	1
2-succinyl-5-enolpyruvyl-6-hydroxy-3-cyclohexene-1-carboxylate synthase OS=Trichodesmium erythraeum (strain IMS101) GN=menD PE=3 SV=1	Q10XD8	1	0	0	0	0	0	0	0	0
2,3-bisphosphoglycerate-independent phosphoglycerate mutase OS=Trichodesmium erythraeum (strain IMS101) GN=gpmI PE=3 SV=1	Q117D6	4	5	5	2	5	2	1	4	2
2,3-dimethylmalate lyase OS=Trichodesmium erythraeum (strain IMS101) GN=Tery_4268 PE=4 SV=1	Q10WV9	4	3	3	3	3	3	5	3	4
2OG-Fe(II) oxygenase OS=Trichodesmium erythraeum (strain IMS101) GN=Tery_3466 PE=4 SV=1	Q10YW7	0	2	0	1	1	3	0	2	0
3-deoxy-D-arabinoheptulosonate-7-phosphate synthase OS=Trichodesmium erythraeum (strain IMS101) GN=Tery_0171 PE=4 SV=1	Q11A11	5	8	5	9	10	6	10	9	10
3-deoxy-D-arabinoheptulosonate-7-phosphate synthase OS=Trichodesmium erythraeum (strain IMS101) GN=Tery_4537 PE=4 SV=1	Q10W57	0	0	0	0	0	0	0	0	1
3-hydroxyacyl-[acyl-carrier-protein] dehydratase FabZ OS=Trichodesmium erythraeum (strain IMS101) GN=fabZ PE=3 SV=1	Q10ZA2	13	9	17	13	10	10	7	10	12
3-isopropylmalate dehydratase, small subunit OS=Trichodesmium erythraeum (strain IMS101) GN=Tery_1041 PE=3 SV=1	Q117B1	6	6	5	5	5	7	4	4	3
3-isopropylmalate dehydrogenase OS=Trichodesmium erythraeum (strain IMS101) GN=leuB PE=3 SV=1	Q10WI3	64	65	66	67	72	68	53	66	68
3-mercaptopyruvate sulfurtransferase OS=Trichodesmium erythraeum (strain IMS101) GN=Tery_0556 PE=4 SV=1	Q118S0	2	3	5	3	4	1	2	2	2
3-methyl-2-oxobutanoate hydroxymethyltransferase OS=Trichodesmium erythraeum (strain IMS101) GN=panB PE=3 SV=1	Q10WG3	0	1	0	0	0	0	0	1	0
3-oxoacyl-[acyl-carrier-protein] reductase OS=Trichodesmium erythraeum (strain IMS101) GN=Tery_3438 PE=4 SV=1	Q10YZ3	48	49	56	41	41	43	38	40	46
3-oxoacyl-[acyl-carrier-protein] synthase 2 OS=Trichodesmium erythraeum (strain IMS101) GN=Tery_0451 PE=3 SV=1	Q119B4	33	29	30	27	27	26	18	34	25
3-phosphoshikimate 1-carboxyvinyltransferase OS=Trichodesmium erythraeum (strain IMS101) GN=aroA PE=3 SV=1	Q10VA4	9	10	10	11	12	10	4	12	7
3'-5' exonuclease OS=Trichodesmium erythraeum (strain IMS101) GN=Tery_1621 PE=4 SV=1	Q115C4	9	6	8	6	7	7	3	6	6
3'-nucleotidase / exopolyphosphatase / 5'-nucleotidase OS=Trichodesmium erythraeum (strain IMS101) GN=Tery_2384 PE=4 SV=1	Q112H0	12	11	12	10	10	7	10	10	8
3'(2'),5'-bisphosphate nucleotidase OS=Trichodesmium erythraeum (strain IMS101) GN=Tery_1792 PE=4 SV=1	Q114M3	21	30	29	16	21	22	26	28	19
30S ribosomal protein S10 OS=Trichodesmium erythraeum (strain IMS101) GN=rpsJ PE=3 SV=1	Q118Z1	29	29	22	23	21	20	21	22	20
30S ribosomal protein S11 OS=Trichodesmium erythraeum (strain IMS101) GN=rpsK PE=3 SV=1	Q110D0	18	17	16	15	16	14	9	17	16
30S ribosomal protein S12 OS=Trichodesmium erythraeum (strain IMS101) GN=rpsL PE=3 SV=1	Q118Z5	13	0	9	0	7	6	0	9	0
30S ribosomal protein S13 OS=Trichodesmium erythraeum (strain IMS101) GN=rpsM PE=3 SV=1	Q110C9	52	40	36	38	37	27	17	35	32
30S ribosomal protein S14 OS=Trichodesmium erythraeum (strain IMS101) GN=rpsN PE=3 SV=1	Q10ZE2	16	18	20	15	17	13	14	16	13
30S ribosomal protein S16 OS=Trichodesmium erythraeum (strain IMS101) GN=rpsP PE=3 SV=1	Q111T6	47	43	51	48	45	37	31	41	40
30S ribosomal protein S17 OS=Trichodesmium erythraeum (strain IMS101) GN=rpsQ PE=3 SV=1	Q110B6	28	29	25	28	27	24	27	28	27
30S ribosomal protein S18 OS=Trichodesmium erythraeum (strain IMS101) GN=rpsR PE=3 SV=1	Q10Y89	16	16	16	17	12	14	13	15	15
30S ribosomal protein S19 OS=Trichodesmium erythraeum (strain IMS101) GN=rpsS PE=3 SV=1	Q110B1	9	9	12	6	4	10	8	13	4
30S ribosomal protein S2 OS=Trichodesmium erythraeum (strain IMS101) GN=rpsB PE=3 SV=1	Q116Q2	46	45	50	39	40	36	27	40	41
30S ribosomal protein S3 OS=Trichodesmium erythraeum (strain IMS101) GN=rpsC PE=3 SV=1	Q110B3	59	61	57	56	58	60	39	62	54
30S ribosomal protein S4 OS=Trichodesmium erythraeum (strain IMS101) GN=rpsD PE=3 SV=1	Q119M5	54	43	44	46	42	41	36	52	38
30S ribosomal protein S5 OS=Trichodesmium erythraeum (strain IMS101) GN=rpsE PE=3 SV=1	Q110C3	47	40	53	40	37	38	30	41	36
30S ribosomal protein S6 OS=Trichodesmium erythraeum (strain IMS101) GN=rpsF PE=3 SV=1	Q10XV0	30	29	31	28	31	26	23	26	23
30S ribosomal protein S7 OS=Trichodesmium erythraeum (strain IMS101) GN=rpsG PE=3 SV=1	Q118Z4	77	78	68	65	64	60	53	62	61
30S ribosomal protein S8 OS=Trichodesmium erythraeum (strain IMS101) GN=rpsH PE=3 SV=1	Q110C0	32	28	25	26	26	26	21	32	25
4-alpha-glucanotransferase OS=Trichodesmium erythraeum (strain IMS101) GN=Tery_1296 PE=3 SV=1	Q116E8	32	29	32	29	26	35	20	32	26
4-diphosphocytidyl-2-C-methyl-D-erythritol kinase OS=Trichodesmium erythraeum (strain IMS101) GN=ispE PE=3 SV=1	Q10VR1	4	0	3	0	2	2	2	3	0
4-hydroxy-3-methylbut-2-en-1-yl diphosphate synthase (ferredoxin) OS=Trichodesmium erythraeum (strain IMS101) GN=ispG PE=3 SV=1	Q10W70	0	0	0	0	0	0	0	0	3
4-hydroxy-3-methylbut-2-enyl diphosphate reductase OS=Trichodesmium erythraeum (strain IMS101) GN=ispH PE=3 SV=1	Q10WA8	0	0	0	0	1	0	0	0	0
4-hydroxy-tetrahydrodipicolinate reductase OS=Trichodesmium erythraeum (strain IMS101) GN=dapB PE=3 SV=1	Q10YI1	27	25	23	22	22	25	18	24	20
4-hydroxy-tetrahydrodipicolinate synthase OS=Trichodesmium erythraeum (strain IMS101) GN=dapA PE=3 SV=1	Q118P2	37	37	40	35	38	31	29	38	32
5-methyltetrahydropteroyltriglutamate--homocysteine methyltransferase OS=Trichodesmium erythraeum (strain IMS101) GN=metE PE=3 SV=1	REVERSE_Q117R7	0	0	0	0	0	0	0	0	0
5-oxoprolinase (ATP-hydrolyzing) OS=Trichodesmium erythraeum (strain IMS101) GN=Tery_1019 PE=4 SV=1	Q117C9	0	0	0	0	0	0	0	2	0
5'-nucleotidase SurE OS=Trichodesmium erythraeum (strain IMS101) GN=surE PE=3 SV=1	Q10YV3	5	5	4	3	5	5	0	0	4
50S ribosomal protein L14 OS=Trichodesmium erythraeum (strain IMS101) GN=rplN PE=3 SV=1	Q110B7	34	31	31	27	27	28	22	30	24
50S ribosomal protein L16 OS=Trichodesmium erythraeum (strain IMS101) GN=rplP PE=3 SV=1	Q110B4	18	16	17	19	18	16	18	21	19
50S ribosomal protein L17 OS=Trichodesmium erythraeum (strain IMS101) GN=rplQ PE=3 SV=1	Q110D2	27	28	32	23	28	17	20	25	27
50S ribosomal protein L18 OS=Trichodesmium erythraeum (strain IMS101) GN=rplR PE=3 SV=1	Q110C2	22	20	21	20	19	22	17	21	18
50S ribosomal protein L19 OS=Trichodesmium erythraeum (strain IMS101) GN=rplS PE=3 SV=1	Q119S3	48	56	57	52	56	38	42	53	53
50S ribosomal protein L22 OS=Trichodesmium erythraeum (strain IMS101) GN=rplV PE=3 SV=1	Q110B2	29	31	34	26	26	22	20	30	26
50S ribosomal protein L23 OS=Trichodesmium erythraeum (strain IMS101) GN=rplW PE=3 SV=1	Q110A9	62	58	55	54	51	45	49	50	54
50S ribosomal protein L24 OS=Trichodesmium erythraeum (strain IMS101) GN=rplX PE=3 SV=1	Q110B8	5	7	6	5	6	6	5	6	5
50S ribosomal protein L27 OS=Trichodesmium erythraeum (strain IMS101) GN=rpmA PE=3 SV=1	Q10ZG7	14	12	15	8	10	11	7	12	10
50S ribosomal protein L28 OS=Trichodesmium erythraeum (strain IMS101) GN=rpmB PE=3 SV=1	Q10X90	13	12	12	9	7	8	8	9	9
50S ribosomal protein L29 OS=Trichodesmium erythraeum (strain IMS101) GN=rpmC PE=3 SV=1	Q110B5	31	26	26	22	22	19	18	19	19
50S ribosomal protein L31 OS=Trichodesmium erythraeum (strain IMS101) GN=rpmE PE=3 SV=1	Q110D6	11	12	14	6	8	9	7	9	6
50S ribosomal protein L32 OS=Trichodesmium erythraeum (strain IMS101) GN=rpmF PE=3 SV=1	Q118B3	0	0	0	0	0	1	0	2	0
50S ribosomal protein L33 OS=Trichodesmium erythraeum (strain IMS101) GN=rpmG PE=3 SV=1	Q10Y90	17	19	15	14	17	11	12	15	16
50S ribosomal protein L36 OS=Trichodesmium erythraeum (strain IMS101) GN=rpmJ PE=3 SV=1	Q110C8	0	0	0	0	0	0	0	7	0
6-phosphogluconolactonase OS=Trichodesmium erythraeum (strain IMS101) GN=Tery_0535 PE=4 SV=1	Q118T7	50	44	52	42	42	42	36	47	36
6,7-dimethyl-8-ribityllumazine synthase OS=Trichodesmium erythraeum (strain IMS101) GN=ribH PE=3 SV=1	Q115U3	4	5	6	6	8	7	3	6	6
60 kDa chaperonin 1 OS=Trichodesmium erythraeum (strain IMS101) GN=groL1 PE=3 SV=1	Q119S1	257	253	253	254	261	294	249	273	251
60 kDa chaperonin 2 OS=Trichodesmium erythraeum (strain IMS101) GN=groL2 PE=3 SV=1	Q10WQ4	341	355	353	356	365	372	324	409	342
60 kDa inner membrane insertion protein OS=Trichodesmium erythraeum (strain IMS101) GN=Tery_4710 PE=3 SV=1	Q10VQ1	5	9	5	10	10	11	3	9	9
7,8-dihydroneopterin aldolase OS=Trichodesmium erythraeum (strain IMS101) GN=Tery_0687 PE=3 SV=1	Q118F0	21	21	20	16	19	15	16	20	18
8-amino-7-oxononanoate synthase OS=Trichodesmium erythraeum (strain IMS101) GN=Tery_1973 PE=3 SV=1	Q113V0	0	0	0	0	0	0	0	0	0
AAA ATPase, central region OS=Trichodesmium erythraeum (strain IMS101) GN=Tery_2214 PE=4 SV=1	Q112Y1	1	0	2	1	0	0	0	1	0
AAA ATPase, central region OS=Trichodesmium erythraeum (strain IMS101) GN=Tery_4713 PE=4 SV=1	Q10VP8	0	0	1	0	0	0	0	0	0
ABC transporter related OS=Trichodesmium erythraeum (strain IMS101) GN=Tery_0199 PE=3 SV=1	Q119Y6	7	5	6	5	4	3	1	4	4
ABC transporter related OS=Trichodesmium erythraeum (strain IMS101) GN=Tery_0299 PE=4 SV=1	Q119P6	2	0	0	0	0	0	0	0	0
ABC transporter related OS=Trichodesmium erythraeum (strain IMS101) GN=Tery_0800 PE=4 SV=1	REVERSE_Q117V7	0	1	0	0	0	0	0	0	0
ABC transporter related OS=Trichodesmium erythraeum (strain IMS101) GN=Tery_0800 PE=4 SV=1	Q117V7	0	0	0	0	0	0	0	1	0
ABC transporter related OS=Trichodesmium erythraeum (strain IMS101) GN=Tery_0828 PE=4 SV=1	Q117T2	0	0	0	0	0	0	0	0	0
ABC transporter related OS=Trichodesmium erythraeum (strain IMS101) GN=Tery_2001 PE=4 SV=1	Q113S4	0	0	0	0	0	0	0	4	1
ABC transporter related OS=Trichodesmium erythraeum (strain IMS101) GN=Tery_2411 PE=4 SV=1	Q112E6	7	7	5	4	4	3	2	5	5
ABC transporter related OS=Trichodesmium erythraeum (strain IMS101) GN=Tery_3222 PE=3 SV=1	Q10ZI4	2	3	4	0	4	0	0	1	3
ABC transporter related OS=Trichodesmium erythraeum (strain IMS101) GN=Tery_3394 PE=4 SV=1	Q10Z29	2	1	3	0	2	2	2	2	3
ABC transporter related OS=Trichodesmium erythraeum (strain IMS101) GN=Tery_3407 PE=4 SV=1	Q10Z16	0	0	0	0	0	0	0	0	0
ABC transporter related OS=Trichodesmium erythraeum (strain IMS101) GN=Tery_3746 PE=4 SV=1	Q10Y75	0	0	0	0	1	0	0	1	0
ABC transporter related OS=Trichodesmium erythraeum (strain IMS101) GN=Tery_3782 PE=4 SV=1	Q10Y45	1	0	0	0	2	0	0	0	0
ABC transporter related OS=Trichodesmium erythraeum (strain IMS101) GN=Tery_4399 PE=4 SV=1	Q10WI7	0	0	1	0	0	0	0	0	0
ABC-1 OS=Trichodesmium erythraeum (strain IMS101) GN=Tery_1043 PE=4 SV=1	Q117A9	0	0	0	0	1	0	0	0	0
ABC-1 OS=Trichodesmium erythraeum (strain IMS101) GN=Tery_1043 PE=4 SV=1	REVERSE_Q117A9	0	0	0	0	0	0	0	0	0
ABC-1 OS=Trichodesmium erythraeum (strain IMS101) GN=Tery_2512 PE=4 SV=1	Q111V6	1	4	1	0	1	0	2	0	2
ABC-1 OS=Trichodesmium erythraeum (strain IMS101) GN=Tery_3296 PE=4 SV=1	Q10ZC0	10	10	5	11	11	8	3	9	11
ABC-1 OS=Trichodesmium erythraeum (strain IMS101) GN=Tery_3425 PE=4 SV=1	Q10Z03	0	2	0	0	2	0	1	1	1
ABC-type phosphate transport system periplasmic component-like OS=Trichodesmium erythraeum (strain IMS101) GN=Tery_1967 PE=4 SV=1	Q113V5	3	6	6	2	5	2	2	4	5
Abhydrolase domain containing 14A-like OS=Trichodesmium erythraeum (strain IMS101) GN=Tery_0781 PE=4 SV=1	Q117X2	0	3	2	1	3	5	1	0	1
Acetolactate synthase OS=Trichodesmium erythraeum (strain IMS101) GN=Tery_2843 PE=3 SV=1	Q110Q7	6	9	6	5	10	5	4	7	6
Acetolactate synthase, large subunit OS=Trichodesmium erythraeum (strain IMS101) GN=Tery_1928 PE=3 SV=1	Q113Z1	38	39	41	32	40	38	37	43	37
Acetolactate synthase, small subunit OS=Trichodesmium erythraeum (strain IMS101) GN=Tery_1850 PE=4 SV=1	Q114G8	15	18	14	10	15	15	12	15	13
Acetyl-coenzyme A carboxylase carboxyl transferase subunit alpha / biotin carboxylase OS=Trichodesmium erythraeum (strain IMS101) GN=Tery_3707 PE=4 SV=1	Q10YA8	16	11	14	16	17	13	16	21	16
Acetyl-coenzyme A carboxylase carboxyl transferase subunit alpha OS=Trichodesmium erythraeum (strain IMS101) GN=accA PE=3 SV=1	Q117H3	4	3	5	3	0	2	0	0	2
Acetyl-coenzyme A carboxylase carboxyl transferase subunit beta OS=Trichodesmium erythraeum (strain IMS101) GN=accD PE=3 SV=1	Q111F1	8	10	5	8	9	6	6	8	9
Acetyl-coenzyme A synthetase OS=Trichodesmium erythraeum (strain IMS101) GN=acsA PE=3 SV=1	Q112I3	37	47	46	47	50	47	48	51	44
Acetylglutamate kinase OS=Trichodesmium erythraeum (strain IMS101) GN=argB PE=3 SV=1	Q116Q9	29	30	30	25	22	22	24	26	23
Acireductone dioxygenase OS=Trichodesmium erythraeum (strain IMS101) GN=mtnD PE=3 SV=1	Q111G3	3	2	0	2	2	2	3	3	0
Aconitate hydratase B OS=Trichodesmium erythraeum (strain IMS101) GN=Tery_0664 PE=3 SV=1	Q118H1	12	8	14	8	7	6	6	6	6
Aconitate hydratase B OS=Trichodesmium erythraeum (strain IMS101) GN=Tery_0664 PE=3 SV=1	REVERSE_Q118H1	0	0	0	0	0	0	0	0	0
Acriflavin resistance protein OS=Trichodesmium erythraeum (strain IMS101) GN=Tery_2378 PE=3 SV=1	Q112H6	0	0	0	0	0	0	0	0	0
Acyl carrier protein OS=Trichodesmium erythraeum (strain IMS101) GN=acpP PE=3 SV=1	Q119B3	29	28	23	27	32	38	26	25	30
Acyl-[acyl-carrier-protein]--UDP-N-acetylglucosamine O-acyltransferase OS=Trichodesmium erythraeum (strain IMS101) GN=lpxA PE=3 SV=1	Q10ZA1	0	0	0	0	0	0	0	0	0
Adenylate cyclase OS=Trichodesmium erythraeum (strain IMS101) GN=Tery_2731 PE=4 SV=1	Q111A9	3	1	0	1	1	0	0	0	0
Adenylate kinase OS=Trichodesmium erythraeum (strain IMS101) GN=adk PE=3 SV=1	Q110C6	48	47	52	47	46	42	43	47	38
Adenylate/guanylate cyclase OS=Trichodesmium erythraeum (strain IMS101) GN=Tery_0647 PE=4 SV=1	Q118I7	0	0	0	0	0	0	0	0	0
Adenylate/guanylate cyclase OS=Trichodesmium erythraeum (strain IMS101) GN=Tery_2417 PE=3 SV=1	Q112E0	0	0	0	0	0	0	0	0	0
Adenylate/guanylate cyclase OS=Trichodesmium erythraeum (strain IMS101) GN=Tery_3155 PE=4 SV=1	Q10ZP1	0	0	0	0	0	0	0	0	0
Adenylosuccinate lyase OS=Trichodesmium erythraeum (strain IMS101) GN=Tery_4169 PE=3 SV=1	Q10X49	0	11	4	9	7	7	4	11	9
Alanine dehydrogenase OS=Trichodesmium erythraeum (strain IMS101) GN=Tery_3174 PE=3 SV=1	Q10ZM3	3	8	8	6	6	4	3	5	5
Alanine--tRNA ligase OS=Trichodesmium erythraeum (strain IMS101) GN=alaS PE=3 SV=1	Q10VG8	8	11	8	9	6	7	6	8	10
Alcohol dehydrogenase, zinc-binding OS=Trichodesmium erythraeum (strain IMS101) GN=Tery_0561 PE=4 SV=1	Q118R5	0	3	4	4	5	6	4	6	5
Alcohol dehydrogenase, zinc-binding OS=Trichodesmium erythraeum (strain IMS101) GN=Tery_0562 PE=4 SV=1	Q118R4	0	0	0	0	0	0	0	0	0
Alcohol dehydrogenase, zinc-binding OS=Trichodesmium erythraeum (strain IMS101) GN=Tery_1832 PE=4 SV=1	Q114I6	20	16	19	14	15	9	9	16	13
Alcohol dehydrogenase, zinc-binding OS=Trichodesmium erythraeum (strain IMS101) GN=Tery_2910 PE=4 SV=1	Q110J6	4	6	8	5	6	6	3	5	7
Aldehyde decarbonylase OS=Trichodesmium erythraeum (strain IMS101) GN=Tery_2280 PE=3 SV=1	Q112R8	1	6	0	0	9	0	4	1	7
Aldehyde dehydrogenase OS=Trichodesmium erythraeum (strain IMS101) GN=Tery_1926 PE=4 SV=1	Q113Z3	40	45	51	40	52	43	36	53	43
Aldehyde dehydrogenase OS=Trichodesmium erythraeum (strain IMS101) GN=Tery_2652 PE=3 SV=1	Q111H8	5	6	2	3	5	0	2	4	3
Aldo/keto reductase OS=Trichodesmium erythraeum (strain IMS101) GN=Tery_0458 PE=4 SV=1	Q119A8	10	10	8	11	10	7	8	11	11
Aldo/keto reductase OS=Trichodesmium erythraeum (strain IMS101) GN=Tery_2155 PE=4 SV=1	Q113D5	0	1	0	0	0	0	0	0	0
Aldo/keto reductase OS=Trichodesmium erythraeum (strain IMS101) GN=Tery_2669 PE=4 SV=1	Q111G2	14	17	10	16	20	14	13	15	13
Aldo/keto reductase OS=Trichodesmium erythraeum (strain IMS101) GN=Tery_2756 PE=4 SV=1	Q110Y5	8	7	7	8	7	10	5	6	6
Aldo/keto reductase OS=Trichodesmium erythraeum (strain IMS101) GN=Tery_3126 PE=4 SV=1	Q10ZR6	11	14	10	10	15	12	6	12	8
Aldo/keto reductase OS=Trichodesmium erythraeum (strain IMS101) GN=Tery_4535 PE=4 SV=1	Q10W59	1	1	0	0	1	0	0	2	0
Allergen V5/Tpx-1 related OS=Trichodesmium erythraeum (strain IMS101) GN=Tery_4341 PE=4 SV=1	Q10WP1	0	0	0	1	1	0	0	1	0
Allophycocyanin, beta subunit OS=Trichodesmium erythraeum (strain IMS101) GN=Tery_3649 PE=3 SV=1	Q10YG1	420	469	443	436	422	399	414	401	433
Alpha amylase, catalytic region OS=Trichodesmium erythraeum (strain IMS101) GN=Tery_4392 PE=4 SV=1	Q10WJ4	3	6	4	5	5	4	4	6	5
Alpha-1,4 glucan phosphorylase OS=Trichodesmium erythraeum (strain IMS101) GN=Tery_0218 PE=3 SV=1	REVERSE_Q119W7	1	0	0	0	0	0	0	2	0
Alpha-1,4 glucan phosphorylase OS=Trichodesmium erythraeum (strain IMS101) GN=Tery_0218 PE=3 SV=1	Q119W7	38	42	36	36	43	35	30	47	40
Alpha-1,4 glucan phosphorylase OS=Trichodesmium erythraeum (strain IMS101) GN=Tery_3694 PE=3 SV=1	Q10YB9	71	75	77	73	76	68	52	81	75
Alpha-amylase 1 OS=Homo sapiens GN=AMY1A PE=1 SV=2	REVERSE_P04745	0	0	0	0	0	0	0	0	1
Alpha-amylase 1 OS=Homo sapiens GN=AMY1A PE=1 SV=2	P04745	0	0	0	0	0	0	0	0	0
Alpha-glucosidase OS=Trichodesmium erythraeum (strain IMS101) GN=Tery_4624 PE=3 SV=1	REVERSE_Q10VX8	0	0	0	0	0	0	0	0	0
Alpha-S1-casein OS=Bos taurus GN=CSN1S1 PE=1 SV=2	P02662	0	0	0	0	0	0	0	0	0
Alpha/beta hydrolase fold OS=Trichodesmium erythraeum (strain IMS101) GN=Tery_0604 PE=4 SV=1	Q118M6	0	1	1	0	0	0	0	0	0
Alpha/beta hydrolase fold OS=Trichodesmium erythraeum (strain IMS101) GN=Tery_1797 PE=4 SV=1	Q114L8	9	10	10	8	10	9	8	9	7
Alpha/beta hydrolase fold OS=Trichodesmium erythraeum (strain IMS101) GN=Tery_3526 PE=4 SV=1	Q10YQ9	0	3	0	0	3	0	0	0	0
Alpha/beta hydrolase fold OS=Trichodesmium erythraeum (strain IMS101) GN=Tery_3663 PE=4 SV=1	Q10YE9	11	12	13	8	13	10	5	11	12
Aluminium resistance OS=Trichodesmium erythraeum (strain IMS101) GN=Tery_1438 PE=4 SV=1	Q115U1	0	0	0	0	2	0	0	0	0
Amidohydrolase 3 OS=Trichodesmium erythraeum (strain IMS101) GN=Tery_4570 PE=4 SV=1	Q10W28	0	0	1	0	0	0	0	0	0
Amidophosphoribosyltransferase OS=Trichodesmium erythraeum (strain IMS101) GN=purF PE=3 SV=1	Q10YB6	0	0	0	0	0	0	0	0	0
Amine oxidase OS=Trichodesmium erythraeum (strain IMS101) GN=Tery_1383 PE=3 SV=1	Q115Y4	2	4	3	3	4	3	2	4	3
Amino acid permease-associated region OS=Trichodesmium erythraeum (strain IMS101) GN=Tery_1903 PE=4 SV=1	Q114B6	1	2	1	1	1	2	0	4	2
Aminodeoxychorismate lyase OS=Trichodesmium erythraeum (strain IMS101) GN=Tery_4376 PE=4 SV=1	Q10WK7	0	0	0	0	2	0	2	0	2
Aminomethyltransferase OS=Trichodesmium erythraeum (strain IMS101) GN=gcvT PE=3 SV=1	Q113P0	40	41	44	41	36	41	33	46	36
Aminomethyltransferase OS=Trichodesmium erythraeum (strain IMS101) GN=gcvT PE=3 SV=1	REVERSE_Q113P0	0	0	0	0	0	0	0	0	0
Aminopeptidase P. Metallo peptidase. MEROPS family M24B OS=Trichodesmium erythraeum (strain IMS101) GN=Tery_4599 PE=4 SV=1	Q10VZ9	13	9	10	11	13	12	7	13	9
Aminopyrimidine aminohydrolase OS=Trichodesmium erythraeum (strain IMS101) GN=Tery_0300 PE=3 SV=1	Q119P5	10	7	11	5	9	7	7	3	7
Aminotransferase OS=Trichodesmium erythraeum (strain IMS101) GN=Tery_0487 PE=3 SV=1	Q118Y1	0	2	1	2	2	3	0	2	1
Aminotransferase OS=Trichodesmium erythraeum (strain IMS101) GN=Tery_1023 PE=4 SV=1	Q117C5	6	6	10	4	9	8	6	9	9
Aminotransferase OS=Trichodesmium erythraeum (strain IMS101) GN=Tery_3525 PE=4 SV=1	Q10YR0	0	0	2	0	1	0	0	0	0
Aminotransferase OS=Trichodesmium erythraeum (strain IMS101) GN=Tery_3688 PE=4 SV=1	Q10YC5	10	9	15	7	8	8	7	10	7
Aminotransferase, class V OS=Trichodesmium erythraeum (strain IMS101) GN=Tery_0185 PE=3 SV=1	Q119Z8	21	23	19	17	21	22	9	20	19
Aminotransferase, class V OS=Trichodesmium erythraeum (strain IMS101) GN=Tery_0201 PE=3 SV=1	Q119Y4	20	27	30	23	25	27	21	24	25
AMP-dependent synthetase and ligase OS=Trichodesmium erythraeum (strain IMS101) GN=Tery_1829 PE=4 SV=1	Q114I9	19	19	21	18	16	17	11	18	19
AMP-dependent synthetase and ligase OS=Trichodesmium erythraeum (strain IMS101) GN=Tery_2109 PE=4 SV=1	Q113H9	15	16	17	10	15	11	8	12	11
AMP-dependent synthetase and ligase OS=Trichodesmium erythraeum (strain IMS101) GN=Tery_3181 PE=4 SV=1	Q10ZL8	1	0	0	0	0	0	0	0	1
Anion-transporting ATPase OS=Trichodesmium erythraeum (strain IMS101) GN=Tery_0875 PE=4 SV=1	Q117P6	35	35	34	35	40	34	34	43	40
Ankyrin OS=Trichodesmium erythraeum (strain IMS101) GN=Tery_1000 PE=4 SV=1	Q117E6	4	4	5	2	3	2	2	4	4
Anthranilate phosphoribosyltransferase OS=Trichodesmium erythraeum (strain IMS101) GN=trpD PE=3 SV=1	Q112P2	3	2	2	3	2	2	0	2	2
Anthranilate synthase, component I OS=Trichodesmium erythraeum (strain IMS101) GN=Tery_3792 PE=4 SV=1	Q10Y36	2	4	2	1	2	0	0	3	2
Anti-sigma factor antagonist OS=Trichodesmium erythraeum (strain IMS101) GN=Tery_1167 PE=3 SV=1	Q116P6	2	2	4	4	5	5	3	10	1
Anti-sigma factor antagonist OS=Trichodesmium erythraeum (strain IMS101) GN=Tery_5017 PE=3 SV=1	Q10UZ5	6	6	7	6	6	6	4	7	5
Anti-sigma-factor antagonist (STAS) domain protein OS=Trichodesmium erythraeum (strain IMS101) GN=Tery_2311 PE=4 SV=1	Q112N9	14	15	15	14	15	12	14	14	13
Arginine biosynthesis bifunctional protein ArgJ OS=Trichodesmium erythraeum (strain IMS101) GN=argJ PE=3 SV=1	Q11AB4	39	40	35	35	33	33	28	36	33
Arginine--tRNA ligase OS=Trichodesmium erythraeum (strain IMS101) GN=argS PE=3 SV=1	Q10XL4	34	36	31	35	40	34	30	35	29
Argininosuccinate synthase OS=Trichodesmium erythraeum (strain IMS101) GN=argG PE=3 SV=1	Q117P0	22	20	18	23	23	28	25	31	22
Arsenite-activated ATPase ArsA OS=Trichodesmium erythraeum (strain IMS101) GN=Tery_0013 PE=4 SV=1	Q11AD6	14	13	10	10	7	7	5	5	6
Arsenite-activated ATPase ArsA OS=Trichodesmium erythraeum (strain IMS101) GN=Tery_2327 PE=4 SV=1	Q112M5	17	22	25	21	26	20	23	25	24
Asparaginase OS=Trichodesmium erythraeum (strain IMS101) GN=Tery_0258 PE=4 SV=1	Q119T2	18	16	15	16	17	15	13	16	14
Asparaginase OS=Trichodesmium erythraeum (strain IMS101) GN=Tery_4641 PE=4 SV=1	Q10VW2	7	15	10	8	7	5	5	12	5
Asparagine--tRNA ligase OS=Trichodesmium erythraeum (strain IMS101) GN=asnS PE=3 SV=1	Q112U9	21	20	20	16	16	15	9	18	18
Aspartate carbamoyltransferase OS=Trichodesmium erythraeum (strain IMS101) GN=pyrB PE=3 SV=1	Q10WL4	1	0	1	0	0	1	1	2	1
Aspartate kinase OS=Trichodesmium erythraeum (strain IMS101) GN=Tery_0087 PE=4 SV=1	Q11A81	0	1	0	0	1	2	0	1	2
Aspartate kinase OS=Trichodesmium erythraeum (strain IMS101) GN=Tery_0087 PE=4 SV=1	REVERSE_Q11A81	0	0	0	0	0	0	0	0	0
Aspartate--tRNA(Asp/Asn) ligase OS=Trichodesmium erythraeum (strain IMS101) GN=aspS PE=3 SV=1	Q112K0	25	23	21	22	24	24	21	26	19
Aspartate-semialdehyde dehydrogenase OS=Trichodesmium erythraeum (strain IMS101) GN=asd PE=3 SV=1	Q118P3	16	20	20	17	15	20	14	22	20
Aspartyl/glutamyl-tRNA(Asn/Gln) amidotransferase subunit B OS=Trichodesmium erythraeum (strain IMS101) GN=gatB PE=3 SV=1	Q10XY9	40	42	39	43	38	42	29	47	49
Aspartyl/glutamyl-tRNA(Asn/Gln) amidotransferase subunit C OS=Trichodesmium erythraeum (strain IMS101) GN=gatC PE=3 SV=1	Q10W19	2	2	0	1	4	0	3	3	2
Assimilatory nitrite reductase (Ferredoxin) OS=Trichodesmium erythraeum (strain IMS101) GN=Tery_1068 PE=3 SV=1	Q116Y7	0	0	0	0	0	0	0	0	0
ATP phosphoribosyltransferase OS=Trichodesmium erythraeum (strain IMS101) GN=hisG PE=3 SV=1	Q118Q1	4	4	3	6	8	5	5	5	5
ATP synthase subunit alpha OS=Trichodesmium erythraeum (strain IMS101) GN=atpA PE=3 SV=1	Q112Z6	293	283	280	301	292	302	253	320	272
ATP synthase subunit b OS=Trichodesmium erythraeum (strain IMS101) GN=atpF PE=3 SV=1	Q112Z4	54	48	50	46	46	44	57	40	53
ATP synthase subunit b' OS=Trichodesmium erythraeum (strain IMS101) GN=atpG PE=3 SV=1	Q112Z3	75	63	75	63	56	60	42	54	58
ATP synthase subunit beta OS=Trichodesmium erythraeum (strain IMS101) GN=atpD PE=3 SV=1	Q10Z38	428	442	438	449	429	460	401	463	405
ATP synthase subunit c OS=Trichodesmium erythraeum (strain IMS101) GN=atpE PE=3 SV=1	Q112Z2	0	0	0	0	0	2	0	0	0
ATP synthase subunit delta OS=Trichodesmium erythraeum (strain IMS101) GN=atpH PE=3 SV=1	Q112Z5	104	116	118	117	116	110	113	120	120
ATP-binding region, ATPase-like OS=Trichodesmium erythraeum (strain IMS101) GN=Tery_2556 PE=4 SV=1	Q111R7	0	0	0	0	0	0	0	0	0
ATP-binding region, ATPase-like OS=Trichodesmium erythraeum (strain IMS101) GN=Tery_2556 PE=4 SV=1	REVERSE_Q111R7	0	0	0	0	0	0	0	0	0
ATP-binding region, ATPase-like OS=Trichodesmium erythraeum (strain IMS101) GN=Tery_4127 PE=4 SV=1	Q10X89	55	59	55	65	64	67	58	77	62
ATP-dependent Clp protease adapter protein ClpS OS=Trichodesmium erythraeum (strain IMS101) GN=clpS PE=3 SV=1	Q116U1	0	2	0	0	0	0	0	0	0
ATP-dependent Clp protease ATP-binding subunit ClpX OS=Trichodesmium erythraeum (strain IMS101) GN=clpX PE=3 SV=1	Q118P6	5	5	8	3	6	4	3	6	5
ATP-dependent Clp protease proteolytic subunit OS=Trichodesmium erythraeum (strain IMS101) GN=clpP PE=3 SV=1	Q116I0	23	24	22	26	27	27	22	26	30
ATP-dependent Clp protease proteolytic subunit OS=Trichodesmium erythraeum (strain IMS101) GN=clpP PE=3 SV=1	Q118P5	24	22	13	23	25	21	20	18	20
ATP-dependent Clp protease proteolytic subunit OS=Trichodesmium erythraeum (strain IMS101) GN=clpP PE=3 SV=1	Q115M5	6	8	9	6	6	6	2	8	5
ATP-dependent Clp protease proteolytic subunit OS=Trichodesmium erythraeum (strain IMS101) GN=Tery_1246 PE=3 SV=1	Q116I1	54	51	55	45	46	43	45	45	46
ATP-dependent dethiobiotin synthetase BioD OS=Trichodesmium erythraeum (strain IMS101) GN=bioD PE=3 SV=1	Q114H6	0	0	1	0	0	0	0	0	0
ATP-dependent DNA helicase RecQ OS=Trichodesmium erythraeum (strain IMS101) GN=Tery_3264 PE=4 SV=1	Q10ZE8	0	0	0	0	0	0	0	0	1
ATP-dependent DNA helicase RecQ OS=Trichodesmium erythraeum (strain IMS101) GN=Tery_3530 PE=4 SV=1	REVERSE_Q10YQ6	0	0	0	0	0	0	0	0	0
ATP-dependent zinc metalloprotease FtsH OS=Trichodesmium erythraeum (strain IMS101) GN=ftsH PE=3 SV=1	Q10Y67	43	46	55	40	45	44	38	46	42
ATP-dependent zinc metalloprotease FtsH OS=Trichodesmium erythraeum (strain IMS101) GN=ftsH PE=3 SV=1	Q10YV0	2	0	0	1	0	0	1	0	1
ATP-dependent zinc metalloprotease FtsH OS=Trichodesmium erythraeum (strain IMS101) GN=ftsH PE=3 SV=1	Q10W04	43	48	47	39	48	43	36	40	36
ATP-dependent zinc metalloprotease FtsH OS=Trichodesmium erythraeum (strain IMS101) GN=ftsH PE=3 SV=1	Q10ZF7	9	10	13	9	11	10	12	16	10
ATP-dependent zinc metalloprotease FtsH OS=Trichodesmium erythraeum (strain IMS101) GN=ftsH PE=3 SV=1	REVERSE_Q10ZF7	0	0	0	0	0	0	0	0	0
ATPase (AAA+ superfamily)-like OS=Trichodesmium erythraeum (strain IMS101) GN=Tery_3115 PE=4 SV=1	Q10ZS6	1	1	1	1	2	1	0	1	1
ATPase (AAA+ superfamily)-like OS=Trichodesmium erythraeum (strain IMS101) GN=Tery_3115 PE=4 SV=1	REVERSE_Q10ZS6	0	0	0	0	1	0	0	0	0
ATPase AAA-2 OS=Trichodesmium erythraeum (strain IMS101) GN=Tery_2437 PE=3 SV=1	Q112C2	118	131	116	135	133	135	128	143	137
ATPase AAA-2 OS=Trichodesmium erythraeum (strain IMS101) GN=Tery_3151 PE=4 SV=1	Q10ZP3	0	0	0	0	0	0	0	0	0
ATPase associated with various cellular activities, AAA_3 OS=Trichodesmium erythraeum (strain IMS101) GN=Tery_1862 PE=4 SV=1	Q114F6	2	4	4	4	5	4	0	4	2
ATPase associated with various cellular activities, AAA_5 OS=Trichodesmium erythraeum (strain IMS101) GN=Tery_1430 PE=4 SV=1	Q115U8	0	0	2	0	0	0	0	0	0
ATPase associated with various cellular activities, AAA_5 OS=Trichodesmium erythraeum (strain IMS101) GN=Tery_2229 PE=4 SV=1	Q112W6	1	2	1	0	1	0	1	1	0
ATPase OS=Trichodesmium erythraeum (strain IMS101) GN=Tery_4452 PE=4 SV=1	REVERSE_Q10WD5	0	0	0	0	0	0	0	0	0
ATPase-like OS=Trichodesmium erythraeum (strain IMS101) GN=Tery_3642 PE=4 SV=1	Q10YG7	0	0	0	0	0	0	0	0	0
ATPase-like protein OS=Trichodesmium erythraeum (strain IMS101) GN=Tery_1732 PE=4 SV=1	Q114T0	1	2	0	0	0	0	0	0	0
ATPase-like protein OS=Trichodesmium erythraeum (strain IMS101) GN=Tery_2060 PE=4 SV=1	Q113M3	0	0	0	0	0	0	0	0	1
ATPase-like protein OS=Trichodesmium erythraeum (strain IMS101) GN=Tery_2060 PE=4 SV=1	REVERSE_Q113M3	0	0	0	0	0	0	0	0	0
ATPase-like protein OS=Trichodesmium erythraeum (strain IMS101) GN=Tery_2133 PE=4 SV=1	Q113F7	2	0	0	0	2	1	0	1	0
Bacterial nucleoid protein Hbs OS=Trichodesmium erythraeum (strain IMS101) GN=Tery_1610 PE=3 SV=1	Q115D5	128	106	111	126	107	115	119	120	120
Band 7 protein OS=Trichodesmium erythraeum (strain IMS101) GN=Tery_0313 PE=4 SV=1	Q119N5	46	49	46	43	47	47	43	46	45
Basic membrane lipoprotein OS=Trichodesmium erythraeum (strain IMS101) GN=Tery_3674 PE=4 SV=1	Q10YD9	4	5	3	7	7	6	4	6	6
Beta-Ig-H3/fasciclin OS=Trichodesmium erythraeum (strain IMS101) GN=Tery_3372 PE=4 SV=1	Q10Z50	86	91	81	80	89	84	83	85	78
Beta-Ig-H3/fasciclin OS=Trichodesmium erythraeum (strain IMS101) GN=Tery_3373 PE=4 SV=1	Q10Z49	0	0	0	1	2	0	0	1	1
Beta-ketoacyl synthase OS=Trichodesmium erythraeum (strain IMS101) GN=Tery_3819 PE=4 SV=1	REVERSE_Q10Y11	0	0	0	0	0	0	0	0	0
Beta-lactamase OS=Trichodesmium erythraeum (strain IMS101) GN=Tery_0582 PE=4 SV=1	Q118P7	0	0	0	0	0	0	0	0	0
Beta-lactamase OS=Trichodesmium erythraeum (strain IMS101) GN=Tery_1472 PE=4 SV=1	Q115R2	0	0	0	0	0	0	0	0	0
Beta-lactamase-like OS=Trichodesmium erythraeum (strain IMS101) GN=Tery_1865 PE=4 SV=1	Q114F3	0	0	0	0	0	3	0	0	0
Beta-lactamase-like OS=Trichodesmium erythraeum (strain IMS101) GN=Tery_2865 PE=4 SV=1	Q110N6	0	0	0	0	0	0	0	0	0
Beta-lactamase-like OS=Trichodesmium erythraeum (strain IMS101) GN=Tery_3896 PE=4 SV=1	Q10XU3	0	0	0	0	0	0	0	1	0
Bifunctional protein FolD OS=Trichodesmium erythraeum (strain IMS101) GN=folD PE=3 SV=1	Q10X46	6	4	7	5	6	5	2	5	4
Bifunctional protein GlmU OS=Trichodesmium erythraeum (strain IMS101) GN=glmU PE=3 SV=1	Q118R6	5	2	7	5	4	4	3	8	5
Bifunctional purine biosynthesis protein PurH OS=Trichodesmium erythraeum (strain IMS101) GN=purH PE=3 SV=1	Q116T4	51	48	43	42	53	42	35	46	48
Bifunctional purine biosynthesis protein PurH OS=Trichodesmium erythraeum (strain IMS101) GN=purH PE=3 SV=1	REVERSE_Q116T4	0	0	0	0	0	0	0	0	0
Biosynthetic arginine decarboxylase OS=Trichodesmium erythraeum (strain IMS101) GN=speA PE=3 SV=1	Q116S0	0	0	0	0	0	0	0	0	0
Biotin carboxyl carrier protein OS=Trichodesmium erythraeum (strain IMS101) GN=Tery_1314 PE=4 SV=1	Q116D5	24	23	17	17	21	19	13	20	16
BolA-like protein OS=Trichodesmium erythraeum (strain IMS101) GN=Tery_0678 PE=3 SV=1	Q118F9	8	0	8	0	13	0	0	12	10
Branched chain amino acid aminotransferase OS=Trichodesmium erythraeum (strain IMS101) GN=Tery_0889 PE=4 SV=1	Q117N4	7	7	13	6	8	5	6	6	6
C-terminal processing peptidase-2. Serine peptidase. MEROPS family S41A OS=Trichodesmium erythraeum (strain IMS101) GN=Tery_1138 PE=3 SV=1	Q116S4	12	13	12	9	10	18	8	17	11
C-terminal processing peptidase-2. Serine peptidase. MEROPS family S41A OS=Trichodesmium erythraeum (strain IMS101) GN=Tery_2406 PE=3 SV=1	Q112F0	3	2	2	2	4	1	1	1	1
C-terminal processing peptidase-2. Serine peptidase. MEROPS family S41A OS=Trichodesmium erythraeum (strain IMS101) GN=Tery_4518 PE=3 SV=1	Q10W72	14	18	17	13	17	10	11	18	16
Cadherin OS=Trichodesmium erythraeum (strain IMS101) GN=Tery_2591 PE=4 SV=1	Q111N6	0	0	0	2	1	0	0	1	0
Calcium-translocating P-type ATPase, PMCA-type OS=Trichodesmium erythraeum (strain IMS101) GN=Tery_4809 PE=4 SV=1	Q10VG7	9	12	8	10	8	7	7	8	9
Capsular polysaccharide biosynthesis protein-like OS=Trichodesmium erythraeum (strain IMS101) GN=Tery_3098 PE=4 SV=1	Q10ZU1	5	5	3	5	6	6	2	2	6
Capsular polysaccharide biosynthesis protein-like OS=Trichodesmium erythraeum (strain IMS101) GN=Tery_3136 PE=4 SV=1	REVERSE_Q10ZQ8	1	0	0	0	0	3	0	3	0
Carbamoyl-phosphate synthase large chain OS=Trichodesmium erythraeum (strain IMS101) GN=carB PE=3 SV=1	REVERSE_Q110M4	0	0	0	0	0	0	0	0	0
Carbamoyl-phosphate synthase small chain OS=Trichodesmium erythraeum (strain IMS101) GN=carA PE=3 SV=1	Q112P0	6	6	4	2	4	5	2	6	4
Carbamoyltransferase OS=Trichodesmium erythraeum (strain IMS101) GN=Tery_0792 PE=3 SV=1	Q117W3	0	1	0	0	0	0	0	0	0
Carbamoyltransferase OS=Trichodesmium erythraeum (strain IMS101) GN=Tery_1703 PE=4 SV=1	Q114V6	0	0	0	1	3	0	0	0	2
Carbohydrate-selective porin OprB OS=Trichodesmium erythraeum (strain IMS101) GN=Tery_4465 PE=3 SV=1	Q10WC2	159	166	161	175	180	169	154	181	165
Carbonate dehydratase OS=Trichodesmium erythraeum (strain IMS101) GN=Tery_3849 PE=4 SV=1	Q10XY3	133	135	140	143	140	138	95	164	129
Carboxymethylenebutenolidase OS=Trichodesmium erythraeum (strain IMS101) GN=Tery_0392 PE=4 SV=1	Q119G4	10	13	16	10	11	9	8	10	11
Carboxymethylenebutenolidase OS=Trichodesmium erythraeum (strain IMS101) GN=Tery_2503 PE=4 SV=1	Q111W4	8	10	9	6	8	6	4	9	7
Carboxymuconolactone decarboxylase OS=Trichodesmium erythraeum (strain IMS101) GN=Tery_5022 PE=4 SV=1	Q10UZ0	7	5	6	4	8	6	8	7	6
Carotenoid oxygenase OS=Trichodesmium erythraeum (strain IMS101) GN=Tery_3212 PE=4 SV=1	Q10ZJ3	0	3	0	0	0	0	0	0	0
Carotenoid oxygenase OS=Trichodesmium erythraeum (strain IMS101) GN=Tery_3794 PE=4 SV=1	Q10Y34	0	0	0	2	0	0	0	0	0
Cell division protein FtsZ OS=Trichodesmium erythraeum (strain IMS101) GN=ftsZ PE=3 SV=1	Q10Y59	28	25	23	24	22	21	11	20	19
Cell division topological specificity factor OS=Trichodesmium erythraeum (strain IMS101) GN=minE PE=3 SV=1	Q10Z39	2	2	0	0	3	2	0	1	0
Cell envelope-related transcriptional attenuator OS=Trichodesmium erythraeum (strain IMS101) GN=Tery_2604 PE=4 SV=1	Q111M5	0	0	0	0	0	0	0	0	0
Cell surface protein OS=Trichodesmium erythraeum (strain IMS101) GN=Tery_1874 PE=4 SV=1	Q114E4	8	8	5	5	5	4	7	7	0
Cell wall hydrolase/autolysin OS=Trichodesmium erythraeum (strain IMS101) GN=Tery_4034 PE=4 SV=1	Q10XH3	5	13	12	7	13	10	3	10	11
Chaperone DnaJ-like OS=Trichodesmium erythraeum (strain IMS101) GN=Tery_4013 PE=4 SV=1	Q10XJ1	0	0	0	0	0	1	0	0	0
Chaperone protein ClpB OS=Trichodesmium erythraeum (strain IMS101) GN=clpB PE=3 SV=1	Q10YU4	0	16	14	11	11	10	0	0	14
Chaperone protein ClpB OS=Trichodesmium erythraeum (strain IMS101) GN=clpB PE=3 SV=1	Q118T1	24	25	19	21	26	18	15	27	22
Chaperone protein DnaJ OS=Trichodesmium erythraeum (strain IMS101) GN=dnaJ PE=3 SV=1	Q114R3	17	17	14	18	22	15	8	20	17
Chaperone protein DnaK OS=Trichodesmium erythraeum (strain IMS101) GN=dnaK PE=2 SV=1	Q116E2	176	176	182	190	180	181	171	189	177
Chaperone protein DnaK OS=Trichodesmium erythraeum (strain IMS101) GN=dnaK PE=2 SV=1	Q10XJ2	5	4	6	3	5	3	2	4	3
Chaperone protein DnaK OS=Trichodesmium erythraeum (strain IMS101) GN=dnaK PE=2 SV=1	Q114R4	15	18	12	12	15	12	3	15	10
Chaperonin-like RbcX OS=Trichodesmium erythraeum (strain IMS101) GN=Tery_4409 PE=4 SV=1	Q10WH7	2	1	0	0	3	2	2	1	0
CheW protein OS=Trichodesmium erythraeum (strain IMS101) GN=Tery_3247 PE=4 SV=1	Q10ZG3	0	0	0	0	0	0	0	0	0
Chlorophyll synthase OS=Trichodesmium erythraeum (strain IMS101) GN=Tery_0876 PE=4 SV=1	Q117P5	0	0	0	0	0	0	0	0	0
Chorismate synthase OS=Trichodesmium erythraeum (strain IMS101) GN=aroC PE=3 SV=1	Q110N5	6	6	6	4	6	2	1	3	4
Chromophore lyase CpcS/CpeS 1 OS=Trichodesmium erythraeum (strain IMS101) GN=cpcS1 PE=3 SV=1	Q10ZK3	1	2	0	2	3	2	0	3	2
Chromophore lyase CpcS/CpeS 2 OS=Trichodesmium erythraeum (strain IMS101) GN=cpcS2 PE=3 SV=1	Q10XT3	7	4	6	2	4	3	3	3	3
Chromophore lyase CpcS/CpeS 3 OS=Trichodesmium erythraeum (strain IMS101) GN=cpcS3 PE=3 SV=1	Q10XB0	9	9	10	5	7	12	9	10	8
Chromophore lyase CpcS/CpeS 4 OS=Trichodesmium erythraeum (strain IMS101) GN=cpcS4 PE=3 SV=1	Q10XA5	0	2	0	0	0	0	0	2	2
Chromophore lyase CpcT/CpeT 2 OS=Trichodesmium erythraeum (strain IMS101) GN=cpcT2 PE=3 SV=1	Q10UX2	2	0	2	3	0	0	0	3	2
Chromosome segregation ATPase OS=Trichodesmium erythraeum (strain IMS101) GN=Tery_4230 PE=4 SV=1	Q10WZ3	0	0	1	1	0	0	0	0	0
Chromosome segregation ATPase-like protein OS=Trichodesmium erythraeum (strain IMS101) GN=Tery_0894 PE=4 SV=1	REVERSE_Q117M9	0	0	0	0	0	0	0	0	0
Chromosome segregation ATPase-like protein OS=Trichodesmium erythraeum (strain IMS101) GN=Tery_0894 PE=4 SV=1	Q117M9	0	0	0	0	0	0	0	0	0
Chromosome segregation ATPase-like protein OS=Trichodesmium erythraeum (strain IMS101) GN=Tery_1351 PE=4 SV=1	Q116B0	0	1	1	3	2	2	0	2	3
Chromosome segregation ATPase-like protein OS=Trichodesmium erythraeum (strain IMS101) GN=Tery_1496 PE=4 SV=1	Q115P1	6	8	6	5	7	6	4	5	4
Chromosome segregation ATPase-like protein OS=Trichodesmium erythraeum (strain IMS101) GN=Tery_1497 PE=4 SV=1	REVERSE_Q115P0	0	0	0	0	0	0	0	0	0
CinA-like protein OS=Trichodesmium erythraeum (strain IMS101) GN=Tery_2662 PE=3 SV=1	Q111G9	6	6	4	5	5	5	4	6	5
Circadian clock protein kinase KaiC OS=Trichodesmium erythraeum (strain IMS101) GN=kaiC PE=3 SV=1	Q10Y24	15	16	19	15	18	11	5	17	17
Citrate synthase OS=Trichodesmium erythraeum (strain IMS101) GN=Tery_1580 PE=3 SV=1	Q115G4	23	30	29	23	24	21	19	24	26
Class II aldolase/adducin-like OS=Trichodesmium erythraeum (strain IMS101) GN=Tery_4305 PE=4 SV=1	Q10WS4	0	2	0	0	3	5	0	3	4
Clostridial hydrophobic OS=Trichodesmium erythraeum (strain IMS101) GN=Tery_2459 PE=4 SV=1	Q112A3	19	21	19	17	19	14	16	22	15
Cna B-type OS=Trichodesmium erythraeum (strain IMS101) GN=Tery_3498 PE=4 SV=1	Q10YT6	166	172	174	164	170	150	146	169	158
CO2 hydration protein OS=Trichodesmium erythraeum (strain IMS101) GN=Tery_0347 PE=4 SV=1	Q119K6	2	1	1	0	0	0	1	0	0
CoA-binding OS=Trichodesmium erythraeum (strain IMS101) GN=Tery_2396 PE=4 SV=1	Q112G0	1	3	4	0	3	1	0	0	3
Cob(I)yrinic acid a,c-diamide adenosyltransferase OS=Trichodesmium erythraeum (strain IMS101) GN=Tery_0786 PE=4 SV=1	Q117W8	20	25	18	18	25	17	11	27	21
Cob(I)yrinic acid a,c-diamide adenosyltransferase OS=Trichodesmium erythraeum (strain IMS101) GN=Tery_2088 PE=4 SV=1	Q113J6	1	4	0	0	3	0	3	3	2
Cob(I)yrinic acid a,c-diamide adenosyltransferase OS=Trichodesmium erythraeum (strain IMS101) GN=Tery_4685 PE=4 SV=1	Q10VS5	3	7	2	5	5	8	2	10	3
Cobalamin synthesis protein, P47K OS=Trichodesmium erythraeum (strain IMS101) GN=Tery_0441 PE=4 SV=1	Q119C4	0	0	0	0	0	0	0	0	0
Cobyric acid synthase OS=Trichodesmium erythraeum (strain IMS101) GN=cobQ PE=3 SV=1	Q10XP0	0	0	0	0	0	0	0	0	0
Conserved TM helix OS=Trichodesmium erythraeum (strain IMS101) GN=Tery_0500 PE=4 SV=1	Q118W9	2	0	0	0	1	1	0	1	1
CopG-like DNA-binding OS=Trichodesmium erythraeum (strain IMS101) GN=Tery_4108 PE=4 SV=1	Q10XA8	9	11	8	8	9	4	3	8	9
Copper-translocating P-type ATPase OS=Trichodesmium erythraeum (strain IMS101) GN=Tery_1307 PE=3 SV=1	Q116E1	0	0	0	0	0	0	0	0	0
CpcD phycobilisome linker-like OS=Trichodesmium erythraeum (strain IMS101) GN=Tery_0986 PE=4 SV=1	Q117F8	17	15	21	17	21	19	10	22	21
Creatininase OS=Trichodesmium erythraeum (strain IMS101) GN=Tery_0217 PE=4 SV=1	Q119W8	7	7	9	8	8	6	6	9	5
CTP synthase OS=Trichodesmium erythraeum (strain IMS101) GN=pyrG PE=3 SV=1	Q110M9	0	0	0	0	0	1	0	0	1
Cupin 4 OS=Trichodesmium erythraeum (strain IMS101) GN=Tery_3032 PE=4 SV=1	Q10ZZ1	2	2	2	0	0	1	0	2	0
Cupin 4 OS=Trichodesmium erythraeum (strain IMS101) GN=Tery_3032 PE=4 SV=1	REVERSE_Q10ZZ1	0	0	0	0	0	0	0	0	0
Cupin region OS=Trichodesmium erythraeum (strain IMS101) GN=Tery_1475 PE=4 SV=1	Q115R0	1	0	0	0	1	0	0	0	0
Cyanophycin synthetase OS=Trichodesmium erythraeum (strain IMS101) GN=Tery_1965 PE=3 SV=1	Q113V7	63	69	70	64	78	60	48	65	60
Cyanophycinase OS=Trichodesmium erythraeum (strain IMS101) GN=Tery_1964 PE=3 SV=1	Q113V8	23	26	22	22	24	31	22	23	25
Cyclase/dehydrase OS=Trichodesmium erythraeum (strain IMS101) GN=Tery_3955 PE=4 SV=1	Q10XP2	0	0	0	0	0	1	0	0	0
Cyclic nucleotide-binding protein OS=Trichodesmium erythraeum (strain IMS101) GN=Tery_1037 PE=4 SV=1	Q117B5	4	2	2	2	4	3	2	2	1
Cysteine desulfurase IscS OS=Trichodesmium erythraeum (strain IMS101) GN=iscS PE=3 SV=1	Q10XG6	0	0	1	0	0	0	0	1	1
Cysteine desulfurase OS=Trichodesmium erythraeum (strain IMS101) GN=Tery_4358 PE=3 SV=1	Q10WM4	0	0	0	0	0	0	0	0	0
Cysteine synthase OS=Trichodesmium erythraeum (strain IMS101) GN=Tery_1235 PE=3 SV=1	Q116I9	73	67	73	62	64	61	58	62	61
Cysteine--tRNA ligase OS=Trichodesmium erythraeum (strain IMS101) GN=cysS PE=3 SV=1	Q10XJ9	16	20	19	23	21	18	16	22	17
Cytochrome b559 subunit alpha OS=Trichodesmium erythraeum (strain IMS101) GN=psbE PE=3 SV=1	Q10YT0	26	24	24	22	30	31	31	25	32
Cytochrome b6 OS=Trichodesmium erythraeum (strain IMS101) GN=petB PE=3 SV=1	Q116S5	9	8	8	5	7	6	4	6	5
Cytochrome b6-f complex iron-sulfur subunit OS=Trichodesmium erythraeum (strain IMS101) GN=petC PE=3 SV=1	Q114L6	21	20	27	16	17	19	15	27	16
Cytochrome b6-f complex subunit 4 OS=Trichodesmium erythraeum (strain IMS101) GN=petD PE=3 SV=1	Q116S6	7	6	0	2	6	9	4	7	8
Cytochrome c oxidase subunit 1 OS=Trichodesmium erythraeum (strain IMS101) GN=Tery_0277 PE=3 SV=1	Q119R5	8	7	7	7	9	3	3	6	4
Cytochrome c oxidase subunit 1 OS=Trichodesmium erythraeum (strain IMS101) GN=Tery_1778 PE=3 SV=1	Q114N7	0	0	0	0	4	0	0	2	5
Cytochrome c-550 OS=Trichodesmium erythraeum (strain IMS101) GN=psbV PE=3 SV=1	Q111E9	28	26	31	23	23	26	21	24	22
Cytochrome c-550-like protein OS=Trichodesmium erythraeum (strain IMS101) GN=psbV2 PE=3 SV=1	Q111E8	5	7	8	4	8	6	7	4	6
Cytochrome c, class I OS=Trichodesmium erythraeum (strain IMS101) GN=Tery_4618 PE=4 SV=1	Q10VY3	0	0	0	0	0	0	0	0	0
D-3-phosphoglycerate dehydrogenase OS=Trichodesmium erythraeum (strain IMS101) GN=Tery_4196 PE=3 SV=1	Q10X24	78	78	83	71	77	75	67	83	71
D-alanine--D-alanine ligase OS=Trichodesmium erythraeum (strain IMS101) GN=ddl PE=3 SV=1	Q10X06	8	6	5	5	4	4	3	6	4
D-alanine--D-alanine ligase OS=Trichodesmium erythraeum (strain IMS101) GN=Tery_2970 PE=3 SV=1	Q110E6	0	0	0	0	0	0	0	0	0
D-aminoacyl-tRNA deacylase OS=Trichodesmium erythraeum (strain IMS101) GN=dtd3 PE=3 SV=1	Q110H0	0	3	2	0	2	1	0	2	0
D-fructose 1,6-bisphosphatase class 2/sedoheptulose 1,7-bisphosphatase OS=Trichodesmium erythraeum (strain IMS101) GN=Tery_0948 PE=3 SV=1	Q117I5	231	212	237	212	195	259	170	276	173
Daunorubicin resistance ABC transporter ATPase subunit OS=Trichodesmium erythraeum (strain IMS101) GN=Tery_4160 PE=4 SV=1	Q10X58	32	35	31	30	31	31	30	33	29
DEAD/DEAH box helicase-like OS=Trichodesmium erythraeum (strain IMS101) GN=Tery_3683 PE=4 SV=1	REVERSE_Q10YD0	2	0	0	0	0	0	1	0	0
DEAD/DEAH box helicase-like OS=Trichodesmium erythraeum (strain IMS101) GN=Tery_3683 PE=4 SV=1	Q10YD0	0	0	0	0	0	0	0	0	0
DEAD/DEAH box helicase-like OS=Trichodesmium erythraeum (strain IMS101) GN=Tery_3732 PE=3 SV=1	Q10Y86	17	16	15	14	11	17	13	17	11
DegT/DnrJ/EryC1/StrS aminotransferase OS=Trichodesmium erythraeum (strain IMS101) GN=Tery_2261 PE=3 SV=1	Q112T5	0	1	0	0	0	0	0	0	0
DegT/DnrJ/EryC1/StrS aminotransferase OS=Trichodesmium erythraeum (strain IMS101) GN=Tery_2694 PE=3 SV=1	Q111E1	3	3	4	3	2	1	0	2	3
DegT/DnrJ/EryC1/StrS aminotransferase OS=Trichodesmium erythraeum (strain IMS101) GN=Tery_4955 PE=3 SV=1	Q10V55	27	29	26	28	26	23	17	23	25
Deoxyribodipyrimidine photo-lyase type I OS=Trichodesmium erythraeum (strain IMS101) GN=Tery_1113 PE=3 SV=1	Q116U8	3	3	9	3	4	4	1	5	3
Deoxyribodipyrimidine photo-lyase type I OS=Trichodesmium erythraeum (strain IMS101) GN=Tery_4538 PE=3 SV=1	Q10W56	3	6	6	3	3	3	3	4	4
Deoxyribose-phosphate aldolase OS=Trichodesmium erythraeum (strain IMS101) GN=deoC PE=3 SV=1	Q10VZ6	9	12	14	10	8	7	7	10	10
Dephospho-CoA kinase OS=Trichodesmium erythraeum (strain IMS101) GN=coaE PE=3 SV=1	Q119J3	0	1	1	0	0	0	0	0	0
Diaminopimelate epimerase OS=Trichodesmium erythraeum (strain IMS101) GN=dapF PE=1 SV=1	Q116P1	8	8	8	10	10	9	8	11	8
Dihydrolipoamide acetyltransferase component of pyruvate dehydrogenase complex OS=Trichodesmium erythraeum (strain IMS101) GN=Tery_1831 PE=3 SV=1	Q114I7	32	34	37	30	29	29	25	32	26
Dihydrolipoyl dehydrogenase OS=Trichodesmium erythraeum (strain IMS101) GN=Tery_3171 PE=4 SV=1	Q10ZM5	45	45	48	44	41	43	42	47	44
Dihydroorotase OS=Trichodesmium erythraeum (strain IMS101) GN=Tery_2177 PE=3 SV=1	Q113B6	33	32	32	25	33	26	20	30	24
Dihydroorotase OS=Trichodesmium erythraeum (strain IMS101) GN=Tery_2179 PE=4 SV=1	Q113B4	0	2	0	0	2	0	0	1	0
Dihydroorotate dehydrogenase (quinone) OS=Trichodesmium erythraeum (strain IMS101) GN=pyrD PE=3 SV=1	Q113R9	3	2	1	3	2	2	3	2	2
Dihydropteridine reductase OS=Trichodesmium erythraeum (strain IMS101) GN=Tery_0696 PE=4 SV=1	Q118E3	13	16	17	12	11	11	10	13	9
Dihydropteroate synthase OS=Trichodesmium erythraeum (strain IMS101) GN=Tery_0697 PE=4 SV=1	Q118E2	10	12	12	9	9	8	5	11	8
Dihydroxy-acid dehydratase OS=Trichodesmium erythraeum (strain IMS101) GN=ilvD PE=3 SV=1	Q11AD1	32	28	29	29	26	27	23	25	22
DNA gyrase subunit A OS=Trichodesmium erythraeum (strain IMS101) GN=gyrA PE=3 SV=1	Q10X34	18	18	20	20	20	15	13	18	17
DNA gyrase subunit A OS=Trichodesmium erythraeum (strain IMS101) GN=gyrA PE=3 SV=1	REVERSE_Q10X34	0	0	0	0	0	0	0	0	0
DNA gyrase subunit B OS=Trichodesmium erythraeum (strain IMS101) GN=Tery_3961 PE=4 SV=1	Q10XN8	23	26	16	20	19	13	12	23	16
DNA helicase OS=Trichodesmium erythraeum (strain IMS101) GN=Tery_4232 PE=3 SV=1	Q10WZ1	4	2	2	0	4	4	0	3	2
DNA helicase OS=Trichodesmium erythraeum (strain IMS101) GN=Tery_4233 PE=3 SV=1	Q10WZ0	0	0	0	0	0	0	0	0	0
DNA mismatch repair protein MutS OS=Trichodesmium erythraeum (strain IMS101) GN=mutS PE=3 SV=1	Q10YG4	1	0	0	0	2	0	0	0	0
DNA polymerase I OS=Trichodesmium erythraeum (strain IMS101) GN=Tery_0546 PE=4 SV=1	Q118S8	3	2	2	0	1	1	0	1	3
DNA polymerase III subunit beta OS=Trichodesmium erythraeum (strain IMS101) GN=Tery_0008 PE=4 SV=1	Q11AE0	0	0	1	0	0	0	0	0	0
DNA polymerase III, alpha subunit / Intein OS=Trichodesmium erythraeum (strain IMS101) GN=Tery_1905 PE=4 SV=1	Q114B4	0	0	0	0	0	1	0	0	0
DNA repair protein RecN OS=Trichodesmium erythraeum (strain IMS101) GN=Tery_0644 PE=3 SV=1	Q118I9	0	0	0	0	0	0	0	0	0
DNA topoisomerase (ATP-hydrolyzing) OS=Trichodesmium erythraeum (strain IMS101) GN=Tery_1901 PE=3 SV=1	Q114B8	3	1	0	1	2	0	0	1	1
DNA topoisomerase 1 OS=Trichodesmium erythraeum (strain IMS101) GN=topA PE=3 SV=1	Q11AC4	7	10	7	3	5	5	0	7	8
DNA-directed DNA polymerase OS=Trichodesmium erythraeum (strain IMS101) GN=Tery_1889 PE=3 SV=1	Q114C9	0	0	0	0	0	0	0	0	0
DNA-directed RNA polymerase subunit alpha OS=Trichodesmium erythraeum (strain IMS101) GN=rpoA PE=3 SV=2	Q110D1	34	38	34	39	37	33	31	36	32
DNA-directed RNA polymerase subunit beta OS=Trichodesmium erythraeum (strain IMS101) GN=rpoB PE=3 SV=1	Q110H1	61	56	69	57	62	57	40	67	52
DNA-directed RNA polymerase subunit beta' OS=Trichodesmium erythraeum (strain IMS101) GN=rpoC2 PE=3 SV=1	Q110H3	52	59	54	52	56	46	37	54	51
DNA-directed RNA polymerase subunit gamma OS=Trichodesmium erythraeum (strain IMS101) GN=rpoC1 PE=3 SV=1	Q110H2	43	47	42	35	46	42	33	45	31
DNA-directed RNA polymerase subunit omega OS=Trichodesmium erythraeum (strain IMS101) GN=rpoZ PE=3 SV=1	Q10YY8	10	8	8	9	8	10	8	8	9
DRTGG OS=Trichodesmium erythraeum (strain IMS101) GN=Tery_2747 PE=4 SV=1	Q110Z4	13	20	18	14	17	17	11	16	13
DSBA oxidoreductase OS=Trichodesmium erythraeum (strain IMS101) GN=Tery_2607 PE=4 SV=1	Q111M2	8	8	9	9	7	8	2	9	8
DSH-like OS=Trichodesmium erythraeum (strain IMS101) GN=Tery_3461 PE=4 SV=1	Q10YX1	4	2	2	0	3	1	0	1	2
dTDP-4-dehydrorhamnose 3,5-epimerase OS=Trichodesmium erythraeum (strain IMS101) GN=Tery_1346 PE=4 SV=1	Q116B4	5	5	6	5	5	5	4	0	5
dTDP-4-dehydrorhamnose reductase OS=Trichodesmium erythraeum (strain IMS101) GN=Tery_1344 PE=4 SV=1	Q116B5	15	14	14	7	11	10	4	9	12
dTDP-glucose 4,6-dehydratase OS=Trichodesmium erythraeum (strain IMS101) GN=Tery_0957 PE=3 SV=1	Q117H8	9	9	9	7	8	6	3	7	5
Elongation factor 4 OS=Trichodesmium erythraeum (strain IMS101) GN=lepA PE=3 SV=1	Q112D2	5	4	3	4	6	5	4	3	4
Elongation factor P OS=Trichodesmium erythraeum (strain IMS101) GN=efp PE=3 SV=1	Q116D6	13	15	17	19	20	17	11	16	17
Elongation factor Ts OS=Trichodesmium erythraeum (strain IMS101) GN=tsf PE=3 SV=1	Q116Q3	67	65	65	61	59	65	51	70	51
Enolase OS=Trichodesmium erythraeum (strain IMS101) GN=eno PE=3 SV=1	Q110V4	70	73	69	69	68	63	63	73	68
Enoyl-[acyl-carrier-protein] reductase [NADH] OS=Trichodesmium erythraeum (strain IMS101) GN=fabI PE=3 SV=1	Q93DR0	22	29	26	19	23	31	19	35	21
ErfK/YbiS/YcfS/YnhG OS=Trichodesmium erythraeum (strain IMS101) GN=Tery_2124 PE=4 SV=1	Q113G5	0	0	0	0	0	0	0	0	0
Ethanolamine utilization protein EutN/carboxysome structural protein Ccml OS=Trichodesmium erythraeum (strain IMS101) GN=Tery_3850 PE=4 SV=1	Q10XY2	2	0	2	4	3	3	0	5	1
Ethyl tert-butyl ether degradation EthD OS=Trichodesmium erythraeum (strain IMS101) GN=Tery_5021 PE=4 SV=1	Q10UZ1	29	33	37	33	35	42	36	41	34
Exodeoxyribonuclease III OS=Trichodesmium erythraeum (strain IMS101) GN=Tery_3564 PE=4 SV=1	Q10YM6	10	17	16	8	9	11	8	14	13
Exoribonuclease II OS=Trichodesmium erythraeum (strain IMS101) GN=Tery_3730 PE=4 SV=1	Q10Y88	7	7	2	7	8	4	2	7	5
Extracellular ligand-binding receptor OS=Trichodesmium erythraeum (strain IMS101) GN=Tery_0130 PE=4 SV=1	Q11A49	21	21	20	23	21	21	21	23	18
Extracellular ligand-binding receptor OS=Trichodesmium erythraeum (strain IMS101) GN=Tery_0130 PE=4 SV=1	REVERSE_Q11A49	0	0	0	0	0	0	0	0	0
Extracellular ligand-binding receptor OS=Trichodesmium erythraeum (strain IMS101) GN=Tery_2769 PE=4 SV=1	Q110X2	0	0	0	1	0	0	0	0	0
Extracellular solute-binding protein, family 1 OS=Trichodesmium erythraeum (strain IMS101) GN=Tery_2804 PE=4 SV=1	Q110U4	0	0	0	0	0	0	0	0	0
Extracellular solute-binding protein, family 1 OS=Trichodesmium erythraeum (strain IMS101) GN=Tery_2816 PE=4 SV=1	Q110T2	5	6	4	3	6	3	2	4	5
Extracellular solute-binding protein, family 1 OS=Trichodesmium erythraeum (strain IMS101) GN=Tery_3377 PE=4 SV=1	Q10Z45	148	165	121	144	150	154	134	164	124
Extracellular solute-binding protein, family 1 OS=Trichodesmium erythraeum (strain IMS101) GN=Tery_4188 PE=4 SV=1	Q10X32	10	8	12	7	8	6	5	7	6
Extracellular solute-binding protein, family 3 OS=Trichodesmium erythraeum (strain IMS101) GN=Tery_1998 PE=3 SV=1	Q113S7	102	101	103	101	112	105	92	112	99
Extracellular solute-binding protein, family 3 OS=Trichodesmium erythraeum (strain IMS101) GN=Tery_4470 PE=4 SV=1	Q10WB7	0	0	0	0	0	0	0	0	0
Extracellular solute-binding protein, family 3 OS=Trichodesmium erythraeum (strain IMS101) GN=Tery_4514 PE=4 SV=1	Q10W75	7	6	8	5	6	7	2	11	7
Extracellular solute-binding protein, family 5 OS=Trichodesmium erythraeum (strain IMS101) GN=Tery_1920 PE=4 SV=1	Q113Z9	14	16	17	8	13	13	5	14	11
Extracellular solute-binding protein, family 5 OS=Trichodesmium erythraeum (strain IMS101) GN=Tery_3355 PE=4 SV=1	Q10Z67	5	4	2	2	2	4	1	3	2
FAD dependent oxidoreductase OS=Trichodesmium erythraeum (strain IMS101) GN=Tery_0494 PE=4 SV=1	Q118X4	0	1	1	1	0	0	0	0	1
FAD dependent oxidoreductase OS=Trichodesmium erythraeum (strain IMS101) GN=Tery_1793 PE=4 SV=1	Q114M2	1	0	2	0	1	0	2	0	1
FAD dependent oxidoreductase OS=Trichodesmium erythraeum (strain IMS101) GN=Tery_2018 PE=4 SV=1	Q113Q8	0	1	1	1	0	1	0	1	2
FAD dependent oxidoreductase OS=Trichodesmium erythraeum (strain IMS101) GN=Tery_2192 PE=4 SV=1	Q113A2	1	1	2	0	0	0	0	0	0
FAD dependent oxidoreductase OS=Trichodesmium erythraeum (strain IMS101) GN=Tery_3278 PE=4 SV=1	Q10ZD4	0	1	0	0	0	0	0	0	0
FAD linked oxidase-like OS=Trichodesmium erythraeum (strain IMS101) GN=Tery_3682 PE=4 SV=1	Q10YD1	2	0	0	0	1	1	0	0	0
FAD-dependent pyridine nucleotide-disulphide oxidoreductase OS=Trichodesmium erythraeum (strain IMS101) GN=Tery_2062 PE=4 SV=1	Q113M1	34	27	29	27	22	24	21	26	23
FAD-dependent pyridine nucleotide-disulphide oxidoreductase OS=Trichodesmium erythraeum (strain IMS101) GN=Tery_3661 PE=4 SV=1	Q10YF1	18	20	18	16	22	19	8	20	20
Farnesyl-diphosphate synthase OS=Trichodesmium erythraeum (strain IMS101) GN=Tery_4173 PE=3 SV=1	Q10X45	0	0	0	0	0	4	0	0	0
Fatty acid desaturase OS=Trichodesmium erythraeum (strain IMS101) GN=Tery_0142 PE=4 SV=1	Q11A37	0	0	0	0	0	0	0	0	1
Ferredoxin (2Fe-2S) OS=Trichodesmium erythraeum (strain IMS101) GN=Tery_4539 PE=4 SV=1	Q10W55	0	1	1	0	1	1	0	0	1
Ferredoxin OS=Trichodesmium erythraeum (strain IMS101) GN=Tery_4504 PE=4 SV=1	Q10W84	2	2	0	4	0	2	4	4	2
Ferredoxin thioredoxin reductase, alpha chain OS=Trichodesmium erythraeum (strain IMS101) GN=Tery_1949 PE=4 SV=1	Q113X2	0	3	3	0	0	3	0	2	0
Ferredoxin--NADP reductase OS=Trichodesmium erythraeum (strain IMS101) GN=Tery_3658 PE=3 SV=1	Q10YF4	92	84	87	73	84	82	78	92	67
Ferric uptake regulator, Fur family OS=Trichodesmium erythraeum (strain IMS101) GN=Tery_1953 PE=3 SV=1	Q113W8	0	0	0	0	0	0	0	0	0
Ferric uptake regulator, Fur family OS=Trichodesmium erythraeum (strain IMS101) GN=Tery_3404 PE=3 SV=1	Q10Z19	0	0	0	0	0	0	1	0	0
Ferritin and Dps OS=Trichodesmium erythraeum (strain IMS101) GN=Tery_2787 PE=4 SV=1	Q110V6	26	23	17	27	27	27	19	28	15
FeS assembly ATPase SufC OS=Trichodesmium erythraeum (strain IMS101) GN=Tery_4356 PE=4 SV=1	Q10WM6	13	11	10	15	15	13	11	14	16
FeS assembly protein SufD OS=Trichodesmium erythraeum (strain IMS101) GN=Tery_4357 PE=4 SV=1	Q10WM5	1	2	3	5	5	5	3	7	6
FHA domain containing protein OS=Trichodesmium erythraeum (strain IMS101) GN=Tery_0534 PE=4 SV=1	Q118T8	1	1	1	1	1	1	0	2	0
FHA domain containing protein OS=Trichodesmium erythraeum (strain IMS101) GN=Tery_3335 PE=4 SV=1	Q10Z86	4	4	3	2	1	1	2	2	2
Fibronectin-binding A-like OS=Trichodesmium erythraeum (strain IMS101) GN=Tery_2836 PE=4 SV=1	Q110R4	0	0	0	0	0	0	0	0	0
Filamentous haemagglutinin family outer membrane protein OS=Trichodesmium erythraeum (strain IMS101) GN=Tery_0363 PE=4 SV=1	Q119J2	0	0	0	0	0	0	0	0	0
Filamentous haemagglutinin family outer membrane protein OS=Trichodesmium erythraeum (strain IMS101) GN=Tery_1975 PE=4 SV=1	Q113U8	0	0	0	0	2	0	0	0	0
Filamentous haemagglutinin family outer membrane protein OS=Trichodesmium erythraeum (strain IMS101) GN=Tery_3487 PE=4 SV=1	Q10YU7	5	3	0	3	3	1	0	3	1
Filamentous haemagglutinin family outer membrane protein OS=Trichodesmium erythraeum (strain IMS101) GN=Tery_3830 PE=4 SV=1	Q10Y01	0	0	0	0	0	0	0	0	0
Fimbrial assembly OS=Trichodesmium erythraeum (strain IMS101) GN=Tery_1606 PE=4 SV=1	Q115D9	0	0	0	0	0	0	0	0	0
Flavin reductase-like, FMN-binding OS=Trichodesmium erythraeum (strain IMS101) GN=Tery_0302 PE=4 SV=1	Q119P3	12	13	11	6	12	9	14	8	6
Flavin reductase-like, FMN-binding OS=Trichodesmium erythraeum (strain IMS101) GN=Tery_0770 PE=4 SV=1	Q117X8	7	9	10	8	11	12	5	12	11
Flavin reductase-like, FMN-binding OS=Trichodesmium erythraeum (strain IMS101) GN=Tery_1919 PE=4 SV=1	Q114A0	12	13	12	13	12	12	13	15	10
Flavin-containing monooxygenase FMO OS=Trichodesmium erythraeum (strain IMS101) GN=Tery_0516 PE=4 SV=1	Q118V5	0	2	2	1	0	2	0	1	1
Flavodoxin OS=Trichodesmium erythraeum (strain IMS101) GN=Tery_2559 PE=3 SV=1	Q111R5	0	6	5	0	0	5	5	7	3
Fructose-bisphosphate aldolase OS=Trichodesmium erythraeum (strain IMS101) GN=Tery_4099 PE=3 SV=1	Q10XB7	90	76	77	77	80	82	84	85	78
Fumarate hydratase class II OS=Trichodesmium erythraeum (strain IMS101) GN=fumC PE=3 SV=1	Q116C7	0	3	2	4	3	0	0	2	0
GAF sensor hybrid histidine kinase OS=Trichodesmium erythraeum (strain IMS101) GN=Tery_1418 PE=4 SV=1	Q115W0	0	0	0	0	0	0	0	0	0
GAF sensor signal transduction histidine kinase OS=Trichodesmium erythraeum (strain IMS101) GN=Tery_3575 PE=4 SV=1	Q10YL5	7	7	6	10	9	5	2	8	9
Gamma-glutamyl phosphate reductase OS=Trichodesmium erythraeum (strain IMS101) GN=proA PE=3 SV=1	Q112S1	14	13	10	11	13	13	8	10	12
Gamma-glutamyltransferase 2. Threonine peptidase. MEROPS family T03 OS=Trichodesmium erythraeum (strain IMS101) GN=Tery_2633 PE=4 SV=1	Q111J6	0	0	0	0	0	1	0	0	0
Gas vesicle G OS=Trichodesmium erythraeum (strain IMS101) GN=Tery_2338 PE=4 SV=1	Q112L6	0	0	0	0	0	0	0	0	0
Gas vesicle K OS=Trichodesmium erythraeum (strain IMS101) GN=Tery_2332 PE=4 SV=1	Q112M0	0	0	0	0	0	0	0	0	2
Gas vesicle structural protein OS=Trichodesmium erythraeum (strain IMS101) GN=Tery_2330 PE=3 SV=1	Q112M2	0	0	0	0	0	0	1	0	4
Gas vesicle synthesis GvpLGvpF OS=Trichodesmium erythraeum (strain IMS101) GN=Tery_2339 PE=4 SV=1	Q112L5	34	39	35	37	37	37	36	44	42
GatB/Yqey OS=Trichodesmium erythraeum (strain IMS101) GN=Tery_0596 PE=4 SV=1	Q118N4	10	11	8	12	9	11	8	11	7
GCN5-related N-acetyltransferase OS=Trichodesmium erythraeum (strain IMS101) GN=Tery_0901 PE=4 SV=1	Q117M2	0	0	0	0	0	0	0	1	0
GCN5-related N-acetyltransferase OS=Trichodesmium erythraeum (strain IMS101) GN=Tery_1638 PE=4 SV=1	Q115B2	0	0	0	0	1	0	0	0	0
GCN5-related N-acetyltransferase OS=Trichodesmium erythraeum (strain IMS101) GN=Tery_3397 PE=4 SV=1	Q10Z26	7	7	6	7	10	7	4	6	6
GDP-L-fucose synthase OS=Trichodesmium erythraeum (strain IMS101) GN=fcl PE=3 SV=1	Q118X7	15	17	17	12	15	19	14	20	13
GDP-mannose 4,6-dehydratase OS=Trichodesmium erythraeum (strain IMS101) GN=gmd PE=3 SV=1	Q110G5	0	0	0	1	2	0	0	1	2
GDP-mannose 4,6-dehydratase OS=Trichodesmium erythraeum (strain IMS101) GN=gmd PE=3 SV=1	Q118X8	22	22	20	23	23	23	12	25	19
Geranylgeranyl reductase OS=Trichodesmium erythraeum (strain IMS101) GN=Tery_1823 PE=4 SV=1	Q114J4	2	3	5	4	6	5	7	7	8
Geranylgeranyl reductase OS=Trichodesmium erythraeum (strain IMS101) GN=Tery_3777 PE=4 SV=1	Q10Y50	11	12	11	9	7	10	8	11	9
Glucokinase OS=Trichodesmium erythraeum (strain IMS101) GN=Tery_0774 PE=3 SV=1	Q117X6	18	18	18	16	21	12	10	17	16
Glucose sorbosone dehydrogenase OS=Trichodesmium erythraeum (strain IMS101) GN=Tery_4458 PE=4 SV=1	Q10WC9	0	0	0	0	0	0	0	0	0
Glucose-1-phosphate adenylyltransferase OS=Trichodesmium erythraeum (strain IMS101) GN=Tery_4395 PE=3 SV=1	Q10WJ1	87	97	94	86	93	90	85	102	87
Glucose-1-phosphate cytidylyltransferase OS=Trichodesmium erythraeum (strain IMS101) GN=Tery_2260 PE=4 SV=1	Q112T6	0	0	0	0	0	0	0	0	0
Glucose-1-phosphate thymidyltransferase OS=Trichodesmium erythraeum (strain IMS101) GN=Tery_1537 PE=4 SV=1	Q115K6	7	7	10	9	6	11	5	9	10
Glucose-6-phosphate 1-dehydrogenase OS=Trichodesmium erythraeum (strain IMS101) GN=zwf PE=3 SV=1	Q118F3	117	129	136	128	135	124	114	129	125
Glucose-6-phosphate isomerase OS=Trichodesmium erythraeum (strain IMS101) GN=pgi PE=3 SV=1	Q10XI2	142	140	150	137	128	129	126	160	117
Glucose-methanol-choline oxidoreductase OS=Trichodesmium erythraeum (strain IMS101) GN=Tery_0275 PE=4 SV=1	Q119R7	65	57	61	57	53	59	45	67	53
Glutamate 5-kinase OS=Trichodesmium erythraeum (strain IMS101) GN=proB PE=3 SV=1	Q114A6	0	0	2	1	0	0	0	0	0
Glutamate dehydrogenase 1, mitochondrial OS=Bos taurus GN=GLUD1 PE=1 SV=2	REVERSE_P00366	0	0	0	0	0	0	0	0	0
Glutamate dehydrogenase OS=Trichodesmium erythraeum (strain IMS101) GN=Tery_4311 PE=3 SV=1	Q10WR8	16	21	18	22	25	22	15	19	21
Glutamate racemase OS=Trichodesmium erythraeum (strain IMS101) GN=murI PE=3 SV=1	Q11A19	2	2	0	0	0	0	0	2	2
Glutamate synthase (Ferredoxin) OS=Trichodesmium erythraeum (strain IMS101) GN=Tery_0466 PE=4 SV=1	REVERSE_Q119A1	0	0	0	1	0	1	0	0	0
Glutamate synthase (Ferredoxin) OS=Trichodesmium erythraeum (strain IMS101) GN=Tery_0466 PE=4 SV=1	Q119A1	24	23	19	24	25	24	16	29	25
Glutamate--tRNA ligase OS=Trichodesmium erythraeum (strain IMS101) GN=gltX PE=3 SV=1	Q119Z5	16	16	11	15	15	15	10	20	14
Glutamate-1-semialdehyde 2,1-aminomutase OS=Trichodesmium erythraeum (strain IMS101) GN=hemL PE=3 SV=1	Q110Z9	50	58	52	53	54	57	49	57	56
Glutamine--fructose-6-phosphate aminotransferase [isomerizing] OS=Trichodesmium erythraeum (strain IMS101) GN=glmS PE=3 SV=1	Q119B0	0	0	0	0	0	0	0	0	0
Glutamyl-tRNA reductase OS=Trichodesmium erythraeum (strain IMS101) GN=hemA PE=3 SV=1	Q117I4	1	3	0	0	1	3	2	1	0
Glutamyl-tRNA(Gln) amidotransferase subunit A OS=Trichodesmium erythraeum (strain IMS101) GN=gatA PE=3 SV=1	Q113L8	38	43	43	35	37	36	35	36	38
Glutaredoxin 2 OS=Trichodesmium erythraeum (strain IMS101) GN=Tery_4152 PE=4 SV=1	Q10X65	1	1	0	0	1	0	0	1	1
Glutaredoxin 3 OS=Trichodesmium erythraeum (strain IMS101) GN=Tery_4078 PE=4 SV=1	Q10XD7	4	5	5	4	4	4	3	4	4
Glutaredoxin 3 OS=Trichodesmium erythraeum (strain IMS101) GN=Tery_4207 PE=4 SV=1	Q10X15	0	3	0	0	0	3	0	0	0
Glutaredoxin OS=Trichodesmium erythraeum (strain IMS101) GN=Tery_0356 PE=4 SV=1	Q119J9	2	0	0	3	0	1	0	2	2
Glutaredoxin OS=Trichodesmium erythraeum (strain IMS101) GN=Tery_0677 PE=3 SV=1	Q118G0	3	3	4	3	3	5	3	3	3
Glutathione S-transferase-like OS=Trichodesmium erythraeum (strain IMS101) GN=Tery_2440 PE=4 SV=1	Q112B9	19	19	16	22	19	21	16	22	18
Glutathione S-transferase-like OS=Trichodesmium erythraeum (strain IMS101) GN=Tery_2440 PE=4 SV=1	REVERSE_Q112B9	0	0	0	0	0	0	0	0	0
Glutathione S-transferase-like OS=Trichodesmium erythraeum (strain IMS101) GN=Tery_2639 PE=4 SV=1	Q111J0	0	1	1	0	0	0	0	0	0
Glutathione S-transferase-like OS=Trichodesmium erythraeum (strain IMS101) GN=Tery_4511 PE=4 SV=1	Q10W78	79	81	79	72	66	77	67	85	64
Glutathione synthetase OS=Trichodesmium erythraeum (strain IMS101) GN=gshB PE=3 SV=1	Q10X16	24	17	22	20	16	12	19	27	16
Glyceraldehyde-3-phosphate dehydrogenase OS=Trichodesmium erythraeum (strain IMS101) GN=Tery_2881 PE=3 SV=1	Q110M1	32	33	38	32	30	37	29	39	33
Glycerol kinase OS=Trichodesmium erythraeum (strain IMS101) GN=glpK PE=3 SV=1	Q10Y19	4	3	2	3	5	3	3	4	1
Glycine amidinotransferase OS=Trichodesmium erythraeum (strain IMS101) GN=Tery_3130 PE=4 SV=1	Q10ZR4	12	12	12	8	11	12	11	9	10
Glycine betaine/L-proline ABC transporter, ATPase subunit OS=Trichodesmium erythraeum (strain IMS101) GN=Tery_4109 PE=4 SV=1	REVERSE_Q10XA7	2	0	0	0	0	0	0	0	0
Glycine betaine/L-proline ABC transporter, ATPase subunit OS=Trichodesmium erythraeum (strain IMS101) GN=Tery_4109 PE=4 SV=1	Q10XA7	19	17	17	13	19	14	12	17	17
Glycine cleavage system H protein OS=Trichodesmium erythraeum (strain IMS101) GN=gcvH PE=3 SV=1	Q10UY0	24	24	19	23	22	22	23	28	24
Glycine cleavage T protein (Aminomethyl transferase) OS=Trichodesmium erythraeum (strain IMS101) GN=Tery_4696 PE=3 SV=1	Q10VR5	0	3	2	2	0	2	0	4	0
Glycine dehydrogenase (decarboxylating) OS=Trichodesmium erythraeum (strain IMS101) GN=gcvP PE=3 SV=1	Q10UY1	2	4	3	3	4	1	1	3	3
Glycine--tRNA ligase alpha subunit OS=Trichodesmium erythraeum (strain IMS101) GN=glyQ PE=3 SV=1	Q10XW9	0	0	2	0	1	0	0	0	1
Glycine--tRNA ligase beta subunit OS=Trichodesmium erythraeum (strain IMS101) GN=glyS PE=3 SV=1	Q10WA6	19	23	25	21	18	15	11	18	18
Glycogen debranching enzyme GlgX OS=Trichodesmium erythraeum (strain IMS101) GN=Tery_1895 PE=3 SV=1	Q114C4	0	3	3	1	0	4	2	4	3
Glycogen debranching enzyme GlgX OS=Trichodesmium erythraeum (strain IMS101) GN=Tery_3430 PE=3 SV=1	Q10Z01	5	4	5	3	5	2	4	2	4
Glycogen debranching enzyme GlgX OS=Trichodesmium erythraeum (strain IMS101) GN=Tery_5016 PE=3 SV=1	Q10UZ6	15	17	11	19	18	16	6	18	18
Glycogen debranching enzyme, putative OS=Trichodesmium erythraeum (strain IMS101) GN=Tery_2589 PE=4 SV=1	Q111N8	20	21	16	13	17	14	8	20	20
Glycogen synthase OS=Trichodesmium erythraeum (strain IMS101) GN=glgA PE=3 SV=1	Q113E3	52	47	46	45	49	41	36	55	44
Glycogen synthase OS=Trichodesmium erythraeum (strain IMS101) GN=glgA PE=3 SV=1	REVERSE_Q113E3	0	1	0	0	0	0	0	0	0
Glycoside hydrolase, family 57 OS=Trichodesmium erythraeum (strain IMS101) GN=Tery_0045 PE=3 SV=1	Q11AB3	7	10	7	9	11	6	6	12	8
Glycoside hydrolase, family 57 OS=Trichodesmium erythraeum (strain IMS101) GN=Tery_2345 PE=3 SV=1	Q112K9	5	5	8	2	4	4	1	2	2
Glycosyl transferase, family 2 OS=Trichodesmium erythraeum (strain IMS101) GN=Tery_1340 PE=4 SV=1	Q116B9	2	0	0	0	0	0	0	0	0
Glycosyl transferase, family 2 OS=Trichodesmium erythraeum (strain IMS101) GN=Tery_1492 PE=4 SV=1	Q115P5	6	7	10	5	9	7	1	7	9
Glycosyl transferase, family 2 OS=Trichodesmium erythraeum (strain IMS101) GN=Tery_2268 PE=4 SV=1	Q112S8	0	0	0	0	0	0	0	0	1
Glycosyl transferase, family 2 OS=Trichodesmium erythraeum (strain IMS101) GN=Tery_2707 PE=4 SV=1	Q111C8	32	42	29	45	35	40	21	37	38
Glycosyl transferase, family 2 OS=Trichodesmium erythraeum (strain IMS101) GN=Tery_2707 PE=4 SV=1	REVERSE_Q111C8	0	0	0	0	0	0	0	0	0
Glycosyl transferase, family 2 OS=Trichodesmium erythraeum (strain IMS101) GN=Tery_2749 PE=4 SV=1	Q110Z2	0	0	0	0	0	0	0	0	0
Glycosyl transferase, family 2 OS=Trichodesmium erythraeum (strain IMS101) GN=Tery_3238 PE=4 SV=1	Q10ZH1	1	1	4	0	1	0	1	0	2
Glycosyl transferase, family 2 OS=Trichodesmium erythraeum (strain IMS101) GN=Tery_3371 PE=4 SV=1	Q10Z51	1	1	3	1	4	0	1	1	1
Glycosyl transferase, family 2 OS=Trichodesmium erythraeum (strain IMS101) GN=Tery_3434 PE=4 SV=1	Q10YZ7	9	9	10	9	10	11	8	12	11
Glycosyl transferase, family 2 OS=Trichodesmium erythraeum (strain IMS101) GN=Tery_4954 PE=4 SV=1	Q10V56	0	0	0	0	0	0	0	0	0
Glycosyl transferase, group 1 OS=Trichodesmium erythraeum (strain IMS101) GN=Tery_0146 PE=4 SV=1	Q11A33	0	0	0	1	0	1	0	2	0
Glycosyl transferase, group 1 OS=Trichodesmium erythraeum (strain IMS101) GN=Tery_1099 PE=4 SV=1	Q116W0	1	3	1	0	3	2	0	4	4
Glycosyl transferase, group 1 OS=Trichodesmium erythraeum (strain IMS101) GN=Tery_1135 PE=4 SV=1	Q116S7	0	3	3	0	1	0	0	0	0
Glycosyl transferase, group 1 OS=Trichodesmium erythraeum (strain IMS101) GN=Tery_1356 PE=4 SV=1	Q116A5	5	7	6	7	7	7	5	6	9
Glycosyl transferase, group 1 OS=Trichodesmium erythraeum (strain IMS101) GN=Tery_1737 PE=4 SV=1	Q114S6	0	0	0	0	0	0	0	1	0
Glycosyl transferase, group 1 OS=Trichodesmium erythraeum (strain IMS101) GN=Tery_2067 PE=4 SV=1	Q113L6	0	0	3	0	0	0	0	0	0
Glycosyl transferase, group 1 OS=Trichodesmium erythraeum (strain IMS101) GN=Tery_2168 PE=4 SV=1	Q113C3	15	12	14	14	11	12	6	12	10
Glycosyl transferase, group 1 OS=Trichodesmium erythraeum (strain IMS101) GN=Tery_2524 PE=4 SV=1	Q111U5	8	8	11	6	6	5	3	7	9
Glycosyl transferase, group 1 OS=Trichodesmium erythraeum (strain IMS101) GN=Tery_3818 PE=4 SV=1	Q10Y12	0	0	0	1	0	1	0	2	2
Glycosyl transferase, group 1 OS=Trichodesmium erythraeum (strain IMS101) GN=Tery_4043 PE=4 SV=1	Q10XG7	1	1	2	0	0	0	0	1	0
Glycosyl transferase, group 1 OS=Trichodesmium erythraeum (strain IMS101) GN=Tery_4124 PE=4 SV=1	REVERSE_Q10X92	0	0	0	0	0	0	0	0	0
Glycosyltransferase-like OS=Trichodesmium erythraeum (strain IMS101) GN=Tery_0631 PE=4 SV=1	Q118K1	2	0	3	0	1	0	1	0	0
Glyoxalase/bleomycin resistance protein/dioxygenase OS=Trichodesmium erythraeum (strain IMS101) GN=Tery_0420 PE=4 SV=1	Q119E2	14	14	14	10	9	8	12	10	10
GMP synthase [glutamine-hydrolyzing] OS=Trichodesmium erythraeum (strain IMS101) GN=guaA PE=3 SV=1	Q117L8	2	2	1	1	3	2	0	3	1
GTP cyclohydrolase 1 OS=Trichodesmium erythraeum (strain IMS101) GN=folE PE=3 SV=1	Q117H2	0	1	2	0	0	0	1	0	0
GTP cyclohydrolase 1 OS=Trichodesmium erythraeum (strain IMS101) GN=folE PE=3 SV=1	Q10VY5	6	8	6	9	10	9	5	10	10
GTP-binding protein, HSR1-related OS=Trichodesmium erythraeum (strain IMS101) GN=Tery_1653 PE=4 SV=1	REVERSE_Q114Z8	0	0	0	0	0	0	0	0	0
GTPase Der OS=Trichodesmium erythraeum (strain IMS101) GN=der PE=3 SV=1	Q119L7	4	6	6	3	3	3	1	4	5
GTPase Der OS=Trichodesmium erythraeum (strain IMS101) GN=der PE=3 SV=1	REVERSE_Q119L7	0	0	1	0	0	0	0	0	0
GTPase Era OS=Trichodesmium erythraeum (strain IMS101) GN=era PE=3 SV=1	Q110F4	0	0	0	0	0	0	0	0	0
GTPase Obg OS=Trichodesmium erythraeum (strain IMS101) GN=obg PE=3 SV=1	Q10XA1	2	5	3	0	0	4	0	5	8
GUN4-like OS=Trichodesmium erythraeum (strain IMS101) GN=Tery_0174 PE=4 SV=1	Q11A08	3	4	4	4	6	5	2	10	8
GUN4-like OS=Trichodesmium erythraeum (strain IMS101) GN=Tery_3036 PE=4 SV=1	Q10ZY7	0	0	0	0	0	0	0	0	3
GUN4-like OS=Trichodesmium erythraeum (strain IMS101) GN=Tery_3036 PE=4 SV=1	REVERSE_Q10ZY7	0	0	0	0	0	0	0	0	0
GUN4-like OS=Trichodesmium erythraeum (strain IMS101) GN=Tery_3350 PE=4 SV=1	Q10Z72	0	0	0	0	0	0	0	2	0
HAD-superfamily hydrolase, subfamily IA, variant 3 OS=Trichodesmium erythraeum (strain IMS101) GN=Tery_1995 PE=4 SV=1	Q113S9	0	0	2	0	0	0	0	0	0
HAD-superfamily hydrolase, subfamily IA, variant 3 OS=Trichodesmium erythraeum (strain IMS101) GN=Tery_2465 PE=4 SV=1	Q111Z8	1	0	0	0	0	1	0	0	0
HAD-superfamily hydrolase, subfamily IA, variant 3 OS=Trichodesmium erythraeum (strain IMS101) GN=Tery_4648 PE=4 SV=1	Q10VV6	1	2	2	2	2	1	1	3	2
HAD-superfamily hydrolase, subfamily IIB OS=Trichodesmium erythraeum (strain IMS101) GN=Tery_3874 PE=4 SV=1	Q10XW2	0	0	0	0	0	0	0	0	0
Haloacid dehalogenase-like hydrolase OS=Trichodesmium erythraeum (strain IMS101) GN=Tery_2614 PE=4 SV=1	Q111L5	0	0	6	4	5	3	0	0	0
HEAT domain containing protein OS=Trichodesmium erythraeum (strain IMS101) GN=Tery_0057 PE=4 SV=1	REVERSE_Q11AA4	0	0	0	0	0	0	0	0	0
HEAT domain containing protein OS=Trichodesmium erythraeum (strain IMS101) GN=Tery_0826 PE=4 SV=1	Q117T4	1	0	0	0	0	0	0	0	1
HEAT domain containing protein OS=Trichodesmium erythraeum (strain IMS101) GN=Tery_4484 PE=4 SV=1	Q10WA4	1	1	1	1	2	1	2	1	0
Heat shock protein 70 OS=Trichodesmium erythraeum (strain IMS101) GN=Tery_0893 PE=3 SV=1	Q117N0	0	0	0	1	1	0	0	1	1
Heat shock protein DnaJ-like OS=Trichodesmium erythraeum (strain IMS101) GN=Tery_0757 PE=4 SV=1	Q117Y9	2	3	3	0	1	1	0	0	1
Heat shock protein DnaJ-like OS=Trichodesmium erythraeum (strain IMS101) GN=Tery_4397 PE=4 SV=1	Q10WI9	0	2	0	1	0	0	0	1	2
Heat shock protein DnaJ-like OS=Trichodesmium erythraeum (strain IMS101) GN=Tery_5067 PE=4 SV=1	Q10UV3	2	4	2	1	0	3	0	2	3
Heavy metal transport/detoxification protein OS=Trichodesmium erythraeum (strain IMS101) GN=Tery_4881 PE=4 SV=1	Q10VB4	8	8	8	7	8	8	4	8	7
Helicase-like OS=Trichodesmium erythraeum (strain IMS101) GN=Tery_0012 PE=4 SV=1	REVERSE_Q11AD7	0	0	0	0	0	0	0	0	0
Heme utilization protein HuvX OS=Trichodesmium erythraeum (strain IMS101) GN=Tery_2539 PE=4 SV=1	Q111T3	7	9	8	7	9	8	8	9	8
Hemolysin-type calcium-binding region OS=Trichodesmium erythraeum (strain IMS101) GN=Tery_0405 PE=4 SV=1	Q119F4	0	4	0	2	2	1	5	2	1
Hemolysin-type calcium-binding region OS=Trichodesmium erythraeum (strain IMS101) GN=Tery_1355 PE=4 SV=1	Q116A6	69	65	69	69	77	70	55	65	60
Hemolysin-type calcium-binding region OS=Trichodesmium erythraeum (strain IMS101) GN=Tery_1450 PE=4 SV=1	Q115T4	25	28	27	27	29	27	24	35	29
Hemolysin-type calcium-binding region OS=Trichodesmium erythraeum (strain IMS101) GN=Tery_2710 PE=4 SV=1	Q111C6	17	19	15	14	18	15	12	16	16
Hemolysin-type calcium-binding region OS=Trichodesmium erythraeum (strain IMS101) GN=Tery_3470 PE=4 SV=1	Q10YW4	12	14	10	12	20	17	6	19	13
Hemolysin-type calcium-binding region OS=Trichodesmium erythraeum (strain IMS101) GN=Tery_3664 PE=4 SV=1	Q10YE8	1	2	1	0	1	0	0	1	0
Hemolysin-type calcium-binding region OS=Trichodesmium erythraeum (strain IMS101) GN=Tery_4191 PE=4 SV=1	Q10X29	0	0	0	1	0	0	0	0	0
HesA OS=Trichodesmium erythraeum (strain IMS101) GN=hesA PE=4 SV=1	Q9KJL3	7	12	7	6	8	8	4	9	8
HesB OS=Trichodesmium erythraeum (strain IMS101) GN=hesB PE=3 SV=1	Q9KJL2	9	9	13	8	8	9	7	7	7
Heterocyst differentiation control protein OS=Trichodesmium erythraeum (strain IMS101) GN=hetR PE=3 SV=2	Q93CE9	1	0	0	1	0	0	0	0	0
Heterocyst differentiation protein OS=Trichodesmium erythraeum (strain IMS101) GN=Tery_4218 PE=4 SV=1	Q10X05	0	0	1	2	0	0	0	1	0
HI0933-like protein OS=Trichodesmium erythraeum (strain IMS101) GN=Tery_4574 PE=4 SV=1	Q10W24	2	0	1	0	2	0	0	0	0
Histidine biosynthesis bifunctional protein HisIE OS=Trichodesmium erythraeum (strain IMS101) GN=hisI PE=3 SV=1	Q111A0	6	6	4	5	7	5	5	7	6
Histidine kinase OS=Trichodesmium erythraeum (strain IMS101) GN=Tery_0943 PE=4 SV=1	Q117I8	0	0	0	0	0	0	0	0	0
Histidine kinase OS=Trichodesmium erythraeum (strain IMS101) GN=Tery_1644 PE=4 SV=1	Q115A6	1	0	3	0	2	0	1	0	0
Histidine kinase OS=Trichodesmium erythraeum (strain IMS101) GN=Tery_2729 PE=4 SV=1	Q111B1	0	0	0	3	0	0	0	0	0
Histidine kinase OS=Trichodesmium erythraeum (strain IMS101) GN=Tery_3912 PE=4 SV=1	Q10XT0	0	0	0	0	0	0	0	0	0
Histidine triad (HIT) protein OS=Trichodesmium erythraeum (strain IMS101) GN=Tery_4113 PE=4 SV=1	REVERSE_Q10XA3	0	0	0	0	0	0	0	0	0
Histidine triad (HIT) protein OS=Trichodesmium erythraeum (strain IMS101) GN=Tery_4764 PE=4 SV=1	Q10VK6	5	5	5	6	7	7	4	10	4
Histidine--tRNA ligase OS=Trichodesmium erythraeum (strain IMS101) GN=hisS PE=3 SV=1	Q117Y8	41	47	43	30	40	35	30	38	40
Histidine--tRNA ligase OS=Trichodesmium erythraeum (strain IMS101) GN=hisS PE=3 SV=1	Q118Q2	3	8	3	6	8	6	3	5	8
Histidinol-phosphate aminotransferase OS=Trichodesmium erythraeum (strain IMS101) GN=hisC PE=3 SV=1	Q10VS0	2	6	3	3	3	1	0	2	0
Holliday junction ATP-dependent DNA helicase RuvB OS=Trichodesmium erythraeum (strain IMS101) GN=ruvB PE=3 SV=1	Q115Z7	0	0	0	0	0	0	0	0	0
Homoaconitate hydratase family protein OS=Trichodesmium erythraeum (strain IMS101) GN=Tery_2728 PE=4 SV=1	Q111B2	6	3	2	1	3	3	1	3	2
Homoserine dehydrogenase OS=Trichodesmium erythraeum (strain IMS101) GN=Tery_4567 PE=3 SV=1	Q10W31	23	22	24	17	17	16	18	19	20
Homoserine kinase OS=Trichodesmium erythraeum (strain IMS101) GN=thrB PE=3 SV=1	Q117D0	4	4	5	0	4	3	3	0	0
HpcH/HpaI aldolase OS=Trichodesmium erythraeum (strain IMS101) GN=Tery_2821 PE=3 SV=1	Q110S7	3	3	7	3	4	4	1	4	3
Hydrogen:quinone oxidoreductase OS=Trichodesmium erythraeum (strain IMS101) GN=Tery_3368 PE=4 SV=1	Q10Z54	0	2	0	1	3	3	0	3	0
Hydrogenase accessory protein HypB OS=Trichodesmium erythraeum (strain IMS101) GN=Tery_0802 PE=4 SV=1	Q117V5	3	2	3	2	0	1	0	0	1
Hydrogenase expression/formation protein HypE OS=Trichodesmium erythraeum (strain IMS101) GN=Tery_0797 PE=4 SV=1	Q117W0	4	4	4	4	3	3	0	3	4
Hydrogenase maturation protease OS=Trichodesmium erythraeum (strain IMS101) GN=Tery_3367 PE=4 SV=1	Q10Z55	0	0	0	0	0	0	0	0	0
Hydrogenobyrinic acid a,c-diamide cobaltochelatase OS=Trichodesmium erythraeum (strain IMS101) GN=Tery_0866 PE=4 SV=1	REVERSE_Q117Q2	0	0	0	0	0	0	0	0	0
Hydrogenobyrinic acid a,c-diamide cobaltochelatase OS=Trichodesmium erythraeum (strain IMS101) GN=Tery_3224 PE=4 SV=1	Q10ZI2	0	0	0	0	0	0	0	0	0
Hydroxyneurosporene-O-methyltransferase OS=Trichodesmium erythraeum (strain IMS101) GN=Tery_2966 PE=4 SV=1	Q110F0	11	11	10	6	9	6	7	8	6
Imidazole glycerol phosphate synthase subunit HisH OS=Trichodesmium erythraeum (strain IMS101) GN=hisH PE=3 SV=1	Q113E7	1	1	0	2	0	1	0	1	1
IMP dehydrogenase OS=Trichodesmium erythraeum (strain IMS101) GN=Tery_3304 PE=4 SV=1	Q10ZB4	11	9	13	12	11	12	12	14	11
IMP dehydrogenase subunit OS=Trichodesmium erythraeum (strain IMS101) GN=Tery_3306 PE=4 SV=1	Q10ZB2	18	17	18	18	19	19	13	19	16
Indole-3-glycerol phosphate synthase OS=Trichodesmium erythraeum (strain IMS101) GN=trpC PE=3 SV=1	Q10ZM7	0	0	0	0	0	0	0	2	0
Inorganic pyrophosphatase OS=Trichodesmium erythraeum (strain IMS101) GN=ppa PE=3 SV=1	Q115M1	31	36	28	35	38	36	35	42	35
Inosine/uridine-preferring nucleoside hydrolase OS=Trichodesmium erythraeum (strain IMS101) GN=Tery_3465 PE=4 SV=1	Q10YW8	4	4	6	7	7	5	3	6	3
Inositol monophosphatase OS=Trichodesmium erythraeum (strain IMS101) GN=Tery_4756 PE=4 SV=1	Q10VL4	6	4	4	5	7	3	3	3	1
Iron-regulated ABC transporter membrane component SufB OS=Trichodesmium erythraeum (strain IMS101) GN=Tery_4355 PE=4 SV=1	Q10WM7	9	10	9	10	12	8	7	10	10
Isocitrate dehydrogenase [NADP] OS=Trichodesmium erythraeum (strain IMS101) GN=Tery_0071 PE=4 SV=1	Q11A94	31	28	29	26	36	32	26	39	27
Isoleucine--tRNA ligase OS=Trichodesmium erythraeum (strain IMS101) GN=ileS PE=3 SV=1	Q10YK7	19	18	25	14	18	21	13	17	21
Isoleucine--tRNA ligase OS=Trichodesmium erythraeum (strain IMS101) GN=ileS PE=3 SV=1	REVERSE_Q10YK7	1	0	0	0	0	0	0	0	0
Isopentenyl-diphosphate delta-isomerase OS=Trichodesmium erythraeum (strain IMS101) GN=fni PE=3 SV=1	Q115F6	0	0	0	3	0	0	0	0	0
KaiA OS=Trichodesmium erythraeum (strain IMS101) GN=Tery_3803 PE=4 SV=1	Q10Y26	0	1	1	0	1	0	0	0	0
Keratin, type I cuticular Ha4 OS=Homo sapiens GN=KRT34 PE=2 SV=2	O76011	0	0	0	0	0	0	3	0	0
Keratin, type I cuticular Ha5 OS=Homo sapiens GN=KRT35 PE=2 SV=5	Q92764	0	0	0	0	0	0	0	0	0
Keratin, type I cuticular Ha6 OS=Homo sapiens GN=KRT36 PE=1 SV=1	O76013	0	0	0	0	0	0	0	0	0
Keratin, type I cytoskeletal 15 OS=Ovis aries GN=KRT15 PE=2 SV=1	O77727	0	0	3	0	5	0	0	0	6
Keratin, type I cytoskeletal 9 OS=Homo sapiens GN=KRT9 PE=1 SV=3	P35527	16	31	19	29	11	39	12	14	4
Keratin, type I cytoskeletal 9 OS=Homo sapiens GN=KRT9 PE=1 SV=3	REVERSE_P35527	0	0	0	0	0	0	0	0	0
Keratin, type II cuticular Hb4 OS=Homo sapiens GN=KRT84 PE=2 SV=2	Q9NSB2	0	1	0	0	0	0	0	0	1
Keratin, type II cytoskeletal 2 epidermal OS=Homo sapiens GN=KRT2 PE=1 SV=2	P35908	13	39	11	25	15	36	3	11	19
Ketol-acid reductoisomerase (NADP(+)) OS=Trichodesmium erythraeum (strain IMS101) GN=ilvC PE=3 SV=1	Q10WP7	83	82	80	91	92	87	78	92	84
KWG Leptospira OS=Trichodesmium erythraeum (strain IMS101) GN=Tery_2057 PE=4 SV=1	Q113M6	3	6	5	5	4	4	1	6	6
L-glutamine synthetase OS=Trichodesmium erythraeum (strain IMS101) GN=Tery_4681 PE=3 SV=1	Q10VS8	4	8	7	3	8	3	1	7	4
L-proline dehydrogenase / delta-1-pyrroline-5-carboxylate dehydrogenase OS=Trichodesmium erythraeum (strain IMS101) GN=Tery_3446 PE=3 SV=1	REVERSE_Q10YY5	1	2	1	1	2	0	0	2	1
L-threonine aldolase OS=Trichodesmium erythraeum (strain IMS101) GN=Tery_1646 PE=3 SV=1	Q115A4	1	0	2	2	0	0	0	0	0
Laccase domain protein OS=Trichodesmium erythraeum (strain IMS101) GN=Tery_3353 PE=3 SV=1	Q10Z69	0	1	0	0	0	0	0	0	0
Leucine--tRNA ligase OS=Trichodesmium erythraeum (strain IMS101) GN=leuS PE=3 SV=1	Q114V5	5	9	5	9	12	7	9	11	10
Light-independent protochlorophyllide reductase subunit B OS=Trichodesmium erythraeum (strain IMS101) GN=chlB PE=3 SV=1	Q10Y17	0	0	0	0	0	0	0	0	1
Light-independent protochlorophyllide reductase subunit N OS=Trichodesmium erythraeum (strain IMS101) GN=chlN PE=3 SV=1	Q115L3	0	4	1	2	3	2	2	3	5
Lipase OS=Trichodesmium erythraeum (strain IMS101) GN=Tery_3878 PE=4 SV=1	Q10XV8	38	42	37	39	42	40	30	45	35
Lipase, class 3 OS=Trichodesmium erythraeum (strain IMS101) GN=Tery_1685 PE=4 SV=1	Q114W8	21	25	19	19	22	18	15	21	19
Lipoate-protein ligase OS=Trichodesmium erythraeum (strain IMS101) GN=Tery_2331 PE=4 SV=1	Q112M1	12	10	14	13	15	14	12	11	13
Lipolytic enzyme, G-D-S-L OS=Trichodesmium erythraeum (strain IMS101) GN=Tery_3229 PE=4 SV=1	Q10ZH8	2	2	0	0	2	0	0	3	0
LL-diaminopimelate aminotransferase OS=Trichodesmium erythraeum (strain IMS101) GN=dapL PE=3 SV=1	Q10ZC3	69	70	79	65	70	69	61	77	65
Lysine--tRNA ligase OS=Trichodesmium erythraeum (strain IMS101) GN=lysS PE=3 SV=1	Q112I8	22	29	24	20	21	18	13	24	21
Lysozyme C OS=Homo sapiens GN=LYZ PE=1 SV=1	P61626	0	0	0	0	0	0	0	1	0
Lysozyme OS=Trichodesmium erythraeum (strain IMS101) GN=Tery_4178 PE=3 SV=1	Q10X40	3	5	3	4	4	5	4	4	6
Lysozyme OS=Trichodesmium erythraeum (strain IMS101) GN=Tery_4180 PE=3 SV=1	REVERSE_Q10X39	0	0	0	0	0	0	0	0	0
Lytic transglycosylase, catalytic OS=Trichodesmium erythraeum (strain IMS101) GN=Tery_2092 PE=4 SV=1	REVERSE_Q113J3	1	0	0	0	0	0	0	1	0
Lytic transglycosylase, catalytic OS=Trichodesmium erythraeum (strain IMS101) GN=Tery_2092 PE=4 SV=1	Q113J3	0	0	0	0	0	0	0	0	0
Maf-like protein Tery_0163 OS=Trichodesmium erythraeum (strain IMS101) GN=Tery_0163 PE=3 SV=1	Q11A17	6	8	4	5	7	3	2	3	7
Magnesium protoporphyrin O-methyltransferase OS=Trichodesmium erythraeum (strain IMS101) GN=Tery_4469 PE=4 SV=1	Q10WB8	16	19	19	16	22	18	13	15	16
Magnesium-protoporphyrin IX monomethyl ester [oxidative] cyclase OS=Trichodesmium erythraeum (strain IMS101) GN=acsF PE=3 SV=1	Q118B4	0	0	0	0	0	0	0	0	0
Malate dehydrogenase (Oxaloacetate decarboxylating) OS=Trichodesmium erythraeum (strain IMS101) GN=Tery_3983 PE=4 SV=1	Q10XL6	30	34	25	27	31	27	26	35	23
Male sterility-like OS=Trichodesmium erythraeum (strain IMS101) GN=Tery_4583 PE=4 SV=1	Q10W15	1	1	0	0	0	0	0	1	0
Mannose-6-phosphate isomerase OS=Trichodesmium erythraeum (strain IMS101) GN=Tery_0471 PE=4 SV=1	Q118Z7	0	1	0	1	1	0	0	0	0
McrBC 5-methylcytosine restriction system component-like OS=Trichodesmium erythraeum (strain IMS101) GN=Tery_3582 PE=4 SV=1	Q10YL1	0	0	0	0	0	0	0	0	0
Metallophosphoesterase OS=Trichodesmium erythraeum (strain IMS101) GN=Tery_0082 PE=4 SV=1	Q11A84	2	3	2	2	2	3	0	4	0
Methionine aminopeptidase OS=Trichodesmium erythraeum (strain IMS101) GN=map PE=3 SV=1	Q119F6	4	5	5	6	7	5	5	6	4
Methionine synthase (B12-dependent) OS=Trichodesmium erythraeum (strain IMS101) GN=Tery_1073 PE=4 SV=1	Q116Y2	7	9	5	8	9	8	4	7	8
Methionine synthase (B12-dependent) OS=Trichodesmium erythraeum (strain IMS101) GN=Tery_2492 PE=4 SV=1	Q111X5	1	0	0	0	0	0	0	0	1
Methionine--tRNA ligase OS=Trichodesmium erythraeum (strain IMS101) GN=metG PE=3 SV=1	Q114L1	15	12	17	10	11	10	5	10	12
Methionyl-tRNA formyltransferase OS=Trichodesmium erythraeum (strain IMS101) GN=fmt PE=3 SV=1	Q114P5	4	5	6	5	7	4	2	7	6
Methyl-accepting chemotaxis sensory transducer OS=Trichodesmium erythraeum (strain IMS101) GN=Tery_3246 PE=4 SV=1	Q10ZG4	0	0	0	0	2	0	0	0	0
Methyl-accepting chemotaxis sensory transducer OS=Trichodesmium erythraeum (strain IMS101) GN=Tery_3246 PE=4 SV=1	REVERSE_Q10ZG4	0	0	0	0	0	0	0	0	0
Methyl-accepting chemotaxis sensory transducer with GAF sensor OS=Trichodesmium erythraeum (strain IMS101) GN=Tery_0715 PE=4 SV=1	REVERSE_Q118C6	0	0	0	2	0	0	0	0	0
Methyl-accepting chemotaxis sensory transducer with GAF sensor OS=Trichodesmium erythraeum (strain IMS101) GN=Tery_0715 PE=4 SV=1	Q118C6	19	26	28	23	25	21	16	29	25
Methylthioribose-1-phosphate isomerase OS=Trichodesmium erythraeum (strain IMS101) GN=mtnA PE=3 SV=1	Q113K5	0	1	1	0	0	1	0	0	0
Methyltransferase FkbM family OS=Trichodesmium erythraeum (strain IMS101) GN=Tery_1251 PE=4 SV=1	Q116H8	26	30	21	27	27	28	25	29	20
Methyltransferase FkbM family OS=Trichodesmium erythraeum (strain IMS101) GN=Tery_1754 PE=4 SV=1	Q114R0	0	0	0	0	0	0	0	0	0
Methyltransferase FkbM family OS=Trichodesmium erythraeum (strain IMS101) GN=Tery_2169 PE=4 SV=1	Q113C2	0	0	0	1	1	0	0	0	0
Methyltransferase FkbM family OS=Trichodesmium erythraeum (strain IMS101) GN=Tery_2946 PE=4 SV=1	Q110G4	1	3	1	2	3	3	1	3	1
Methyltransferase type 11 OS=Trichodesmium erythraeum (strain IMS101) GN=Tery_0686 PE=4 SV=1	Q118F1	0	0	0	0	0	0	0	0	0
Methyltransferase type 11 OS=Trichodesmium erythraeum (strain IMS101) GN=Tery_1067 PE=4 SV=1	Q116Y8	1	1	2	1	1	1	0	1	0
Methyltransferase type 11 OS=Trichodesmium erythraeum (strain IMS101) GN=Tery_1357 PE=4 SV=1	Q116A4	7	5	5	5	6	6	4	4	8
Methyltransferase type 11 OS=Trichodesmium erythraeum (strain IMS101) GN=Tery_1361 PE=4 SV=1	Q116A1	0	0	0	0	0	0	0	0	0
Methyltransferase type 11 OS=Trichodesmium erythraeum (strain IMS101) GN=Tery_1479 PE=4 SV=1	Q115Q6	13	19	16	13	15	18	11	16	16
Methyltransferase type 11 OS=Trichodesmium erythraeum (strain IMS101) GN=Tery_1991 PE=4 SV=1	Q113T2	0	2	3	1	2	1	0	3	2
Methyltransferase type 11 OS=Trichodesmium erythraeum (strain IMS101) GN=Tery_2053 PE=4 SV=1	Q113N0	1	0	0	0	0	0	0	0	0
Methyltransferase type 11 OS=Trichodesmium erythraeum (strain IMS101) GN=Tery_2150 PE=4 SV=1	Q113E0	1	0	0	0	0	0	0	0	0
Methyltransferase type 11 OS=Trichodesmium erythraeum (strain IMS101) GN=Tery_2173 PE=3 SV=1	Q113B9	17	19	16	19	14	18	17	17	19
Methyltransferase type 11 OS=Trichodesmium erythraeum (strain IMS101) GN=Tery_2956 PE=4 SV=1	Q110F7	1	0	0	0	0	0	0	0	0
Methyltransferase type 11 OS=Trichodesmium erythraeum (strain IMS101) GN=Tery_3190 PE=4 SV=1	Q10ZL0	0	0	2	0	0	0	0	0	0
Methyltransferase type 11 OS=Trichodesmium erythraeum (strain IMS101) GN=Tery_3833 PE=4 SV=1	Q10XZ8	0	0	0	0	0	0	0	0	1
Methyltransferase type 11 OS=Trichodesmium erythraeum (strain IMS101) GN=Tery_3884 PE=3 SV=1	Q10XV3	2	3	2	2	2	2	0	3	2
Methyltransferase type 11 OS=Trichodesmium erythraeum (strain IMS101) GN=Tery_4388 PE=4 SV=1	Q10WJ7	16	18	17	14	16	19	14	16	14
Methyltransferase type 11 OS=Trichodesmium erythraeum (strain IMS101) GN=Tery_4441 PE=4 SV=1	Q10WE6	8	7	9	6	5	6	6	6	5
Methyltransferase type 12 OS=Trichodesmium erythraeum (strain IMS101) GN=Tery_2156 PE=4 SV=1	Q113D4	2	3	3	2	4	3	1	4	5
Methyltransferase type 12 OS=Trichodesmium erythraeum (strain IMS101) GN=Tery_3813 PE=4 SV=1	Q10Y16	0	2	1	2	0	0	0	2	3
Mg chelatase, subunit ChlI OS=Trichodesmium erythraeum (strain IMS101) GN=Tery_4765 PE=4 SV=1	Q10VK5	1	1	0	2	2	1	0	1	1
Mg-protoporphyrin IX chelatase OS=Trichodesmium erythraeum (strain IMS101) GN=Tery_3622 PE=3 SV=1	Q10YI2	9	14	9	10	15	13	12	13	14
Mg-protoporphyrin IX chelatase OS=Trichodesmium erythraeum (strain IMS101) GN=Tery_4967 PE=3 SV=1	Q10V43	0	1	0	0	2	0	0	0	0
Microcompartments protein OS=Trichodesmium erythraeum (strain IMS101) GN=Tery_3396 PE=4 SV=1	Q10Z27	1	2	2	2	2	3	0	4	2
Microcompartments protein OS=Trichodesmium erythraeum (strain IMS101) GN=Tery_3846 PE=4 SV=1	Q10XY6	0	0	0	0	0	0	0	0	0
Microcompartments protein OS=Trichodesmium erythraeum (strain IMS101) GN=Tery_3851 PE=4 SV=1	Q10XY1	38	33	33	28	27	28	26	31	21
Microcompartments protein OS=Trichodesmium erythraeum (strain IMS101) GN=Tery_3852 PE=4 SV=1	Q10XY0	116	106	110	106	95	114	98	120	93
Microcompartments protein OS=Trichodesmium erythraeum (strain IMS101) GN=Tery_4328 PE=4 SV=1	Q10WQ3	0	0	0	0	0	3	0	0	0
Microcompartments protein OS=Trichodesmium erythraeum (strain IMS101) GN=Tery_4329 PE=4 SV=1	Q10WQ2	26	23	25	28	30	28	19	23	19
Mo-dependent nitrogenase-like OS=Trichodesmium erythraeum (strain IMS101) GN=Tery_4114 PE=4 SV=1	Q10XA2	19	20	16	15	19	19	13	17	13
MoFe protein of nitrogenase beta subunit OS=Trichodesmium erythraeum (strain IMS101) GN=nifK PE=3 SV=1	O84930	196	182	181	184	187	202	196	196	181
Molybdenum cofactor biosynthesis protein B OS=Trichodesmium erythraeum (strain IMS101) GN=Tery_2407 PE=3 SV=1	Q112E9	8	10	7	7	9	5	4	7	7
Molybdopterin molybdochelatase OS=Trichodesmium erythraeum (strain IMS101) GN=Tery_0767 PE=4 SV=1	Q117Y0	6	6	8	8	9	8	5	10	9
Monooxygenase, FAD-binding OS=Trichodesmium erythraeum (strain IMS101) GN=Tery_2172 PE=4 SV=1	Q113C0	1	2	3	1	1	1	2	1	1
Monooxygenase, FAD-binding OS=Trichodesmium erythraeum (strain IMS101) GN=Tery_4265 PE=4 SV=1	Q10WW2	0	2	2	0	1	0	0	0	1
MORN motif containing protein OS=Trichodesmium erythraeum (strain IMS101) GN=Tery_1013 PE=4 SV=1	Q117D4	0	0	0	0	0	0	0	0	0
MotA/TolQ/ExbB proton channel OS=Trichodesmium erythraeum (strain IMS101) GN=Tery_1868 PE=3 SV=1	REVERSE_Q114F0	0	0	0	0	0	0	0	0	2
MotA/TolQ/ExbB proton channel OS=Trichodesmium erythraeum (strain IMS101) GN=Tery_4448 PE=3 SV=1	Q10WD9	4	5	5	3	6	3	6	4	6
mRNA interferase OS=Trichodesmium erythraeum (strain IMS101) GN=Tery_0630 PE=3 SV=1	Q118K2	6	6	8	3	7	5	7	7	6
MscS Mechanosensitive ion channel OS=Trichodesmium erythraeum (strain IMS101) GN=Tery_1065 PE=4 SV=1	Q116Z0	0	0	1	0	0	0	0	0	0
MscS Mechanosensitive ion channel OS=Trichodesmium erythraeum (strain IMS101) GN=Tery_4456 PE=4 SV=1	Q10WD1	1	1	2	1	0	0	0	0	0
MscS Mechanosensitive ion channel OS=Trichodesmium erythraeum (strain IMS101) GN=Tery_4761 PE=4 SV=1	Q10VK9	28	31	31	27	30	32	29	36	28
Multi-sensor hybrid histidine kinase OS=Trichodesmium erythraeum (strain IMS101) GN=Tery_4447 PE=4 SV=1	Q10WE0	0	0	0	0	0	0	0	0	0
Multi-sensor signal transduction histidine kinase OS=Trichodesmium erythraeum (strain IMS101) GN=Tery_4749 PE=4 SV=1	Q10VL9	0	0	0	0	0	0	0	0	0
Multicopper oxidase, type 2 OS=Trichodesmium erythraeum (strain IMS101) GN=Tery_5023 PE=4 SV=1	Q10UY9	45	46	33	38	46	42	34	49	40
N utilization substance protein B homolog OS=Trichodesmium erythraeum (strain IMS101) GN=nusB PE=3 SV=1	Q118A6	4	8	5	3	7	5	6	6	7
N-(5'-phosphoribosyl)anthranilate isomerase OS=Trichodesmium erythraeum (strain IMS101) GN=trpF PE=3 SV=1	Q10XS2	1	0	1	0	0	0	0	0	0
N-acetyl-gamma-glutamyl-phosphate reductase OS=Trichodesmium erythraeum (strain IMS101) GN=argC PE=3 SV=1	Q110V5	21	25	24	24	23	24	22	21	21
N-acetylglucosamine-6-phosphate deacetylase OS=Trichodesmium erythraeum (strain IMS101) GN=Tery_4474 PE=3 SV=1	Q10WB3	0	0	0	0	0	0	0	0	0
N-acetylmuramic acid 6-phosphate etherase OS=Trichodesmium erythraeum (strain IMS101) GN=murQ PE=3 SV=1	Q119L1	0	0	0	0	0	0	0	0	0
N-acetylmuramoyl-L-alanine amidase OS=Trichodesmium erythraeum (strain IMS101) GN=Tery_0339 PE=4 SV=1	Q119L2	0	0	0	1	0	1	0	1	0
N-acylglucosamine-6-phosphate 2-epimerase OS=Trichodesmium erythraeum (strain IMS101) GN=Tery_1417 PE=3 SV=1	Q115W1	0	0	0	0	0	0	0	0	0
N5-carboxyaminoimidazole ribonucleotide mutase OS=Trichodesmium erythraeum (strain IMS101) GN=purE PE=3 SV=1	Q10WB1	0	0	0	0	0	0	0	1	0
Na-Ca exchanger/integrin-beta4 OS=Trichodesmium erythraeum (strain IMS101) GN=Tery_0100 PE=4 SV=1	Q11A72	1	2	2	2	0	1	0	0	0
Na-Ca exchanger/integrin-beta4 OS=Trichodesmium erythraeum (strain IMS101) GN=Tery_0666 PE=4 SV=1	Q118G9	31	27	30	26	25	23	16	28	29
Na-Ca exchanger/integrin-beta4 OS=Trichodesmium erythraeum (strain IMS101) GN=Tery_1772 PE=4 SV=1	Q114P2	11	14	11	15	18	11	6	19	11
Na-Ca exchanger/integrin-beta4 OS=Trichodesmium erythraeum (strain IMS101) GN=Tery_1773 PE=4 SV=1	Q114P1	5	4	4	5	7	5	0	7	4
Na-Ca exchanger/integrin-beta4 OS=Trichodesmium erythraeum (strain IMS101) GN=Tery_1906 PE=4 SV=1	Q114B3	14	12	13	15	14	15	5	15	14
Na-Ca exchanger/integrin-beta4 OS=Trichodesmium erythraeum (strain IMS101) GN=Tery_3408 PE=4 SV=1	Q10Z15	31	23	21	28	30	26	22	30	23
Na-Ca exchanger/integrin-beta4 OS=Trichodesmium erythraeum (strain IMS101) GN=Tery_3936 PE=4 SV=1	Q10XQ7	0	0	0	0	0	0	0	0	0
Na+/solute symporter OS=Trichodesmium erythraeum (strain IMS101) GN=Tery_1324 PE=3 SV=1	Q116C9	1	0	1	0	0	0	0	0	1
NAD kinase OS=Trichodesmium erythraeum (strain IMS101) GN=nadK PE=3 SV=1	Q114P4	0	0	0	0	0	0	0	2	0
NAD-dependent epimerase/dehydratase OS=Trichodesmium erythraeum (strain IMS101) GN=Tery_2262 PE=4 SV=1	Q112T4	3	4	3	5	6	2	3	4	6
NAD-dependent epimerase/dehydratase OS=Trichodesmium erythraeum (strain IMS101) GN=Tery_2514 PE=4 SV=1	Q111V4	15	15	17	15	15	16	11	13	14
NAD-dependent epimerase/dehydratase OS=Trichodesmium erythraeum (strain IMS101) GN=Tery_4630 PE=4 SV=1	Q10VX2	31	31	35	27	26	24	18	27	28
NAD-dependent epimerase/dehydratase OS=Trichodesmium erythraeum (strain IMS101) GN=Tery_4630 PE=4 SV=1	REVERSE_Q10VX2	0	0	0	0	0	1	0	0	0
NAD-dependent epimerase/dehydratase OS=Trichodesmium erythraeum (strain IMS101) GN=Tery_4900 PE=4 SV=1	Q10VA0	8	9	9	7	10	7	6	7	8
NAD(P)(+) transhydrogenase (AB-specific) OS=Trichodesmium erythraeum (strain IMS101) GN=Tery_4705 PE=4 SV=1	Q10VQ6	10	12	7	15	16	11	11	19	10
NAD(P)H-quinone oxidoreductase chain 4 1 OS=Trichodesmium erythraeum (strain IMS101) GN=ndhD1 PE=3 SV=1	Q118H6	5	5	0	6	6	5	3	4	4
NAD(P)H-quinone oxidoreductase chain 4 2 OS=Trichodesmium erythraeum (strain IMS101) GN=ndhD2 PE=3 SV=1	Q10ZG8	0	0	0	0	0	0	0	0	0
NAD(P)H-quinone oxidoreductase subunit 1 OS=Trichodesmium erythraeum (strain IMS101) GN=ndhA PE=3 SV=1	Q115G5	3	2	3	0	3	0	2	3	3
NAD(P)H-quinone oxidoreductase subunit 2 OS=Trichodesmium erythraeum (strain IMS101) GN=ndhB PE=3 SV=1	Q111U1	0	5	0	0	5	3	3	3	3
NAD(P)H-quinone oxidoreductase subunit H OS=Trichodesmium erythraeum (strain IMS101) GN=ndhH PE=3 SV=1	Q10VG2	18	17	18	20	21	19	15	18	18
NAD(P)H-quinone oxidoreductase subunit I OS=Trichodesmium erythraeum (strain IMS101) GN=ndhI PE=3 SV=1	Q115G6	8	3	6	6	6	8	4	5	4
NAD(P)H-quinone oxidoreductase subunit J OS=Trichodesmium erythraeum (strain IMS101) GN=ndhJ PE=3 SV=1	Q10YT5	11	8	7	9	9	10	4	11	8
NAD(P)H-quinone oxidoreductase subunit K OS=Trichodesmium erythraeum (strain IMS101) GN=ndhK PE=3 SV=1	Q10YT4	27	21	21	23	22	23	17	23	20
NAD(P)H-quinone oxidoreductase subunit M OS=Trichodesmium erythraeum (strain IMS101) GN=ndhM PE=3 SV=1	Q110L9	7	6	5	9	8	8	9	7	8
NAD(P)H-quinone oxidoreductase subunit N OS=Trichodesmium erythraeum (strain IMS101) GN=ndhN PE=3 SV=1	Q110A6	7	10	0	0	11	13	9	12	7
NAD(P)H-quinone oxidoreductase subunit O OS=Trichodesmium erythraeum (strain IMS101) GN=ndhO PE=3 SV=1	Q117D1	8	7	8	6	7	9	7	9	6
NADH ubiquinone oxidoreductase, 20 kDa subunit OS=Trichodesmium erythraeum (strain IMS101) GN=Tery_3369 PE=4 SV=1	Q10Z53	5	4	3	3	5	2	0	4	6
NADH-ubiquinone/plastoquinone oxidoreductase, chain 6 OS=Trichodesmium erythraeum (strain IMS101) GN=Tery_1577 PE=3 SV=1	Q115G7	2	2	1	2	3	3	1	3	3
NADH:flavin oxidoreductase/NADH oxidase OS=Trichodesmium erythraeum (strain IMS101) GN=Tery_3133 PE=4 SV=1	Q10ZR1	0	3	0	0	0	0	0	0	2
NADPH-dependent FMN reductase OS=Trichodesmium erythraeum (strain IMS101) GN=Tery_3252 PE=4 SV=1	Q10ZF8	0	0	0	0	0	1	0	1	0
NADPH-glutathione reductase OS=Trichodesmium erythraeum (strain IMS101) GN=Tery_4747 PE=3 SV=1	Q10VM1	67	70	75	65	71	66	69	75	60
NH(3)-dependent NAD(+) synthetase OS=Trichodesmium erythraeum (strain IMS101) GN=Tery_1984 PE=3 SV=1	Q113T9	0	0	0	1	0	0	0	0	0
Nicotinate-nucleotide pyrophosphorylase (Carboxylating) OS=Trichodesmium erythraeum (strain IMS101) GN=Tery_4352 PE=3 SV=1	Q10WN0	0	0	0	0	0	0	0	0	0
NifT/FixU OS=Trichodesmium erythraeum (strain IMS101) GN=Tery_4128 PE=4 SV=1	Q10X88	42	38	38	37	37	31	27	34	35
NifX OS=Trichodesmium erythraeum (strain IMS101) GN=nifX PE=4 SV=1	Q9KJL6	12	11	14	12	7	8	9	5	8
NifZ OS=Trichodesmium erythraeum (strain IMS101) GN=Tery_4129 PE=4 SV=1	Q10X87	3	3	6	3	2	0	2	3	4
Nitrilase/cyanide hydratase and apolipoprotein N-acyltransferase OS=Trichodesmium erythraeum (strain IMS101) GN=Tery_1632 PE=4 SV=1	Q115B6	12	12	14	14	12	8	8	11	8
Nitrogen-fixing NifU-like OS=Trichodesmium erythraeum (strain IMS101) GN=Tery_3402 PE=4 SV=1	Q10Z21	0	17	0	0	0	16	0	14	0
Nitrogenase protein alpha chain OS=Trichodesmium erythraeum (strain IMS101) GN=nifD PE=3 SV=1	O84929	101	89	90	98	92	119	95	113	99
Nitrogenase-associated protein OS=Trichodesmium erythraeum (strain IMS101) GN=Tery_3773 PE=3 SV=1	Q10Y53	2	0	1	0	3	2	0	2	3
Nitrogenase-stabilizing/protective protein NifW OS=Trichodesmium erythraeum (strain IMS101) GN=nifW PE=3 SV=1	Q9KJL4	29	29	28	27	25	26	18	25	23
Nitroreductase OS=Trichodesmium erythraeum (strain IMS101) GN=Tery_2657 PE=4 SV=1	Q111H3	140	145	144	143	146	152	124	163	135
Nitroreductase OS=Trichodesmium erythraeum (strain IMS101) GN=Tery_3562 PE=4 SV=1	Q10YM8	16	16	14	14	14	14	12	15	14
NmrA-like OS=Trichodesmium erythraeum (strain IMS101) GN=Tery_1003 PE=4 SV=1	Q117E3	6	5	4	2	3	4	3	4	3
NmrA-like OS=Trichodesmium erythraeum (strain IMS101) GN=Tery_3162 PE=4 SV=1	Q10ZN4	10	16	19	14	17	11	12	16	17
NmrA-like OS=Trichodesmium erythraeum (strain IMS101) GN=Tery_3563 PE=4 SV=1	Q10YM7	14	21	19	18	16	13	12	12	22
Non-canonical purine NTP pyrophosphatase OS=Trichodesmium erythraeum (strain IMS101) GN=Tery_1005 PE=3 SV=1	Q117E1	2	2	0	0	3	0	0	0	2
Nuclease (SNase-like) OS=Trichodesmium erythraeum (strain IMS101) GN=Tery_0407 PE=4 SV=1	Q119F2	0	0	0	0	0	0	0	0	0
Nuclease (SNase-like) OS=Trichodesmium erythraeum (strain IMS101) GN=Tery_0881 PE=4 SV=1	Q117P1	21	20	16	20	22	20	13	20	19
Nuclease (SNase-like) OS=Trichodesmium erythraeum (strain IMS101) GN=Tery_2046 PE=4 SV=1	Q113N7	3	3	5	5	5	3	0	4	3
Nucleoid-associated protein Tery_4027 OS=Trichodesmium erythraeum (strain IMS101) GN=Tery_4027 PE=3 SV=1	Q10XH9	123	123	116	112	115	109	110	116	116
Nucleoside diphosphate kinase OS=Trichodesmium erythraeum (strain IMS101) GN=ndk PE=3 SV=1	Q116S1	52	51	66	67	66	63	62	65	63
Nucleotidyl transferase OS=Trichodesmium erythraeum (strain IMS101) GN=Tery_3188 PE=4 SV=1	Q10ZL2	0	0	0	0	1	0	0	0	0
NUDIX hydrolase OS=Trichodesmium erythraeum (strain IMS101) GN=Tery_1124 PE=4 SV=1	Q116T8	6	11	10	8	8	6	0	10	0
NUDIX hydrolase OS=Trichodesmium erythraeum (strain IMS101) GN=Tery_1319 PE=3 SV=1	Q116D2	6	6	6	4	5	4	2	4	4
O-antigen polymerase OS=Trichodesmium erythraeum (strain IMS101) GN=Tery_3696 PE=4 SV=1	Q10YB8	0	0	0	0	0	0	0	0	0
O-methyltransferase, family 2 OS=Trichodesmium erythraeum (strain IMS101) GN=Tery_3121 PE=4 SV=1	Q10ZS1	30	34	31	32	32	36	31	31	34
O-methyltransferase, family 3 OS=Trichodesmium erythraeum (strain IMS101) GN=Tery_3263 PE=4 SV=1	Q10ZE9	5	4	0	0	5	3	0	4	0
Oligopeptidase A. Metallo peptidase. MEROPS family M03A OS=Trichodesmium erythraeum (strain IMS101) GN=Tery_4649 PE=3 SV=1	Q10VV5	16	16	16	16	19	19	13	20	18
OpcA protein OS=Trichodesmium erythraeum (strain IMS101) GN=Tery_0685 PE=4 SV=1	Q118F2	85	86	90	79	90	78	67	95	69
OpcA protein OS=Trichodesmium erythraeum (strain IMS101) GN=Tery_4316 PE=4 SV=1	Q10WR3	0	2	2	0	3	0	0	4	0
ORF2 OS=Trichodesmium erythraeum (strain IMS101) GN=Tery_4141 PE=4 SV=1	Q9KJL5	16	14	16	18	15	16	18	17	13
Ornithine carbamoyltransferase OS=Trichodesmium erythraeum (strain IMS101) GN=Tery_1323 PE=3 SV=1	Q116D0	22	18	17	24	23	25	13	24	22
Orotate phosphoribosyltransferase OS=Trichodesmium erythraeum (strain IMS101) GN=pyrE PE=3 SV=1	REVERSE_Q119I0	0	1	0	0	0	0	0	0	0
Orotate phosphoribosyltransferase OS=Trichodesmium erythraeum (strain IMS101) GN=pyrE PE=3 SV=1	Q112A1	0	0	0	0	0	0	0	0	0
Orotidine 5'-phosphate decarboxylase OS=Trichodesmium erythraeum (strain IMS101) GN=pyrF PE=3 SV=1	Q119B9	0	1	3	0	0	1	0	0	0
Outer membrane efflux protein OS=Trichodesmium erythraeum (strain IMS101) GN=Tery_4505 PE=4 SV=1	Q10W83	0	0	1	1	2	0	0	0	0
Ovalbumin OS=Gallus gallus GN=SERPINB14 PE=1 SV=2	P01012	0	0	0	0	0	0	0	0	0
Oxidoreductase-like OS=Trichodesmium erythraeum (strain IMS101) GN=Tery_0913 PE=4 SV=1	Q117L2	2	3	8	3	2	0	0	3	0
Oxidoreductase-like OS=Trichodesmium erythraeum (strain IMS101) GN=Tery_4205 PE=4 SV=1	Q10X17	22	22	23	16	21	16	17	23	19
Oxidoreductase-like OS=Trichodesmium erythraeum (strain IMS101) GN=Tery_4981 PE=4 SV=1	Q10V29	14	17	15	17	19	21	15	24	17
Oxidoreductase, molybdopterin binding OS=Trichodesmium erythraeum (strain IMS101) GN=Tery_0060 PE=4 SV=1	REVERSE_Q11AA1	0	0	0	0	0	0	0	0	0
PAP fibrillin OS=Trichodesmium erythraeum (strain IMS101) GN=Tery_4591 PE=4 SV=1	Q10W07	6	6	7	4	8	3	3	6	2
PAS/PAC sensor signal transduction histidine kinase OS=Trichodesmium erythraeum (strain IMS101) GN=Tery_0203 PE=4 SV=1	Q119Y2	1	0	1	0	0	0	0	0	0
Patatin OS=Trichodesmium erythraeum (strain IMS101) GN=Tery_1796 PE=4 SV=1	Q114L9	29	28	27	21	25	22	20	22	22
Pathogenesis-related transcriptional factor and ERF OS=Trichodesmium erythraeum (strain IMS101) GN=Tery_4536 PE=4 SV=1	Q10W58	6	6	9	5	6	4	0	8	5
PBS lyase HEAT-like repeat OS=Trichodesmium erythraeum (strain IMS101) GN=Tery_0929 PE=4 SV=1	Q117K0	2	0	0	0	0	0	1	0	0
PBS lyase HEAT-like repeat OS=Trichodesmium erythraeum (strain IMS101) GN=Tery_0978 PE=4 SV=1	Q117G5	0	0	2	1	0	0	0	0	0
PBS lyase HEAT-like repeat OS=Trichodesmium erythraeum (strain IMS101) GN=Tery_0980 PE=4 SV=1	Q117G3	0	0	0	0	0	0	0	0	1
PBS lyase HEAT-like repeat OS=Trichodesmium erythraeum (strain IMS101) GN=Tery_0987 PE=4 SV=1	Q117F7	1	2	3	3	3	1	3	4	3
PBS lyase HEAT-like repeat OS=Trichodesmium erythraeum (strain IMS101) GN=Tery_0990 PE=4 SV=1	Q117F4	3	11	8	9	7	12	6	8	12
PBS lyase HEAT-like repeat OS=Trichodesmium erythraeum (strain IMS101) GN=Tery_2239 PE=4 SV=1	Q112V6	3	4	4	4	4	4	5	4	5
PBS lyase HEAT-like repeat OS=Trichodesmium erythraeum (strain IMS101) GN=Tery_2382 PE=4 SV=1	Q112H2	1	1	0	0	0	0	0	0	0
Penicillin-binding protein, 1A family OS=Trichodesmium erythraeum (strain IMS101) GN=Tery_0444 PE=4 SV=1	Q119C1	0	0	0	0	1	0	0	2	0
Pentapeptide repeat OS=Trichodesmium erythraeum (strain IMS101) GN=Tery_0271 PE=4 SV=1	Q119S0	13	12	14	10	13	8	6	10	10
Pentapeptide repeat OS=Trichodesmium erythraeum (strain IMS101) GN=Tery_0401 PE=4 SV=1	Q119F7	1	1	0	2	1	1	0	2	1
Pentapeptide repeat OS=Trichodesmium erythraeum (strain IMS101) GN=Tery_0734 PE=4 SV=1	Q118A9	10	9	12	10	8	6	10	9	8
Pentapeptide repeat OS=Trichodesmium erythraeum (strain IMS101) GN=Tery_1987 PE=4 SV=1	Q113T6	7	6	5	4	3	5	2	3	2
Pentapeptide repeat OS=Trichodesmium erythraeum (strain IMS101) GN=Tery_2129 PE=4 SV=1	Q113G1	15	15	16	11	12	12	11	12	10
Pentapeptide repeat OS=Trichodesmium erythraeum (strain IMS101) GN=Tery_4098 PE=4 SV=1	Q10XB8	0	0	0	0	0	0	0	1	0
Pentapeptide repeat OS=Trichodesmium erythraeum (strain IMS101) GN=Tery_4112 PE=4 SV=1	Q10XA4	0	0	0	0	1	0	0	0	0
Pentapeptide repeat OS=Trichodesmium erythraeum (strain IMS101) GN=Tery_4286 PE=4 SV=1	Q10WU2	8	9	9	9	8	7	9	9	8
PEP-utilising enzyme, mobile region OS=Trichodesmium erythraeum (strain IMS101) GN=Tery_3593 PE=3 SV=1	Q10YK3	0	0	0	0	1	0	0	0	0
Peptidase C14, caspase catalytic subunit p20 OS=Trichodesmium erythraeum (strain IMS101) GN=Tery_1841 PE=4 SV=1	Q114H7	4	4	3	4	6	1	1	4	2
Peptidase C14, caspase catalytic subunit P20 OS=Trichodesmium erythraeum (strain IMS101) GN=Tery_2012 PE=4 SV=1	Q113R4	1	2	0	0	2	0	0	2	1
Peptidase C14, caspase catalytic subunit p20 OS=Trichodesmium erythraeum (strain IMS101) GN=Tery_2471 PE=4 SV=1	REVERSE_Q111Z3	0	1	0	0	0	0	0	0	0
Peptidase C14, caspase catalytic subunit p20 OS=Trichodesmium erythraeum (strain IMS101) GN=Tery_2471 PE=4 SV=1	Q111Z3	3	6	0	3	4	2	3	4	2
Peptidase C14, caspase catalytic subunit p20 OS=Trichodesmium erythraeum (strain IMS101) GN=Tery_2624 PE=4 SV=1	Q111K5	5	8	9	5	5	3	4	5	7
Peptidase C14, caspase catalytic subunit p20 OS=Trichodesmium erythraeum (strain IMS101) GN=Tery_2624 PE=4 SV=1	REVERSE_Q111K5	0	0	0	0	0	0	0	0	0
Peptidase M1, membrane alanine aminopeptidase OS=Trichodesmium erythraeum (strain IMS101) GN=Tery_0295 PE=4 SV=1	Q119P9	47	49	50	47	49	49	46	53	49
Peptidase M14, carboxypeptidase A OS=Trichodesmium erythraeum (strain IMS101) GN=Tery_2921 PE=4 SV=1	Q110I7	6	7	4	6	8	6	4	7	5
Peptidase M16-like OS=Trichodesmium erythraeum (strain IMS101) GN=Tery_2773 PE=3 SV=1	Q110W8	13	12	12	12	12	6	7	9	11
Peptidase M16-like OS=Trichodesmium erythraeum (strain IMS101) GN=Tery_2774 PE=4 SV=1	Q110W7	6	8	7	9	4	5	0	8	7
Peptidase M23B OS=Trichodesmium erythraeum (strain IMS101) GN=Tery_0237 PE=4 SV=1	REVERSE_Q119V0	0	0	0	0	0	0	0	0	0
Peptidase M23B OS=Trichodesmium erythraeum (strain IMS101) GN=Tery_1170 PE=4 SV=1	Q116P3	7	9	8	8	7	7	7	12	10
Peptidase M23B OS=Trichodesmium erythraeum (strain IMS101) GN=Tery_2558 PE=4 SV=1	Q111R6	0	0	0	0	0	0	0	0	0
Peptidase M23B OS=Trichodesmium erythraeum (strain IMS101) GN=Tery_4572 PE=4 SV=1	Q10W26	0	0	0	0	1	0	0	0	0
Peptidase M48, Ste24p OS=Trichodesmium erythraeum (strain IMS101) GN=Tery_0762 PE=3 SV=1	Q117Y5	0	0	0	0	0	0	0	0	0
Peptidase M48, Ste24p OS=Trichodesmium erythraeum (strain IMS101) GN=Tery_2250 PE=3 SV=1	Q112U5	0	0	0	0	0	0	0	1	0
Peptidase M50 OS=Trichodesmium erythraeum (strain IMS101) GN=Tery_0417 PE=4 SV=1	Q119E4	5	5	4	4	4	3	2	2	4
Peptidase M61 OS=Trichodesmium erythraeum (strain IMS101) GN=Tery_1038 PE=4 SV=1	Q117B4	8	13	9	12	11	10	10	12	12
Peptidase S1 and S6, chymotrypsin/Hap OS=Trichodesmium erythraeum (strain IMS101) GN=Tery_1884 PE=4 SV=1	Q114D4	0	0	0	0	0	0	0	0	0
Peptidase S1 and S6, chymotrypsin/Hap OS=Trichodesmium erythraeum (strain IMS101) GN=Tery_5059 PE=4 SV=1	Q10UW0	2	1	1	1	0	0	0	0	0
Peptidase S15 OS=Trichodesmium erythraeum (strain IMS101) GN=Tery_0437 PE=4 SV=1	Q119C8	0	0	0	0	0	0	0	0	0
Peptidase S16, lon-like OS=Trichodesmium erythraeum (strain IMS101) GN=Tery_0478 PE=4 SV=1	Q118Z0	0	0	0	0	0	0	0	0	0
Peptidase S8 and S53, subtilisin, kexin, sedolisin OS=Trichodesmium erythraeum (strain IMS101) GN=Tery_2362 PE=4 SV=1	Q112J2	99	93	91	99	111	106	93	114	96
Peptidase S8 and S53, subtilisin, kexin, sedolisin OS=Trichodesmium erythraeum (strain IMS101) GN=Tery_2365 PE=4 SV=1	Q112I9	17	16	10	11	14	15	6	15	10
Peptidase S8 and S53, subtilisin, kexin, sedolisin OS=Trichodesmium erythraeum (strain IMS101) GN=Tery_4393 PE=4 SV=1	Q10WJ3	8	6	3	7	10	4	6	7	7
Peptidase S9, prolyl oligopeptidase active site region OS=Trichodesmium erythraeum (strain IMS101) GN=Tery_1371 PE=4 SV=1	Q115Z2	27	21	29	22	27	22	15	25	19
Peptidase S9, prolyl oligopeptidase active site region OS=Trichodesmium erythraeum (strain IMS101) GN=Tery_2052 PE=4 SV=1	Q113N1	11	11	10	9	9	4	3	11	9
Peptidase S9, prolyl oligopeptidase active site region OS=Trichodesmium erythraeum (strain IMS101) GN=Tery_2052 PE=4 SV=1	REVERSE_Q113N1	0	0	0	0	0	0	0	0	0
Peptidase U61, LD-carboxypeptidase A OS=Trichodesmium erythraeum (strain IMS101) GN=Tery_5012 PE=4 SV=1	Q10V00	0	0	0	0	0	2	0	0	0
Peptidase U62, modulator of DNA gyrase OS=Trichodesmium erythraeum (strain IMS101) GN=Tery_1106 PE=4 SV=1	Q116V3	3	3	0	2	3	1	0	3	2
Peptidase-like OS=Trichodesmium erythraeum (strain IMS101) GN=Tery_1461 PE=4 SV=1	Q115S3	0	1	2	1	1	0	0	0	1
Peptidase-like OS=Trichodesmium erythraeum (strain IMS101) GN=Tery_1893 PE=4 SV=1	REVERSE_Q114C5	0	0	0	0	0	0	0	0	0
Peptidase-like OS=Trichodesmium erythraeum (strain IMS101) GN=Tery_1893 PE=4 SV=1	Q114C5	0	0	0	0	0	0	0	0	0
Peptidase-like OS=Trichodesmium erythraeum (strain IMS101) GN=Tery_2814 PE=4 SV=1	Q110T4	5	4	1	2	8	5	2	4	5
Peptidase-like OS=Trichodesmium erythraeum (strain IMS101) GN=Tery_3497 PE=4 SV=1	Q10YT7	0	0	0	0	0	0	0	0	0
Peptidase-like OS=Trichodesmium erythraeum (strain IMS101) GN=Tery_3711 PE=4 SV=1	Q10YA4	8	9	7	8	5	4	3	8	8
Peptidase-like OS=Trichodesmium erythraeum (strain IMS101) GN=Tery_4303 PE=4 SV=1	Q10WS6	0	0	0	0	0	0	0	0	0
Peptide chain release factor 1 OS=Trichodesmium erythraeum (strain IMS101) GN=prfA PE=3 SV=1	Q110D7	10	9	8	13	14	13	6	15	14
Peptide chain release factor 2 OS=Trichodesmium erythraeum (strain IMS101) GN=Tery_2120 PE=3 SV=1	Q113G9	0	0	0	0	0	1	0	1	0
Peptide chain release factor 2 OS=Trichodesmium erythraeum (strain IMS101) GN=Tery_2120 PE=3 SV=1	REVERSE_Q113G9	0	0	0	0	0	0	0	0	0
Peptide chain release factor 3 OS=Trichodesmium erythraeum (strain IMS101) GN=prfC PE=3 SV=1	Q110K2	5	8	5	5	8	5	5	9	6
Peptide deformylase OS=Trichodesmium erythraeum (strain IMS101) GN=def PE=3 SV=1	Q117U9	0	0	0	3	0	0	0	0	0
Peptide methionine sulfoxide reductase MsrA OS=Trichodesmium erythraeum (strain IMS101) GN=msrA PE=3 SV=1	Q119G2	12	14	11	13	11	15	9	17	6
Peptide methionine sulfoxide reductase MsrB OS=Trichodesmium erythraeum (strain IMS101) GN=msrB PE=3 SV=1	Q10XE3	3	5	3	2	3	6	3	5	3
Peptidoglycan-binding domain 1 OS=Trichodesmium erythraeum (strain IMS101) GN=Tery_4350 PE=4 SV=1	Q10WN2	5	2	3	3	3	0	1	0	3
Peptidoglycan-binding domain 1 OS=Trichodesmium erythraeum (strain IMS101) GN=Tery_4788 PE=4 SV=1	Q10VI5	24	27	28	26	25	24	22	23	25
Peptidyl-prolyl cis-trans isomerase OS=Trichodesmium erythraeum (strain IMS101) GN=Tery_0301 PE=3 SV=1	Q119P4	37	37	34	30	29	32	32	40	22
Peptidyl-prolyl cis-trans isomerase OS=Trichodesmium erythraeum (strain IMS101) GN=Tery_0511 PE=3 SV=1	Q118V8	7	9	11	9	11	10	7	10	6
Peptidyl-prolyl cis-trans isomerase OS=Trichodesmium erythraeum (strain IMS101) GN=Tery_1467 PE=3 SV=1	Q115R7	40	35	38	43	38	48	28	44	36
Peptidyl-prolyl cis-trans isomerase, cyclophilin type OS=Trichodesmium erythraeum (strain IMS101) GN=Tery_1312 PE=4 SV=1	Q116D7	55	52	56	46	48	52	38	50	48
Peptidyl-prolyl cis-trans isomerase, cyclophilin type OS=Trichodesmium erythraeum (strain IMS101) GN=Tery_2704 PE=4 SV=1	Q111D1	4	5	4	7	8	5	3	6	6
Peptidyl-prolyl cis-trans isomerase, cyclophilin type OS=Trichodesmium erythraeum (strain IMS101) GN=Tery_2705 PE=4 SV=1	Q111D0	5	4	2	6	8	5	6	8	5
Peptidyl-tRNA hydrolase OS=Trichodesmium erythraeum (strain IMS101) GN=pth PE=3 SV=1	Q110N1	2	0	0	0	3	0	0	0	2
Peptidylprolyl isomerase OS=Trichodesmium erythraeum (strain IMS101) GN=Tery_1353 PE=4 SV=1	Q116A8	0	0	0	0	0	0	0	0	1
Periplasmic binding protein OS=Trichodesmium erythraeum (strain IMS101) GN=Tery_3943 PE=4 SV=1	Q10XQ2	23	23	21	15	18	15	15	23	16
Periplasmic polyamine-binding protein of ABC transporter OS=Trichodesmium erythraeum (strain IMS101) GN=Tery_2833 PE=4 SV=1	Q110R7	0	0	0	0	0	0	0	0	0
Periplasmic sensor signal transduction histidine kinase OS=Trichodesmium erythraeum (strain IMS101) GN=Tery_1669 PE=4 SV=1	Q114Y4	0	1	0	0	0	0	0	0	0
PfkB OS=Trichodesmium erythraeum (strain IMS101) GN=Tery_1940 PE=4 SV=1	Q113X9	0	0	0	0	0	0	0	0	0
PfkB OS=Trichodesmium erythraeum (strain IMS101) GN=Tery_2734 PE=4 SV=1	Q111A6	10	14	11	10	13	9	11	11	9
PfkB OS=Trichodesmium erythraeum (strain IMS101) GN=Tery_3284 PE=3 SV=1	Q10ZC8	43	40	48	37	42	39	29	35	34
PHA accumulation regulator DNA-binding-like OS=Trichodesmium erythraeum (strain IMS101) GN=Tery_2388 PE=4 SV=1	Q112G8	9	10	9	11	6	0	0	6	6
Phage shock protein A, PspA OS=Trichodesmium erythraeum (strain IMS101) GN=Tery_4081 PE=4 SV=1	Q10XD4	67	69	64	56	56	52	39	61	55
Phage shock protein A, PspA OS=Trichodesmium erythraeum (strain IMS101) GN=Tery_4082 PE=4 SV=1	Q10XD3	24	27	26	22	20	20	15	24	21
Phenylalanine--tRNA ligase alpha subunit OS=Trichodesmium erythraeum (strain IMS101) GN=pheS PE=3 SV=1	Q10YV2	10	12	11	13	13	14	7	15	11
Phenylalanine--tRNA ligase beta subunit OS=Trichodesmium erythraeum (strain IMS101) GN=pheT PE=3 SV=1	Q113M0	17	17	20	15	17	17	13	20	16
Pheophorbide a oxygenase OS=Trichodesmium erythraeum (strain IMS101) GN=Tery_3793 PE=4 SV=1	Q10Y35	2	1	1	0	1	0	0	2	0
Phosphate acyltransferase OS=Trichodesmium erythraeum (strain IMS101) GN=plsX PE=3 SV=1	Q114K1	22	24	19	21	23	21	15	25	20
Phosphate transport system permease protein PstA OS=Trichodesmium erythraeum (strain IMS101) GN=Tery_3539 PE=3 SV=1	Q10YP8	0	0	0	0	0	0	0	1	0
Phosphate-binding protein OS=Trichodesmium erythraeum (strain IMS101) GN=Tery_3537 PE=3 SV=1	Q10YQ0	50	48	50	43	38	42	42	44	41
Phosphoenolpyruvate carboxylase OS=Trichodesmium erythraeum (strain IMS101) GN=ppc PE=3 SV=1	Q117S5	6	6	5	8	8	4	4	9	8
Phosphoenolpyruvate synthase OS=Trichodesmium erythraeum (strain IMS101) GN=Tery_4209 PE=3 SV=1	Q10X13	0	0	0	0	0	0	0	0	0
Phosphoglucomutase OS=Trichodesmium erythraeum (strain IMS101) GN=Tery_0970 PE=3 SV=1	Q117H1	11	12	10	11	14	11	5	12	9
Phosphoglucomutase/phosphomannomutase alpha/beta/alpha domain I OS=Trichodesmium erythraeum (strain IMS101) GN=Tery_1084 PE=3 SV=1	Q116X2	57	62	61	57	55	58	48	62	59
Phosphoglycerate kinase OS=Trichodesmium erythraeum (strain IMS101) GN=pgk PE=3 SV=1	Q10Z46	263	267	241	241	241	242	259	262	238
Phosphoglycerate mutase OS=Trichodesmium erythraeum (strain IMS101) GN=Tery_2127 PE=4 SV=1	Q113G3	2	3	2	3	3	3	3	4	3
Phosphoglycerate mutase OS=Trichodesmium erythraeum (strain IMS101) GN=Tery_2181 PE=3 SV=1	Q113B2	16	21	23	20	29	21	19	28	19
Phospholipase/Carboxylesterase OS=Trichodesmium erythraeum (strain IMS101) GN=Tery_2641 PE=4 SV=1	Q111I8	3	3	0	4	5	3	1	3	4
Phospholipase/Carboxylesterase OS=Trichodesmium erythraeum (strain IMS101) GN=Tery_3567 PE=4 SV=1	Q10YM3	0	1	0	0	1	0	0	0	2
Phosphomethylpyrimidine kinase OS=Trichodesmium erythraeum (strain IMS101) GN=Tery_3765 PE=4 SV=1	Q10Y60	0	1	1	1	2	1	2	3	1
Phosphonate ABC transporter, periplasmic phosphonate-binding protein OS=Trichodesmium erythraeum (strain IMS101) GN=Tery_0366 PE=4 SV=1	Q119I9	35	34	32	36	30	36	23	39	29
Phosphonate ABC transporter, periplasmic phosphonate-binding protein OS=Trichodesmium erythraeum (strain IMS101) GN=Tery_4153 PE=4 SV=1	Q10X64	4	5	2	3	7	2	2	7	8
Phosphonate metabolism OS=Trichodesmium erythraeum (strain IMS101) GN=Tery_4999 PE=4 SV=1	Q10V11	0	0	0	0	0	0	0	0	0
Phosphoribosylamine--glycine ligase OS=Trichodesmium erythraeum (strain IMS101) GN=purD PE=3 SV=1	Q115R3	5	5	4	5	6	6	3	6	6
Phosphoribosylaminoimidazole-succinocarboxamide synthase OS=Trichodesmium erythraeum (strain IMS101) GN=purC PE=3 SV=1	Q10VV0	13	11	10	11	8	11	4	10	11
Phosphoribosylformylglycinamidine cyclo-ligase OS=Trichodesmium erythraeum (strain IMS101) GN=purM PE=3 SV=1	Q110U7	2	3	4	1	0	2	0	3	2
Phosphoribosylformylglycinamidine synthase subunit PurL OS=Trichodesmium erythraeum (strain IMS101) GN=purL PE=3 SV=1	Q111N1	5	5	4	3	4	4	4	6	4
Phosphoribosylformylglycinamidine synthase subunit PurS OS=Trichodesmium erythraeum (strain IMS101) GN=purS PE=3 SV=1	Q113W7	0	0	0	0	0	0	0	0	0
Phosphoribosylglycinamide formyltransferase OS=Trichodesmium erythraeum (strain IMS101) GN=purN PE=3 SV=1	Q10VW9	0	1	0	0	2	0	0	0	1
Phosphoribulokinase/uridine kinase OS=Trichodesmium erythraeum (strain IMS101) GN=Tery_1845 PE=4 SV=1	Q114H3	13	9	13	6	7	11	3	6	8
Photosystem antenna protein-like OS=Trichodesmium erythraeum (strain IMS101) GN=Tery_2485 PE=4 SV=1	Q111Y1	29	33	22	31	32	30	26	31	30
Photosystem I assembly protein Ycf3 OS=Trichodesmium erythraeum (strain IMS101) GN=ycf3 PE=3 SV=2	Q10W18	1	0	0	1	0	2	0	3	0
Photosystem I assembly protein Ycf4 OS=Trichodesmium erythraeum (strain IMS101) GN=ycf4 PE=3 SV=1	Q118V7	4	4	4	3	5	6	2	3	3
Photosystem II CP43 reaction center protein OS=Trichodesmium erythraeum (strain IMS101) GN=psbC PE=3 SV=1	Q118V6	64	56	77	51	55	66	54	58	43
Photosystem II CP47 reaction center protein OS=Trichodesmium erythraeum (strain IMS101) GN=psbB PE=3 SV=1	Q10VU0	106	92	104	94	86	87	90	82	88
Photosystem II D2 protein OS=Trichodesmium erythraeum (strain IMS101) GN=psbD PE=3 SV=1	Q116J3	34	34	34	27	32	32	29	33	30
Photosystem II lipoprotein Psb27 OS=Trichodesmium erythraeum (strain IMS101) GN=psb27 PE=3 SV=1	Q114S4	19	15	20	13	18	21	16	20	16
Photosystem II manganese-stabilizing protein PsbO OS=Trichodesmium erythraeum (strain IMS101) GN=Tery_3917 PE=4 SV=1	Q10XS5	81	69	69	59	65	60	49	66	56
Photosystem II oxygen evolving complex protein PsbP OS=Trichodesmium erythraeum (strain IMS101) GN=Tery_0164 PE=4 SV=1	Q11A16	25	24	23	25	23	18	20	25	26
Photosystem II reaction center protein H OS=Trichodesmium erythraeum (strain IMS101) GN=psbH PE=3 SV=1	Q110N3	0	0	0	0	0	0	0	0	0
Photosystem II reaction center Psb28 protein OS=Trichodesmium erythraeum (strain IMS101) GN=psb28 PE=3 SV=2	Q112E8	20	21	23	20	22	19	15	25	18
Phycobilisome 7.8 kDa linker polypeptide, allophycocyanin-associated, core OS=Trichodesmium erythraeum (strain IMS101) GN=Tery_3647 PE=3 SV=1	Q10YG2	23	19	26	24	21	22	19	22	21
Phycobilisome linker polypeptide OS=Trichodesmium erythraeum (strain IMS101) GN=Tery_0999 PE=3 SV=1	Q117E7	76	76	86	81	86	84	54	78	69
Phycobilisome linker polypeptide OS=Trichodesmium erythraeum (strain IMS101) GN=Tery_3909 PE=3 SV=1	Q10XT2	280	272	255	250	246	247	240	258	246
Phycobilisome linker polypeptide OS=Trichodesmium erythraeum (strain IMS101) GN=Tery_4104 PE=3 SV=1	Q10XB2	113	117	129	121	112	113	112	136	114
Phycobilisome linker polypeptide OS=Trichodesmium erythraeum (strain IMS101) GN=Tery_4105 PE=3 SV=1	Q10XB1	98	78	76	90	83	78	76	79	80
Phycobilisome protein OS=Trichodesmium erythraeum (strain IMS101) GN=Tery_0984 PE=3 SV=1	Q117G0	439	435	394	409	415	420	393	401	392
Phycobilisome protein OS=Trichodesmium erythraeum (strain IMS101) GN=Tery_3240 PE=3 SV=1	Q10ZG9	2	4	1	4	5	5	3	4	4
Phycobilisome protein OS=Trichodesmium erythraeum (strain IMS101) GN=Tery_3650 PE=3 SV=1	Q10YG0	304	263	253	284	231	311	209	352	232
Phycocyanin, alpha subunit OS=Trichodesmium erythraeum (strain IMS101) GN=Tery_5048 PE=3 SV=1	Q10UW8	563	502	474	440	529	512	538	476	513
Phycocyanin, beta subunit OS=Trichodesmium erythraeum (strain IMS101) GN=Tery_5049 PE=3 SV=1	Q10UW7	208	187	213	173	223	210	195	189	210
Phycoerythrobilin:ferredoxin oxidoreductase OS=Trichodesmium erythraeum (strain IMS101) GN=pebB PE=3 SV=1	Q10UW6	0	0	0	0	0	0	0	0	0
Phytochelatin synthase-like OS=Trichodesmium erythraeum (strain IMS101) GN=Tery_2472 PE=4 SV=1	Q111Z2	0	1	2	0	0	0	0	2	0
PilT protein-like OS=Trichodesmium erythraeum (strain IMS101) GN=Tery_1195 PE=4 SV=1	Q116M2	0	1	1	0	0	0	0	0	0
Pirin-like OS=Trichodesmium erythraeum (strain IMS101) GN=Tery_0103 PE=3 SV=1	Q11A70	0	0	0	0	0	0	0	0	0
Plasmid stabilization system OS=Trichodesmium erythraeum (strain IMS101) GN=Tery_1455 PE=4 SV=1	Q115S9	0	5	0	0	4	0	0	3	0
Polar amino acid ABC transporter, inner membrane subunit OS=Trichodesmium erythraeum (strain IMS101) GN=Tery_1999 PE=3 SV=1	Q113S6	3	2	2	2	0	0	1	1	0
Polyamine aminopropyltransferase OS=Trichodesmium erythraeum (strain IMS101) GN=speE PE=3 SV=1	Q118C0	2	2	2	1	1	0	0	2	0
Polyamine aminopropyltransferase OS=Trichodesmium erythraeum (strain IMS101) GN=speE PE=3 SV=1	Q117N7	4	3	5	4	3	0	1	5	1
Polyphosphate kinase OS=Trichodesmium erythraeum (strain IMS101) GN=ppk PE=3 SV=1	Q116U7	0	2	0	1	2	1	0	2	2
Polyribonucleotide nucleotidyltransferase OS=Trichodesmium erythraeum (strain IMS101) GN=pnp PE=3 SV=1	Q115K2	107	98	97	96	93	100	86	103	86
Polysaccharide deacetylase OS=Trichodesmium erythraeum (strain IMS101) GN=Tery_3931 PE=4 SV=1	Q10XR2	0	0	0	0	0	0	0	0	0
Porphobilinogen deaminase OS=Trichodesmium erythraeum (strain IMS101) GN=hemC PE=3 SV=1	Q10VY0	14	16	22	17	18	15	11	21	14
PRC-barrel OS=Trichodesmium erythraeum (strain IMS101) GN=Tery_1550 PE=4 SV=1	Q115J4	13	14	14	12	10	11	7	14	10
Precorrin-3 methyltransferase OS=Trichodesmium erythraeum (strain IMS101) GN=Tery_4366 PE=4 SV=1	Q10WL6	1	1	1	0	1	0	0	0	1
Precorrin-6Y C5,15-methyltransferase (Decarboxylating), CbiT subunit OS=Trichodesmium erythraeum (strain IMS101) GN=Tery_1288 PE=4 SV=1	Q116F5	0	1	1	2	4	0	1	0	2
Precorrin-8X methylmutase OS=Trichodesmium erythraeum (strain IMS101) GN=Tery_3745 PE=4 SV=1	Q10Y76	0	1	0	0	0	3	0	3	0
Primary replicative DNA helicase OS=Trichodesmium erythraeum (strain IMS101) GN=Tery_1462 PE=4 SV=1	REVERSE_Q115S2	0	0	0	0	0	0	0	0	0
Probable 2-phosphosulfolactate phosphatase OS=Trichodesmium erythraeum (strain IMS101) GN=comB PE=3 SV=1	Q116L2	21	20	24	17	18	18	14	21	17
Probable 30S ribosomal protein PSRP-3 OS=Trichodesmium erythraeum (strain IMS101) GN=Tery_3451 PE=3 SV=1	Q10YY1	22	22	22	22	27	27	21	25	20
Probable aspartoacylase OS=Trichodesmium erythraeum (strain IMS101) GN=Tery_4698 PE=3 SV=1	Q10VR3	2	2	1	3	4	3	2	0	4
Probable cytosol aminopeptidase OS=Trichodesmium erythraeum (strain IMS101) GN=pepA PE=3 SV=1	Q11A96	85	85	86	80	88	82	75	87	82
Probable dual-specificity RNA methyltransferase RlmN OS=Trichodesmium erythraeum (strain IMS101) GN=rlmN PE=3 SV=1	Q110I1	1	0	1	0	0	1	1	0	0
Probable transcriptional regulatory protein Tery_2125 OS=Trichodesmium erythraeum (strain IMS101) GN=Tery_2125 PE=3 SV=1	Q113G4	0	0	0	0	0	0	0	0	0
Proline--tRNA ligase OS=Trichodesmium erythraeum (strain IMS101) GN=proS PE=3 SV=1	Q116D3	23	24	34	24	21	19	21	25	22
Protease 4 OS=Trichodesmium erythraeum (strain IMS101) GN=Tery_1590 PE=3 SV=1	Q115F5	2	4	3	0	3	0	0	2	2
Protein GrpE OS=Trichodesmium erythraeum (strain IMS101) GN=grpE PE=3 SV=1	Q114R5	20	17	20	19	19	20	14	18	19
Protein PatA OS=Trichodesmium erythraeum (strain IMS101) GN=Tery_0608 PE=2 SV=1	Q118M2	0	1	0	0	0	0	0	2	0
Protein RecA OS=Trichodesmium erythraeum (strain IMS101) GN=recA PE=3 SV=1	Q111E0	4	7	3	8	8	9	9	13	10
Protein splicing site OS=Trichodesmium erythraeum (strain IMS101) GN=Tery_1543 PE=4 SV=1	REVERSE_Q115K1	0	0	0	2	0	2	0	1	0
Protein splicing site OS=Trichodesmium erythraeum (strain IMS101) GN=Tery_1543 PE=4 SV=1	Q115K1	2	1	2	0	1	1	0	0	0
Protein splicing site OS=Trichodesmium erythraeum (strain IMS101) GN=Tery_2478 PE=4 SV=1	Q111Y7	16	20	15	12	17	12	13	15	16
Protein Thf1 OS=Trichodesmium erythraeum (strain IMS101) GN=thf1 PE=3 SV=1	Q116P5	29	26	24	26	27	24	19	23	22
Protein translocase subunit SecA OS=Trichodesmium erythraeum (strain IMS101) GN=secA PE=3 SV=1	Q10VW7	35	40	42	36	44	36	25	42	39
Protein translocase subunit SecD OS=Trichodesmium erythraeum (strain IMS101) GN=secD PE=3 SV=1	Q10UU4	12	9	8	6	6	6	10	8	7
Protein translocase subunit SecE OS=Trichodesmium erythraeum (strain IMS101) GN=secE PE=3 SV=1	Q119S4	4	3	0	0	4	3	3	4	3
Protein tyrosine phosphatase OS=Trichodesmium erythraeum (strain IMS101) GN=Tery_3848 PE=4 SV=1	Q10XY4	3	1	3	4	2	2	2	5	5
Protein tyrosine phosphatase OS=Trichodesmium erythraeum (strain IMS101) GN=Tery_4026 PE=4 SV=1	Q10XI0	4	3	3	2	2	4	0	4	3
Protein-export membrane protein SecF OS=Trichodesmium erythraeum (strain IMS101) GN=secF PE=3 SV=1	Q10UU5	3	4	2	4	3	3	1	2	3
Proton-translocating NADH-quinone oxidoreductase, chain L OS=Trichodesmium erythraeum (strain IMS101) GN=Tery_0660 PE=4 SV=1	Q118H5	10	9	8	7	6	6	7	7	6
Protoporphyrin ferrochelatase OS=Trichodesmium erythraeum (strain IMS101) GN=Tery_0602 PE=3 SV=1	Q118M8	4	5	5	2	2	2	1	4	2
Protoporphyrinogen oxidase OS=Trichodesmium erythraeum (strain IMS101) GN=Tery_2218 PE=4 SV=1	Q112X7	19	25	24	20	26	19	18	23	19
Putative anti-sigma regulatory factor, serine/threonine protein kinase OS=Trichodesmium erythraeum (strain IMS101) GN=Tery_5013 PE=4 SV=1	Q10UZ9	3	6	4	4	6	2	2	5	5
Putative branched-chain amino acid aminotransferase OS=Trichodesmium erythraeum (strain IMS101) GN=Tery_4094 PE=4 SV=1	Q10XC2	0	0	0	0	0	0	0	0	0
Putative CheA signal transduction histidine kinases OS=Trichodesmium erythraeum (strain IMS101) GN=Tery_2347 PE=4 SV=1	Q112K7	2	0	1	2	0	0	0	1	2
Putative CheA signal transduction histidine kinases OS=Trichodesmium erythraeum (strain IMS101) GN=Tery_3244 PE=4 SV=1	Q10ZG5	0	0	0	0	1	0	0	0	2
Putative enzyme of poly-gamma-glutamate biosynthesis (Capsule formation)-like OS=Trichodesmium erythraeum (strain IMS101) GN=Tery_0958 PE=4 SV=1	Q117H7	0	0	0	0	0	0	0	0	0
Putative flavin-binding monooxygenase OS=Trichodesmium erythraeum (strain IMS101) GN=Tery_3824 PE=4 SV=1	Q10Y06	0	1	0	1	3	2	0	2	3
Putative GAF sensor protein OS=Trichodesmium erythraeum (strain IMS101) GN=Tery_3971 PE=4 SV=1	Q10XM8	0	2	3	2	5	2	0	0	2
Putative multicomponent Na+:H+ antiporter subunit B OS=Trichodesmium erythraeum (strain IMS101) GN=Tery_1619 PE=4 SV=1	Q115C6	0	2	0	0	2	0	0	2	2
Putative nickel-containing superoxide dismutase (NISOD) OS=Trichodesmium erythraeum (strain IMS101) GN=Tery_0891 PE=4 SV=1	Q117N2	25	21	28	19	25	35	21	32	19
Putative phosphoribosylaminoimidazole carboxylase catalytic subunit OS=Trichodesmium erythraeum (strain IMS101) GN=Tery_4722 PE=4 SV=1	Q10VP0	3	2	3	2	0	1	1	2	1
Putative pterin-4-alpha-carbinolamine dehydratase OS=Trichodesmium erythraeum (strain IMS101) GN=Tery_1232 PE=3 SV=1	Q116J2	20	24	25	23	20	23	19	24	20
Putative sensor protein OS=Trichodesmium erythraeum (strain IMS101) GN=Tery_4298 PE=4 SV=1	Q10WT1	32	34	30	34	35	39	28	40	39
Putative signal transduction protein with CBS domains OS=Trichodesmium erythraeum (strain IMS101) GN=Tery_2240 PE=4 SV=1	Q112V5	7	7	6	6	7	8	3	11	8
Putative signal transduction protein with Nacht domain OS=Trichodesmium erythraeum (strain IMS101) GN=Tery_2632 PE=4 SV=1	REVERSE_Q111J7	0	0	0	0	1	0	0	0	0
Putative signal transduction protein with Nacht domain OS=Trichodesmium erythraeum (strain IMS101) GN=Tery_4985 PE=4 SV=1	Q10V25	0	0	0	1	0	0	0	1	0
Putative transcriptional regulator OS=Trichodesmium erythraeum (strain IMS101) GN=Tery_0202 PE=4 SV=1	Q119Y3	0	1	1	2	0	0	2	1	1
Pyridine nucleotide-disulphide oxidoreductase dimerisation region OS=Trichodesmium erythraeum (strain IMS101) GN=Tery_1612 PE=4 SV=1	Q115D3	0	0	0	0	0	0	0	0	0
Pyridine nucleotide-disulphide oxidoreductase dimerisation region OS=Trichodesmium erythraeum (strain IMS101) GN=Tery_3348 PE=3 SV=1	Q10Z74	0	0	1	1	2	2	0	0	0
Pyridoxal-5'-phosphate-dependent enzyme, beta subunit OS=Trichodesmium erythraeum (strain IMS101) GN=Tery_4742 PE=4 SV=1	Q10VM5	21	23	20	18	22	19	12	26	22
Pyridoxamine 5'-phosphate oxidase-related, FMN-binding OS=Trichodesmium erythraeum (strain IMS101) GN=Tery_3018 PE=4 SV=1	Q110A1	0	0	0	0	2	0	0	2	2
Pyridoxine 5'-phosphate synthase OS=Trichodesmium erythraeum (strain IMS101) GN=pdxJ PE=3 SV=1	Q10X41	0	0	0	1	0	0	0	0	0
Pyrroline-5-carboxylate reductase OS=Trichodesmium erythraeum (strain IMS101) GN=proC PE=3 SV=1	Q10V93	0	1	1	0	0	3	0	0	1
Pyruvate dehydrogenase E1 component subunit alpha OS=Trichodesmium erythraeum (strain IMS101) GN=pdhA PE=4 SV=1	Q10UV4	28	32	32	29	37	29	27	35	28
Pyruvate kinase OS=Trichodesmium erythraeum (strain IMS101) GN=Tery_2926 PE=3 SV=1	Q110I2	36	42	41	39	38	29	31	39	38
Queuine tRNA-ribosyltransferase OS=Trichodesmium erythraeum (strain IMS101) GN=tgt PE=3 SV=1	Q112A6	5	4	4	5	6	3	0	5	5
Radical SAM OS=Trichodesmium erythraeum (strain IMS101) GN=Tery_2906 PE=4 SV=1	REVERSE_Q110K0	0	0	0	0	0	0	0	0	0
Radical SAM OS=Trichodesmium erythraeum (strain IMS101) GN=Tery_4389 PE=4 SV=1	Q10WJ6	8	8	10	7	7	12	8	9	11
Radical SAM OS=Trichodesmium erythraeum (strain IMS101) GN=Tery_4964 PE=4 SV=1	Q10V46	1	2	1	0	0	0	0	0	0
Radical SAM OS=Trichodesmium erythraeum (strain IMS101) GN=Tery_4964 PE=4 SV=1	REVERSE_Q10V46	1	1	1	0	0	0	0	2	0
Redoxin OS=Trichodesmium erythraeum (strain IMS101) GN=Tery_0162 PE=4 SV=1	Q11A18	160	161	174	175	163	178	152	179	170
Redoxin OS=Trichodesmium erythraeum (strain IMS101) GN=Tery_2703 PE=4 SV=1	Q111D2	6	6	3	7	9	7	0	8	7
Redoxin OS=Trichodesmium erythraeum (strain IMS101) GN=Tery_3182 PE=4 SV=1	Q10ZL7	3	2	5	6	5	4	5	5	4
Redoxin OS=Trichodesmium erythraeum (strain IMS101) GN=Tery_3842 PE=4 SV=1	Q10XZ0	29	30	31	34	35	30	24	32	30
Redoxin OS=Trichodesmium erythraeum (strain IMS101) GN=Tery_3959 PE=4 SV=1	Q10XN9	80	89	79	87	79	79	88	94	63
REG-2-like, HAD superfamily (Subfamily IA) hydrolase OS=Trichodesmium erythraeum (strain IMS101) GN=Tery_3660 PE=4 SV=1	Q10YF2	2	0	3	0	2	0	1	0	2
Regulatory protein CII OS=Trichodesmium erythraeum (strain IMS101) GN=Tery_3667 PE=4 SV=1	Q10YE5	0	0	0	0	0	2	1	0	0
Response regulator receiver modulated serine phosphatase with GAF sensor OS=Trichodesmium erythraeum (strain IMS101) GN=Tery_4817 PE=4 SV=1	Q10VG0	4	4	3	4	7	3	2	5	8
Response regulator receiver protein OS=Trichodesmium erythraeum (strain IMS101) GN=Tery_0717 PE=4 SV=1	Q118C4	4	4	4	3	3	4	0	4	4
Response regulator receiver protein OS=Trichodesmium erythraeum (strain IMS101) GN=Tery_1902 PE=4 SV=1	Q114B7	2	3	3	2	4	3	0	4	1
Response regulator receiver protein OS=Trichodesmium erythraeum (strain IMS101) GN=Tery_3395 PE=4 SV=1	Q10Z28	0	0	0	0	0	0	0	1	0
Response regulator receiver protein OS=Trichodesmium erythraeum (strain IMS101) GN=Tery_3494 PE=4 SV=1	Q10YU0	12	11	10	16	15	12	7	15	17
Response regulator receiver protein OS=Trichodesmium erythraeum (strain IMS101) GN=Tery_3494 PE=4 SV=1	REVERSE_Q10YU0	0	0	0	0	0	0	0	0	0
Response regulator receiver protein OS=Trichodesmium erythraeum (strain IMS101) GN=Tery_4222 PE=4 SV=1	Q10X01	0	0	3	0	2	0	0	0	0
Response regulator receiver protein OS=Trichodesmium erythraeum (strain IMS101) GN=Tery_4223 PE=4 SV=1	Q10X00	2	2	0	2	0	0	0	0	0
RfaE bifunctional protein OS=Trichodesmium erythraeum (strain IMS101) GN=Tery_3495 PE=4 SV=1	Q10YT9	1	2	2	2	3	2	2	2	3
Rho termination factor-like OS=Trichodesmium erythraeum (strain IMS101) GN=Tery_0018 PE=4 SV=1	Q11AD2	10	12	13	28	11	11	3	8	8
Rhodanese-like OS=Trichodesmium erythraeum (strain IMS101) GN=Tery_0713 PE=4 SV=1	Q118C8	0	0	0	0	0	0	1	4	0
Rhodanese-like OS=Trichodesmium erythraeum (strain IMS101) GN=Tery_4532 PE=4 SV=1	Q10W62	51	47	43	43	52	40	38	48	36
Riboflavin biosynthesis protein RibBA OS=Trichodesmium erythraeum (strain IMS101) GN=ribBA PE=3 SV=1	Q10WC5	2	4	2	1	1	2	1	3	2
Riboflavin biosynthesis protein RibD OS=Trichodesmium erythraeum (strain IMS101) GN=Tery_1661 PE=3 SV=1	Q114Z2	0	2	2	0	1	0	2	2	0
Ribokinase OS=Trichodesmium erythraeum (strain IMS101) GN=rbsK PE=3 SV=1	Q117Q3	0	2	2	0	0	0	0	2	0
Ribonuclease 3 OS=Trichodesmium erythraeum (strain IMS101) GN=rnc PE=3 SV=1	Q113E6	0	0	0	0	0	0	0	0	0
Ribonuclease H OS=Trichodesmium erythraeum (strain IMS101) GN=rnhA PE=3 SV=1	Q115G0	0	0	1	0	0	0	0	0	0
Ribonuclease H OS=Trichodesmium erythraeum (strain IMS101) GN=Tery_4732 PE=4 SV=1	Q10VN1	14	16	13	15	17	14	5	16	7
Ribonuclease PH OS=Trichodesmium erythraeum (strain IMS101) GN=rph PE=3 SV=1	Q113J5	12	14	17	12	14	10	11	11	11
Ribonuclease T2 OS=Trichodesmium erythraeum (strain IMS101) GN=Tery_3279 PE=3 SV=1	Q10ZD3	6	6	3	4	6	2	4	6	4
Ribose-5-phosphate isomerase A OS=Trichodesmium erythraeum (strain IMS101) GN=rpiA PE=3 SV=1	Q111U2	33	37	35	26	32	30	27	36	30
Ribose-phosphate pyrophosphokinase OS=Trichodesmium erythraeum (strain IMS101) GN=prs PE=3 SV=1	Q118N3	5	8	6	6	5	6	4	4	6
Ribosomal protein L11 methyltransferase OS=Trichodesmium erythraeum (strain IMS101) GN=prmA PE=3 SV=1	Q10X25	0	0	2	0	2	2	0	3	2
Ribosomal silencing factor RsfS OS=Trichodesmium erythraeum (strain IMS101) GN=rsfS PE=3 SV=1	Q10VW4	0	0	0	0	0	0	0	0	0
Ribosome maturation factor RimP OS=Trichodesmium erythraeum (strain IMS101) GN=rimP PE=3 SV=2	Q10XM0	0	2	0	0	0	0	0	0	0
Ribosome-binding ATPase YchF OS=Trichodesmium erythraeum (strain IMS101) GN=ychF PE=3 SV=1	Q116H3	33	35	29	31	27	27	22	31	28
Ribosome-binding factor A OS=Trichodesmium erythraeum (strain IMS101) GN=rbfA PE=3 SV=1	Q110L1	3	3	3	3	6	0	0	4	4
Ribulose 1,5-bisphosphate carboxylase small subunit OS=Trichodesmium erythraeum (strain IMS101) GN=Tery_1574 PE=4 SV=1	Q115H0	11	12	7	8	6	5	5	9	9
Ribulose-phosphate 3-epimerase OS=Trichodesmium erythraeum (strain IMS101) GN=Tery_2606 PE=3 SV=1	Q111M3	7	4	6	5	8	6	8	8	4
RNA methyltransferase, TrmH family, group 3 OS=Trichodesmium erythraeum (strain IMS101) GN=Tery_2313 PE=3 SV=1	Q112N7	3	5	4	4	4	2	2	4	3
RNA polymerase sigma factor OS=Trichodesmium erythraeum (strain IMS101) GN=Tery_1956 PE=3 SV=1	Q113W5	0	0	0	0	0	0	0	0	0
RNA polymerase sigma factor SigA OS=Trichodesmium erythraeum (strain IMS101) GN=sigA PE=3 SV=1	Q10UV2	2	1	2	1	3	2	1	2	1
RNA polymerase, sigma 28 subunit OS=Trichodesmium erythraeum (strain IMS101) GN=Tery_4426 PE=3 SV=1	Q10WG0	2	0	0	1	2	1	0	2	2
RNA polymerase, sigma 28 subunit OS=Trichodesmium erythraeum (strain IMS101) GN=Tery_4426 PE=3 SV=1	REVERSE_Q10WG0	0	0	0	0	0	0	0	0	0
RNA polymerase, sigma-24 subunit, ECF subfamily OS=Trichodesmium erythraeum (strain IMS101) GN=Tery_0385 PE=3 SV=1	Q119H1	0	0	0	0	0	0	0	0	0
RNA-binding protein (Contains KH domain)-like OS=Trichodesmium erythraeum (strain IMS101) GN=Tery_2537 PE=4 SV=1	Q111T5	1	2	2	2	2	3	2	3	1
RNA-binding region RNP-1 OS=Trichodesmium erythraeum (strain IMS101) GN=Tery_1863 PE=4 SV=1	Q114F5	23	22	20	21	28	28	20	28	24
RNA-binding region RNP-1 OS=Trichodesmium erythraeum (strain IMS101) GN=Tery_4701 PE=4 SV=1	Q10VR0	74	69	71	62	59	73	57	79	57
RNAse R OS=Trichodesmium erythraeum (strain IMS101) GN=Tery_1511 PE=4 SV=1	Q115M8	32	43	36	42	33	30	28	41	36
ROK domain containing protein OS=Trichodesmium erythraeum (strain IMS101) GN=Tery_2875 PE=4 SV=1	Q110M6	6	4	5	3	4	2	1	3	2
RP ribonucleotide reductase-like OS=Trichodesmium erythraeum (strain IMS101) GN=Tery_0428 PE=4 SV=1	Q119D6	0	0	0	0	0	0	0	0	0
Rubredoxin OS=Trichodesmium erythraeum (strain IMS101) GN=Tery_3502 PE=3 SV=1	Q10YT2	11	9	10	4	9	11	5	7	7
S-(hydroxymethyl)glutathione dehydrogenase OS=Trichodesmium erythraeum (strain IMS101) GN=Tery_2840 PE=3 SV=1	Q110R0	3	6	3	5	5	2	3	5	0
S-adenosylmethionine:tRNA ribosyltransferase-isomerase OS=Trichodesmium erythraeum (strain IMS101) GN=queA PE=3 SV=1	Q118B2	0	0	0	0	0	2	0	0	0
S-formylglutathione hydrolase OS=Trichodesmium erythraeum (strain IMS101) GN=Tery_2838 PE=3 SV=1	Q110R2	0	0	0	1	0	0	0	0	0
S-layer-like region OS=Trichodesmium erythraeum (strain IMS101) GN=Tery_1054 PE=4 SV=1	Q116Z9	26	27	27	27	26	24	21	28	25
S-methyl-5'-thioadenosine phosphorylase OS=Trichodesmium erythraeum (strain IMS101) GN=mtnP PE=3 SV=1	Q10YC7	8	11	10	7	10	13	8	13	9
Saccharopine dehydrogenase OS=Trichodesmium erythraeum (strain IMS101) GN=Tery_4315 PE=4 SV=1	Q10WR4	0	0	0	0	0	0	0	0	0
Sec-independent protein translocase protein TatA OS=Trichodesmium erythraeum (strain IMS101) GN=tatA PE=3 SV=1	Q110N2	6	7	4	3	9	7	4	7	6
Sec-independent protein translocase protein TatC OS=Trichodesmium erythraeum (strain IMS101) GN=tatC PE=3 SV=1	Q114K5	1	0	0	0	0	0	0	0	0
Serine hydroxymethyltransferase OS=Trichodesmium erythraeum (strain IMS101) GN=glyA PE=3 SV=1	Q111H1	19	17	17	23	21	23	29	26	24
Serine phosphatase OS=Trichodesmium erythraeum (strain IMS101) GN=Tery_5014 PE=4 SV=1	Q10UZ8	19	17	20	22	19	12	11	18	18
Serine phosphatase OS=Trichodesmium erythraeum (strain IMS101) GN=Tery_5014 PE=4 SV=1	REVERSE_Q10UZ8	0	0	0	0	0	0	0	0	2
Serine--glyoxylate transaminase OS=Trichodesmium erythraeum (strain IMS101) GN=Tery_3167 PE=3 SV=1	Q10ZM9	70	71	74	59	67	63	67	72	60
Serine--tRNA ligase OS=Trichodesmium erythraeum (strain IMS101) GN=serS PE=3 SV=1	Q10YR2	6	14	14	11	14	7	9	11	13
Serine/threonine protein kinase OS=Trichodesmium erythraeum (strain IMS101) GN=Tery_0247 PE=4 SV=1	Q119U1	1	0	0	3	0	0	0	0	0
Serine/threonine protein kinase OS=Trichodesmium erythraeum (strain IMS101) GN=Tery_1036 PE=4 SV=1	Q117B6	0	1	0	0	0	0	0	0	0
Serine/threonine protein kinase OS=Trichodesmium erythraeum (strain IMS101) GN=Tery_1668 PE=4 SV=1	Q114Y5	0	0	0	0	0	0	0	0	0
Serine/threonine protein kinase OS=Trichodesmium erythraeum (strain IMS101) GN=Tery_2829 PE=4 SV=1	Q110S1	0	0	0	0	0	0	0	0	0
Serine/threonine protein kinase OS=Trichodesmium erythraeum (strain IMS101) GN=Tery_2831 PE=4 SV=1	Q110R9	0	0	0	0	0	0	0	0	0
Serine/threonine protein kinase OS=Trichodesmium erythraeum (strain IMS101) GN=Tery_3400 PE=4 SV=1	Q10Z23	0	0	0	0	0	0	0	0	0
Serine/threonine protein kinase OS=Trichodesmium erythraeum (strain IMS101) GN=Tery_3510 PE=4 SV=1	Q10YS4	1	1	1	0	1	2	2	0	1
Serine/threonine protein kinase OS=Trichodesmium erythraeum (strain IMS101) GN=Tery_4351 PE=4 SV=1	Q10WN1	0	0	0	0	0	0	0	0	0
Serine/threonine protein kinase with WD40 repeats OS=Trichodesmium erythraeum (strain IMS101) GN=Tery_0184 PE=4 SV=1	REVERSE_Q119Z9	0	0	0	0	0	0	0	2	0
Serum albumin OS=Homo sapiens GN=ALB PE=1 SV=2	P02768	0	0	0	0	0	0	0	3	0
SH3, type 3 OS=Trichodesmium erythraeum (strain IMS101) GN=Tery_1844 PE=4 SV=1	Q114H4	0	0	1	1	0	0	0	0	0
SH3, type 3 OS=Trichodesmium erythraeum (strain IMS101) GN=Tery_4656 PE=4 SV=1	Q10VU9	0	0	0	0	0	0	0	0	0
Shikimate dehydrogenase (NADP(+)) OS=Trichodesmium erythraeum (strain IMS101) GN=aroE PE=3 SV=1	Q113A7	3	3	6	4	6	3	3	3	3
Short-chain dehydrogenase/reductase SDR OS=Trichodesmium erythraeum (strain IMS101) GN=Tery_0698 PE=4 SV=1	Q118E1	2	4	3	5	3	2	0	5	0
Short-chain dehydrogenase/reductase SDR OS=Trichodesmium erythraeum (strain IMS101) GN=Tery_1795 PE=3 SV=1	Q114M0	8	9	10	5	8	6	8	9	5
Short-chain dehydrogenase/reductase SDR OS=Trichodesmium erythraeum (strain IMS101) GN=Tery_2630 PE=4 SV=1	Q111J9	0	0	0	0	0	0	0	1	0
Short-chain dehydrogenase/reductase SDR OS=Trichodesmium erythraeum (strain IMS101) GN=Tery_2914 PE=4 SV=1	Q110J2	15	21	19	18	18	15	12	18	17
Short-chain dehydrogenase/reductase SDR OS=Trichodesmium erythraeum (strain IMS101) GN=Tery_3453 PE=3 SV=1	Q10YX9	0	0	0	0	0	0	1	0	0
Short-chain dehydrogenase/reductase SDR OS=Trichodesmium erythraeum (strain IMS101) GN=Tery_3927 PE=3 SV=1	Q10XR6	10	11	12	7	8	7	7	10	9
Sigma 54 modulation protein / SSU ribosomal protein S30P OS=Trichodesmium erythraeum (strain IMS101) GN=Tery_3183 PE=4 SV=1	Q10ZL6	17	14	17	13	13	13	12	15	14
Signal peptidase I OS=Trichodesmium erythraeum (strain IMS101) GN=Tery_1310 PE=3 SV=1	Q116D9	0	0	0	0	0	0	0	0	0
Signal peptidase I OS=Trichodesmium erythraeum (strain IMS101) GN=Tery_2178 PE=3 SV=1	Q113B5	4	8	3	4	6	4	5	8	3
Signal recognition particle receptor FtsY OS=Trichodesmium erythraeum (strain IMS101) GN=ftsY PE=3 SV=1	Q118A5	18	18	15	15	16	14	9	17	14
Single-strand binding protein/Primosomal replication protein n OS=Trichodesmium erythraeum (strain IMS101) GN=Tery_3185 PE=4 SV=1	Q10ZL4	6	7	4	5	7	6	0	6	5
Single-stranded DNA-binding protein OS=Trichodesmium erythraeum (strain IMS101) GN=Tery_1149 PE=3 SV=1	Q116R3	10	12	12	10	8	12	8	12	10
Single-stranded nucleic acid binding R3H OS=Trichodesmium erythraeum (strain IMS101) GN=Tery_3015 PE=4 SV=1	Q110A4	2	0	0	2	0	1	0	1	1
SirA-like OS=Trichodesmium erythraeum (strain IMS101) GN=Tery_1752 PE=3 SV=1	Q114R2	3	3	3	3	3	2	0	4	2
Site-determining protein OS=Trichodesmium erythraeum (strain IMS101) GN=Tery_3383 PE=3 SV=1	Q10Z40	4	3	4	2	6	3	4	2	0
Small GTP-binding protein OS=Trichodesmium erythraeum (strain IMS101) GN=Tery_2771 PE=4 SV=1	Q110X0	1	1	1	0	1	0	0	0	0
Small GTP-binding protein OS=Trichodesmium erythraeum (strain IMS101) GN=Tery_3798 PE=4 SV=1	Q10Y31	0	0	0	0	0	0	0	0	0
SMP-30/Gluconolaconase/LRE-like region OS=Trichodesmium erythraeum (strain IMS101) GN=Tery_1771 PE=4 SV=1	Q114P3	0	3	0	1	0	0	0	2	0
Sodium/hydrogen exchanger OS=Trichodesmium erythraeum (strain IMS101) GN=Tery_0859 PE=3 SV=1	Q117Q7	0	0	0	0	0	0	0	0	0
Sodium/hydrogen exchanger OS=Trichodesmium erythraeum (strain IMS101) GN=Tery_1631 PE=4 SV=1	Q115B7	0	0	0	0	0	0	0	0	0
Spermidine/putrescine import ATP-binding protein PotA OS=Trichodesmium erythraeum (strain IMS101) GN=potA PE=3 SV=1	Q110U3	0	1	0	0	2	1	0	0	0
SPFH domain, Band 7 family protein OS=Trichodesmium erythraeum (strain IMS101) GN=Tery_1873 PE=4 SV=1	Q114E5	51	57	67	51	54	52	48	59	53
SPFH domain, Band 7 family protein OS=Trichodesmium erythraeum (strain IMS101) GN=Tery_1952 PE=4 SV=1	Q113W9	5	6	4	7	9	3	0	6	6
SPFH domain, Band 7 family protein OS=Trichodesmium erythraeum (strain IMS101) GN=Tery_4181 PE=4 SV=1	Q10X38	0	2	3	4	5	3	0	3	3
Squalene-hopene cyclase OS=Trichodesmium erythraeum (strain IMS101) GN=Tery_0727 PE=4 SV=1	Q118B5	12	12	10	11	11	11	9	11	10
SsrA-binding protein OS=Trichodesmium erythraeum (strain IMS101) GN=smpB PE=3 SV=1	Q112L2	0	0	0	0	0	0	0	1	0
SSS sodium solute transporter superfamily OS=Trichodesmium erythraeum (strain IMS101) GN=Tery_3406 PE=3 SV=1	Q10Z17	4	4	3	2	4	3	4	3	2
SSU ribosomal protein S1P OS=Trichodesmium erythraeum (strain IMS101) GN=Tery_2502 PE=4 SV=1	Q111W5	30	44	37	35	38	30	28	38	36
SSU ribosomal protein S1P OS=Trichodesmium erythraeum (strain IMS101) GN=Tery_4663 PE=4 SV=1	Q10VU3	88	89	83	80	80	77	59	86	67
Stress protein OS=Trichodesmium erythraeum (strain IMS101) GN=Tery_0707 PE=4 SV=1	Q118D3	6	6	5	5	4	6	5	7	5
Stress protein OS=Trichodesmium erythraeum (strain IMS101) GN=Tery_5053 PE=4 SV=1	Q10UW4	8	11	10	7	13	10	4	10	10
Stress protein OS=Trichodesmium erythraeum (strain IMS101) GN=Tery_5062 PE=4 SV=1	Q10UV8	46	48	37	46	47	45	46	48	50
Stress protein OS=Trichodesmium erythraeum (strain IMS101) GN=Tery_5063 PE=4 SV=1	Q10UV7	4	0	5	0	4	3	0	3	0
Substrate-binding region of ABC-type glycine betaine transport system OS=Trichodesmium erythraeum (strain IMS101) GN=Tery_1458 PE=4 SV=1	Q115S6	15	19	19	15	14	10	11	16	12
Substrate-binding region of ABC-type glycine betaine transport system OS=Trichodesmium erythraeum (strain IMS101) GN=Tery_1459 PE=4 SV=1	Q115S5	0	0	0	0	0	0	0	5	0
Succinate dehydrogenase iron-sulfur subunit OS=Trichodesmium erythraeum (strain IMS101) GN=Tery_3726 PE=3 SV=1	Q10Y92	0	0	0	1	0	0	0	0	1
Succinate dehydrogenase iron-sulfur subunit OS=Trichodesmium erythraeum (strain IMS101) GN=Tery_3726 PE=3 SV=1	REVERSE_Q10Y92	0	0	0	0	0	0	0	0	0
Succinate dehydrogenase subunit A OS=Trichodesmium erythraeum (strain IMS101) GN=Tery_2474 PE=4 SV=1	Q111Z1	0	0	0	0	0	0	0	0	0
Succinate dehydrogenase subunit C OS=Trichodesmium erythraeum (strain IMS101) GN=Tery_0453 PE=4 SV=1	Q119B2	0	0	0	0	1	0	0	0	0
Succinyl-CoA synthetase (ADP-forming) alpha subunit OS=Trichodesmium erythraeum (strain IMS101) GN=Tery_2751 PE=4 SV=1	Q110Z0	0	0	0	0	0	0	0	0	0
Succinyl-CoA synthetase (ADP-forming) beta subunit OS=Trichodesmium erythraeum (strain IMS101) GN=Tery_2750 PE=4 SV=1	Q110Z1	5	6	5	3	6	2	3	6	5
Succinylglutamate desuccinylase/aspartoacylase OS=Trichodesmium erythraeum (strain IMS101) GN=Tery_3439 PE=4 SV=1	Q10YZ2	11	9	13	9	11	10	3	11	8
Sugar fermentation stimulation protein homolog OS=Trichodesmium erythraeum (strain IMS101) GN=sfsA PE=3 SV=1	Q111B4	0	1	0	0	0	0	0	0	0
Sulfate adenylyltransferase OS=Trichodesmium erythraeum (strain IMS101) GN=sat PE=3 SV=1	Q111K4	36	34	34	29	29	29	26	40	24
Sulfite reductase (Ferredoxin) OS=Trichodesmium erythraeum (strain IMS101) GN=Tery_3544 PE=3 SV=1	Q10YP3	59	56	53	53	56	64	46	60	54
Sulfotransferase OS=Trichodesmium erythraeum (strain IMS101) GN=Tery_0274 PE=4 SV=1	Q119R8	1	0	0	0	1	1	0	0	0
Sulfotransferase OS=Trichodesmium erythraeum (strain IMS101) GN=Tery_1419 PE=4 SV=1	Q115V9	0	0	1	0	0	0	0	0	0
Sulfotransferase OS=Trichodesmium erythraeum (strain IMS101) GN=Tery_1481 PE=4 SV=1	Q115Q4	41	43	46	35	33	35	35	39	30
Sulfotransferase OS=Trichodesmium erythraeum (strain IMS101) GN=Tery_2110 PE=4 SV=1	Q113H8	3	5	2	4	3	3	2	5	3
Sulfotransferase OS=Trichodesmium erythraeum (strain IMS101) GN=Tery_3140 PE=4 SV=1	Q10ZQ4	0	0	0	0	0	0	0	0	0
Sulfotransferase OS=Trichodesmium erythraeum (strain IMS101) GN=Tery_4770 PE=4 SV=1	Q10VK1	0	0	0	0	0	0	0	0	0
Sulphate transporter OS=Trichodesmium erythraeum (strain IMS101) GN=Tery_1057 PE=3 SV=1	Q116Z6	6	8	7	6	5	8	8	9	7
Superfamily I DNA and RNA helicases and helicase subunits-like OS=Trichodesmium erythraeum (strain IMS101) GN=Tery_2554 PE=4 SV=1	Q111R9	0	0	0	0	0	0	0	0	0
Superoxide dismutase OS=Trichodesmium erythraeum (strain IMS101) GN=Tery_4533 PE=3 SV=1	Q10W61	1	2	1	0	0	0	0	0	0
Surface antigen (D15) OS=Trichodesmium erythraeum (strain IMS101) GN=Tery_4653 PE=4 SV=1	Q10VV1	9	10	9	13	10	11	6	13	13
Taurine dioxygenase OS=Trichodesmium erythraeum (strain IMS101) GN=Tery_3110 PE=4 SV=1	Q10ZT1	1	0	0	0	1	2	0	1	1
TENA/THI-4 protein OS=Trichodesmium erythraeum (strain IMS101) GN=Tery_0369 PE=4 SV=1	Q119I6	0	0	0	0	0	0	0	0	0
Tetratricopeptide region OS=Trichodesmium erythraeum (strain IMS101) GN=Tery_0555 PE=4 SV=1	Q118S1	0	0	0	0	0	0	0	0	0
Tetratricopeptide TPR_2 OS=Trichodesmium erythraeum (strain IMS101) GN=Tery_0529 PE=4 SV=1	REVERSE_Q118U3	1	3	2	0	0	1	0	0	0
Tetratricopeptide TPR_2 OS=Trichodesmium erythraeum (strain IMS101) GN=Tery_0607 PE=4 SV=1	Q118M3	2	4	2	3	4	3	3	4	2
Tetratricopeptide TPR_2 OS=Trichodesmium erythraeum (strain IMS101) GN=Tery_0626 PE=4 SV=1	Q118K6	2	8	6	3	3	4	2	4	4
Tetratricopeptide TPR_2 OS=Trichodesmium erythraeum (strain IMS101) GN=Tery_1102 PE=4 SV=1	Q116V7	3	1	2	1	3	3	0	4	5
Tetratricopeptide TPR_2 OS=Trichodesmium erythraeum (strain IMS101) GN=Tery_2167 PE=4 SV=1	Q113C4	1	1	0	0	0	0	0	1	0
Tetratricopeptide TPR_2 OS=Trichodesmium erythraeum (strain IMS101) GN=Tery_2387 PE=4 SV=1	Q112G9	3	4	4	2	6	0	1	3	1
Tetratricopeptide TPR_2 OS=Trichodesmium erythraeum (strain IMS101) GN=Tery_2395 PE=4 SV=1	Q112G1	5	8	8	9	6	5	5	7	6
Tetratricopeptide TPR_2 OS=Trichodesmium erythraeum (strain IMS101) GN=Tery_2671 PE=4 SV=1	Q111G1	0	0	0	0	0	0	0	0	0
Tetratricopeptide TPR_2 OS=Trichodesmium erythraeum (strain IMS101) GN=Tery_2742 PE=4 SV=1	Q110Z8	0	2	1	1	3	2	0	3	2
Tetratricopeptide TPR_2 OS=Trichodesmium erythraeum (strain IMS101) GN=Tery_3235 PE=4 SV=1	Q10ZH4	0	0	0	0	0	1	0	0	1
Tetratricopeptide TPR_2 OS=Trichodesmium erythraeum (strain IMS101) GN=Tery_3239 PE=4 SV=1	Q10ZH0	6	6	5	4	6	4	3	6	6
Tetratricopeptide TPR_2 OS=Trichodesmium erythraeum (strain IMS101) GN=Tery_3262 PE=4 SV=1	Q10ZF0	0	0	0	0	0	0	0	0	0
Tetratricopeptide TPR_2 OS=Trichodesmium erythraeum (strain IMS101) GN=Tery_3314 PE=4 SV=1	Q10ZA6	81	85	85	75	84	77	54	82	72
Tetratricopeptide TPR_2 OS=Trichodesmium erythraeum (strain IMS101) GN=Tery_3748 PE=4 SV=1	Q10Y74	0	0	0	0	0	0	0	0	0
Tetratricopeptide TPR_2 OS=Trichodesmium erythraeum (strain IMS101) GN=Tery_3996 PE=4 SV=1	Q10XK5	2	5	2	1	2	2	1	1	2
Tetratricopeptide TPR_2 OS=Trichodesmium erythraeum (strain IMS101) GN=Tery_4362 PE=4 SV=1	Q10WM0	0	0	0	0	0	0	0	2	0
Tetratricopeptide TPR_2 OS=Trichodesmium erythraeum (strain IMS101) GN=Tery_5036 PE=4 SV=1	Q10UX7	1	3	1	0	2	2	1	1	3
Thiamine biosynthesis protein ThiS OS=Trichodesmium erythraeum (strain IMS101) GN=Tery_2584 PE=4 SV=1	Q111P3	0	2	2	0	2	0	0	0	0
Thiamine-phosphate synthase OS=Trichodesmium erythraeum (strain IMS101) GN=thiE PE=3 SV=1	Q111P4	2	6	7	5	4	0	0	4	6
ThiamineS OS=Trichodesmium erythraeum (strain IMS101) GN=Tery_4347 PE=4 SV=1	Q10WN5	2	0	0	0	0	0	0	0	1
Thiazole synthase OS=Trichodesmium erythraeum (strain IMS101) GN=thiG PE=3 SV=1	Q112X4	8	12	15	10	15	9	8	10	12
ThiJ/PfpI OS=Trichodesmium erythraeum (strain IMS101) GN=Tery_5019 PE=4 SV=1	Q10UZ3	27	31	31	38	35	39	32	44	29
Thioesterase OS=Trichodesmium erythraeum (strain IMS101) GN=Tery_1343 PE=4 SV=1	Q116B6	8	7	6	8	8	10	7	9	8
Thioredoxin domain OS=Trichodesmium erythraeum (strain IMS101) GN=Tery_2864 PE=4 SV=1	Q110N7	1	2	1	3	4	2	3	1	4
Thioredoxin OS=Trichodesmium erythraeum (strain IMS101) GN=Tery_0945 PE=3 SV=1	Q117I6	4	5	5	6	6	5	4	5	5
Thioredoxin OS=Trichodesmium erythraeum (strain IMS101) GN=Tery_3311 PE=3 SV=1	Q10ZA9	70	71	65	65	64	66	53	71	62
Thioredoxin OS=Trichodesmium erythraeum (strain IMS101) GN=Tery_3312 PE=3 SV=1	Q10ZA8	58	60	53	56	54	58	53	61	52
Thioredoxin-disulfide reductase OS=Trichodesmium erythraeum (strain IMS101) GN=Tery_1699 PE=4 SV=1	Q114W0	12	19	16	14	13	12	9	16	14
Threonine synthase OS=Trichodesmium erythraeum (strain IMS101) GN=Tery_0140 PE=3 SV=1	Q11A39	3	4	7	7	9	7	4	10	5
Threonine--tRNA ligase OS=Trichodesmium erythraeum (strain IMS101) GN=thrS PE=3 SV=1	Q115S7	12	12	16	14	8	10	2	16	6
Thymidylate kinase OS=Trichodesmium erythraeum (strain IMS101) GN=tmk PE=3 SV=1	Q115I0	0	0	0	0	2	0	0	0	0
Thymidylate synthase, flavin-dependent OS=Trichodesmium erythraeum (strain IMS101) GN=Tery_2082 PE=4 SV=1	Q113K1	0	0	0	0	1	1	0	2	0
Tic22-like OS=Trichodesmium erythraeum (strain IMS101) GN=Tery_1641 PE=4 SV=1	Q115A9	12	12	11	10	11	9	8	10	10
TM2 domain containing protein+B7201 OS=Trichodesmium erythraeum (strain IMS101) GN=Tery_0888 PE=4 SV=1	Q117N5	0	0	0	0	0	0	0	0	0
TM2 domain containing protein+B7201 OS=Trichodesmium erythraeum (strain IMS101) GN=Tery_2399 PE=4 SV=1	Q112F7	0	1	0	0	0	0	0	0	0
Tocopherol cyclase OS=Trichodesmium erythraeum (strain IMS101) GN=Tery_1802 PE=4 SV=1	Q114L4	1	2	0	0	0	0	0	0	1
TonB family protein OS=Trichodesmium erythraeum (strain IMS101) GN=Tery_1560 PE=4 SV=1	Q115I4	0	2	0	2	2	1	1	3	0
TPR repeat containing protein OS=Trichodesmium erythraeum (strain IMS101) GN=Tery_2763 PE=4 SV=1	Q110X8	0	3	4	1	4	0	0	0	3
TPR repeat OS=Trichodesmium erythraeum (strain IMS101) GN=Tery_0291 PE=4 SV=1	Q119Q3	0	1	0	1	0	1	1	0	1
TPR repeat OS=Trichodesmium erythraeum (strain IMS101) GN=Tery_0481 PE=4 SV=1	REVERSE_Q118Y7	0	0	0	0	0	0	0	0	0
TPR repeat OS=Trichodesmium erythraeum (strain IMS101) GN=Tery_0977 PE=4 SV=1	Q117G6	0	0	0	0	1	0	0	0	0
TPR repeat OS=Trichodesmium erythraeum (strain IMS101) GN=Tery_1009 PE=4 SV=1	Q117D8	13	11	15	8	7	10	7	9	8
TPR repeat OS=Trichodesmium erythraeum (strain IMS101) GN=Tery_1403 PE=4 SV=1	REVERSE_Q115X2	0	1	0	0	0	0	0	0	0
TPR repeat OS=Trichodesmium erythraeum (strain IMS101) GN=Tery_1518 PE=4 SV=1	Q115M2	0	0	0	0	0	0	0	0	0
TPR repeat OS=Trichodesmium erythraeum (strain IMS101) GN=Tery_1546 PE=4 SV=1	Q115J8	0	4	7	0	5	0	0	0	2
TPR repeat OS=Trichodesmium erythraeum (strain IMS101) GN=Tery_1883 PE=4 SV=1	Q114D5	0	0	0	2	0	0	0	0	0
TPR repeat OS=Trichodesmium erythraeum (strain IMS101) GN=Tery_2481 PE=4 SV=1	Q111Y5	14	22	19	19	22	18	11	14	16
TPR repeat OS=Trichodesmium erythraeum (strain IMS101) GN=Tery_2765 PE=4 SV=1	Q110X6	0	0	0	0	0	0	0	0	0
TPR repeat OS=Trichodesmium erythraeum (strain IMS101) GN=Tery_3950 PE=4 SV=1	Q10XP6	15	18	12	9	12	10	9	15	10
TPR repeat OS=Trichodesmium erythraeum (strain IMS101) GN=Tery_4460 PE=4 SV=1	Q10WC7	2	4	6	4	4	0	0	4	3
TPR repeat OS=Trichodesmium erythraeum (strain IMS101) GN=Tery_4723 PE=4 SV=1	Q10VN9	72	71	71	67	72	61	57	65	64
TPR repeat OS=Trichodesmium erythraeum (strain IMS101) GN=Tery_4945 PE=4 SV=1	Q10V65	0	0	2	0	1	0	0	2	0
TPR repeat OS=Trichodesmium erythraeum (strain IMS101) GN=Tery_4958 PE=4 SV=1	Q10V52	5	0	0	4	4	0	4	0	4
TPR repeat OS=Trichodesmium erythraeum (strain IMS101) GN=Tery_4959 PE=4 SV=1	Q10V51	0	3	0	0	0	0	3	3	0
Trans-hexaprenyltranstransferase OS=Trichodesmium erythraeum (strain IMS101) GN=Tery_0157 PE=3 SV=1	Q11A23	0	2	0	0	3	0	0	0	1
Transaldolase OS=Trichodesmium erythraeum (strain IMS101) GN=Tery_0519 PE=4 SV=1	Q118V2	6	5	9	8	6	7	3	12	6
Transcription termination/antitermination protein NusA OS=Trichodesmium erythraeum (strain IMS101) GN=nusA PE=3 SV=1	Q10XM1	9	11	11	7	9	10	8	11	8
Transcription termination/antitermination protein NusG OS=Trichodesmium erythraeum (strain IMS101) GN=nusG PE=3 SV=1	Q119S5	16	18	13	11	12	11	14	17	13
Transcription-repair-coupling factor OS=Trichodesmium erythraeum (strain IMS101) GN=mfd PE=3 SV=1	Q114Y2	0	0	0	0	0	0	0	0	0
Transcriptional activator, TenA family OS=Trichodesmium erythraeum (strain IMS101) GN=Tery_0805 PE=4 SV=1	Q117V2	0	0	0	0	0	0	0	0	0
Transcriptional regulator, AbrB family OS=Trichodesmium erythraeum (strain IMS101) GN=Tery_0216 PE=4 SV=1	Q119W9	20	20	20	21	16	20	18	20	18
Transcriptional regulator, Crp/Fnr family OS=Trichodesmium erythraeum (strain IMS101) GN=Tery_1557 PE=4 SV=1	Q115I7	1	0	0	0	0	0	0	0	0
Transcriptional regulator, LysR family OS=Trichodesmium erythraeum (strain IMS101) GN=Tery_2009 PE=4 SV=1	Q113R7	23	22	18	21	30	23	15	23	19
Transcriptional regulator, TetR family OS=Trichodesmium erythraeum (strain IMS101) GN=Tery_1790 PE=4 SV=1	Q114M5	0	1	0	0	0	0	0	0	0
Transcriptional regulator, XRE family OS=Trichodesmium erythraeum (strain IMS101) GN=Tery_4444 PE=4 SV=1	Q10WE3	3	2	0	0	2	0	0	2	3
Transferase hexapeptide repeat OS=Trichodesmium erythraeum (strain IMS101) GN=Tery_3435 PE=4 SV=1	Q10YZ6	0	1	0	1	0	1	0	1	0
Transferase hexapeptide repeat OS=Trichodesmium erythraeum (strain IMS101) GN=Tery_3847 PE=4 SV=1	Q10XY5	0	6	6	6	5	7	2	7	4
Transferase hexapeptide repeat OS=Trichodesmium erythraeum (strain IMS101) GN=Tery_4486 PE=4 SV=1	Q10WA2	2	1	1	1	2	1	1	2	2
Transglutaminase-like OS=Trichodesmium erythraeum (strain IMS101) GN=Tery_0156 PE=4 SV=1	Q11A24	0	0	0	0	0	0	0	0	0
Transglutaminase-like OS=Trichodesmium erythraeum (strain IMS101) GN=Tery_0156 PE=4 SV=1	REVERSE_Q11A24	0	0	0	0	0	0	0	0	0
Transglutaminase-like OS=Trichodesmium erythraeum (strain IMS101) GN=Tery_1534 PE=4 SV=1	Q115K9	7	9	11	9	7	8	8	13	12
Transketolase OS=Trichodesmium erythraeum (strain IMS101) GN=Tery_0450 PE=3 SV=1	Q119B5	211	224	226	202	216	201	215	232	185
Transketolase OS=Trichodesmium erythraeum (strain IMS101) GN=Tery_0450 PE=3 SV=1	REVERSE_Q119B5	0	0	0	0	0	1	0	0	0
Transketolase, central region OS=Trichodesmium erythraeum (strain IMS101) GN=Tery_5078 PE=4 SV=1	Q10UU3	40	38	47	48	41	43	47	49	45
Translation factor SUA5 OS=Trichodesmium erythraeum (strain IMS101) GN=Tery_0651 PE=4 SV=1	Q118I4	1	0	1	1	0	1	0	2	1
Translation initiation factor 1 (EIF-1/SUI1) OS=Trichodesmium erythraeum (strain IMS101) GN=Tery_3343 PE=4 SV=1	Q10Z78	0	0	0	0	0	0	0	0	0
Translation initiation factor IF-1 OS=Trichodesmium erythraeum (strain IMS101) GN=infA PE=3 SV=1	Q110C7	7	7	8	8	0	7	7	6	6
Translation initiation factor IF-2 OS=Trichodesmium erythraeum (strain IMS101) GN=infB PE=3 SV=1	Q10XM3	77	83	84	72	69	71	38	75	71
Translation initiation factor IF-3 OS=Trichodesmium erythraeum (strain IMS101) GN=infC PE=3 SV=1	Q117J9	24	21	26	24	20	18	11	22	21
Transport permease protein OS=Trichodesmium erythraeum (strain IMS101) GN=Tery_1079 PE=3 SV=1	Q116X6	3	0	0	0	2	0	0	2	0
Transposase OS=Trichodesmium erythraeum (strain IMS101) GN=Tery_0200 PE=4 SV=1	Q10VJ2	0	0	0	0	0	0	0	0	0
TRAP dicarboxylate transporter-DctP subunit OS=Trichodesmium erythraeum (strain IMS101) GN=Tery_4421 PE=3 SV=1	Q10WG5	1	1	1	0	1	0	0	0	1
TRAP dicarboxylate transporter-DctP subunit OS=Trichodesmium erythraeum (strain IMS101) GN=Tery_4421 PE=3 SV=1	REVERSE_Q10WG5	0	0	0	0	0	0	0	0	0
Triosephosphate isomerase OS=Trichodesmium erythraeum (strain IMS101) GN=tpiA PE=3 SV=1	Q115Y7	26	27	32	23	21	23	22	29	19
TrkA-N OS=Trichodesmium erythraeum (strain IMS101) GN=Tery_3882 PE=4 SV=1	Q10XV5	0	0	0	0	2	0	0	1	0
TrkA-N OS=Trichodesmium erythraeum (strain IMS101) GN=Tery_4032 PE=4 SV=1	Q10XH4	0	0	0	0	0	0	0	0	0
tRNA pseudouridine synthase B OS=Trichodesmium erythraeum (strain IMS101) GN=truB PE=3 SV=1	Q112N2	0	0	0	0	0	0	0	0	0
tRNA uridine 5-carboxymethylaminomethyl modification enzyme MnmG OS=Trichodesmium erythraeum (strain IMS101) GN=mnmG PE=3 SV=1	Q110Q9	0	0	0	0	0	0	0	0	0
tRNA-specific 2-thiouridylase MnmA OS=Trichodesmium erythraeum (strain IMS101) GN=mnmA PE=3 SV=1	Q118B7	1	0	0	0	0	0	0	0	0
Tryptophan synthase alpha chain OS=Trichodesmium erythraeum (strain IMS101) GN=trpA PE=3 SV=1	Q10W95	10	10	11	4	9	8	5	9	7
Tryptophan synthase beta chain OS=Trichodesmium erythraeum (strain IMS101) GN=trpB PE=3 SV=1	Q118P8	11	10	11	12	13	12	8	13	12
Two component transcriptional regulator, LuxR family OS=Trichodesmium erythraeum (strain IMS101) GN=Tery_4491 PE=4 SV=1	Q10W97	10	9	8	10	9	7	8	10	11
Two component transcriptional regulator, winged helix family OS=Trichodesmium erythraeum (strain IMS101) GN=Tery_0954 PE=4 SV=1	Q117I0	18	20	17	21	17	21	19	24	20
Two component transcriptional regulator, winged helix family OS=Trichodesmium erythraeum (strain IMS101) GN=Tery_4937 PE=4 SV=1	Q10V72	5	9	5	6	7	8	6	13	5
Type II and III secretion system protein OS=Trichodesmium erythraeum (strain IMS101) GN=Tery_1609 PE=3 SV=1	Q115D6	2	6	4	4	4	2	1	5	6
Type II secretion system protein E OS=Trichodesmium erythraeum (strain IMS101) GN=Tery_1748 PE=4 SV=1	Q114R6	4	5	4	6	5	6	3	7	5
Type III restriction enzyme, res subunit OS=Trichodesmium erythraeum (strain IMS101) GN=Tery_2422 PE=4 SV=1	Q112D5	2	1	0	2	1	0	0	0	1
Type IV pilus assembly protein PilM OS=Trichodesmium erythraeum (strain IMS101) GN=Tery_1605 PE=4 SV=1	Q115E0	2	4	5	0	3	2	0	6	3
Type IV pilus assembly protein PilO OS=Trichodesmium erythraeum (strain IMS101) GN=Tery_1607 PE=4 SV=1	Q115D8	1	0	0	0	1	0	0	0	0
Tyrosine--tRNA ligase OS=Trichodesmium erythraeum (strain IMS101) GN=tyrS PE=3 SV=1	Q119C0	9	6	7	5	8	7	6	9	7
UDP-3-O-acylglucosamine N-acyltransferase OS=Trichodesmium erythraeum (strain IMS101) GN=lpxD PE=3 SV=1	Q10VF5	0	0	0	0	1	0	0	0	0
UDP-glucose 6-dehydrogenase OS=Trichodesmium erythraeum (strain IMS101) GN=Tery_2477 PE=3 SV=1	Q111Y8	30	28	33	30	24	30	20	33	28
UDP-N-Acetylglucosamine 2-epimerase OS=Trichodesmium erythraeum (strain IMS101) GN=Tery_2401 PE=3 SV=1	Q112F5	0	0	1	0	0	0	0	0	0
UDP-N-acetylmuramoyl-L-alanyl-D-glutamate--2,6-diaminopimelate ligase OS=Trichodesmium erythraeum (strain IMS101) GN=murE PE=3 SV=1	Q10X66	9	9	7	4	8	2	2	7	5
UDP-N-acetylmuramoyl-tripeptide--D-alanyl-D-alanine ligase OS=Trichodesmium erythraeum (strain IMS101) GN=murF PE=3 SV=1	Q118X3	2	1	4	2	2	0	1	3	1
UDP-N-acetylmuramoylalanine--D-glutamate ligase OS=Trichodesmium erythraeum (strain IMS101) GN=murD PE=3 SV=1	Q10WA5	7	6	4	4	9	4	4	5	4
Uncharacterized protein OS=Trichodesmium erythraeum (strain IMS101) GN=Tery_0011 PE=4 SV=1	REVERSE_Q11AD8	0	0	0	0	0	1	0	0	0
Uncharacterized protein OS=Trichodesmium erythraeum (strain IMS101) GN=Tery_0033 PE=4 SV=1	Q11AC1	14	15	19	12	14	12	14	15	15
Uncharacterized protein OS=Trichodesmium erythraeum (strain IMS101) GN=Tery_0034 PE=4 SV=1	Q11AC0	7	9	8	12	12	9	7	10	10
Uncharacterized protein OS=Trichodesmium erythraeum (strain IMS101) GN=Tery_0068 PE=4 SV=1	Q11A97	14	13	11	16	18	16	12	12	12
Uncharacterized protein OS=Trichodesmium erythraeum (strain IMS101) GN=Tery_0090 PE=4 SV=1	Q11A78	2	2	1	0	3	1	1	1	0
Uncharacterized protein OS=Trichodesmium erythraeum (strain IMS101) GN=Tery_0094 PE=4 SV=1	Q11A75	0	0	1	2	2	1	0	0	0
Uncharacterized protein OS=Trichodesmium erythraeum (strain IMS101) GN=Tery_0107 PE=4 SV=1	Q11A68	14	15	15	11	12	12	11	14	13
Uncharacterized protein OS=Trichodesmium erythraeum (strain IMS101) GN=Tery_0134 PE=4 SV=1	Q11A45	0	0	1	0	1	0	0	0	1
Uncharacterized protein OS=Trichodesmium erythraeum (strain IMS101) GN=Tery_0151 PE=4 SV=1	Q11A28	12	14	7	14	21	10	10	16	14
Uncharacterized protein OS=Trichodesmium erythraeum (strain IMS101) GN=Tery_0152 PE=4 SV=1	Q11A27	10	11	10	9	11	8	4	8	8
Uncharacterized protein OS=Trichodesmium erythraeum (strain IMS101) GN=Tery_0153 PE=4 SV=1	Q11A26	1	0	0	1	1	1	0	0	1
Uncharacterized protein OS=Trichodesmium erythraeum (strain IMS101) GN=Tery_0159 PE=4 SV=1	Q11A21	0	0	0	0	0	0	0	2	0
Uncharacterized protein OS=Trichodesmium erythraeum (strain IMS101) GN=Tery_0160 PE=4 SV=1	Q11A20	1	2	1	0	0	0	0	2	0
Uncharacterized protein OS=Trichodesmium erythraeum (strain IMS101) GN=Tery_0170 PE=4 SV=1	Q11A12	1	1	2	0	0	0	0	0	0
Uncharacterized protein OS=Trichodesmium erythraeum (strain IMS101) GN=Tery_0172 PE=4 SV=1	Q11A10	1	0	0	0	2	1	0	1	1
Uncharacterized protein OS=Trichodesmium erythraeum (strain IMS101) GN=Tery_0177 PE=4 SV=1	Q11A05	2	3	1	2	2	2	3	1	2
Uncharacterized protein OS=Trichodesmium erythraeum (strain IMS101) GN=Tery_0187 PE=4 SV=1	Q119Z6	0	0	0	0	1	0	0	0	0
Uncharacterized protein OS=Trichodesmium erythraeum (strain IMS101) GN=Tery_0193 PE=4 SV=1	Q119Z1	2	2	2	3	3	4	1	4	3
Uncharacterized protein OS=Trichodesmium erythraeum (strain IMS101) GN=Tery_0194 PE=4 SV=1	Q119Z0	0	0	0	0	2	0	0	0	0
Uncharacterized protein OS=Trichodesmium erythraeum (strain IMS101) GN=Tery_0196 PE=4 SV=1	Q119Y9	0	0	0	0	0	0	0	0	0
Uncharacterized protein OS=Trichodesmium erythraeum (strain IMS101) GN=Tery_0198 PE=4 SV=1	Q119Y7	0	1	0	0	1	1	0	0	1
Uncharacterized protein OS=Trichodesmium erythraeum (strain IMS101) GN=Tery_0206 PE=4 SV=1	Q119X9	0	4	0	1	2	0	0	1	3
Uncharacterized protein OS=Trichodesmium erythraeum (strain IMS101) GN=Tery_0211 PE=4 SV=1	Q119X4	19	17	14	15	16	16	14	22	14
Uncharacterized protein OS=Trichodesmium erythraeum (strain IMS101) GN=Tery_0213 PE=4 SV=1	Q119X2	9	10	9	8	10	7	5	13	8
Uncharacterized protein OS=Trichodesmium erythraeum (strain IMS101) GN=Tery_0229 PE=4 SV=1	Q119V7	3	3	1	3	4	2	1	4	5
Uncharacterized protein OS=Trichodesmium erythraeum (strain IMS101) GN=Tery_0260 PE=4 SV=1	Q119T0	18	19	17	15	13	14	7	12	14
Uncharacterized protein OS=Trichodesmium erythraeum (strain IMS101) GN=Tery_0269 PE=4 SV=1	Q119S2	0	2	3	3	3	0	0	2	3
Uncharacterized protein OS=Trichodesmium erythraeum (strain IMS101) GN=Tery_0292 PE=4 SV=1	Q119Q2	0	0	0	0	0	0	0	0	0
Uncharacterized protein OS=Trichodesmium erythraeum (strain IMS101) GN=Tery_0310 PE=4 SV=1	Q119N7	1	2	1	2	3	3	0	4	0
Uncharacterized protein OS=Trichodesmium erythraeum (strain IMS101) GN=Tery_0316 PE=4 SV=1	Q119N3	0	0	2	2	2	2	0	3	2
Uncharacterized protein OS=Trichodesmium erythraeum (strain IMS101) GN=Tery_0322 PE=4 SV=1	Q119M7	0	0	0	0	0	0	0	0	0
Uncharacterized protein OS=Trichodesmium erythraeum (strain IMS101) GN=Tery_0323 PE=4 SV=1	Q119M6	2	1	1	4	4	2	0	4	2
Uncharacterized protein OS=Trichodesmium erythraeum (strain IMS101) GN=Tery_0373 PE=4 SV=1	Q119I2	27	22	25	26	23	29	21	33	26
Uncharacterized protein OS=Trichodesmium erythraeum (strain IMS101) GN=Tery_0383 PE=4 SV=1	Q119H3	1	2	1	0	2	0	0	0	1
Uncharacterized protein OS=Trichodesmium erythraeum (strain IMS101) GN=Tery_0414 PE=4 SV=1	Q119E7	0	0	0	0	0	0	0	1	0
Uncharacterized protein OS=Trichodesmium erythraeum (strain IMS101) GN=Tery_0436 PE=4 SV=1	Q119C9	4	4	0	0	6	3	0	4	4
Uncharacterized protein OS=Trichodesmium erythraeum (strain IMS101) GN=Tery_0447 PE=4 SV=1	Q119B8	1	0	0	0	1	0	0	0	0
Uncharacterized protein OS=Trichodesmium erythraeum (strain IMS101) GN=Tery_0493 PE=4 SV=1	Q118X5	32	30	34	25	31	27	17	29	29
Uncharacterized protein OS=Trichodesmium erythraeum (strain IMS101) GN=Tery_0501 PE=4 SV=1	Q118W8	0	0	0	2	0	0	0	0	0
Uncharacterized protein OS=Trichodesmium erythraeum (strain IMS101) GN=Tery_0502 PE=4 SV=1	Q118W7	4	5	5	5	5	5	0	7	4
Uncharacterized protein OS=Trichodesmium erythraeum (strain IMS101) GN=Tery_0503 PE=4 SV=1	REVERSE_Q118W6	0	0	0	0	0	0	0	0	0
Uncharacterized protein OS=Trichodesmium erythraeum (strain IMS101) GN=Tery_0505 PE=4 SV=1	Q118W4	0	0	0	0	0	0	0	0	0
Uncharacterized protein OS=Trichodesmium erythraeum (strain IMS101) GN=Tery_0518 PE=4 SV=1	Q118V3	0	0	0	0	0	0	0	0	0
Uncharacterized protein OS=Trichodesmium erythraeum (strain IMS101) GN=Tery_0525 PE=4 SV=1	Q118U7	0	0	0	0	0	0	0	0	0
Uncharacterized protein OS=Trichodesmium erythraeum (strain IMS101) GN=Tery_0530 PE=4 SV=1	Q118U2	0	0	0	0	1	0	0	0	0
Uncharacterized protein OS=Trichodesmium erythraeum (strain IMS101) GN=Tery_0545 PE=4 SV=1	Q118S9	9	9	9	6	9	3	2	9	7
Uncharacterized protein OS=Trichodesmium erythraeum (strain IMS101) GN=Tery_0575 PE=4 SV=1	Q118Q4	6	7	5	5	5	8	4	10	5
Uncharacterized protein OS=Trichodesmium erythraeum (strain IMS101) GN=Tery_0595 PE=4 SV=1	Q118N5	0	0	0	1	1	2	1	1	0
Uncharacterized protein OS=Trichodesmium erythraeum (strain IMS101) GN=Tery_0598 PE=4 SV=1	Q118N2	0	0	0	0	1	0	0	1	0
Uncharacterized protein OS=Trichodesmium erythraeum (strain IMS101) GN=Tery_0612 PE=4 SV=1	Q118L8	0	0	0	0	0	0	0	1	0
Uncharacterized protein OS=Trichodesmium erythraeum (strain IMS101) GN=Tery_0629 PE=4 SV=1	Q118K3	9	9	9	4	5	8	7	0	5
Uncharacterized protein OS=Trichodesmium erythraeum (strain IMS101) GN=Tery_0648 PE=4 SV=1	Q118I6	5	4	0	3	4	0	6	4	3
Uncharacterized protein OS=Trichodesmium erythraeum (strain IMS101) GN=Tery_0653 PE=4 SV=1	Q118I2	5	6	5	3	5	4	3	2	4
Uncharacterized protein OS=Trichodesmium erythraeum (strain IMS101) GN=Tery_0655 PE=4 SV=1	Q118I0	14	15	13	11	13	15	12	12	12
Uncharacterized protein OS=Trichodesmium erythraeum (strain IMS101) GN=Tery_0672 PE=4 SV=1	Q118G5	0	0	0	0	0	0	0	0	0
Uncharacterized protein OS=Trichodesmium erythraeum (strain IMS101) GN=Tery_0702 PE=4 SV=1	Q118D8	1	2	2	4	2	1	0	0	1
Uncharacterized protein OS=Trichodesmium erythraeum (strain IMS101) GN=Tery_0703 PE=4 SV=1	Q118D7	0	0	0	0	0	0	0	0	0
Uncharacterized protein OS=Trichodesmium erythraeum (strain IMS101) GN=Tery_0761 PE=4 SV=1	Q117Y6	0	0	0	0	0	0	0	0	0
Uncharacterized protein OS=Trichodesmium erythraeum (strain IMS101) GN=Tery_0764 PE=4 SV=1	Q117Y3	5	5	4	2	4	2	4	0	4
Uncharacterized protein OS=Trichodesmium erythraeum (strain IMS101) GN=Tery_0829 PE=4 SV=1	Q117T1	0	1	0	0	0	0	0	0	0
Uncharacterized protein OS=Trichodesmium erythraeum (strain IMS101) GN=Tery_0830 PE=4 SV=1	Q117T0	14	21	20	23	23	21	16	20	18
Uncharacterized protein OS=Trichodesmium erythraeum (strain IMS101) GN=Tery_0869 PE=4 SV=1	Q117Q0	3	2	3	2	3	1	2	3	0
Uncharacterized protein OS=Trichodesmium erythraeum (strain IMS101) GN=Tery_0895 PE=4 SV=1	Q117M8	0	0	0	0	0	0	0	0	0
Uncharacterized protein OS=Trichodesmium erythraeum (strain IMS101) GN=Tery_0919 PE=4 SV=1	Q117K7	0	0	0	0	1	0	0	0	0
Uncharacterized protein OS=Trichodesmium erythraeum (strain IMS101) GN=Tery_1021 PE=4 SV=1	Q117C7	0	0	1	0	0	2	0	0	0
Uncharacterized protein OS=Trichodesmium erythraeum (strain IMS101) GN=Tery_1040 PE=4 SV=1	Q117B2	22	21	25	18	19	18	11	20	18
Uncharacterized protein OS=Trichodesmium erythraeum (strain IMS101) GN=Tery_1046 PE=4 SV=1	Q117A6	0	0	3	0	0	0	0	0	3
Uncharacterized protein OS=Trichodesmium erythraeum (strain IMS101) GN=Tery_1048 PE=4 SV=1	Q117A4	0	2	0	0	2	2	2	2	0
Uncharacterized protein OS=Trichodesmium erythraeum (strain IMS101) GN=Tery_1076 PE=4 SV=1	Q116X9	13	14	12	6	9	12	5	8	10
Uncharacterized protein OS=Trichodesmium erythraeum (strain IMS101) GN=Tery_1103 PE=4 SV=1	Q116V6	0	1	1	1	1	0	2	1	0
Uncharacterized protein OS=Trichodesmium erythraeum (strain IMS101) GN=Tery_1104 PE=4 SV=1	Q116V5	17	21	20	20	22	18	12	21	20
Uncharacterized protein OS=Trichodesmium erythraeum (strain IMS101) GN=Tery_1132 PE=4 SV=1	Q116T0	0	0	0	0	0	1	0	0	0
Uncharacterized protein OS=Trichodesmium erythraeum (strain IMS101) GN=Tery_1147 PE=4 SV=1	Q116R5	2	4	4	2	2	0	1	2	2
Uncharacterized protein OS=Trichodesmium erythraeum (strain IMS101) GN=Tery_1159 PE=4 SV=1	Q116Q4	1	2	3	2	2	2	0	3	2
Uncharacterized protein OS=Trichodesmium erythraeum (strain IMS101) GN=Tery_1164 PE=4 SV=1	Q116P9	21	19	25	17	16	14	17	14	18
Uncharacterized protein OS=Trichodesmium erythraeum (strain IMS101) GN=Tery_1169 PE=4 SV=1	Q116P4	0	0	4	0	0	3	0	4	0
Uncharacterized protein OS=Trichodesmium erythraeum (strain IMS101) GN=Tery_1180 PE=4 SV=1	Q116N6	0	0	0	0	0	0	0	0	0
Uncharacterized protein OS=Trichodesmium erythraeum (strain IMS101) GN=Tery_1181 PE=4 SV=1	Q116N5	1	0	0	0	0	0	0	1	0
Uncharacterized protein OS=Trichodesmium erythraeum (strain IMS101) GN=Tery_1193 PE=4 SV=1	Q116M4	2	2	3	2	0	0	0	2	3
Uncharacterized protein OS=Trichodesmium erythraeum (strain IMS101) GN=Tery_1239 PE=4 SV=1	Q116I5	0	0	0	0	0	0	0	0	0
Uncharacterized protein OS=Trichodesmium erythraeum (strain IMS101) GN=Tery_1292 PE=4 SV=1	Q116F1	0	0	0	0	0	0	0	0	0
Uncharacterized protein OS=Trichodesmium erythraeum (strain IMS101) GN=Tery_1301 PE=4 SV=1	Q116E5	2	3	3	5	5	4	5	5	5
Uncharacterized protein OS=Trichodesmium erythraeum (strain IMS101) GN=Tery_1305 PE=4 SV=1	Q116E3	0	0	0	0	0	0	0	0	0
Uncharacterized protein OS=Trichodesmium erythraeum (strain IMS101) GN=Tery_1354 PE=4 SV=1	Q116A7	0	0	0	0	0	0	0	0	0
Uncharacterized protein OS=Trichodesmium erythraeum (strain IMS101) GN=Tery_1442 PE=4 SV=1	Q115T8	0	0	0	0	0	0	0	0	0
Uncharacterized protein OS=Trichodesmium erythraeum (strain IMS101) GN=Tery_1453 PE=4 SV=1	Q115T1	1	0	2	0	0	0	0	0	0
Uncharacterized protein OS=Trichodesmium erythraeum (strain IMS101) GN=Tery_1456 PE=4 SV=1	Q115S8	0	0	0	0	0	0	0	0	0
Uncharacterized protein OS=Trichodesmium erythraeum (strain IMS101) GN=Tery_1468 PE=4 SV=1	Q115R6	19	18	17	18	18	17	13	21	14
Uncharacterized protein OS=Trichodesmium erythraeum (strain IMS101) GN=Tery_1486 PE=4 SV=1	Q115Q0	17	21	17	14	17	11	11	16	15
Uncharacterized protein OS=Trichodesmium erythraeum (strain IMS101) GN=Tery_1495 PE=4 SV=1	Q115P2	0	0	0	0	0	0	0	0	0
Uncharacterized protein OS=Trichodesmium erythraeum (strain IMS101) GN=Tery_1500 PE=4 SV=1	Q115N8	0	0	0	0	0	0	0	0	0
Uncharacterized protein OS=Trichodesmium erythraeum (strain IMS101) GN=Tery_1502 PE=4 SV=1	Q115N6	0	2	0	0	4	2	0	3	2
Uncharacterized protein OS=Trichodesmium erythraeum (strain IMS101) GN=Tery_1507 PE=4 SV=1	Q115N1	0	0	0	0	1	2	0	1	1
Uncharacterized protein OS=Trichodesmium erythraeum (strain IMS101) GN=Tery_1512 PE=4 SV=1	Q115M7	2	1	2	2	0	1	0	1	2
Uncharacterized protein OS=Trichodesmium erythraeum (strain IMS101) GN=Tery_1525 PE=4 SV=1	Q115L6	8	5	8	4	6	2	5	10	6
Uncharacterized protein OS=Trichodesmium erythraeum (strain IMS101) GN=Tery_1547 PE=4 SV=1	Q115J7	22	24	13	19	25	18	16	25	26
Uncharacterized protein OS=Trichodesmium erythraeum (strain IMS101) GN=Tery_1548 PE=4 SV=1	Q115J6	7	9	7	6	9	7	6	7	7
Uncharacterized protein OS=Trichodesmium erythraeum (strain IMS101) GN=Tery_1561 PE=4 SV=1	Q115I3	2	1	2	2	3	1	0	2	1
Uncharacterized protein OS=Trichodesmium erythraeum (strain IMS101) GN=Tery_1566 PE=4 SV=1	Q115H8	0	0	0	0	0	0	0	0	0
Uncharacterized protein OS=Trichodesmium erythraeum (strain IMS101) GN=Tery_1568 PE=4 SV=1	Q115H6	0	0	0	0	0	0	0	0	0
Uncharacterized protein OS=Trichodesmium erythraeum (strain IMS101) GN=Tery_1600 PE=4 SV=1	Q115E5	8	8	5	7	7	6	0	7	9
Uncharacterized protein OS=Trichodesmium erythraeum (strain IMS101) GN=Tery_1681 PE=4 SV=1	Q114X2	0	0	0	0	0	0	0	0	0
Uncharacterized protein OS=Trichodesmium erythraeum (strain IMS101) GN=Tery_1706 PE=4 SV=1	Q114V3	0	0	0	0	0	0	0	0	0
Uncharacterized protein OS=Trichodesmium erythraeum (strain IMS101) GN=Tery_1726 PE=4 SV=1	Q114T5	2	1	2	2	2	2	0	2	1
Uncharacterized protein OS=Trichodesmium erythraeum (strain IMS101) GN=Tery_1734 PE=4 SV=1	Q114S8	0	1	0	0	0	0	0	0	0
Uncharacterized protein OS=Trichodesmium erythraeum (strain IMS101) GN=Tery_1735 PE=4 SV=1	Q114S7	1	1	0	1	2	0	0	2	1
Uncharacterized protein OS=Trichodesmium erythraeum (strain IMS101) GN=Tery_1744 PE=4 SV=1	Q114S0	0	0	0	1	0	0	0	0	1
Uncharacterized protein OS=Trichodesmium erythraeum (strain IMS101) GN=Tery_1762 PE=4 SV=1	Q114Q2	2	1	2	2	2	0	2	1	1
Uncharacterized protein OS=Trichodesmium erythraeum (strain IMS101) GN=Tery_1764 PE=4 SV=1	Q114Q0	10	11	14	11	14	12	6	12	10
Uncharacterized protein OS=Trichodesmium erythraeum (strain IMS101) GN=Tery_1765 PE=4 SV=1	Q114P9	18	19	20	14	16	15	15	16	14
Uncharacterized protein OS=Trichodesmium erythraeum (strain IMS101) GN=Tery_1782 PE=4 SV=1	Q114N3	0	1	0	0	0	1	0	0	0
Uncharacterized protein OS=Trichodesmium erythraeum (strain IMS101) GN=Tery_1783 PE=4 SV=1	Q114N2	5	3	6	4	5	3	0	6	3
Uncharacterized protein OS=Trichodesmium erythraeum (strain IMS101) GN=Tery_1785 PE=4 SV=1	Q114N0	8	4	4	5	11	6	2	7	6
Uncharacterized protein OS=Trichodesmium erythraeum (strain IMS101) GN=Tery_1787 PE=4 SV=1	REVERSE_Q114M8	0	0	0	0	0	0	0	0	0
Uncharacterized protein OS=Trichodesmium erythraeum (strain IMS101) GN=Tery_1794 PE=4 SV=1	Q114M1	59	57	54	49	53	49	47	51	54
Uncharacterized protein OS=Trichodesmium erythraeum (strain IMS101) GN=Tery_1800 PE=4 SV=1	Q114L5	1	0	1	2	0	3	1	0	2
Uncharacterized protein OS=Trichodesmium erythraeum (strain IMS101) GN=Tery_1803 PE=4 SV=1	Q114L3	0	0	0	0	0	0	0	0	0
Uncharacterized protein OS=Trichodesmium erythraeum (strain IMS101) GN=Tery_1808 PE=4 SV=1	Q114K9	14	14	11	18	18	17	17	16	19
Uncharacterized protein OS=Trichodesmium erythraeum (strain IMS101) GN=Tery_1809 PE=4 SV=1	Q114K8	67	67	68	61	68	63	56	61	64
Uncharacterized protein OS=Trichodesmium erythraeum (strain IMS101) GN=Tery_1810 PE=4 SV=1	Q114K7	66	65	59	71	70	59	45	71	68
Uncharacterized protein OS=Trichodesmium erythraeum (strain IMS101) GN=Tery_1814 PE=4 SV=1	Q114K3	1	1	2	0	0	1	0	0	0
Uncharacterized protein OS=Trichodesmium erythraeum (strain IMS101) GN=Tery_1824 PE=4 SV=1	Q114J3	5	5	2	5	8	6	0	5	6
Uncharacterized protein OS=Trichodesmium erythraeum (strain IMS101) GN=Tery_1825 PE=4 SV=1	Q114J2	4	8	4	6	8	9	6	7	7
Uncharacterized protein OS=Trichodesmium erythraeum (strain IMS101) GN=Tery_1830 PE=4 SV=1	Q114I8	25	25	26	23	26	20	19	21	24
Uncharacterized protein OS=Trichodesmium erythraeum (strain IMS101) GN=Tery_1897 PE=4 SV=1	Q114C2	0	0	1	0	0	0	0	0	0
Uncharacterized protein OS=Trichodesmium erythraeum (strain IMS101) GN=Tery_1897 PE=4 SV=1	REVERSE_Q114C2	0	0	0	0	0	0	0	0	0
Uncharacterized protein OS=Trichodesmium erythraeum (strain IMS101) GN=Tery_1899 PE=4 SV=1	REVERSE_Q114C0	0	0	1	0	0	1	0	0	2
Uncharacterized protein OS=Trichodesmium erythraeum (strain IMS101) GN=Tery_1916 PE=4 SV=1	Q114A3	0	0	0	0	0	0	0	0	0
Uncharacterized protein OS=Trichodesmium erythraeum (strain IMS101) GN=Tery_1933 PE=4 SV=1	Q113Y6	0	0	1	0	0	0	0	0	0
Uncharacterized protein OS=Trichodesmium erythraeum (strain IMS101) GN=Tery_1943 PE=4 SV=1	REVERSE_Q113X7	0	0	0	0	0	0	0	0	0
Uncharacterized protein OS=Trichodesmium erythraeum (strain IMS101) GN=Tery_1979 PE=4 SV=1	Q113U4	0	0	0	0	0	0	0	1	0
Uncharacterized protein OS=Trichodesmium erythraeum (strain IMS101) GN=Tery_1979 PE=4 SV=1	REVERSE_Q113U4	0	0	0	0	0	0	0	0	0
Uncharacterized protein OS=Trichodesmium erythraeum (strain IMS101) GN=Tery_1989 PE=4 SV=1	Q113T4	26	29	27	27	33	25	22	27	23
Uncharacterized protein OS=Trichodesmium erythraeum (strain IMS101) GN=Tery_1992 PE=4 SV=1	Q113T1	19	14	12	10	14	10	12	10	14
Uncharacterized protein OS=Trichodesmium erythraeum (strain IMS101) GN=Tery_2071 PE=4 SV=1	Q113L2	0	0	0	0	0	0	0	0	0
Uncharacterized protein OS=Trichodesmium erythraeum (strain IMS101) GN=Tery_2076 PE=4 SV=1	Q113K7	1	0	1	0	0	0	0	0	0
Uncharacterized protein OS=Trichodesmium erythraeum (strain IMS101) GN=Tery_2087 PE=4 SV=1	Q113J7	0	1	0	1	1	0	0	0	0
Uncharacterized protein OS=Trichodesmium erythraeum (strain IMS101) GN=Tery_2117 PE=4 SV=1	Q113H2	1	1	1	1	0	0	0	0	0
Uncharacterized protein OS=Trichodesmium erythraeum (strain IMS101) GN=Tery_2131 PE=4 SV=1	Q113F9	0	1	1	0	0	0	0	0	0
Uncharacterized protein OS=Trichodesmium erythraeum (strain IMS101) GN=Tery_2162 PE=4 SV=1	Q113C9	0	4	0	0	0	0	0	0	0
Uncharacterized protein OS=Trichodesmium erythraeum (strain IMS101) GN=Tery_2185 PE=4 SV=1	Q113A8	0	1	3	0	3	0	0	3	3
Uncharacterized protein OS=Trichodesmium erythraeum (strain IMS101) GN=Tery_2188 PE=4 SV=1	Q113A6	19	21	19	21	17	18	12	19	15
Uncharacterized protein OS=Trichodesmium erythraeum (strain IMS101) GN=Tery_2195 PE=4 SV=1	Q113A0	0	0	0	0	0	0	0	0	0
Uncharacterized protein OS=Trichodesmium erythraeum (strain IMS101) GN=Tery_2220 PE=4 SV=1	Q112X5	3	1	0	0	0	2	0	2	2
Uncharacterized protein OS=Trichodesmium erythraeum (strain IMS101) GN=Tery_2228 PE=4 SV=1	Q112W7	0	0	0	0	0	1	0	1	0
Uncharacterized protein OS=Trichodesmium erythraeum (strain IMS101) GN=Tery_2230 PE=4 SV=1	Q112W5	0	0	0	0	0	0	0	0	0
Uncharacterized protein OS=Trichodesmium erythraeum (strain IMS101) GN=Tery_2236 PE=4 SV=1	Q112V9	0	0	0	0	0	0	0	0	0
Uncharacterized protein OS=Trichodesmium erythraeum (strain IMS101) GN=Tery_2237 PE=4 SV=1	Q112V8	0	1	2	0	0	0	0	0	0
Uncharacterized protein OS=Trichodesmium erythraeum (strain IMS101) GN=Tery_2238 PE=4 SV=1	Q112V7	19	11	14	5	21	19	10	12	20
Uncharacterized protein OS=Trichodesmium erythraeum (strain IMS101) GN=Tery_2247 PE=4 SV=1	Q112U8	4	3	4	2	5	0	3	3	0
Uncharacterized protein OS=Trichodesmium erythraeum (strain IMS101) GN=Tery_2251 PE=4 SV=1	Q112U4	13	12	11	10	8	11	6	9	10
Uncharacterized protein OS=Trichodesmium erythraeum (strain IMS101) GN=Tery_2254 PE=4 SV=1	Q112U1	2	4	4	3	0	1	2	0	3
Uncharacterized protein OS=Trichodesmium erythraeum (strain IMS101) GN=Tery_2255 PE=4 SV=1	Q112U0	29	31	31	30	39	31	16	37	39
Uncharacterized protein OS=Trichodesmium erythraeum (strain IMS101) GN=Tery_2279 PE=4 SV=1	Q112R9	0	0	0	0	0	1	0	0	0
Uncharacterized protein OS=Trichodesmium erythraeum (strain IMS101) GN=Tery_2284 PE=4 SV=1	Q112R5	6	7	4	3	6	7	0	7	6
Uncharacterized protein OS=Trichodesmium erythraeum (strain IMS101) GN=Tery_2286 PE=4 SV=1	Q112R3	0	0	0	0	0	0	0	0	0
Uncharacterized protein OS=Trichodesmium erythraeum (strain IMS101) GN=Tery_2317 PE=4 SV=1	Q112N4	0	3	0	1	3	1	3	4	2
Uncharacterized protein OS=Trichodesmium erythraeum (strain IMS101) GN=Tery_2328 PE=4 SV=1	Q112M4	0	0	0	0	0	0	0	0	1
Uncharacterized protein OS=Trichodesmium erythraeum (strain IMS101) GN=Tery_2340 PE=4 SV=1	Q112L4	4	5	2	5	7	3	1	8	3
Uncharacterized protein OS=Trichodesmium erythraeum (strain IMS101) GN=Tery_2343 PE=4 SV=1	Q112L1	3	4	4	4	4	4	0	4	6
Uncharacterized protein OS=Trichodesmium erythraeum (strain IMS101) GN=Tery_2351 PE=4 SV=1	Q112K3	1	0	0	0	0	0	1	0	0
Uncharacterized protein OS=Trichodesmium erythraeum (strain IMS101) GN=Tery_2355 PE=4 SV=1	Q112J9	10	5	5	6	4	3	4	3	4
Uncharacterized protein OS=Trichodesmium erythraeum (strain IMS101) GN=Tery_2357 PE=4 SV=1	Q112J7	1	0	1	0	2	0	0	1	0
Uncharacterized protein OS=Trichodesmium erythraeum (strain IMS101) GN=Tery_2359 PE=4 SV=1	Q112J5	2	2	3	1	2	1	0	3	1
Uncharacterized protein OS=Trichodesmium erythraeum (strain IMS101) GN=Tery_2363 PE=4 SV=1	Q112J1	9	11	7	10	11	11	6	11	9
Uncharacterized protein OS=Trichodesmium erythraeum (strain IMS101) GN=Tery_2367 PE=4 SV=1	Q112I7	3	3	4	0	1	4	0	3	2
Uncharacterized protein OS=Trichodesmium erythraeum (strain IMS101) GN=Tery_2373 PE=4 SV=1	Q112I1	0	0	0	0	0	0	0	0	0
Uncharacterized protein OS=Trichodesmium erythraeum (strain IMS101) GN=Tery_2381 PE=4 SV=1	Q112H3	3	5	2	6	6	6	2	7	6
Uncharacterized protein OS=Trichodesmium erythraeum (strain IMS101) GN=Tery_2394 PE=4 SV=1	Q112G2	2	4	2	2	3	1	1	3	2
Uncharacterized protein OS=Trichodesmium erythraeum (strain IMS101) GN=Tery_2415 PE=4 SV=1	Q112E2	5	8	11	7	9	7	3	6	8
Uncharacterized protein OS=Trichodesmium erythraeum (strain IMS101) GN=Tery_2426 PE=4 SV=1	Q112D1	1	1	2	0	1	1	0	2	0
Uncharacterized protein OS=Trichodesmium erythraeum (strain IMS101) GN=Tery_2431 PE=4 SV=1	Q112C7	2	5	2	0	3	3	0	2	2
Uncharacterized protein OS=Trichodesmium erythraeum (strain IMS101) GN=Tery_2460 PE=4 SV=1	Q112A2	0	0	0	0	0	0	0	0	0
Uncharacterized protein OS=Trichodesmium erythraeum (strain IMS101) GN=Tery_2469 PE=4 SV=1	Q111Z5	5	5	6	2	6	3	5	7	6
Uncharacterized protein OS=Trichodesmium erythraeum (strain IMS101) GN=Tery_2476 PE=4 SV=1	Q111Y9	0	0	0	0	0	0	0	0	0
Uncharacterized protein OS=Trichodesmium erythraeum (strain IMS101) GN=Tery_2479 PE=4 SV=1	Q111Y6	1	0	1	0	0	0	0	0	0
Uncharacterized protein OS=Trichodesmium erythraeum (strain IMS101) GN=Tery_2508 PE=4 SV=1	Q111W0	14	12	15	12	13	12	9	12	12
Uncharacterized protein OS=Trichodesmium erythraeum (strain IMS101) GN=Tery_2520 PE=4 SV=1	Q111U8	0	0	1	0	0	0	0	2	0
Uncharacterized protein OS=Trichodesmium erythraeum (strain IMS101) GN=Tery_2521 PE=4 SV=1	Q111U7	1	0	0	0	0	0	0	0	0
Uncharacterized protein OS=Trichodesmium erythraeum (strain IMS101) GN=Tery_2525 PE=4 SV=1	Q111U4	7	6	5	5	9	6	6	7	10
Uncharacterized protein OS=Trichodesmium erythraeum (strain IMS101) GN=Tery_2542 PE=4 SV=1	Q111T1	0	0	1	0	0	0	0	0	0
Uncharacterized protein OS=Trichodesmium erythraeum (strain IMS101) GN=Tery_2546 PE=4 SV=1	Q111S7	2	4	2	4	3	1	0	2	0
Uncharacterized protein OS=Trichodesmium erythraeum (strain IMS101) GN=Tery_2548 PE=4 SV=1	Q111S5	0	0	0	0	0	0	0	0	0
Uncharacterized protein OS=Trichodesmium erythraeum (strain IMS101) GN=Tery_2568 PE=4 SV=1	Q111Q7	2	3	2	3	3	3	3	0	0
Uncharacterized protein OS=Trichodesmium erythraeum (strain IMS101) GN=Tery_2575 PE=4 SV=1	Q111Q2	3	1	2	2	3	2	2	4	2
Uncharacterized protein OS=Trichodesmium erythraeum (strain IMS101) GN=Tery_2576 PE=4 SV=1	Q111Q1	4	4	2	5	4	3	1	4	3
Uncharacterized protein OS=Trichodesmium erythraeum (strain IMS101) GN=Tery_2644 PE=4 SV=1	Q111I5	0	0	1	0	0	0	0	0	0
Uncharacterized protein OS=Trichodesmium erythraeum (strain IMS101) GN=Tery_2655 PE=4 SV=1	Q111H5	7	7	7	4	7	0	0	7	4
Uncharacterized protein OS=Trichodesmium erythraeum (strain IMS101) GN=Tery_2690 PE=4 SV=1	Q111E5	2	2	0	2	0	0	0	0	0
Uncharacterized protein OS=Trichodesmium erythraeum (strain IMS101) GN=Tery_2698 PE=4 SV=1	Q111D7	2	0	0	0	2	0	0	0	0
Uncharacterized protein OS=Trichodesmium erythraeum (strain IMS101) GN=Tery_2711 PE=4 SV=1	Q111C5	1	2	0	0	2	2	1	1	1
Uncharacterized protein OS=Trichodesmium erythraeum (strain IMS101) GN=Tery_2715 PE=4 SV=1	Q111C1	0	0	0	0	3	0	0	0	0
Uncharacterized protein OS=Trichodesmium erythraeum (strain IMS101) GN=Tery_2720 PE=4 SV=1	Q111B8	0	0	0	0	0	0	0	0	0
Uncharacterized protein OS=Trichodesmium erythraeum (strain IMS101) GN=Tery_2733 PE=4 SV=1	Q111A7	14	17	14	12	17	17	12	13	16
Uncharacterized protein OS=Trichodesmium erythraeum (strain IMS101) GN=Tery_2737 PE=4 SV=1	Q111A3	0	3	0	0	0	0	0	2	0
Uncharacterized protein OS=Trichodesmium erythraeum (strain IMS101) GN=Tery_2745 PE=4 SV=1	Q110Z5	12	12	14	12	15	10	13	14	15
Uncharacterized protein OS=Trichodesmium erythraeum (strain IMS101) GN=Tery_2755 PE=4 SV=1	Q110Y6	0	1	0	1	1	1	0	1	0
Uncharacterized protein OS=Trichodesmium erythraeum (strain IMS101) GN=Tery_2761 PE=4 SV=1	Q110Y0	0	0	0	0	0	0	0	0	0
Uncharacterized protein OS=Trichodesmium erythraeum (strain IMS101) GN=Tery_2770 PE=4 SV=1	Q110X1	0	0	0	0	0	0	0	0	0
Uncharacterized protein OS=Trichodesmium erythraeum (strain IMS101) GN=Tery_2785 PE=4 SV=1	Q110V8	6	7	6	4	4	4	3	4	5
Uncharacterized protein OS=Trichodesmium erythraeum (strain IMS101) GN=Tery_2786 PE=4 SV=1	Q110V7	11	12	11	14	13	14	10	13	13
Uncharacterized protein OS=Trichodesmium erythraeum (strain IMS101) GN=Tery_2806 PE=4 SV=1	Q110U2	0	0	1	0	0	1	0	1	0
Uncharacterized protein OS=Trichodesmium erythraeum (strain IMS101) GN=Tery_2807 PE=4 SV=1	Q110U1	1	0	1	0	1	1	0	0	0
Uncharacterized protein OS=Trichodesmium erythraeum (strain IMS101) GN=Tery_2820 PE=4 SV=1	Q110S8	1	0	0	0	0	0	0	0	0
Uncharacterized protein OS=Trichodesmium erythraeum (strain IMS101) GN=Tery_2822 PE=4 SV=1	Q110S6	8	10	8	8	14	8	4	7	5
Uncharacterized protein OS=Trichodesmium erythraeum (strain IMS101) GN=Tery_2832 PE=4 SV=1	Q110R8	1	0	2	0	0	0	0	0	0
Uncharacterized protein OS=Trichodesmium erythraeum (strain IMS101) GN=Tery_2873 PE=4 SV=1	REVERSE_Q110M8	0	0	0	0	0	0	0	0	0
Uncharacterized protein OS=Trichodesmium erythraeum (strain IMS101) GN=Tery_2876 PE=4 SV=1	Q110M5	0	0	0	0	0	0	0	0	0
Uncharacterized protein OS=Trichodesmium erythraeum (strain IMS101) GN=Tery_2882 PE=4 SV=1	Q110M0	2	3	2	4	2	3	4	4	5
Uncharacterized protein OS=Trichodesmium erythraeum (strain IMS101) GN=Tery_2886 PE=4 SV=1	Q110L7	8	12	6	12	11	10	6	12	9
Uncharacterized protein OS=Trichodesmium erythraeum (strain IMS101) GN=Tery_2890 PE=4 SV=1	Q110L4	18	0	19	0	18	18	0	0	18
Uncharacterized protein OS=Trichodesmium erythraeum (strain IMS101) GN=Tery_2897 PE=4 SV=1	Q110K9	15	15	14	12	15	10	11	17	15
Uncharacterized protein OS=Trichodesmium erythraeum (strain IMS101) GN=Tery_2900 PE=4 SV=1	Q110K6	21	17	21	24	26	22	16	23	14
Uncharacterized protein OS=Trichodesmium erythraeum (strain IMS101) GN=Tery_2918 PE=4 SV=1	Q110I9	19	18	13	25	24	19	19	24	18
Uncharacterized protein OS=Trichodesmium erythraeum (strain IMS101) GN=Tery_2931 PE=4 SV=1	Q110H9	0	0	0	0	0	0	0	0	0
Uncharacterized protein OS=Trichodesmium erythraeum (strain IMS101) GN=Tery_2943 PE=4 SV=1	Q110G7	5	0	6	3	5	4	0	6	5
Uncharacterized protein OS=Trichodesmium erythraeum (strain IMS101) GN=Tery_2960 PE=4 SV=1	Q110F3	45	40	37	43	43	39	43	42	35
Uncharacterized protein OS=Trichodesmium erythraeum (strain IMS101) GN=Tery_2975 PE=4 SV=1	Q110E1	1	3	0	3	0	1	0	2	4
Uncharacterized protein OS=Trichodesmium erythraeum (strain IMS101) GN=Tery_3039 PE=4 SV=1	Q10ZY4	7	7	6	4	7	4	6	5	8
Uncharacterized protein OS=Trichodesmium erythraeum (strain IMS101) GN=Tery_3051 PE=4 SV=1	Q10ZX5	7	5	6	6	5	6	1	4	4
Uncharacterized protein OS=Trichodesmium erythraeum (strain IMS101) GN=Tery_3068 PE=4 SV=1	Q10ZW2	2	1	1	1	1	1	0	0	1
Uncharacterized protein OS=Trichodesmium erythraeum (strain IMS101) GN=Tery_3104 PE=4 SV=1	Q10ZT7	0	2	1	2	1	0	0	3	2
Uncharacterized protein OS=Trichodesmium erythraeum (strain IMS101) GN=Tery_3107 PE=4 SV=1	Q10ZT4	0	0	0	1	0	0	0	0	3
Uncharacterized protein OS=Trichodesmium erythraeum (strain IMS101) GN=Tery_3108 PE=4 SV=1	Q10ZT3	20	17	12	13	14	13	10	13	14
Uncharacterized protein OS=Trichodesmium erythraeum (strain IMS101) GN=Tery_3109 PE=4 SV=1	Q10ZT2	1	0	0	2	1	1	0	0	0
Uncharacterized protein OS=Trichodesmium erythraeum (strain IMS101) GN=Tery_3124 PE=4 SV=1	Q10ZR8	4	6	0	4	9	6	6	5	9
Uncharacterized protein OS=Trichodesmium erythraeum (strain IMS101) GN=Tery_3125 PE=4 SV=1	Q10ZR7	3	6	1	3	5	2	5	5	4
Uncharacterized protein OS=Trichodesmium erythraeum (strain IMS101) GN=Tery_3131 PE=4 SV=1	Q10ZR3	6	3	5	3	3	4	3	5	7
Uncharacterized protein OS=Trichodesmium erythraeum (strain IMS101) GN=Tery_3143 PE=4 SV=1	Q10ZQ1	0	0	0	0	0	0	0	0	0
Uncharacterized protein OS=Trichodesmium erythraeum (strain IMS101) GN=Tery_3158 PE=4 SV=1	Q10ZN8	3	4	4	3	3	3	3	5	2
Uncharacterized protein OS=Trichodesmium erythraeum (strain IMS101) GN=Tery_3159 PE=4 SV=1	Q10ZN7	8	5	5	5	7	4	2	10	5
Uncharacterized protein OS=Trichodesmium erythraeum (strain IMS101) GN=Tery_3160 PE=4 SV=1	Q10ZN6	9	7	7	6	7	5	2	7	5
Uncharacterized protein OS=Trichodesmium erythraeum (strain IMS101) GN=Tery_3168 PE=4 SV=1	Q10ZM8	0	1	0	0	0	0	0	0	0
Uncharacterized protein OS=Trichodesmium erythraeum (strain IMS101) GN=Tery_3205 PE=4 SV=1	Q10ZJ9	10	7	7	6	9	4	0	6	3
Uncharacterized protein OS=Trichodesmium erythraeum (strain IMS101) GN=Tery_3214 PE=4 SV=1	Q10ZJ1	0	0	0	0	0	0	0	0	0
Uncharacterized protein OS=Trichodesmium erythraeum (strain IMS101) GN=Tery_3231 PE=4 SV=1	Q10ZH6	0	0	0	0	0	0	0	0	0
Uncharacterized protein OS=Trichodesmium erythraeum (strain IMS101) GN=Tery_3237 PE=4 SV=1	Q10ZH2	6	7	7	5	7	7	6	9	4
Uncharacterized protein OS=Trichodesmium erythraeum (strain IMS101) GN=Tery_3250 PE=4 SV=1	Q10ZG0	6	4	4	4	3	5	3	3	3
Uncharacterized protein OS=Trichodesmium erythraeum (strain IMS101) GN=Tery_3259 PE=4 SV=1	Q10ZF2	2	6	4	3	2	1	2	1	3
Uncharacterized protein OS=Trichodesmium erythraeum (strain IMS101) GN=Tery_3277 PE=4 SV=1	Q10ZD5	0	0	0	0	0	0	0	0	0
Uncharacterized protein OS=Trichodesmium erythraeum (strain IMS101) GN=Tery_3289 PE=4 SV=1	Q10ZC5	3	2	1	4	5	3	1	5	2
Uncharacterized protein OS=Trichodesmium erythraeum (strain IMS101) GN=Tery_3307 PE=4 SV=1	Q10ZB1	0	0	0	0	0	0	0	0	0
Uncharacterized protein OS=Trichodesmium erythraeum (strain IMS101) GN=Tery_3329 PE=4 SV=1	Q10Z92	2	2	1	2	3	0	1	0	2
Uncharacterized protein OS=Trichodesmium erythraeum (strain IMS101) GN=Tery_3329 PE=4 SV=1	REVERSE_Q10Z92	0	0	0	0	0	0	0	0	0
Uncharacterized protein OS=Trichodesmium erythraeum (strain IMS101) GN=Tery_3349 PE=4 SV=1	Q10Z73	13	12	13	8	10	7	10	10	8
Uncharacterized protein OS=Trichodesmium erythraeum (strain IMS101) GN=Tery_3364 PE=4 SV=1	Q10Z58	0	0	0	0	0	0	0	0	0
Uncharacterized protein OS=Trichodesmium erythraeum (strain IMS101) GN=Tery_3370 PE=4 SV=1	Q10Z52	6	6	5	6	6	6	2	6	6
Uncharacterized protein OS=Trichodesmium erythraeum (strain IMS101) GN=Tery_3389 PE=4 SV=1	Q10Z34	19	24	21	16	16	19	20	19	19
Uncharacterized protein OS=Trichodesmium erythraeum (strain IMS101) GN=Tery_3390 PE=4 SV=1	Q10Z33	7	7	6	6	6	4	3	6	8
Uncharacterized protein OS=Trichodesmium erythraeum (strain IMS101) GN=Tery_3392 PE=4 SV=1	Q10Z31	2	0	1	1	2	0	0	2	2
Uncharacterized protein OS=Trichodesmium erythraeum (strain IMS101) GN=Tery_3393 PE=4 SV=1	Q10Z30	0	0	0	0	0	0	0	0	0
Uncharacterized protein OS=Trichodesmium erythraeum (strain IMS101) GN=Tery_3398 PE=4 SV=1	Q10Z25	3	4	5	1	2	2	0	1	3
Uncharacterized protein OS=Trichodesmium erythraeum (strain IMS101) GN=Tery_3399 PE=4 SV=1	Q10Z24	3	0	4	0	3	0	0	0	0
Uncharacterized protein OS=Trichodesmium erythraeum (strain IMS101) GN=Tery_3401 PE=4 SV=1	Q10Z22	8	7	6	11	8	10	10	12	10
Uncharacterized protein OS=Trichodesmium erythraeum (strain IMS101) GN=Tery_3424 PE=4 SV=1	Q10Z04	12	9	8	11	16	12	11	16	9
Uncharacterized protein OS=Trichodesmium erythraeum (strain IMS101) GN=Tery_3444 PE=4 SV=1	Q10YY7	0	0	0	0	0	0	0	0	0
Uncharacterized protein OS=Trichodesmium erythraeum (strain IMS101) GN=Tery_3463 PE=4 SV=1	Q10YX0	0	0	0	0	0	0	0	0	0
Uncharacterized protein OS=Trichodesmium erythraeum (strain IMS101) GN=Tery_3464 PE=4 SV=1	Q10YW9	0	0	1	1	0	1	1	1	0
Uncharacterized protein OS=Trichodesmium erythraeum (strain IMS101) GN=Tery_3479 PE=4 SV=1	Q10YV5	6	4	3	5	3	4	4	4	5
Uncharacterized protein OS=Trichodesmium erythraeum (strain IMS101) GN=Tery_3483 PE=4 SV=1	Q10YV1	9	10	6	10	13	9	12	13	9
Uncharacterized protein OS=Trichodesmium erythraeum (strain IMS101) GN=Tery_3496 PE=4 SV=1	Q10YT8	0	0	0	0	0	0	0	0	0
Uncharacterized protein OS=Trichodesmium erythraeum (strain IMS101) GN=Tery_3508 PE=4 SV=1	Q10YS6	61	59	65	53	66	62	49	60	54
Uncharacterized protein OS=Trichodesmium erythraeum (strain IMS101) GN=Tery_3541 PE=4 SV=1	Q10YP6	2	2	0	0	1	2	1	3	2
Uncharacterized protein OS=Trichodesmium erythraeum (strain IMS101) GN=Tery_3542 PE=4 SV=1	Q10YP5	13	21	15	17	16	16	12	19	14
Uncharacterized protein OS=Trichodesmium erythraeum (strain IMS101) GN=Tery_3543 PE=4 SV=1	Q10YP4	2	0	2	1	3	2	0	0	2
Uncharacterized protein OS=Trichodesmium erythraeum (strain IMS101) GN=Tery_3548 PE=4 SV=1	Q10YP0	28	30	30	29	35	29	17	35	28
Uncharacterized protein OS=Trichodesmium erythraeum (strain IMS101) GN=Tery_3558 PE=4 SV=1	Q10YN1	0	0	0	0	0	0	0	0	0
Uncharacterized protein OS=Trichodesmium erythraeum (strain IMS101) GN=Tery_3565 PE=4 SV=1	Q10YM5	7	10	6	6	10	13	7	12	9
Uncharacterized protein OS=Trichodesmium erythraeum (strain IMS101) GN=Tery_3566 PE=4 SV=1	Q10YM4	0	0	0	0	0	0	0	0	0
Uncharacterized protein OS=Trichodesmium erythraeum (strain IMS101) GN=Tery_3568 PE=4 SV=1	Q10YM2	0	0	0	1	0	1	0	0	0
Uncharacterized protein OS=Trichodesmium erythraeum (strain IMS101) GN=Tery_3572 PE=4 SV=1	Q10YL8	10	9	14	9	13	14	12	12	13
Uncharacterized protein OS=Trichodesmium erythraeum (strain IMS101) GN=Tery_3618 PE=4 SV=1	Q10YI5	0	0	0	0	0	0	0	1	0
Uncharacterized protein OS=Trichodesmium erythraeum (strain IMS101) GN=Tery_3619 PE=4 SV=1	Q10YI4	1	0	0	0	0	2	1	2	1
Uncharacterized protein OS=Trichodesmium erythraeum (strain IMS101) GN=Tery_3633 PE=4 SV=1	Q10YH6	22	21	22	21	22	24	17	27	21
Uncharacterized protein OS=Trichodesmium erythraeum (strain IMS101) GN=Tery_3659 PE=4 SV=1	Q10YF3	9	11	11	10	13	9	12	15	7
Uncharacterized protein OS=Trichodesmium erythraeum (strain IMS101) GN=Tery_3662 PE=4 SV=1	Q10YF0	0	0	0	0	0	0	0	0	0
Uncharacterized protein OS=Trichodesmium erythraeum (strain IMS101) GN=Tery_3701 PE=4 SV=1	Q10YB4	0	0	0	0	0	0	0	0	0
Uncharacterized protein OS=Trichodesmium erythraeum (strain IMS101) GN=Tery_3709 PE=4 SV=1	Q10YA6	0	0	1	1	1	2	0	3	1
Uncharacterized protein OS=Trichodesmium erythraeum (strain IMS101) GN=Tery_3770 PE=4 SV=1	Q10Y56	7	5	4	1	4	3	0	4	2
Uncharacterized protein OS=Trichodesmium erythraeum (strain IMS101) GN=Tery_3785 PE=4 SV=1	Q10Y42	1	0	1	0	0	0	0	1	0
Uncharacterized protein OS=Trichodesmium erythraeum (strain IMS101) GN=Tery_3789 PE=4 SV=1	Q10Y39	0	0	0	0	0	0	0	0	0
Uncharacterized protein OS=Trichodesmium erythraeum (strain IMS101) GN=Tery_3815 PE=4 SV=1	Q10Y15	29	33	28	32	34	33	30	38	34
Uncharacterized protein OS=Trichodesmium erythraeum (strain IMS101) GN=Tery_3816 PE=4 SV=1	Q10Y14	10	13	10	13	15	17	10	14	15
Uncharacterized protein OS=Trichodesmium erythraeum (strain IMS101) GN=Tery_3817 PE=4 SV=1	Q10Y13	21	23	14	20	27	24	20	20	25
Uncharacterized protein OS=Trichodesmium erythraeum (strain IMS101) GN=Tery_3823 PE=4 SV=1	Q10Y07	10	14	13	11	14	11	13	13	14
Uncharacterized protein OS=Trichodesmium erythraeum (strain IMS101) GN=Tery_3832 PE=4 SV=1	Q10XZ9	2	4	9	4	6	4	5	5	3
Uncharacterized protein OS=Trichodesmium erythraeum (strain IMS101) GN=Tery_3844 PE=4 SV=1	Q10XY8	0	0	0	0	0	0	0	0	0
Uncharacterized protein OS=Trichodesmium erythraeum (strain IMS101) GN=Tery_3845 PE=4 SV=1	REVERSE_Q10XY7	0	0	0	0	0	0	0	0	0
Uncharacterized protein OS=Trichodesmium erythraeum (strain IMS101) GN=Tery_3865 PE=4 SV=1	Q10XX0	0	0	2	0	0	0	0	0	0
Uncharacterized protein OS=Trichodesmium erythraeum (strain IMS101) GN=Tery_3889 PE=4 SV=1	Q10XU9	2	0	0	0	1	0	1	1	0
Uncharacterized protein OS=Trichodesmium erythraeum (strain IMS101) GN=Tery_3901 PE=4 SV=1	Q10XT8	57	51	52	41	44	45	32	52	44
Uncharacterized protein OS=Trichodesmium erythraeum (strain IMS101) GN=Tery_3913 PE=4 SV=1	Q10XS9	0	0	0	0	3	0	0	0	0
Uncharacterized protein OS=Trichodesmium erythraeum (strain IMS101) GN=Tery_3914 PE=4 SV=1	Q10XS8	5	4	4	0	3	4	0	2	5
Uncharacterized protein OS=Trichodesmium erythraeum (strain IMS101) GN=Tery_3924 PE=4 SV=1	Q10XR8	4	2	0	1	2	2	0	2	2
Uncharacterized protein OS=Trichodesmium erythraeum (strain IMS101) GN=Tery_3948 PE=4 SV=1	Q10XP8	17	13	15	12	13	12	10	17	11
Uncharacterized protein OS=Trichodesmium erythraeum (strain IMS101) GN=Tery_3949 PE=4 SV=1	Q10XP7	15	12	13	10	9	8	7	9	9
Uncharacterized protein OS=Trichodesmium erythraeum (strain IMS101) GN=Tery_3953 PE=4 SV=1	Q10XP4	6	5	7	6	8	6	7	5	6
Uncharacterized protein OS=Trichodesmium erythraeum (strain IMS101) GN=Tery_3966 PE=4 SV=1	Q10XN3	0	0	0	0	0	0	0	0	0
Uncharacterized protein OS=Trichodesmium erythraeum (strain IMS101) GN=Tery_3970 PE=4 SV=1	Q10XM9	27	29	28	30	27	27	26	23	22
Uncharacterized protein OS=Trichodesmium erythraeum (strain IMS101) GN=Tery_3997 PE=4 SV=1	Q10XK4	15	14	13	11	18	15	6	18	14
Uncharacterized protein OS=Trichodesmium erythraeum (strain IMS101) GN=Tery_3998 PE=4 SV=1	Q10XK3	6	3	2	5	4	4	5	5	3
Uncharacterized protein OS=Trichodesmium erythraeum (strain IMS101) GN=Tery_4001 PE=4 SV=1	Q10XK0	0	0	0	0	0	0	0	0	0
Uncharacterized protein OS=Trichodesmium erythraeum (strain IMS101) GN=Tery_4018 PE=4 SV=1	Q10XI8	10	15	17	11	11	10	8	10	8
Uncharacterized protein OS=Trichodesmium erythraeum (strain IMS101) GN=Tery_4020 PE=4 SV=1	Q10XI6	6	5	7	8	6	6	7	8	7
Uncharacterized protein OS=Trichodesmium erythraeum (strain IMS101) GN=Tery_4045 PE=4 SV=1	Q10XG5	34	39	43	45	37	41	25	39	40
Uncharacterized protein OS=Trichodesmium erythraeum (strain IMS101) GN=Tery_4059 PE=4 SV=1	Q10XF3	4	4	3	0	3	3	2	4	3
Uncharacterized protein OS=Trichodesmium erythraeum (strain IMS101) GN=Tery_4062 PE=4 SV=1	Q10XF0	6	5	5	4	7	7	3	4	4
Uncharacterized protein OS=Trichodesmium erythraeum (strain IMS101) GN=Tery_4063 PE=4 SV=1	Q10XE9	11	12	10	12	13	11	10	12	10
Uncharacterized protein OS=Trichodesmium erythraeum (strain IMS101) GN=Tery_4163 PE=4 SV=1	Q10X55	56	63	52	63	67	65	59	63	64
Uncharacterized protein OS=Trichodesmium erythraeum (strain IMS101) GN=Tery_4176 PE=4 SV=1	Q10X42	11	12	13	11	15	10	10	13	13
Uncharacterized protein OS=Trichodesmium erythraeum (strain IMS101) GN=Tery_4245 PE=4 SV=1	REVERSE_Q10WX9	0	0	0	0	0	0	0	0	0
Uncharacterized protein OS=Trichodesmium erythraeum (strain IMS101) GN=Tery_4246 PE=4 SV=1	Q10WX8	0	0	0	0	0	0	0	0	0
Uncharacterized protein OS=Trichodesmium erythraeum (strain IMS101) GN=Tery_4258 PE=4 SV=1	Q10WW8	0	0	0	0	0	0	0	0	0
Uncharacterized protein OS=Trichodesmium erythraeum (strain IMS101) GN=Tery_4285 PE=4 SV=1	Q10WU3	15	17	14	18	23	15	13	19	23
Uncharacterized protein OS=Trichodesmium erythraeum (strain IMS101) GN=Tery_4300 PE=4 SV=1	Q10WS9	0	0	0	0	0	0	0	0	0
Uncharacterized protein OS=Trichodesmium erythraeum (strain IMS101) GN=Tery_4301 PE=4 SV=1	Q10WS8	0	1	1	0	0	0	0	0	0
Uncharacterized protein OS=Trichodesmium erythraeum (strain IMS101) GN=Tery_4308 PE=4 SV=1	REVERSE_Q10WS1	0	0	0	0	0	0	0	0	0
Uncharacterized protein OS=Trichodesmium erythraeum (strain IMS101) GN=Tery_4318 PE=4 SV=1	Q10WR1	4	3	1	3	0	1	0	4	2
Uncharacterized protein OS=Trichodesmium erythraeum (strain IMS101) GN=Tery_4320 PE=4 SV=1	Q10WQ9	1	1	1	0	0	1	0	0	0
Uncharacterized protein OS=Trichodesmium erythraeum (strain IMS101) GN=Tery_4322 PE=4 SV=1	Q10WQ8	2	2	0	2	2	3	0	3	3
Uncharacterized protein OS=Trichodesmium erythraeum (strain IMS101) GN=Tery_4337 PE=4 SV=1	Q10WP5	5	4	5	3	6	5	4	6	5
Uncharacterized protein OS=Trichodesmium erythraeum (strain IMS101) GN=Tery_4353 PE=4 SV=1	Q10WM9	5	5	6	0	4	4	2	4	4
Uncharacterized protein OS=Trichodesmium erythraeum (strain IMS101) GN=Tery_4367 PE=4 SV=1	Q10WL5	0	2	0	0	0	0	2	0	0
Uncharacterized protein OS=Trichodesmium erythraeum (strain IMS101) GN=Tery_4377 PE=4 SV=1	Q10WK6	15	16	13	10	13	12	12	12	13
Uncharacterized protein OS=Trichodesmium erythraeum (strain IMS101) GN=Tery_4384 PE=4 SV=1	Q10WK1	0	0	0	0	0	0	0	0	0
Uncharacterized protein OS=Trichodesmium erythraeum (strain IMS101) GN=Tery_4386 PE=4 SV=1	Q10WJ9	2	2	0	0	0	0	0	0	0
Uncharacterized protein OS=Trichodesmium erythraeum (strain IMS101) GN=Tery_4387 PE=4 SV=1	Q10WJ8	38	33	38	41	36	34	29	39	36
Uncharacterized protein OS=Trichodesmium erythraeum (strain IMS101) GN=Tery_4400 PE=4 SV=1	Q10WI6	5	6	6	10	6	9	8	7	7
Uncharacterized protein OS=Trichodesmium erythraeum (strain IMS101) GN=Tery_4407 PE=4 SV=1	Q10WH9	7	5	5	4	6	6	3	5	4
Uncharacterized protein OS=Trichodesmium erythraeum (strain IMS101) GN=Tery_4419 PE=4 SV=1	Q10WG7	0	1	0	0	1	0	0	0	0
Uncharacterized protein OS=Trichodesmium erythraeum (strain IMS101) GN=Tery_4424 PE=4 SV=1	Q10WG2	0	3	4	0	0	4	0	3	2
Uncharacterized protein OS=Trichodesmium erythraeum (strain IMS101) GN=Tery_4432 PE=4 SV=1	Q10WF5	0	0	0	0	0	0	0	0	0
Uncharacterized protein OS=Trichodesmium erythraeum (strain IMS101) GN=Tery_4433 PE=4 SV=1	Q10WF4	4	4	3	2	2	0	1	2	3
Uncharacterized protein OS=Trichodesmium erythraeum (strain IMS101) GN=Tery_4435 PE=4 SV=1	Q10WF2	5	5	6	3	3	2	2	2	6
Uncharacterized protein OS=Trichodesmium erythraeum (strain IMS101) GN=Tery_4457 PE=4 SV=1	Q10WD0	0	0	1	1	0	0	0	0	0
Uncharacterized protein OS=Trichodesmium erythraeum (strain IMS101) GN=Tery_4459 PE=4 SV=1	Q10WC8	1	0	3	0	0	0	0	0	0
Uncharacterized protein OS=Trichodesmium erythraeum (strain IMS101) GN=Tery_4464 PE=4 SV=1	Q10WC3	3	0	1	0	1	1	3	2	0
Uncharacterized protein OS=Trichodesmium erythraeum (strain IMS101) GN=Tery_4500 PE=4 SV=1	Q10W88	0	0	0	0	0	0	0	0	0
Uncharacterized protein OS=Trichodesmium erythraeum (strain IMS101) GN=Tery_4516 PE=4 SV=1	Q10W73	0	1	0	0	1	1	0	0	0
Uncharacterized protein OS=Trichodesmium erythraeum (strain IMS101) GN=Tery_4569 PE=4 SV=1	Q10W29	3	3	3	2	2	3	3	2	2
Uncharacterized protein OS=Trichodesmium erythraeum (strain IMS101) GN=Tery_4571 PE=4 SV=1	Q10W27	1	5	0	0	7	6	8	4	7
Uncharacterized protein OS=Trichodesmium erythraeum (strain IMS101) GN=Tery_4584 PE=4 SV=1	Q10W14	6	10	9	5	7	4	4	6	7
Uncharacterized protein OS=Trichodesmium erythraeum (strain IMS101) GN=Tery_4586 PE=4 SV=1	Q10W12	0	2	0	0	3	0	0	3	0
Uncharacterized protein OS=Trichodesmium erythraeum (strain IMS101) GN=Tery_4590 PE=4 SV=1	Q10W08	25	25	30	22	24	25	18	20	19
Uncharacterized protein OS=Trichodesmium erythraeum (strain IMS101) GN=Tery_4593 PE=4 SV=1	Q10W05	151	152	142	153	133	145	146	162	148
Uncharacterized protein OS=Trichodesmium erythraeum (strain IMS101) GN=Tery_4620 PE=4 SV=1	Q10VY1	0	0	0	0	0	0	0	0	0
Uncharacterized protein OS=Trichodesmium erythraeum (strain IMS101) GN=Tery_4623 PE=4 SV=1	Q10VX9	1	2	1	3	2	3	0	3	1
Uncharacterized protein OS=Trichodesmium erythraeum (strain IMS101) GN=Tery_4628 PE=4 SV=1	Q10VX4	0	0	1	0	0	0	0	0	0
Uncharacterized protein OS=Trichodesmium erythraeum (strain IMS101) GN=Tery_4657 PE=4 SV=1	Q10VU8	10	10	8	8	9	7	7	9	7
Uncharacterized protein OS=Trichodesmium erythraeum (strain IMS101) GN=Tery_4670 PE=4 SV=1	Q10VT6	5	0	0	5	0	3	5	5	3
Uncharacterized protein OS=Trichodesmium erythraeum (strain IMS101) GN=Tery_4676 PE=4 SV=1	Q10VT2	3	2	2	2	3	1	0	2	2
Uncharacterized protein OS=Trichodesmium erythraeum (strain IMS101) GN=Tery_4687 PE=4 SV=1	Q10VS3	2	1	0	0	2	0	0	0	0
Uncharacterized protein OS=Trichodesmium erythraeum (strain IMS101) GN=Tery_4706 PE=4 SV=1	Q10VQ5	3	3	2	4	2	1	0	3	4
Uncharacterized protein OS=Trichodesmium erythraeum (strain IMS101) GN=Tery_4714 PE=4 SV=1	Q10VP7	0	0	0	0	0	0	0	0	0
Uncharacterized protein OS=Trichodesmium erythraeum (strain IMS101) GN=Tery_4728 PE=4 SV=1	Q10VN5	1	2	1	1	0	2	0	1	2
Uncharacterized protein OS=Trichodesmium erythraeum (strain IMS101) GN=Tery_4757 PE=4 SV=1	Q10VL3	2	0	0	0	1	2	0	0	2
Uncharacterized protein OS=Trichodesmium erythraeum (strain IMS101) GN=Tery_4773 PE=4 SV=1	Q10VJ8	40	42	43	36	38	38	26	39	37
Uncharacterized protein OS=Trichodesmium erythraeum (strain IMS101) GN=Tery_4783 PE=4 SV=1	Q10VI9	0	0	0	0	0	0	0	0	0
Uncharacterized protein OS=Trichodesmium erythraeum (strain IMS101) GN=Tery_4789 PE=4 SV=1	Q10VI4	8	12	11	11	11	12	10	15	8
Uncharacterized protein OS=Trichodesmium erythraeum (strain IMS101) GN=Tery_4794 PE=4 SV=1	Q10VH9	0	1	0	1	0	1	0	1	0
Uncharacterized protein OS=Trichodesmium erythraeum (strain IMS101) GN=Tery_4813 PE=4 SV=1	Q10VG4	0	0	0	0	0	0	0	0	0
Uncharacterized protein OS=Trichodesmium erythraeum (strain IMS101) GN=Tery_4870 PE=4 SV=1	REVERSE_Q10VC1	0	0	0	0	0	0	0	0	0
Uncharacterized protein OS=Trichodesmium erythraeum (strain IMS101) GN=Tery_4878 PE=4 SV=1	Q10VB6	2	0	0	0	0	0	0	0	0
Uncharacterized protein OS=Trichodesmium erythraeum (strain IMS101) GN=Tery_4894 PE=4 SV=1	Q10VA5	31	31	30	26	32	30	24	33	29
Uncharacterized protein OS=Trichodesmium erythraeum (strain IMS101) GN=Tery_4902 PE=4 SV=1	Q10V98	0	0	0	0	0	0	0	0	0
Uncharacterized protein OS=Trichodesmium erythraeum (strain IMS101) GN=Tery_4903 PE=3 SV=1	Q10V97	0	0	0	1	2	0	1	1	1
Uncharacterized protein OS=Trichodesmium erythraeum (strain IMS101) GN=Tery_4916 PE=4 SV=1	Q10V87	0	0	0	2	0	0	0	0	0
Uncharacterized protein OS=Trichodesmium erythraeum (strain IMS101) GN=Tery_4935 PE=4 SV=1	Q10V74	7	7	0	8	8	7	10	8	8
Uncharacterized protein OS=Trichodesmium erythraeum (strain IMS101) GN=Tery_4957 PE=4 SV=1	Q10V53	56	55	58	58	56	56	53	60	52
Uncharacterized protein OS=Trichodesmium erythraeum (strain IMS101) GN=Tery_4960 PE=4 SV=1	Q10V50	0	3	3	5	3	5	2	5	2
Uncharacterized protein OS=Trichodesmium erythraeum (strain IMS101) GN=Tery_4975 PE=4 SV=1	Q10V35	1	2	3	0	2	2	0	2	0
Uncharacterized protein OS=Trichodesmium erythraeum (strain IMS101) GN=Tery_4984 PE=4 SV=1	Q10V26	0	0	0	0	0	0	0	1	0
Uncharacterized protein OS=Trichodesmium erythraeum (strain IMS101) GN=Tery_4988 PE=4 SV=1	REVERSE_Q10V22	0	0	0	0	0	0	0	0	0
Uncharacterized protein OS=Trichodesmium erythraeum (strain IMS101) GN=Tery_5011 PE=4 SV=1	Q10V01	63	55	57	45	61	58	52	69	62
Uncharacterized protein OS=Trichodesmium erythraeum (strain IMS101) GN=Tery_5018 PE=4 SV=1	Q10UZ4	82	86	84	86	90	86	78	96	84
Uncharacterized protein OS=Trichodesmium erythraeum (strain IMS101) GN=Tery_5020 PE=4 SV=1	Q10UZ2	41	42	47	52	48	52	43	50	44
Uncharacterized protein OS=Trichodesmium erythraeum (strain IMS101) GN=Tery_5025 PE=4 SV=1	Q10UY7	2	0	2	0	3	0	0	0	0
Uncharacterized protein OS=Trichodesmium erythraeum (strain IMS101) GN=Tery_5026 PE=4 SV=1	Q10UY6	2	2	0	0	4	3	0	3	2
UPF0061 protein Tery_1476 OS=Trichodesmium erythraeum (strain IMS101) GN=Tery_1476 PE=3 SV=1	Q115Q9	4	3	3	2	5	1	3	4	2
UPF0145 protein Tery_3795 OS=Trichodesmium erythraeum (strain IMS101) GN=Tery_3795 PE=3 SV=1	Q10Y33	5	5	8	8	8	10	4	7	8
UPF0234 protein Tery_2743 OS=Trichodesmium erythraeum (strain IMS101) GN=Tery_2743 PE=3 SV=1	Q110Z7	18	19	15	19	24	19	16	24	18
UPF0296 protein Tery_2835 OS=Trichodesmium erythraeum (strain IMS101) GN=Tery_2835 PE=3 SV=1	Q110R5	0	2	0	2	0	0	1	2	0
UPF0367 protein Tery_1229 OS=Trichodesmium erythraeum (strain IMS101) GN=Tery_1229 PE=3 SV=1	Q116J4	29	30	30	29	29	32	29	30	29
Urease accessory protein UreG OS=Trichodesmium erythraeum (strain IMS101) GN=ureG PE=3 SV=1	Q117Z7	0	0	0	0	0	0	0	0	0
Urease subunit alpha OS=Trichodesmium erythraeum (strain IMS101) GN=ureC PE=3 SV=1	Q117Z3	2	3	2	3	4	4	1	5	0
Urease subunit beta OS=Trichodesmium erythraeum (strain IMS101) GN=ureB PE=3 SV=1	Q117Z8	0	0	0	1	0	0	0	0	0
Urease subunit gamma OS=Trichodesmium erythraeum (strain IMS101) GN=ureA PE=3 SV=1	Q117Z9	1	2	2	2	2	3	2	3	0
Uroporphyrinogen decarboxylase OS=Trichodesmium erythraeum (strain IMS101) GN=hemE PE=3 SV=1	Q114U6	0	0	0	0	0	2	0	1	0
Uroporphyrinogen-III synthase / uroporphyrinogen-III C-methyltransferase OS=Trichodesmium erythraeum (strain IMS101) GN=Tery_3325 PE=3 SV=1	Q10Z96	0	0	0	0	0	0	0	0	0
UspA OS=Trichodesmium erythraeum (strain IMS101) GN=Tery_3375 PE=3 SV=1	Q10Z47	9	6	5	9	9	8	3	7	10
Valine--tRNA ligase OS=Trichodesmium erythraeum (strain IMS101) GN=valS PE=3 SV=1	Q10YZ0	12	14	7	16	15	13	5	14	14
Vesicle-fusing ATPase OS=Trichodesmium erythraeum (strain IMS101) GN=Tery_2337 PE=3 SV=1	Q112L7	46	43	46	45	52	36	45	50	50
Vitamin K epoxide reductase OS=Trichodesmium erythraeum (strain IMS101) GN=Tery_0104 PE=4 SV=1	Q11A69	2	2	3	0	4	0	0	2	0
von Willebrand factor, type A OS=Trichodesmium erythraeum (strain IMS101) GN=Tery_1244 PE=4 SV=1	Q116I2	6	5	6	7	10	6	4	7	9
von Willebrand factor, type A OS=Trichodesmium erythraeum (strain IMS101) GN=Tery_2368 PE=4 SV=1	Q112I6	5	4	5	4	6	4	4	4	3
von Willebrand factor, type A OS=Trichodesmium erythraeum (strain IMS101) GN=Tery_3147 PE=4 SV=1	Q10ZP7	0	0	0	0	2	0	0	0	0
WD-40 repeat OS=Trichodesmium erythraeum (strain IMS101) GN=Tery_3206 PE=4 SV=1	Q10ZJ8	4	4	9	6	8	2	4	4	2
WD-40 repeat OS=Trichodesmium erythraeum (strain IMS101) GN=Tery_3771 PE=4 SV=1	REVERSE_Q10Y55	0	0	0	0	0	0	0	0	0
WD-40 repeat OS=Trichodesmium erythraeum (strain IMS101) GN=Tery_3869 PE=4 SV=1	Q10XW6	3	3	0	4	4	3	2	7	2
WD-40 repeat OS=Trichodesmium erythraeum (strain IMS101) GN=Tery_3923 PE=4 SV=1	Q10XR9	0	0	0	0	0	0	0	0	0
WD-40 repeat OS=Trichodesmium erythraeum (strain IMS101) GN=Tery_3932 PE=4 SV=1	Q10XR1	1	2	2	0	1	0	0	0	0
WD-40 repeat OS=Trichodesmium erythraeum (strain IMS101) GN=Tery_3934 PE=4 SV=1	Q10XQ9	0	0	0	0	0	0	0	0	0
Xaa-Pro dipeptidase OS=Trichodesmium erythraeum (strain IMS101) GN=Tery_3411 PE=3 SV=1	Q10Z13	0	0	0	0	0	0	0	0	0
Ycf48-like protein OS=Trichodesmium erythraeum (strain IMS101) GN=Tery_3503 PE=3 SV=1	Q10YT1	14	11	12	15	12	14	17	16	11
YD repeat protein OS=Trichodesmium erythraeum (strain IMS101) GN=Tery_3459 PE=4 SV=1	Q10YX3	0	0	0	0	0	0	0	0	0
Zeta-carotene desaturase OS=Trichodesmium erythraeum (strain IMS101) GN=Tery_3954 PE=3 SV=1	Q10XP3	4	6	2	4	5	5	7	7	5

## Sheet: Proteome t=4
Annotation	Uniprot ID	-P4A	-P4B	-P4C	RF4A	RF4B	RF4C
Uncharacterized protein OS=Trichodesmium erythraeum (strain IMS101) GN=Tery_4236 PE=4 SV=1	Q10WY8	7	0	5	0	0	0
GUN4-like OS=Trichodesmium erythraeum (strain IMS101) GN=Tery_3036 PE=4 SV=1	Q10ZY7	3	3	0	0	0	0
Heme oxygenase (Decyclizing) OS=Trichodesmium erythraeum (strain IMS101) GN=Tery_0335 PE=4 SV=1	Q119L5	20	22	20	11	8	13
HesA OS=Trichodesmium erythraeum (strain IMS101) GN=hesA PE=4 SV=1	Q9KJL3	10	7	7	0	4	7
Keratin, type I cytoskeletal 10 OS=Homo sapiens GN=KRT10 PE=1 SV=6	P13645	32	31	43	9	11	33
Keratin, type II cytoskeletal 1 OS=Homo sapiens GN=KRT1 PE=1 SV=6	P04264	26	34	35	13	10	37
L-threonine synthase OS=Trichodesmium erythraeum (strain IMS101) GN=Tery_4348 PE=4 SV=1	Q10WN4	4	3	5	0	0	0
NAD(P)H-quinone oxidoreductase subunit 2 OS=Trichodesmium erythraeum (strain IMS101) GN=ndhB PE=3 SV=1	Q111U1	4	4	4	0	0	0
Nitrogen-fixing NifU-like OS=Trichodesmium erythraeum (strain IMS101) GN=Tery_3402 PE=4 SV=1	Q10Z21	16	0	17	16	0	0
Phosphate import ATP-binding protein PstB OS=Trichodesmium erythraeum (strain IMS101) GN=pstB PE=3 SV=1	Q10YP7	14	14	17	7	6	10
Protease 4 OS=Trichodesmium erythraeum (strain IMS101) GN=Tery_1590 PE=3 SV=1	Q115F5	2	0	3	0	0	0
Threonine--tRNA ligase OS=Trichodesmium erythraeum (strain IMS101) GN=thrS PE=3 SV=1	Q115S7	9	8	10	4	4	5
Uncharacterized protein OS=Trichodesmium erythraeum (strain IMS101) GN=Tery_0229 PE=4 SV=1	Q119V7	4	4	4	2	0	0
Uncharacterized protein OS=Trichodesmium erythraeum (strain IMS101) GN=Tery_0764 PE=4 SV=1	Q117Y3	4	5	4	4	0	0
Uncharacterized protein OS=Trichodesmium erythraeum (strain IMS101) GN=Tery_0869 PE=4 SV=1	Q117Q0	1	3	6	0	0	1
Uncharacterized protein OS=Trichodesmium erythraeum (strain IMS101) GN=Tery_2525 PE=4 SV=1	Q111U4	8	8	8	3	4	8
Uncharacterized protein OS=Trichodesmium erythraeum (strain IMS101) GN=Tery_2737 PE=4 SV=1	Q111A3	3	2	3	0	0	0
Uncharacterized protein OS=Trichodesmium erythraeum (strain IMS101) GN=Tery_4935 PE=4 SV=1	Q10V74	10	8	9	0	5	7
Uncharacterized protein OS=Trichodesmium erythraeum (strain IMS101) GN=Tery_5025 PE=4 SV=1	Q10UY7	5	0	4	0	0	0
Na-Ca exchanger/integrin-beta4 OS=Trichodesmium erythraeum (strain IMS101) GN=Tery_0601 PE=4 SV=1	Q118M9	0	9	0	9	0	12
Ribulose-1,5-bisphosphate carboxylase/oxygenase large subunit (Fragment) OS=Trichodesmium erythraeum (strain IMS101) GN=rbcL PE=3 SV=1	Q2ACI4	0	0	0	375	0	0
3-mercaptopyruvate sulfurtransferase OS=Trichodesmium erythraeum (strain IMS101) GN=Tery_0556 PE=4 SV=1	Q118S0	0	0	0	1	2	3
30S ribosomal protein S12 OS=Trichodesmium erythraeum (strain IMS101) GN=rpsL PE=3 SV=1	Q118Z5	0	0	6	9	6	7
Ferredoxin thioredoxin reductase, alpha chain OS=Trichodesmium erythraeum (strain IMS101) GN=Tery_1949 PE=4 SV=1	Q113X2	0	0	0	3	0	3
Ferrochelatase OS=Trichodesmium erythraeum (strain IMS101) GN=hemH PE=3 SV=1	Q10WR6	0	0	0	2	0	4
Glucose-6-phosphate isomerase OS=Trichodesmium erythraeum (strain IMS101) GN=pgi PE=3 SV=1	Q10XI2	118	118	126	146	99	127
Glutamate synthase (Ferredoxin) OS=Trichodesmium erythraeum (strain IMS101) GN=Tery_0466 PE=4 SV=1	REVERSE_Q119A1	0	0	0	2	0	1
Glutaredoxin 3 OS=Trichodesmium erythraeum (strain IMS101) GN=Tery_4207 PE=4 SV=1	Q10X15	4	0	0	0	5	7
PBS lyase HEAT-like repeat OS=Trichodesmium erythraeum (strain IMS101) GN=Tery_0978 PE=4 SV=1	Q117G5	0	0	0	1	0	3
Peptidase M50 OS=Trichodesmium erythraeum (strain IMS101) GN=Tery_3191 PE=4 SV=1	Q10ZK9	0	0	0	0	5	0
Phycobilisome protein OS=Trichodesmium erythraeum (strain IMS101) GN=Tery_0996 PE=3 SV=1	Q117F0	178	218	219	209	198	218
Plasmid stabilization system OS=Trichodesmium erythraeum (strain IMS101) GN=Tery_1455 PE=4 SV=1	Q115S9	0	0	0	0	2	5
Precorrin-6Y C5,15-methyltransferase (Decarboxylating), CbiT subunit OS=Trichodesmium erythraeum (strain IMS101) GN=Tery_1288 PE=4 SV=1	Q116F5	0	0	0	1	1	2
Protein translocase subunit SecY OS=Trichodesmium erythraeum (strain IMS101) GN=secY PE=3 SV=1	Q110C5	0	0	0	4	0	0
SSS sodium solute transporter superfamily OS=Trichodesmium erythraeum (strain IMS101) GN=Tery_3406 PE=3 SV=1	Q10Z17	0	2	0	3	2	6
Stress protein OS=Trichodesmium erythraeum (strain IMS101) GN=Tery_5063 PE=4 SV=1	Q10UV7	0	0	0	0	0	4
Uncharacterized protein OS=Trichodesmium erythraeum (strain IMS101) GN=Tery_0501 PE=4 SV=1	Q118W8	0	0	0	3	1	0
Uncharacterized protein OS=Trichodesmium erythraeum (strain IMS101) GN=Tery_1169 PE=4 SV=1	Q116P4	0	0	3	2	4	3
Uncharacterized protein OS=Trichodesmium erythraeum (strain IMS101) GN=Tery_2162 PE=4 SV=1	Q113C9	0	0	0	3	0	3
Uncharacterized protein OS=Trichodesmium erythraeum (strain IMS101) GN=Tery_2237 PE=4 SV=1	Q112V8	1	0	0	0	3	2
Uncharacterized protein OS=Trichodesmium erythraeum (strain IMS101) GN=Tery_2254 PE=4 SV=1	Q112U1	0	3	0	3	3	3
Uncharacterized protein OS=Trichodesmium erythraeum (strain IMS101) GN=Tery_3366 PE=4 SV=1	Q10Z56	0	0	9	0	5	13
Uncharacterized protein OS=Trichodesmium erythraeum (strain IMS101) GN=Tery_3572 PE=4 SV=1	Q10YL8	11	9	12	16	13	14
Uncharacterized protein OS=Trichodesmium erythraeum (strain IMS101) GN=Tery_3998 PE=4 SV=1	Q10XK3	0	0	4	4	3	4
Aminotransferase, class V OS=Trichodesmium erythraeum (strain IMS101) GN=Tery_4134 PE=3 SV=1	Q10X82	10	9	13	11	7	10
Gas vesicle protein GvpN OS=Trichodesmium erythraeum (strain IMS101) GN=Tery_2329 PE=4 SV=1	Q112M3	4	4	5	2	2	6
Gas vesicle structural protein OS=Trichodesmium erythraeum (strain IMS101) GN=gvpA PE=3 SV=1	Q112M7	0	5	0	0	0	6
Glutamine synthetase OS=Trichodesmium erythraeum (strain IMS101) GN=Tery_3834 PE=3 SV=1	Q10XZ7	168	186	196	179	124	182
Hemolysin-type calcium-binding region OS=Trichodesmium erythraeum (strain IMS101) GN=Tery_0419 PE=4 SV=1	Q119E3	75	74	72	73	53	67
Hemolysin-type calcium-binding region OS=Trichodesmium erythraeum (strain IMS101) GN=Tery_0424 PE=4 SV=1	Q119E0	35	29	37	38	26	32
Keratin, type I cuticular Ha8 OS=Homo sapiens GN=KRT38 PE=2 SV=3	O76015	4	2	0	2	0	6
Na-Ca exchanger/integrin-beta4 OS=Trichodesmium erythraeum (strain IMS101) GN=Tery_0657 PE=4 SV=1	Q118H8	12	11	8	7	4	7
Na-Ca exchanger/integrin-beta4 OS=Trichodesmium erythraeum (strain IMS101) GN=Tery_4497 PE=4 SV=1	Q10W91	11	7	11	8	7	10
Na-Ca exchanger/integrin-beta4 OS=Trichodesmium erythraeum (strain IMS101) GN=Tery_4498 PE=4 SV=1	Q10W90	12	9	11	10	6	11
NifS OS=Trichodesmium erythraeum (strain IMS101) GN=nifS PE=3 SV=1	Q9KJL9	9	0	11	9	6	9
Nitrogenase cofactor biosynthesis protein NifB OS=Trichodesmium erythraeum (strain IMS101) GN=Tery_4133 PE=4 SV=1	Q10X83	20	16	15	16	9	13
Peptidase-like OS=Trichodesmium erythraeum (strain IMS101) GN=Tery_1891 PE=4 SV=1	Q114C7	280	290	293	276	199	261
Peptidase-like OS=Trichodesmium erythraeum (strain IMS101) GN=Tery_1974 PE=4 SV=1	Q113U9	177	192	184	168	133	166
Photosystem II protein D1 1 OS=Trichodesmium erythraeum (strain IMS101) GN=psbA1 PE=3 SV=1	Q11A00	26	20	28	21	17	29
Photosystem II protein D1 2 OS=Trichodesmium erythraeum (strain IMS101) GN=psbA3 PE=3 SV=1	Q10VK7	0	0	22	0	0	25
Phycobilisome linker polypeptide OS=Trichodesmium erythraeum (strain IMS101) GN=Tery_2209 PE=3 SV=1	Q112Y6	175	154	174	165	109	179
Phycobilisome linker polypeptide OS=Trichodesmium erythraeum (strain IMS101) GN=Tery_2210 PE=3 SV=1	Q112Y5	139	123	135	127	84	141
Phycobilisome protein OS=Trichodesmium erythraeum (strain IMS101) GN=Tery_0997 PE=3 SV=1	Q117E9	131	119	132	136	72	133
Phycobilisome protein OS=Trichodesmium erythraeum (strain IMS101) GN=Tery_0998 PE=3 SV=1	Q117E8	298	282	298	328	209	301
Putative signal transduction protein with Nacht domain OS=Trichodesmium erythraeum (strain IMS101) GN=Tery_2496 PE=4 SV=1	Q111X1	2	6	7	0	2	9
Putative signal transduction protein with Nacht domain OS=Trichodesmium erythraeum (strain IMS101) GN=Tery_2498 PE=4 SV=1	Q111W9	2	5	7	0	2	8
Ribulose bisphosphate carboxylase large chain OS=Trichodesmium erythraeum (strain IMS101) GN=cbbL PE=3 SV=1	Q10WH6	458	451	497	495	298	408
RNA-binding region RNP-1 OS=Trichodesmium erythraeum (strain IMS101) GN=Tery_4005 PE=4 SV=1	Q10XJ6	55	57	52	51	41	51
Transcriptional regulator, Crp/Fnr family OS=Trichodesmium erythraeum (strain IMS101) GN=Tery_2023 PE=4 SV=1	Q113Q4	16	15	20	12	12	16
Uncharacterized protein OS=Trichodesmium erythraeum (strain IMS101) GN=Tery_1090 PE=4 SV=1	Q116W8	48	46	43	42	32	48
Uncharacterized protein OS=Trichodesmium erythraeum (strain IMS101) GN=Tery_3117 PE=4 SV=1	Q10ZS4	8	5	5	4	4	5
1-(5-phosphoribosyl)-5-[(5-phosphoribosylamino)methylideneamino] imidazole-4-carboxamide isomerase OS=Trichodesmium erythraeum (strain IMS101) GN=hisA PE=3 SV=1	Q10Y87	13	11	13	11	8	13
1-acyl-sn-glycerol-3-phosphate acyltransferase OS=Trichodesmium erythraeum (strain IMS101) GN=Tery_1819 PE=3 SV=1	Q114J8	0	2	1	0	0	1
1-Cys peroxiredoxin OS=Trichodesmium erythraeum (strain IMS101) GN=Tery_5038 PE=4 SV=1	Q10UX6	83	97	89	88	66	90
1-deoxy-D-xylulose 5-phosphate reductoisomerase OS=Trichodesmium erythraeum (strain IMS101) GN=dxr PE=3 SV=1	Q119E5	0	3	0	0	0	1
1-deoxy-D-xylulose-5-phosphate synthase OS=Trichodesmium erythraeum (strain IMS101) GN=dxs PE=3 SV=1	Q10ZY2	2	1	2	2	0	0
1,4-alpha-glucan branching enzyme GlgB OS=Trichodesmium erythraeum (strain IMS101) GN=glgB PE=3 SV=1	Q114I1	25	28	28	26	19	28
1,4-dihydroxy-2-naphthoyl-CoA synthase OS=Trichodesmium erythraeum (strain IMS101) GN=menB PE=3 SV=1	Q10XC8	2	2	3	0	0	2
10 kDa chaperonin OS=Trichodesmium erythraeum (strain IMS101) GN=groS PE=3 SV=1	Q10WQ5	105	106	97	110	60	89
2-amino-4-hydroxy-6-hydroxymethyldihydropteridine pyrophosphokinase OS=Trichodesmium erythraeum (strain IMS101) GN=Tery_0688 PE=4 SV=1	Q118E9	3	5	4	3	4	5
2-C-methyl-D-erythritol 4-phosphate cytidylyltransferase OS=Trichodesmium erythraeum (strain IMS101) GN=ispD PE=3 SV=1	Q118M1	9	8	9	9	6	8
2-isopropylmalate synthase OS=Trichodesmium erythraeum (strain IMS101) GN=leuA PE=3 SV=1	Q112U2	5	4	5	5	1	1
2-isopropylmalate synthase OS=Trichodesmium erythraeum (strain IMS101) GN=Tery_0286 PE=3 SV=1	Q119Q8	0	0	0	1	0	0
2-succinyl-5-enolpyruvyl-6-hydroxy-3-cyclohexene-1-carboxylate synthase OS=Trichodesmium erythraeum (strain IMS101) GN=menD PE=3 SV=1	Q10XD8	0	0	0	0	0	0
2,3-bisphosphoglycerate-independent phosphoglycerate mutase OS=Trichodesmium erythraeum (strain IMS101) GN=gpmI PE=3 SV=1	Q117D6	2	3	2	2	3	3
2,3-dimethylmalate lyase OS=Trichodesmium erythraeum (strain IMS101) GN=Tery_4268 PE=4 SV=1	Q10WV9	3	3	3	2	4	3
2OG-Fe(II) oxygenase OS=Trichodesmium erythraeum (strain IMS101) GN=Tery_3466 PE=4 SV=1	Q10YW7	1	2	2	0	0	1
3-dehydroquinate synthase OS=Trichodesmium erythraeum (strain IMS101) GN=aroB PE=3 SV=1	Q10V03	0	3	4	4	2	3
3-dehydroquinate synthase OS=Trichodesmium erythraeum (strain IMS101) GN=Tery_2977 PE=4 SV=1	Q110D9	5	3	2	2	3	5
3-deoxy-D-arabinoheptulosonate-7-phosphate synthase OS=Trichodesmium erythraeum (strain IMS101) GN=Tery_0171 PE=4 SV=1	Q11A11	11	7	6	8	8	9
3-deoxy-D-arabinoheptulosonate-7-phosphate synthase OS=Trichodesmium erythraeum (strain IMS101) GN=Tery_4537 PE=4 SV=1	Q10W57	0	0	0	0	0	0
3-hydroxyacyl-[acyl-carrier-protein] dehydratase FabZ OS=Trichodesmium erythraeum (strain IMS101) GN=fabZ PE=3 SV=1	Q10ZA2	10	11	10	7	8	15
3-isopropylmalate dehydratase, small subunit OS=Trichodesmium erythraeum (strain IMS101) GN=Tery_1041 PE=3 SV=1	Q117B1	2	4	5	3	3	3
3-isopropylmalate dehydrogenase OS=Trichodesmium erythraeum (strain IMS101) GN=leuB PE=3 SV=1	Q10WI3	64	65	65	58	52	67
3-methyl-2-oxobutanoate hydroxymethyltransferase OS=Trichodesmium erythraeum (strain IMS101) GN=panB PE=3 SV=1	Q10WG3	1	0	1	1	0	0
3-oxoacyl-[acyl-carrier-protein] reductase OS=Trichodesmium erythraeum (strain IMS101) GN=Tery_3438 PE=4 SV=1	Q10YZ3	45	44	41	41	32	50
3-oxoacyl-[acyl-carrier-protein] synthase 2 OS=Trichodesmium erythraeum (strain IMS101) GN=Tery_0451 PE=3 SV=1	Q119B4	26	25	27	26	15	21
3-phosphoshikimate 1-carboxyvinyltransferase OS=Trichodesmium erythraeum (strain IMS101) GN=aroA PE=3 SV=1	Q10VA4	8	9	9	10	4	12
3'-5' exonuclease OS=Trichodesmium erythraeum (strain IMS101) GN=Tery_1621 PE=4 SV=1	Q115C4	3	5	7	5	4	5
3'-nucleotidase / exopolyphosphatase / 5'-nucleotidase OS=Trichodesmium erythraeum (strain IMS101) GN=Tery_2384 PE=4 SV=1	Q112H0	7	9	9	7	5	9
3'(2'),5'-bisphosphate nucleotidase OS=Trichodesmium erythraeum (strain IMS101) GN=Tery_1792 PE=4 SV=1	Q114M3	20	21	21	20	15	24
30S ribosomal protein S10 OS=Trichodesmium erythraeum (strain IMS101) GN=rpsJ PE=3 SV=1	Q118Z1	21	21	23	21	9	21
30S ribosomal protein S11 OS=Trichodesmium erythraeum (strain IMS101) GN=rpsK PE=3 SV=1	Q110D0	13	14	15	12	7	15
30S ribosomal protein S13 OS=Trichodesmium erythraeum (strain IMS101) GN=rpsM PE=3 SV=1	Q110C9	34	30	38	31	15	36
30S ribosomal protein S14 OS=Trichodesmium erythraeum (strain IMS101) GN=rpsN PE=3 SV=1	Q10ZE2	15	16	16	11	6	15
30S ribosomal protein S15 OS=Trichodesmium erythraeum (strain IMS101) GN=rpsO PE=3 SV=1	Q11A13	6	5	6	7	3	4
30S ribosomal protein S16 OS=Trichodesmium erythraeum (strain IMS101) GN=rpsP PE=3 SV=1	Q111T6	38	42	41	39	26	41
30S ribosomal protein S17 OS=Trichodesmium erythraeum (strain IMS101) GN=rpsQ PE=3 SV=1	Q110B6	23	28	26	23	18	31
30S ribosomal protein S18 OS=Trichodesmium erythraeum (strain IMS101) GN=rpsR PE=3 SV=1	Q10Y89	16	16	14	12	13	14
30S ribosomal protein S19 OS=Trichodesmium erythraeum (strain IMS101) GN=rpsS PE=3 SV=1	Q110B1	2	7	3	2	1	4
30S ribosomal protein S2 OS=Trichodesmium erythraeum (strain IMS101) GN=rpsB PE=3 SV=1	Q116Q2	44	42	40	25	23	45
30S ribosomal protein S20 OS=Trichodesmium erythraeum (strain IMS101) GN=rpsT PE=3 SV=1	Q110G9	16	10	12	10	8	16
30S ribosomal protein S21 OS=Trichodesmium erythraeum (strain IMS101) GN=rpsU PE=3 SV=1	Q10VZ7	13	14	12	10	8	15
30S ribosomal protein S3 OS=Trichodesmium erythraeum (strain IMS101) GN=rpsC PE=3 SV=1	Q110B3	60	47	58	53	30	54
30S ribosomal protein S4 OS=Trichodesmium erythraeum (strain IMS101) GN=rpsD PE=3 SV=1	Q119M5	39	40	44	40	25	41
30S ribosomal protein S5 OS=Trichodesmium erythraeum (strain IMS101) GN=rpsE PE=3 SV=1	Q110C3	33	36	39	33	24	35
30S ribosomal protein S6 OS=Trichodesmium erythraeum (strain IMS101) GN=rpsF PE=3 SV=1	Q10XV0	27	21	29	27	19	20
30S ribosomal protein S7 OS=Trichodesmium erythraeum (strain IMS101) GN=rpsG PE=3 SV=1	Q118Z4	60	59	64	60	42	62
30S ribosomal protein S8 OS=Trichodesmium erythraeum (strain IMS101) GN=rpsH PE=3 SV=1	Q110C0	30	22	27	30	18	20
30S ribosomal protein S9 OS=Trichodesmium erythraeum (strain IMS101) GN=rpsI PE=3 SV=1	Q110D5	24	25	23	31	21	26
33 kDa chaperonin OS=Trichodesmium erythraeum (strain IMS101) GN=hslO PE=3 SV=1	Q112R6	3	2	2	0	4	3
4-alpha-glucanotransferase OS=Trichodesmium erythraeum (strain IMS101) GN=Tery_1296 PE=3 SV=1	Q116E8	29	27	27	23	16	27
4-diphosphocytidyl-2-C-methyl-D-erythritol kinase OS=Trichodesmium erythraeum (strain IMS101) GN=ispE PE=3 SV=1	Q10VR1	0	0	0	2	0	0
4-hydroxy-3-methylbut-2-en-1-yl diphosphate synthase (ferredoxin) OS=Trichodesmium erythraeum (strain IMS101) GN=ispG PE=3 SV=1	Q10W70	0	0	0	0	0	1
4-hydroxy-3-methylbut-2-enyl diphosphate reductase OS=Trichodesmium erythraeum (strain IMS101) GN=ispH PE=3 SV=1	Q10WA8	0	0	0	0	0	0
4-hydroxy-tetrahydrodipicolinate reductase OS=Trichodesmium erythraeum (strain IMS101) GN=dapB PE=3 SV=1	Q10YI1	19	22	20	17	19	23
4-hydroxy-tetrahydrodipicolinate synthase OS=Trichodesmium erythraeum (strain IMS101) GN=dapA PE=3 SV=1	Q118P2	31	30	33	32	23	34
4-hydroxybenzoyl-CoA thioesterase OS=Trichodesmium erythraeum (strain IMS101) GN=Tery_4502 PE=4 SV=1	Q10W86	10	11	7	6	6	9
5-methyltetrahydropteroyltriglutamate--homocysteine methyltransferase OS=Trichodesmium erythraeum (strain IMS101) GN=metE PE=3 SV=1	Q117R7	11	7	11	8	7	17
5-methyltetrahydropteroyltriglutamate--homocysteine methyltransferase OS=Trichodesmium erythraeum (strain IMS101) GN=metE PE=3 SV=1	REVERSE_Q117R7	0	0	0	0	0	0
5-oxoprolinase (ATP-hydrolyzing) OS=Trichodesmium erythraeum (strain IMS101) GN=Tery_1019 PE=4 SV=1	Q117C9	0	0	0	0	0	0
5'-nucleotidase / 3'-nucleotidase / exopolyphosphatase OS=Trichodesmium erythraeum (strain IMS101) GN=Tery_1774 PE=4 SV=1	Q114P0	17	26	15	18	11	24
5'-nucleotidase SurE OS=Trichodesmium erythraeum (strain IMS101) GN=surE PE=3 SV=1	Q10YV3	4	6	5	4	2	5
50S ribosomal protein L1 OS=Trichodesmium erythraeum (strain IMS101) GN=rplA PE=3 SV=1	Q119S7	33	35	31	45	31	35
50S ribosomal protein L10 OS=Trichodesmium erythraeum (strain IMS101) GN=rplJ PE=3 SV=1	Q119S8	33	36	37	32	30	35
50S ribosomal protein L11 OS=Trichodesmium erythraeum (strain IMS101) GN=rplK PE=3 SV=1	Q119S6	51	49	51	52	36	56
50S ribosomal protein L13 OS=Trichodesmium erythraeum (strain IMS101) GN=rplM PE=3 SV=1	Q110D4	65	68	69	65	45	67
50S ribosomal protein L14 OS=Trichodesmium erythraeum (strain IMS101) GN=rplN PE=3 SV=1	Q110B7	25	22	22	23	13	21
50S ribosomal protein L15 OS=Trichodesmium erythraeum (strain IMS101) GN=rplO PE=3 SV=1	Q110C4	35	29	36	25	20	33
50S ribosomal protein L16 OS=Trichodesmium erythraeum (strain IMS101) GN=rplP PE=3 SV=1	Q110B4	23	18	20	21	15	20
50S ribosomal protein L17 OS=Trichodesmium erythraeum (strain IMS101) GN=rplQ PE=3 SV=1	Q110D2	25	26	22	19	16	26
50S ribosomal protein L18 OS=Trichodesmium erythraeum (strain IMS101) GN=rplR PE=3 SV=1	Q110C2	19	18	18	19	12	18
50S ribosomal protein L19 OS=Trichodesmium erythraeum (strain IMS101) GN=rplS PE=3 SV=1	Q119S3	52	46	49	40	32	49
50S ribosomal protein L2 OS=Trichodesmium erythraeum (strain IMS101) GN=rplB PE=3 SV=1	Q110B0	17	24	20	19	20	24
50S ribosomal protein L20 OS=Trichodesmium erythraeum (strain IMS101) GN=rplT PE=3 SV=1	Q114D6	7	6	6	5	5	6
50S ribosomal protein L21 OS=Trichodesmium erythraeum (strain IMS101) GN=rplU PE=3 SV=1	Q10ZG6	26	27	26	23	13	28
50S ribosomal protein L22 OS=Trichodesmium erythraeum (strain IMS101) GN=rplV PE=3 SV=1	Q110B2	28	28	29	27	14	28
50S ribosomal protein L23 OS=Trichodesmium erythraeum (strain IMS101) GN=rplW PE=3 SV=1	Q110A9	56	56	56	54	45	51
50S ribosomal protein L24 OS=Trichodesmium erythraeum (strain IMS101) GN=rplX PE=3 SV=1	Q110B8	5	6	6	6	4	5
50S ribosomal protein L27 OS=Trichodesmium erythraeum (strain IMS101) GN=rpmA PE=3 SV=1	Q10ZG7	8	8	11	10	6	9
50S ribosomal protein L28 OS=Trichodesmium erythraeum (strain IMS101) GN=rpmB PE=3 SV=1	Q10X90	8	8	7	0	8	9
50S ribosomal protein L29 OS=Trichodesmium erythraeum (strain IMS101) GN=rpmC PE=3 SV=1	Q110B5	19	23	21	20	14	23
50S ribosomal protein L3 OS=Trichodesmium erythraeum (strain IMS101) GN=rplC PE=3 SV=1	Q110A7	53	55	59	61	41	59
50S ribosomal protein L31 OS=Trichodesmium erythraeum (strain IMS101) GN=rpmE PE=3 SV=1	Q110D6	6	8	9	7	4	8
50S ribosomal protein L32 OS=Trichodesmium erythraeum (strain IMS101) GN=rpmF PE=3 SV=1	Q118B3	0	0	0	0	0	0
50S ribosomal protein L33 OS=Trichodesmium erythraeum (strain IMS101) GN=rpmG PE=3 SV=1	Q10Y90	17	11	17	13	8	17
50S ribosomal protein L36 OS=Trichodesmium erythraeum (strain IMS101) GN=rpmJ PE=3 SV=1	Q110C8	0	0	0	0	0	0
50S ribosomal protein L4 OS=Trichodesmium erythraeum (strain IMS101) GN=rplD PE=3 SV=1	Q110A8	37	38	40	33	29	44
50S ribosomal protein L5 OS=Trichodesmium erythraeum (strain IMS101) GN=rplE PE=3 SV=1	Q110B9	42	45	45	39	26	45
50S ribosomal protein L6 OS=Trichodesmium erythraeum (strain IMS101) GN=rplF PE=3 SV=1	Q110C1	58	57	58	51	34	56
50S ribosomal protein L7/L12 OS=Trichodesmium erythraeum (strain IMS101) GN=rplL PE=3 SV=1	Q119S9	43	34	34	39	32	35
50S ribosomal protein L9 OS=Trichodesmium erythraeum (strain IMS101) GN=rplI PE=3 SV=1	Q115S4	32	31	28	36	16	29
6-phosphogluconate dehydrogenase, decarboxylating OS=Trichodesmium erythraeum (strain IMS101) GN=Tery_1834 PE=3 SV=1	Q114I4	224	212	224	238	139	218
6-phosphogluconolactonase OS=Trichodesmium erythraeum (strain IMS101) GN=Tery_0535 PE=4 SV=1	Q118T7	37	38	45	36	28	39
6,7-dimethyl-8-ribityllumazine synthase OS=Trichodesmium erythraeum (strain IMS101) GN=ribH PE=3 SV=1	Q115U3	6	5	5	5	4	4
60 kDa chaperonin 1 OS=Trichodesmium erythraeum (strain IMS101) GN=groL1 PE=3 SV=1	Q119S1	283	255	265	297	196	248
60 kDa chaperonin 2 OS=Trichodesmium erythraeum (strain IMS101) GN=groL2 PE=3 SV=1	Q10WQ4	350	358	393	385	252	356
60 kDa inner membrane insertion protein OS=Trichodesmium erythraeum (strain IMS101) GN=Tery_4710 PE=3 SV=1	Q10VQ1	10	9	10	9	7	7
7,8-dihydroneopterin aldolase OS=Trichodesmium erythraeum (strain IMS101) GN=Tery_0687 PE=3 SV=1	Q118F0	18	16	17	19	15	17
8-amino-7-oxononanoate synthase OS=Trichodesmium erythraeum (strain IMS101) GN=Tery_1973 PE=3 SV=1	Q113V0	0	0	0	0	0	0
AAA ATPase, central region OS=Trichodesmium erythraeum (strain IMS101) GN=Tery_1047 PE=4 SV=1	Q117A5	79	79	89	75	66	80
AAA ATPase, central region OS=Trichodesmium erythraeum (strain IMS101) GN=Tery_2214 PE=4 SV=1	Q112Y1	0	0	0	2	0	1
AAA ATPase, central region OS=Trichodesmium erythraeum (strain IMS101) GN=Tery_4713 PE=4 SV=1	Q10VP8	0	0	0	1	0	0
ABC transporter related OS=Trichodesmium erythraeum (strain IMS101) GN=Tery_0199 PE=3 SV=1	Q119Y6	4	1	2	3	0	5
ABC transporter related OS=Trichodesmium erythraeum (strain IMS101) GN=Tery_0299 PE=4 SV=1	Q119P6	0	2	2	0	3	0
ABC transporter related OS=Trichodesmium erythraeum (strain IMS101) GN=Tery_0331 PE=4 SV=1	Q119L9	0	0	0	0	0	0
ABC transporter related OS=Trichodesmium erythraeum (strain IMS101) GN=Tery_0800 PE=4 SV=1	REVERSE_Q117V7	0	0	0	0	0	0
ABC transporter related OS=Trichodesmium erythraeum (strain IMS101) GN=Tery_0800 PE=4 SV=1	Q117V7	0	0	0	0	0	0
ABC transporter related OS=Trichodesmium erythraeum (strain IMS101) GN=Tery_0828 PE=4 SV=1	Q117T2	0	0	0	0	0	0
ABC transporter related OS=Trichodesmium erythraeum (strain IMS101) GN=Tery_2001 PE=4 SV=1	Q113S4	0	1	2	2	0	2
ABC transporter related OS=Trichodesmium erythraeum (strain IMS101) GN=Tery_2411 PE=4 SV=1	Q112E6	5	1	4	3	2	5
ABC transporter related OS=Trichodesmium erythraeum (strain IMS101) GN=Tery_3222 PE=3 SV=1	Q10ZI4	0	0	3	2	0	0
ABC transporter related OS=Trichodesmium erythraeum (strain IMS101) GN=Tery_3394 PE=4 SV=1	Q10Z29	3	2	1	4	0	2
ABC transporter related OS=Trichodesmium erythraeum (strain IMS101) GN=Tery_3407 PE=4 SV=1	Q10Z16	0	0	0	0	0	0
ABC transporter related OS=Trichodesmium erythraeum (strain IMS101) GN=Tery_3746 PE=4 SV=1	Q10Y75	1	1	1	1	1	1
ABC transporter related OS=Trichodesmium erythraeum (strain IMS101) GN=Tery_3782 PE=4 SV=1	Q10Y45	0	0	0	0	0	0
ABC transporter related OS=Trichodesmium erythraeum (strain IMS101) GN=Tery_4399 PE=4 SV=1	Q10WI7	0	0	0	0	0	0
ABC-1 OS=Trichodesmium erythraeum (strain IMS101) GN=Tery_1043 PE=4 SV=1	REVERSE_Q117A9	0	0	0	0	0	0
ABC-1 OS=Trichodesmium erythraeum (strain IMS101) GN=Tery_1043 PE=4 SV=1	Q117A9	0	0	0	0	0	0
ABC-1 OS=Trichodesmium erythraeum (strain IMS101) GN=Tery_2512 PE=4 SV=1	Q111V6	0	2	2	2	1	2
ABC-1 OS=Trichodesmium erythraeum (strain IMS101) GN=Tery_3296 PE=4 SV=1	Q10ZC0	12	7	11	6	4	13
ABC-1 OS=Trichodesmium erythraeum (strain IMS101) GN=Tery_3425 PE=4 SV=1	Q10Z03	1	0	2	0	0	1
ABC-type phosphate transport system periplasmic component-like OS=Trichodesmium erythraeum (strain IMS101) GN=Tery_1967 PE=4 SV=1	Q113V5	6	4	5	5	0	5
Abhydrolase domain containing 14A-like OS=Trichodesmium erythraeum (strain IMS101) GN=Tery_0781 PE=4 SV=1	Q117X2	2	3	5	3	2	3
Abortive infection protein OS=Trichodesmium erythraeum (strain IMS101) GN=Tery_2182 PE=4 SV=1	Q113B1	2	0	0	1	0	3
Acetolactate synthase OS=Trichodesmium erythraeum (strain IMS101) GN=Tery_2843 PE=3 SV=1	Q110Q7	0	4	5	4	3	5
Acetolactate synthase, large subunit OS=Trichodesmium erythraeum (strain IMS101) GN=Tery_1928 PE=3 SV=1	Q113Z1	36	40	42	30	21	42
Acetolactate synthase, small subunit OS=Trichodesmium erythraeum (strain IMS101) GN=Tery_1850 PE=4 SV=1	Q114G8	17	13	16	17	11	15
Acetyl-coenzyme A carboxylase carboxyl transferase subunit alpha / biotin carboxylase OS=Trichodesmium erythraeum (strain IMS101) GN=Tery_3707 PE=4 SV=1	Q10YA8	11	15	19	15	12	11
Acetyl-coenzyme A carboxylase carboxyl transferase subunit alpha OS=Trichodesmium erythraeum (strain IMS101) GN=accA PE=3 SV=1	Q117H3	2	0	2	3	0	3
Acetyl-coenzyme A carboxylase carboxyl transferase subunit beta OS=Trichodesmium erythraeum (strain IMS101) GN=accD PE=3 SV=1	Q111F1	7	8	7	6	5	9
Acetyl-coenzyme A synthetase OS=Trichodesmium erythraeum (strain IMS101) GN=acsA PE=3 SV=1	Q112I3	43	42	44	42	38	49
Acetylglutamate kinase OS=Trichodesmium erythraeum (strain IMS101) GN=argB PE=3 SV=1	Q116Q9	24	23	25	24	17	26
Acetylornithine aminotransferase OS=Trichodesmium erythraeum (strain IMS101) GN=argD PE=3 SV=1	Q111I1	23	19	19	20	10	19
Acireductone dioxygenase OS=Trichodesmium erythraeum (strain IMS101) GN=mtnD PE=3 SV=1	Q111G3	0	2	0	0	0	2
Aconitate hydratase B OS=Trichodesmium erythraeum (strain IMS101) GN=Tery_0664 PE=3 SV=1	Q118H1	7	9	9	10	3	7
Aconitate hydratase B OS=Trichodesmium erythraeum (strain IMS101) GN=Tery_0664 PE=3 SV=1	REVERSE_Q118H1	0	0	0	0	0	0
Acriflavin resistance protein OS=Trichodesmium erythraeum (strain IMS101) GN=Tery_2378 PE=3 SV=1	Q112H6	0	0	1	1	0	0
Acyl carrier protein OS=Trichodesmium erythraeum (strain IMS101) GN=acpP PE=3 SV=1	Q119B3	32	26	36	30	29	27
Acyl-[acyl-carrier-protein]--UDP-N-acetylglucosamine O-acyltransferase OS=Trichodesmium erythraeum (strain IMS101) GN=lpxA PE=3 SV=1	Q10ZA1	1	0	0	0	0	0
Adenine phosphoribosyltransferase OS=Trichodesmium erythraeum (strain IMS101) GN=apt PE=3 SV=1	Q119D0	4	5	5	8	6	5
Adenosylhomocysteinase OS=Trichodesmium erythraeum (strain IMS101) GN=ahcY PE=3 SV=1	Q111K6	97	113	117	92	72	102
Adenylate cyclase OS=Trichodesmium erythraeum (strain IMS101) GN=Tery_2731 PE=4 SV=1	Q111A9	0	0	0	0	0	1
Adenylate kinase OS=Trichodesmium erythraeum (strain IMS101) GN=adk PE=3 SV=1	Q110C6	40	38	42	36	31	46
Adenylate/guanylate cyclase OS=Trichodesmium erythraeum (strain IMS101) GN=Tery_0647 PE=4 SV=1	Q118I7	0	1	0	2	0	2
Adenylate/guanylate cyclase OS=Trichodesmium erythraeum (strain IMS101) GN=Tery_2417 PE=3 SV=1	Q112E0	0	0	0	0	0	1
Adenylate/guanylate cyclase OS=Trichodesmium erythraeum (strain IMS101) GN=Tery_3155 PE=4 SV=1	Q10ZP1	0	0	0	0	0	0
Adenylosuccinate lyase OS=Trichodesmium erythraeum (strain IMS101) GN=Tery_4169 PE=3 SV=1	Q10X49	7	6	9	6	0	9
Adenylosuccinate synthetase OS=Trichodesmium erythraeum (strain IMS101) GN=purA PE=3 SV=1	Q10ZD0	22	21	23	17	14	22
Adenylyl-sulfate kinase OS=Trichodesmium erythraeum (strain IMS101) GN=cysC PE=3 SV=1	Q113Z6	23	21	23	22	17	19
Alanine dehydrogenase OS=Trichodesmium erythraeum (strain IMS101) GN=Tery_3174 PE=3 SV=1	Q10ZM3	5	8	4	7	4	4
Alanine--tRNA ligase OS=Trichodesmium erythraeum (strain IMS101) GN=alaS PE=3 SV=1	Q10VG8	6	8	7	4	4	14
Alcohol dehydrogenase, zinc-binding OS=Trichodesmium erythraeum (strain IMS101) GN=Tery_0561 PE=4 SV=1	Q118R5	5	5	7	7	3	5
Alcohol dehydrogenase, zinc-binding OS=Trichodesmium erythraeum (strain IMS101) GN=Tery_0562 PE=4 SV=1	Q118R4	0	0	1	0	0	0
Alcohol dehydrogenase, zinc-binding OS=Trichodesmium erythraeum (strain IMS101) GN=Tery_1832 PE=4 SV=1	Q114I6	14	14	13	13	12	16
Alcohol dehydrogenase, zinc-binding OS=Trichodesmium erythraeum (strain IMS101) GN=Tery_2910 PE=4 SV=1	Q110J6	4	4	4	8	2	5
Aldehyde decarbonylase OS=Trichodesmium erythraeum (strain IMS101) GN=Tery_2280 PE=3 SV=1	Q112R8	9	9	8	7	6	9
Aldehyde dehydrogenase (Acceptor) OS=Trichodesmium erythraeum (strain IMS101) GN=Tery_2599 PE=3 SV=1	Q111M9	80	82	85	78	56	85
Aldehyde dehydrogenase OS=Trichodesmium erythraeum (strain IMS101) GN=Tery_1926 PE=4 SV=1	Q113Z3	43	42	45	41	31	46
Aldehyde dehydrogenase OS=Trichodesmium erythraeum (strain IMS101) GN=Tery_2652 PE=3 SV=1	Q111H8	5	3	4	2	0	4
Aldo/keto reductase OS=Trichodesmium erythraeum (strain IMS101) GN=Tery_0458 PE=4 SV=1	Q119A8	11	12	11	10	9	10
Aldo/keto reductase OS=Trichodesmium erythraeum (strain IMS101) GN=Tery_2155 PE=4 SV=1	Q113D5	1	0	0	0	0	0
Aldo/keto reductase OS=Trichodesmium erythraeum (strain IMS101) GN=Tery_2669 PE=4 SV=1	Q111G2	15	15	13	11	9	14
Aldo/keto reductase OS=Trichodesmium erythraeum (strain IMS101) GN=Tery_2756 PE=4 SV=1	Q110Y5	7	7	6	6	4	3
Aldo/keto reductase OS=Trichodesmium erythraeum (strain IMS101) GN=Tery_3126 PE=4 SV=1	Q10ZR6	9	10	12	7	6	10
Aldo/keto reductase OS=Trichodesmium erythraeum (strain IMS101) GN=Tery_4535 PE=4 SV=1	Q10W59	0	0	1	0	0	1
Aldose 1-epimerase OS=Trichodesmium erythraeum (strain IMS101) GN=Tery_3963 PE=4 SV=1	Q10XN6	23	23	21	20	20	28
Alkyl hydroperoxide reductase/ Thiol specific antioxidant/ Mal allergen OS=Trichodesmium erythraeum (strain IMS101) GN=Tery_0235 PE=4 SV=1	Q119V1	2	2	3	3	1	2
Allergen V5/Tpx-1 related OS=Trichodesmium erythraeum (strain IMS101) GN=Tery_4341 PE=4 SV=1	Q10WP1	0	0	2	0	0	0
Allophycocyanin, beta subunit OS=Trichodesmium erythraeum (strain IMS101) GN=Tery_3649 PE=3 SV=1	Q10YG1	483	460	460	463	324	416
Allophycocyanin, beta subunit OS=Trichodesmium erythraeum (strain IMS101) GN=Tery_3835 PE=3 SV=1	Q10XZ6	72	81	81	71	59	83
Alpha amylase, catalytic region OS=Trichodesmium erythraeum (strain IMS101) GN=Tery_4392 PE=4 SV=1	Q10WJ4	4	4	6	3	1	4
Alpha-1,4 glucan phosphorylase OS=Trichodesmium erythraeum (strain IMS101) GN=Tery_0218 PE=3 SV=1	Q119W7	41	39	45	37	24	40
Alpha-1,4 glucan phosphorylase OS=Trichodesmium erythraeum (strain IMS101) GN=Tery_0218 PE=3 SV=1	REVERSE_Q119W7	2	0	0	0	4	0
Alpha-1,4 glucan phosphorylase OS=Trichodesmium erythraeum (strain IMS101) GN=Tery_3694 PE=3 SV=1	Q10YB9	76	74	75	70	48	74
Alpha-amylase 1 OS=Homo sapiens GN=AMY1A PE=1 SV=2	REVERSE_P04745	0	0	0	0	0	0
Alpha-amylase 1 OS=Homo sapiens GN=AMY1A PE=1 SV=2	P04745	0	0	0	0	0	0
Alpha-glucosidase OS=Trichodesmium erythraeum (strain IMS101) GN=Tery_4624 PE=3 SV=1	Q10VX8	25	27	30	26	21	21
Alpha-glucosidase OS=Trichodesmium erythraeum (strain IMS101) GN=Tery_4624 PE=3 SV=1	REVERSE_Q10VX8	1	0	0	0	0	0
Alpha-S1-casein OS=Bos taurus GN=CSN1S1 PE=1 SV=2	P02662	0	0	0	0	0	0
Alpha/beta hydrolase fold OS=Trichodesmium erythraeum (strain IMS101) GN=Tery_0604 PE=4 SV=1	Q118M6	0	0	0	0	0	0
Alpha/beta hydrolase fold OS=Trichodesmium erythraeum (strain IMS101) GN=Tery_1797 PE=4 SV=1	Q114L8	7	8	5	6	9	10
Alpha/beta hydrolase fold OS=Trichodesmium erythraeum (strain IMS101) GN=Tery_3526 PE=4 SV=1	Q10YQ9	0	0	0	0	0	0
Alpha/beta hydrolase fold OS=Trichodesmium erythraeum (strain IMS101) GN=Tery_3663 PE=4 SV=1	Q10YE9	10	8	13	8	3	17
Alpha/beta hydrolase fold OS=Trichodesmium erythraeum (strain IMS101) GN=Tery_4162 PE=4 SV=1	Q10X56	3	6	4	2	5	3
Aluminium resistance OS=Trichodesmium erythraeum (strain IMS101) GN=Tery_1438 PE=4 SV=1	Q115U1	0	0	0	2	0	0
Amidohydrolase 3 OS=Trichodesmium erythraeum (strain IMS101) GN=Tery_4570 PE=4 SV=1	Q10W28	0	0	0	0	0	0
Amidohydrolase OS=Trichodesmium erythraeum (strain IMS101) GN=Tery_3690 PE=4 SV=1	Q10YC3	3	4	4	2	1	3
Amidophosphoribosyltransferase OS=Trichodesmium erythraeum (strain IMS101) GN=purF PE=3 SV=1	Q10YB6	0	0	0	0	0	0
Amine oxidase OS=Trichodesmium erythraeum (strain IMS101) GN=Tery_1383 PE=3 SV=1	Q115Y4	3	4	2	5	2	3
Amino acid permease-associated region OS=Trichodesmium erythraeum (strain IMS101) GN=Tery_1903 PE=4 SV=1	Q114B6	1	2	1	1	0	1
Aminodeoxychorismate lyase OS=Trichodesmium erythraeum (strain IMS101) GN=Tery_4376 PE=4 SV=1	Q10WK7	0	0	0	0	0	2
Aminomethyltransferase OS=Trichodesmium erythraeum (strain IMS101) GN=gcvT PE=3 SV=1	Q113P0	35	38	38	36	28	34
Aminomethyltransferase OS=Trichodesmium erythraeum (strain IMS101) GN=gcvT PE=3 SV=1	REVERSE_Q113P0	0	0	0	0	0	0
Aminopeptidase P. Metallo peptidase. MEROPS family M24B OS=Trichodesmium erythraeum (strain IMS101) GN=Tery_4599 PE=4 SV=1	Q10VZ9	15	11	13	11	9	11
Aminopyrimidine aminohydrolase OS=Trichodesmium erythraeum (strain IMS101) GN=Tery_0300 PE=3 SV=1	Q119P5	7	7	7	6	4	8
Aminotransferase OS=Trichodesmium erythraeum (strain IMS101) GN=Tery_0293 PE=3 SV=1	Q119Q1	26	30	30	22	24	39
Aminotransferase OS=Trichodesmium erythraeum (strain IMS101) GN=Tery_0487 PE=3 SV=1	Q118Y1	2	1	1	2	0	1
Aminotransferase OS=Trichodesmium erythraeum (strain IMS101) GN=Tery_1023 PE=4 SV=1	Q117C5	6	7	8	4	8	4
Aminotransferase OS=Trichodesmium erythraeum (strain IMS101) GN=Tery_3525 PE=4 SV=1	Q10YR0	0	0	1	0	0	0
Aminotransferase OS=Trichodesmium erythraeum (strain IMS101) GN=Tery_3688 PE=4 SV=1	Q10YC5	5	7	7	7	6	6
Aminotransferase, class V OS=Trichodesmium erythraeum (strain IMS101) GN=Tery_0185 PE=3 SV=1	Q119Z8	19	16	22	19	10	15
Aminotransferase, class V OS=Trichodesmium erythraeum (strain IMS101) GN=Tery_0201 PE=3 SV=1	Q119Y4	18	23	24	18	17	24
AMP-dependent synthetase and ligase OS=Trichodesmium erythraeum (strain IMS101) GN=Tery_1829 PE=4 SV=1	Q114I9	17	18	21	13	11	16
AMP-dependent synthetase and ligase OS=Trichodesmium erythraeum (strain IMS101) GN=Tery_2109 PE=4 SV=1	Q113H9	11	8	11	12	8	13
AMP-dependent synthetase and ligase OS=Trichodesmium erythraeum (strain IMS101) GN=Tery_3181 PE=4 SV=1	Q10ZL8	0	0	0	0	0	0
AMP-dependent synthetase and ligase OS=Trichodesmium erythraeum (strain IMS101) GN=Tery_3820 PE=4 SV=1	Q10Y10	6	5	7	4	5	5
Anion-transporting ATPase OS=Trichodesmium erythraeum (strain IMS101) GN=Tery_0875 PE=4 SV=1	Q117P6	41	38	40	40	29	39
Ankyrin OS=Trichodesmium erythraeum (strain IMS101) GN=Tery_0982 PE=4 SV=1	Q117G2	13	11	12	9	7	14
Ankyrin OS=Trichodesmium erythraeum (strain IMS101) GN=Tery_1000 PE=4 SV=1	Q117E6	4	4	2	1	3	4
Anthranilate phosphoribosyltransferase OS=Trichodesmium erythraeum (strain IMS101) GN=trpD PE=3 SV=1	Q112P2	2	3	2	0	2	4
Anthranilate synthase, component I OS=Trichodesmium erythraeum (strain IMS101) GN=Tery_3792 PE=4 SV=1	Q10Y36	1	1	1	0	1	1
Anti-sigma factor antagonist OS=Trichodesmium erythraeum (strain IMS101) GN=Tery_0920 PE=3 SV=1	Q117K6	3	2	2	2	0	1
Anti-sigma factor antagonist OS=Trichodesmium erythraeum (strain IMS101) GN=Tery_1167 PE=3 SV=1	Q116P6	2	3	2	3	4	3
Anti-sigma factor antagonist OS=Trichodesmium erythraeum (strain IMS101) GN=Tery_5015 PE=3 SV=1	Q10UZ7	20	26	28	22	25	26
Anti-sigma factor antagonist OS=Trichodesmium erythraeum (strain IMS101) GN=Tery_5017 PE=3 SV=1	Q10UZ5	5	4	6	5	3	5
Anti-sigma-factor antagonist (STAS) domain protein OS=Trichodesmium erythraeum (strain IMS101) GN=Tery_2311 PE=4 SV=1	Q112N9	15	12	14	11	9	14
Arginine biosynthesis bifunctional protein ArgJ OS=Trichodesmium erythraeum (strain IMS101) GN=argJ PE=3 SV=1	Q11AB4	34	33	33	29	20	34
Arginine--tRNA ligase OS=Trichodesmium erythraeum (strain IMS101) GN=argS PE=3 SV=1	Q10XL4	31	31	37	35	17	32
Argininosuccinate lyase OS=Trichodesmium erythraeum (strain IMS101) GN=argH PE=3 SV=1	Q118A3	16	14	15	14	8	17
Argininosuccinate synthase OS=Trichodesmium erythraeum (strain IMS101) GN=argG PE=3 SV=1	Q117P0	22	22	26	32	21	20
Arsenite-activated ATPase ArsA OS=Trichodesmium erythraeum (strain IMS101) GN=Tery_0013 PE=4 SV=1	Q11AD6	8	7	8	10	6	10
Arsenite-activated ATPase ArsA OS=Trichodesmium erythraeum (strain IMS101) GN=Tery_2327 PE=4 SV=1	Q112M5	23	27	22	22	19	30
Asparaginase OS=Trichodesmium erythraeum (strain IMS101) GN=Tery_0258 PE=4 SV=1	Q119T2	13	14	16	13	9	13
Asparaginase OS=Trichodesmium erythraeum (strain IMS101) GN=Tery_4641 PE=4 SV=1	Q10VW2	8	8	7	6	4	7
Asparagine--tRNA ligase OS=Trichodesmium erythraeum (strain IMS101) GN=asnS PE=3 SV=1	Q112U9	22	18	19	18	14	20
Aspartate carbamoyltransferase OS=Trichodesmium erythraeum (strain IMS101) GN=pyrB PE=3 SV=1	Q10WL4	0	0	0	0	0	0
Aspartate kinase OS=Trichodesmium erythraeum (strain IMS101) GN=Tery_0087 PE=4 SV=1	Q11A81	0	1	2	2	1	1
Aspartate kinase OS=Trichodesmium erythraeum (strain IMS101) GN=Tery_0087 PE=4 SV=1	REVERSE_Q11A81	0	0	0	0	0	0
Aspartate--tRNA(Asp/Asn) ligase OS=Trichodesmium erythraeum (strain IMS101) GN=aspS PE=3 SV=1	Q112K0	22	20	22	18	16	22
Aspartate-semialdehyde dehydrogenase OS=Trichodesmium erythraeum (strain IMS101) GN=asd PE=3 SV=1	Q118P3	20	17	18	15	14	20
Aspartyl/glutamyl-tRNA(Asn/Gln) amidotransferase subunit B OS=Trichodesmium erythraeum (strain IMS101) GN=gatB PE=3 SV=1	Q10XY9	46	44	45	40	33	50
Aspartyl/glutamyl-tRNA(Asn/Gln) amidotransferase subunit C OS=Trichodesmium erythraeum (strain IMS101) GN=gatC PE=3 SV=1	Q10W19	0	2	0	2	0	2
Assimilatory nitrite reductase (Ferredoxin) OS=Trichodesmium erythraeum (strain IMS101) GN=Tery_1068 PE=3 SV=1	Q116Y7	0	2	1	2	2	2
ATP phosphoribosyltransferase OS=Trichodesmium erythraeum (strain IMS101) GN=hisG PE=3 SV=1	Q118Q1	5	5	3	6	3	5
ATP synthase epsilon chain OS=Trichodesmium erythraeum (strain IMS101) GN=atpC PE=3 SV=1	Q10Z37	27	29	29	26	24	30
ATP synthase gamma chain OS=Trichodesmium erythraeum (strain IMS101) GN=atpG PE=3 SV=1	Q112Z7	124	112	125	118	80	119
ATP synthase subunit a OS=Trichodesmium erythraeum (strain IMS101) GN=atpB PE=3 SV=1	Q112Z1	0	0	0	0	0	0
ATP synthase subunit alpha OS=Trichodesmium erythraeum (strain IMS101) GN=atpA PE=3 SV=1	Q112Z6	299	269	288	339	209	264
ATP synthase subunit b OS=Trichodesmium erythraeum (strain IMS101) GN=atpF PE=3 SV=1	Q112Z4	54	60	48	48	37	52
ATP synthase subunit b' OS=Trichodesmium erythraeum (strain IMS101) GN=atpG PE=3 SV=1	Q112Z3	68	61	58	68	42	54
ATP synthase subunit beta OS=Trichodesmium erythraeum (strain IMS101) GN=atpD PE=3 SV=1	Q10Z38	419	417	430	449	324	408
ATP synthase subunit c OS=Trichodesmium erythraeum (strain IMS101) GN=atpE PE=3 SV=1	Q112Z2	0	0	0	0	0	0
ATP synthase subunit delta OS=Trichodesmium erythraeum (strain IMS101) GN=atpH PE=3 SV=1	Q112Z5	120	113	117	122	99	117
ATP-binding region, ATPase-like OS=Trichodesmium erythraeum (strain IMS101) GN=Tery_2556 PE=4 SV=1	Q111R7	0	0	0	0	0	0
ATP-binding region, ATPase-like OS=Trichodesmium erythraeum (strain IMS101) GN=Tery_2556 PE=4 SV=1	REVERSE_Q111R7	0	0	0	0	0	0
ATP-binding region, ATPase-like OS=Trichodesmium erythraeum (strain IMS101) GN=Tery_4127 PE=4 SV=1	Q10X89	71	61	70	61	36	58
ATP-dependent Clp protease adapter protein ClpS OS=Trichodesmium erythraeum (strain IMS101) GN=clpS PE=3 SV=1	Q10Y18	4	3	6	4	0	6
ATP-dependent Clp protease adapter protein ClpS OS=Trichodesmium erythraeum (strain IMS101) GN=clpS PE=3 SV=1	Q116U1	0	0	2	0	0	1
ATP-dependent Clp protease ATP-binding subunit ClpX OS=Trichodesmium erythraeum (strain IMS101) GN=clpX PE=3 SV=1	Q118P6	2	6	7	5	1	6
ATP-dependent Clp protease proteolytic subunit OS=Trichodesmium erythraeum (strain IMS101) GN=clpP PE=3 SV=1	Q116I0	24	24	23	24	19	25
ATP-dependent Clp protease proteolytic subunit OS=Trichodesmium erythraeum (strain IMS101) GN=clpP PE=3 SV=1	Q118P5	18	21	24	22	12	20
ATP-dependent Clp protease proteolytic subunit OS=Trichodesmium erythraeum (strain IMS101) GN=clpP PE=3 SV=1	Q115M5	2	6	6	3	5	4
ATP-dependent Clp protease proteolytic subunit OS=Trichodesmium erythraeum (strain IMS101) GN=Tery_1246 PE=3 SV=1	Q116I1	46	49	50	44	35	49
ATP-dependent dethiobiotin synthetase BioD OS=Trichodesmium erythraeum (strain IMS101) GN=bioD PE=3 SV=1	Q114H6	0	0	0	1	0	0
ATP-dependent DNA helicase RecQ OS=Trichodesmium erythraeum (strain IMS101) GN=Tery_3264 PE=4 SV=1	Q10ZE8	0	0	0	0	0	0
ATP-dependent DNA helicase RecQ OS=Trichodesmium erythraeum (strain IMS101) GN=Tery_3530 PE=4 SV=1	REVERSE_Q10YQ6	0	0	0	0	0	0
ATP-dependent zinc metalloprotease FtsH OS=Trichodesmium erythraeum (strain IMS101) GN=ftsH PE=3 SV=1	Q10W04	46	41	43	45	30	44
ATP-dependent zinc metalloprotease FtsH OS=Trichodesmium erythraeum (strain IMS101) GN=ftsH PE=3 SV=1	Q10ZF7	13	12	12	14	8	13
ATP-dependent zinc metalloprotease FtsH OS=Trichodesmium erythraeum (strain IMS101) GN=ftsH PE=3 SV=1	Q10Y67	47	42	46	44	32	46
ATP-dependent zinc metalloprotease FtsH OS=Trichodesmium erythraeum (strain IMS101) GN=ftsH PE=3 SV=1	Q10YV0	0	0	0	0	0	1
ATP-dependent zinc metalloprotease FtsH OS=Trichodesmium erythraeum (strain IMS101) GN=ftsH PE=3 SV=1	REVERSE_Q10ZF7	0	0	0	0	0	0
ATPase (AAA+ superfamily)-like OS=Trichodesmium erythraeum (strain IMS101) GN=Tery_3115 PE=4 SV=1	REVERSE_Q10ZS6	0	0	0	1	0	0
ATPase (AAA+ superfamily)-like OS=Trichodesmium erythraeum (strain IMS101) GN=Tery_3115 PE=4 SV=1	Q10ZS6	1	0	2	2	0	0
ATPase AAA-2 OS=Trichodesmium erythraeum (strain IMS101) GN=Tery_2437 PE=3 SV=1	Q112C2	141	128	142	127	83	131
ATPase AAA-2 OS=Trichodesmium erythraeum (strain IMS101) GN=Tery_3151 PE=4 SV=1	Q10ZP3	0	0	0	0	0	0
ATPase AAA-2 OS=Trichodesmium erythraeum (strain IMS101) GN=Tery_3380 PE=3 SV=1	Q10Z43	72	71	67	61	39	63
ATPase associated with various cellular activities, AAA_3 OS=Trichodesmium erythraeum (strain IMS101) GN=Tery_1862 PE=4 SV=1	Q114F6	5	3	4	1	3	4
ATPase associated with various cellular activities, AAA_5 OS=Trichodesmium erythraeum (strain IMS101) GN=Tery_1430 PE=4 SV=1	Q115U8	0	0	0	0	0	0
ATPase associated with various cellular activities, AAA_5 OS=Trichodesmium erythraeum (strain IMS101) GN=Tery_2229 PE=4 SV=1	Q112W6	0	2	1	0	1	1
ATPase OS=Trichodesmium erythraeum (strain IMS101) GN=Tery_4452 PE=4 SV=1	REVERSE_Q10WD5	0	0	0	1	0	0
ATPase-like OS=Trichodesmium erythraeum (strain IMS101) GN=Tery_3642 PE=4 SV=1	Q10YG7	1	0	0	0	0	0
ATPase-like protein OS=Trichodesmium erythraeum (strain IMS101) GN=Tery_1732 PE=4 SV=1	Q114T0	0	0	0	0	0	0
ATPase-like protein OS=Trichodesmium erythraeum (strain IMS101) GN=Tery_2060 PE=4 SV=1	Q113M3	0	0	0	0	0	1
ATPase-like protein OS=Trichodesmium erythraeum (strain IMS101) GN=Tery_2060 PE=4 SV=1	REVERSE_Q113M3	0	0	0	0	0	0
ATPase-like protein OS=Trichodesmium erythraeum (strain IMS101) GN=Tery_2133 PE=4 SV=1	Q113F7	0	1	1	1	0	0
Bacterial nucleoid protein Hbs OS=Trichodesmium erythraeum (strain IMS101) GN=Tery_1610 PE=3 SV=1	Q115D5	128	112	119	133	92	116
Band 7 protein OS=Trichodesmium erythraeum (strain IMS101) GN=Tery_0313 PE=4 SV=1	Q119N5	45	49	48	45	37	42
Band 7 protein OS=Trichodesmium erythraeum (strain IMS101) GN=Tery_0314 PE=4 SV=1	Q119N4	63	51	59	56	37	58
Basic membrane lipoprotein OS=Trichodesmium erythraeum (strain IMS101) GN=Tery_3674 PE=4 SV=1	Q10YD9	8	4	8	8	4	6
Beta-Ig-H3/fasciclin OS=Trichodesmium erythraeum (strain IMS101) GN=Tery_3372 PE=4 SV=1	Q10Z50	80	87	83	88	57	87
Beta-Ig-H3/fasciclin OS=Trichodesmium erythraeum (strain IMS101) GN=Tery_3373 PE=4 SV=1	Q10Z49	0	2	0	1	0	2
Beta-ketoacyl synthase OS=Trichodesmium erythraeum (strain IMS101) GN=Tery_3819 PE=4 SV=1	REVERSE_Q10Y11	0	0	0	2	0	0
Beta-ketoacyl synthase OS=Trichodesmium erythraeum (strain IMS101) GN=Tery_3819 PE=4 SV=1	Q10Y11	95	87	99	91	66	95
Beta-ketoacyl synthase OS=Trichodesmium erythraeum (strain IMS101) GN=Tery_3821 PE=4 SV=1	Q10Y09	16	21	20	22	13	19
Beta-ketoacyl synthase OS=Trichodesmium erythraeum (strain IMS101) GN=Tery_3822 PE=4 SV=1	Q10Y08	2	3	5	3	2	2
Beta-lactamase OS=Trichodesmium erythraeum (strain IMS101) GN=Tery_0582 PE=4 SV=1	Q118P7	1	0	0	0	0	0
Beta-lactamase OS=Trichodesmium erythraeum (strain IMS101) GN=Tery_1472 PE=4 SV=1	Q115R2	0	0	0	0	0	0
Beta-lactamase-like OS=Trichodesmium erythraeum (strain IMS101) GN=Tery_1865 PE=4 SV=1	Q114F3	2	0	0	0	0	0
Beta-lactamase-like OS=Trichodesmium erythraeum (strain IMS101) GN=Tery_2865 PE=4 SV=1	Q110N6	0	0	0	0	0	0
Beta-lactamase-like OS=Trichodesmium erythraeum (strain IMS101) GN=Tery_3896 PE=4 SV=1	Q10XU3	0	0	0	0	0	0
Beta-lactamase-like OS=Trichodesmium erythraeum (strain IMS101) GN=Tery_4637 PE=4 SV=1	Q10VW5	0	0	0	0	0	0
Beta-N-acetylhexosaminidase OS=Trichodesmium erythraeum (strain IMS101) GN=Tery_3725 PE=4 SV=1	Q10Y93	0	3	0	0	0	2
Bifunctional protein FolD OS=Trichodesmium erythraeum (strain IMS101) GN=folD PE=3 SV=1	Q10X46	3	6	6	4	3	3
Bifunctional protein GlmU OS=Trichodesmium erythraeum (strain IMS101) GN=glmU PE=3 SV=1	Q118R6	9	6	3	4	6	4
Bifunctional protein PyrR OS=Trichodesmium erythraeum (strain IMS101) GN=pyrR PE=3 SV=1	Q114G0	3	0	3	3	0	5
Bifunctional purine biosynthesis protein PurH OS=Trichodesmium erythraeum (strain IMS101) GN=purH PE=3 SV=1	Q116T4	34	40	50	34	33	43
Bifunctional purine biosynthesis protein PurH OS=Trichodesmium erythraeum (strain IMS101) GN=purH PE=3 SV=1	REVERSE_Q116T4	0	0	0	0	0	0
Biopolymer transport protein ExbD/TolR OS=Trichodesmium erythraeum (strain IMS101) GN=Tery_4449 PE=3 SV=1	Q10WD8	1	3	2	5	3	1
Biosynthetic arginine decarboxylase OS=Trichodesmium erythraeum (strain IMS101) GN=speA PE=3 SV=1	Q116S0	0	0	0	0	0	0
Biotin carboxyl carrier protein OS=Trichodesmium erythraeum (strain IMS101) GN=Tery_1314 PE=4 SV=1	Q116D5	16	16	17	15	9	14
BolA-like protein OS=Trichodesmium erythraeum (strain IMS101) GN=Tery_0678 PE=3 SV=1	Q118F9	0	0	13	0	0	10
Branched chain amino acid aminotransferase OS=Trichodesmium erythraeum (strain IMS101) GN=Tery_0889 PE=4 SV=1	Q117N4	7	10	6	5	4	7
C-methyltransferase OS=Trichodesmium erythraeum (strain IMS101) GN=Tery_2265 PE=4 SV=1	Q112T1	21	22	24	13	15	23
C-terminal processing peptidase-2. Serine peptidase. MEROPS family S41A OS=Trichodesmium erythraeum (strain IMS101) GN=Tery_1138 PE=3 SV=1	Q116S4	12	12	10	12	7	13
C-terminal processing peptidase-2. Serine peptidase. MEROPS family S41A OS=Trichodesmium erythraeum (strain IMS101) GN=Tery_2406 PE=3 SV=1	Q112F0	6	5	4	2	5	6
C-terminal processing peptidase-2. Serine peptidase. MEROPS family S41A OS=Trichodesmium erythraeum (strain IMS101) GN=Tery_4518 PE=3 SV=1	Q10W72	17	17	19	11	11	19
Cadherin OS=Trichodesmium erythraeum (strain IMS101) GN=Tery_2591 PE=4 SV=1	Q111N6	2	0	0	0	0	0
Caffeoyl-CoA O-methyltransferase OS=Trichodesmium erythraeum (strain IMS101) GN=Tery_2976 PE=4 SV=1	Q110E0	13	15	11	10	11	17
Calcium-translocating P-type ATPase, PMCA-type OS=Trichodesmium erythraeum (strain IMS101) GN=Tery_4809 PE=4 SV=1	Q10VG7	11	9	6	6	6	13
Capsular polysaccharide biosynthesis protein-like OS=Trichodesmium erythraeum (strain IMS101) GN=Tery_3098 PE=4 SV=1	Q10ZU1	8	5	6	6	3	4
Capsular polysaccharide biosynthesis protein-like OS=Trichodesmium erythraeum (strain IMS101) GN=Tery_3136 PE=4 SV=1	REVERSE_Q10ZQ8	0	0	0	0	0	2
Carbamoyl-phosphate synthase large chain OS=Trichodesmium erythraeum (strain IMS101) GN=carB PE=3 SV=1	Q110M4	54	62	57	56	42	65
Carbamoyl-phosphate synthase large chain OS=Trichodesmium erythraeum (strain IMS101) GN=carB PE=3 SV=1	REVERSE_Q110M4	0	0	0	0	0	0
Carbamoyl-phosphate synthase small chain OS=Trichodesmium erythraeum (strain IMS101) GN=carA PE=3 SV=1	Q112P0	4	3	4	3	3	2
Carbamoyltransferase OS=Trichodesmium erythraeum (strain IMS101) GN=Tery_0792 PE=3 SV=1	Q117W3	0	0	0	0	0	1
Carbamoyltransferase OS=Trichodesmium erythraeum (strain IMS101) GN=Tery_1703 PE=4 SV=1	Q114V6	0	0	2	0	0	2
Carbohydrate-selective porin OprB OS=Trichodesmium erythraeum (strain IMS101) GN=Tery_1234 PE=3 SV=1	Q116J0	109	61	70	71	51	65
Carbohydrate-selective porin OprB OS=Trichodesmium erythraeum (strain IMS101) GN=Tery_4465 PE=3 SV=1	Q10WC2	178	182	178	172	121	169
Carbohydrate-selective porin OprB OS=Trichodesmium erythraeum (strain IMS101) GN=Tery_4466 PE=3 SV=1	Q10WC1	155	155	169	145	91	151
Carbonate dehydratase OS=Trichodesmium erythraeum (strain IMS101) GN=Tery_3849 PE=4 SV=1	Q10XY3	129	140	140	123	81	130
Carboxymethylenebutenolidase OS=Trichodesmium erythraeum (strain IMS101) GN=Tery_0392 PE=4 SV=1	Q119G4	10	10	9	10	7	12
Carboxymethylenebutenolidase OS=Trichodesmium erythraeum (strain IMS101) GN=Tery_2503 PE=4 SV=1	Q111W4	6	6	7	5	5	5
Carboxymuconolactone decarboxylase OS=Trichodesmium erythraeum (strain IMS101) GN=Tery_5022 PE=4 SV=1	Q10UZ0	7	7	9	3	8	7
Carboxypeptidase Taq. Metallo peptidase. MEROPS family M32 OS=Trichodesmium erythraeum (strain IMS101) GN=Tery_3995 PE=4 SV=1	Q10XK6	1	0	0	0	0	0
Carotenoid oxygenase OS=Trichodesmium erythraeum (strain IMS101) GN=Tery_3212 PE=4 SV=1	Q10ZJ3	0	0	0	0	0	0
Carotenoid oxygenase OS=Trichodesmium erythraeum (strain IMS101) GN=Tery_3794 PE=4 SV=1	Q10Y34	0	0	0	0	0	0
Cationic trypsin OS=Bos taurus PE=1 SV=3	P00760	7	11	6	6	9	10
Cell division protein FtsZ OS=Trichodesmium erythraeum (strain IMS101) GN=ftsZ PE=3 SV=1	Q10Y59	19	21	21	17	8	26
Cell division protein SepF OS=Trichodesmium erythraeum (strain IMS101) GN=sepF PE=3 SV=1	Q10V94	0	0	3	0	0	0
Cell division topological specificity factor OS=Trichodesmium erythraeum (strain IMS101) GN=minE PE=3 SV=1	Q10Z39	0	2	2	2	0	0
Cell envelope-related transcriptional attenuator OS=Trichodesmium erythraeum (strain IMS101) GN=Tery_2604 PE=4 SV=1	Q111M5	0	0	0	0	0	0
Cell surface protein OS=Trichodesmium erythraeum (strain IMS101) GN=Tery_1874 PE=4 SV=1	Q114E4	6	4	6	6	3	6
Cell wall hydrolase/autolysin OS=Trichodesmium erythraeum (strain IMS101) GN=Tery_4034 PE=4 SV=1	Q10XH3	10	8	9	6	7	9
CHAD domain containing protein OS=Trichodesmium erythraeum (strain IMS101) GN=Tery_4897 PE=4 SV=1	Q10VA3	0	0	0	1	0	0
Chaperone DnaJ-like OS=Trichodesmium erythraeum (strain IMS101) GN=Tery_4013 PE=4 SV=1	Q10XJ1	0	0	0	0	0	0
Chaperone protein ClpB OS=Trichodesmium erythraeum (strain IMS101) GN=clpB PE=3 SV=1	Q118T1	28	25	25	23	14	26
Chaperone protein ClpB OS=Trichodesmium erythraeum (strain IMS101) GN=clpB PE=3 SV=1	Q10YU4	15	14	11	14	8	14
Chaperone protein DnaJ OS=Trichodesmium erythraeum (strain IMS101) GN=dnaJ PE=3 SV=1	Q114R3	17	18	19	9	9	18
Chaperone protein DnaK OS=Trichodesmium erythraeum (strain IMS101) GN=dnaK PE=2 SV=1	Q10XJ2	6	5	3	3	1	5
Chaperone protein DnaK OS=Trichodesmium erythraeum (strain IMS101) GN=dnaK PE=2 SV=1	Q116E2	178	176	184	176	122	187
Chaperone protein DnaK OS=Trichodesmium erythraeum (strain IMS101) GN=dnaK PE=2 SV=1	Q114R4	14	9	16	8	7	16
Chaperonin-like RbcX OS=Trichodesmium erythraeum (strain IMS101) GN=Tery_4409 PE=4 SV=1	Q10WH7	0	2	2	0	0	1
CheW protein OS=Trichodesmium erythraeum (strain IMS101) GN=Tery_3247 PE=4 SV=1	Q10ZG3	0	1	0	0	0	0
Chlorophyll synthase OS=Trichodesmium erythraeum (strain IMS101) GN=Tery_0876 PE=4 SV=1	Q117P5	0	0	0	0	0	0
Chorismate mutase AroH OS=Trichodesmium erythraeum (strain IMS101) GN=Tery_2493 PE=4 SV=1	Q111X4	2	0	0	3	0	0
Chorismate synthase OS=Trichodesmium erythraeum (strain IMS101) GN=aroC PE=3 SV=1	Q110N5	3	5	3	3	3	5
Chromophore lyase CpcS/CpeS 1 OS=Trichodesmium erythraeum (strain IMS101) GN=cpcS1 PE=3 SV=1	Q10ZK3	1	2	2	3	3	2
Chromophore lyase CpcS/CpeS 2 OS=Trichodesmium erythraeum (strain IMS101) GN=cpcS2 PE=3 SV=1	Q10XT3	2	3	3	0	2	4
Chromophore lyase CpcS/CpeS 3 OS=Trichodesmium erythraeum (strain IMS101) GN=cpcS3 PE=3 SV=1	Q10XB0	7	7	9	8	6	9
Chromophore lyase CpcS/CpeS 4 OS=Trichodesmium erythraeum (strain IMS101) GN=cpcS4 PE=3 SV=1	Q10XA5	2	0	0	0	0	0
Chromophore lyase CpcT/CpeT 2 OS=Trichodesmium erythraeum (strain IMS101) GN=cpcT2 PE=3 SV=1	Q10UX2	2	1	2	2	2	2
Chromosome segregation ATPase OS=Trichodesmium erythraeum (strain IMS101) GN=Tery_4230 PE=4 SV=1	Q10WZ3	0	1	0	0	0	0
Chromosome segregation ATPase-like protein OS=Trichodesmium erythraeum (strain IMS101) GN=Tery_0894 PE=4 SV=1	REVERSE_Q117M9	0	0	0	0	0	0
Chromosome segregation ATPase-like protein OS=Trichodesmium erythraeum (strain IMS101) GN=Tery_0894 PE=4 SV=1	Q117M9	0	0	0	0	0	0
Chromosome segregation ATPase-like protein OS=Trichodesmium erythraeum (strain IMS101) GN=Tery_1351 PE=4 SV=1	Q116B0	2	3	3	2	1	2
Chromosome segregation ATPase-like protein OS=Trichodesmium erythraeum (strain IMS101) GN=Tery_1496 PE=4 SV=1	Q115P1	6	4	6	5	1	4
Chromosome segregation ATPase-like protein OS=Trichodesmium erythraeum (strain IMS101) GN=Tery_1497 PE=4 SV=1	Q115P0	26	23	27	26	13	22
Chromosome segregation ATPase-like protein OS=Trichodesmium erythraeum (strain IMS101) GN=Tery_1497 PE=4 SV=1	REVERSE_Q115P0	0	0	0	1	0	0
CinA-like protein OS=Trichodesmium erythraeum (strain IMS101) GN=Tery_2662 PE=3 SV=1	Q111G9	4	4	5	4	3	5
Circadian clock protein KaiB OS=Trichodesmium erythraeum (strain IMS101) GN=kaiB PE=3 SV=1	Q10Y25	5	7	5	8	3	6
Circadian clock protein kinase KaiC OS=Trichodesmium erythraeum (strain IMS101) GN=kaiC PE=3 SV=1	Q10Y24	11	12	12	15	7	12
Citrate synthase OS=Trichodesmium erythraeum (strain IMS101) GN=Tery_1580 PE=3 SV=1	Q115G4	25	22	22	22	21	27
Class II aldolase/adducin-like OS=Trichodesmium erythraeum (strain IMS101) GN=Tery_4305 PE=4 SV=1	Q10WS4	2	0	0	0	3	0
Clostridial hydrophobic OS=Trichodesmium erythraeum (strain IMS101) GN=Tery_2459 PE=4 SV=1	Q112A3	16	18	15	20	12	20
Cna B-type OS=Trichodesmium erythraeum (strain IMS101) GN=Tery_3498 PE=4 SV=1	Q10YT6	159	156	165	144	131	166
CO2 hydration protein OS=Trichodesmium erythraeum (strain IMS101) GN=Tery_0347 PE=4 SV=1	Q119K6	0	0	0	0	0	2
CoA-binding OS=Trichodesmium erythraeum (strain IMS101) GN=Tery_2396 PE=4 SV=1	Q112G0	2	1	0	0	0	2
Cob(I)yrinic acid a,c-diamide adenosyltransferase OS=Trichodesmium erythraeum (strain IMS101) GN=Tery_0786 PE=4 SV=1	Q117W8	22	17	20	20	13	18
Cob(I)yrinic acid a,c-diamide adenosyltransferase OS=Trichodesmium erythraeum (strain IMS101) GN=Tery_2088 PE=4 SV=1	Q113J6	2	0	0	0	0	3
Cob(I)yrinic acid a,c-diamide adenosyltransferase OS=Trichodesmium erythraeum (strain IMS101) GN=Tery_4685 PE=4 SV=1	Q10VS5	4	3	4	3	1	3
Cobalamin synthesis protein, P47K OS=Trichodesmium erythraeum (strain IMS101) GN=Tery_0441 PE=4 SV=1	Q119C4	0	0	0	0	0	0
Cobyric acid synthase OS=Trichodesmium erythraeum (strain IMS101) GN=cobQ PE=3 SV=1	Q10XP0	0	0	0	0	0	0
Conserved TM helix OS=Trichodesmium erythraeum (strain IMS101) GN=Tery_0500 PE=4 SV=1	Q118W9	0	0	0	1	0	0
CopG-like DNA-binding OS=Trichodesmium erythraeum (strain IMS101) GN=Tery_4108 PE=4 SV=1	Q10XA8	11	8	9	7	4	10
Copper-translocating P-type ATPase OS=Trichodesmium erythraeum (strain IMS101) GN=Tery_1307 PE=3 SV=1	Q116E1	0	0	0	0	0	0
CpcD phycobilisome linker-like OS=Trichodesmium erythraeum (strain IMS101) GN=Tery_0986 PE=4 SV=1	Q117F8	20	18	22	19	6	17
Creatininase OS=Trichodesmium erythraeum (strain IMS101) GN=Tery_0217 PE=4 SV=1	Q119W8	5	5	5	7	5	6
CTP synthase OS=Trichodesmium erythraeum (strain IMS101) GN=pyrG PE=3 SV=1	Q110M9	0	0	0	0	0	0
Cupin 4 OS=Trichodesmium erythraeum (strain IMS101) GN=Tery_3032 PE=4 SV=1	Q10ZZ1	0	0	0	1	0	0
Cupin 4 OS=Trichodesmium erythraeum (strain IMS101) GN=Tery_3032 PE=4 SV=1	REVERSE_Q10ZZ1	0	0	0	0	0	0
Cupin region OS=Trichodesmium erythraeum (strain IMS101) GN=Tery_1475 PE=4 SV=1	Q115R0	0	0	0	0	0	0
Cyanophycin synthetase OS=Trichodesmium erythraeum (strain IMS101) GN=Tery_1965 PE=3 SV=1	Q113V7	65	65	68	55	49	65
Cyanophycinase OS=Trichodesmium erythraeum (strain IMS101) GN=Tery_1964 PE=3 SV=1	Q113V8	22	22	26	19	20	27
Cyclase/dehydrase OS=Trichodesmium erythraeum (strain IMS101) GN=Tery_3955 PE=4 SV=1	Q10XP2	0	0	0	0	0	0
Cyclic nucleotide-binding protein OS=Trichodesmium erythraeum (strain IMS101) GN=Tery_1037 PE=4 SV=1	Q117B5	1	2	3	1	1	3
Cyclic nucleotide-regulated ABC bacteriocin/lantibiotic exporters OS=Trichodesmium erythraeum (strain IMS101) GN=Tery_1352 PE=4 SV=1	Q116A9	4	2	3	2	1	3
Cysteine desulfurase IscS OS=Trichodesmium erythraeum (strain IMS101) GN=iscS PE=3 SV=1	Q10XG6	0	0	0	0	0	0
Cysteine desulfurase OS=Trichodesmium erythraeum (strain IMS101) GN=Tery_4358 PE=3 SV=1	Q10WM4	0	0	0	0	0	0
Cysteine synthase OS=Trichodesmium erythraeum (strain IMS101) GN=Tery_1235 PE=3 SV=1	Q116I9	58	61	58	51	51	65
Cysteine--tRNA ligase OS=Trichodesmium erythraeum (strain IMS101) GN=cysS PE=3 SV=1	Q10XJ9	14	20	16	11	15	18
Cytochrome b559 subunit alpha OS=Trichodesmium erythraeum (strain IMS101) GN=psbE PE=3 SV=1	Q10YT0	31	26	27	23	18	31
Cytochrome b6 OS=Trichodesmium erythraeum (strain IMS101) GN=petB PE=3 SV=1	Q116S5	7	9	8	5	5	7
Cytochrome b6-f complex iron-sulfur subunit OS=Trichodesmium erythraeum (strain IMS101) GN=petC PE=3 SV=1	Q114L6	14	17	21	12	11	17
Cytochrome b6-f complex subunit 4 OS=Trichodesmium erythraeum (strain IMS101) GN=petD PE=3 SV=1	Q116S6	9	7	7	7	5	11
Cytochrome c oxidase subunit 1 OS=Trichodesmium erythraeum (strain IMS101) GN=Tery_0277 PE=3 SV=1	Q119R5	3	4	6	4	5	7
Cytochrome c oxidase subunit 1 OS=Trichodesmium erythraeum (strain IMS101) GN=Tery_1778 PE=3 SV=1	Q114N7	6	3	0	0	1	3
Cytochrome c oxidase subunit 2 OS=Trichodesmium erythraeum (strain IMS101) GN=Tery_0278 PE=3 SV=1	Q119R4	0	9	8	0	6	11
Cytochrome c-550 OS=Trichodesmium erythraeum (strain IMS101) GN=psbV PE=3 SV=1	Q111E9	22	22	24	26	15	22
Cytochrome c-550-like protein OS=Trichodesmium erythraeum (strain IMS101) GN=psbV2 PE=3 SV=1	Q111E8	7	6	6	6	3	6
Cytochrome c, class I OS=Trichodesmium erythraeum (strain IMS101) GN=Tery_4618 PE=4 SV=1	Q10VY3	0	0	0	0	0	0
Cytochrome c6 OS=Trichodesmium erythraeum (strain IMS101) GN=petJ PE=3 SV=1	Q111R3	11	9	7	5	8	11
Cytochrome f OS=Trichodesmium erythraeum (strain IMS101) GN=petA PE=3 SV=1	Q114L7	19	19	23	19	16	30
D-3-phosphoglycerate dehydrogenase OS=Trichodesmium erythraeum (strain IMS101) GN=Tery_4196 PE=3 SV=1	Q10X24	70	74	71	67	47	80
D-alanine--D-alanine ligase OS=Trichodesmium erythraeum (strain IMS101) GN=ddl PE=3 SV=1	Q10X06	4	0	4	4	4	3
D-alanine--D-alanine ligase OS=Trichodesmium erythraeum (strain IMS101) GN=Tery_2970 PE=3 SV=1	Q110E6	0	0	0	0	0	0
D-aminoacyl-tRNA deacylase OS=Trichodesmium erythraeum (strain IMS101) GN=dtd3 PE=3 SV=1	Q110H0	0	0	0	0	0	1
D-fructose 1,6-bisphosphatase class 2/sedoheptulose 1,7-bisphosphatase OS=Trichodesmium erythraeum (strain IMS101) GN=Tery_0948 PE=3 SV=1	Q117I5	186	181	208	199	124	177
D-isomer specific 2-hydroxyacid dehydrogenase, NAD-binding OS=Trichodesmium erythraeum (strain IMS101) GN=Tery_0368 PE=3 SV=1	Q119I7	0	3	1	1	1	1
Daunorubicin resistance ABC transporter ATPase subunit OS=Trichodesmium erythraeum (strain IMS101) GN=Tery_4160 PE=4 SV=1	Q10X58	30	32	35	31	20	34
DEAD/DEAH box helicase-like OS=Trichodesmium erythraeum (strain IMS101) GN=Tery_3683 PE=4 SV=1	REVERSE_Q10YD0	2	0	0	0	0	0
DEAD/DEAH box helicase-like OS=Trichodesmium erythraeum (strain IMS101) GN=Tery_3683 PE=4 SV=1	Q10YD0	0	0	0	0	0	0
DEAD/DEAH box helicase-like OS=Trichodesmium erythraeum (strain IMS101) GN=Tery_3732 PE=3 SV=1	Q10Y86	17	11	14	12	8	11
DegT/DnrJ/EryC1/StrS aminotransferase OS=Trichodesmium erythraeum (strain IMS101) GN=Tery_2261 PE=3 SV=1	Q112T5	0	0	0	0	0	1
DegT/DnrJ/EryC1/StrS aminotransferase OS=Trichodesmium erythraeum (strain IMS101) GN=Tery_2694 PE=3 SV=1	Q111E1	4	0	5	1	0	4
DegT/DnrJ/EryC1/StrS aminotransferase OS=Trichodesmium erythraeum (strain IMS101) GN=Tery_4955 PE=3 SV=1	Q10V55	23	21	26	18	13	22
Delta-aminolevulinic acid dehydratase OS=Trichodesmium erythraeum (strain IMS101) GN=Tery_4608 PE=3 SV=1	Q10VZ2	18	19	24	22	15	23
Deoxyribodipyrimidine photo-lyase type I OS=Trichodesmium erythraeum (strain IMS101) GN=Tery_1113 PE=3 SV=1	Q116U8	1	5	4	2	3	4
Deoxyribodipyrimidine photo-lyase type I OS=Trichodesmium erythraeum (strain IMS101) GN=Tery_4538 PE=3 SV=1	Q10W56	3	2	2	1	2	2
Deoxyribose-phosphate aldolase OS=Trichodesmium erythraeum (strain IMS101) GN=deoC PE=3 SV=1	Q10VZ6	9	8	8	10	7	10
Deoxyuridine 5'-triphosphate nucleotidohydrolase OS=Trichodesmium erythraeum (strain IMS101) GN=dut PE=3 SV=1	Q113K0	4	3	5	0	3	4
Dephospho-CoA kinase OS=Trichodesmium erythraeum (strain IMS101) GN=coaE PE=3 SV=1	Q119J3	0	0	0	0	0	0
Diaminopimelate decarboxylase OS=Trichodesmium erythraeum (strain IMS101) GN=lysA PE=3 SV=1	Q112C4	21	23	23	26	16	22
Diaminopimelate epimerase OS=Trichodesmium erythraeum (strain IMS101) GN=dapF PE=1 SV=1	Q116P1	7	9	8	10	6	6
Dihydrolipoamide acetyltransferase component of pyruvate dehydrogenase complex OS=Trichodesmium erythraeum (strain IMS101) GN=Tery_1831 PE=3 SV=1	Q114I7	26	31	25	27	19	31
Dihydrolipoyl dehydrogenase OS=Trichodesmium erythraeum (strain IMS101) GN=Tery_3171 PE=4 SV=1	Q10ZM5	43	39	45	45	25	39
Dihydroorotase OS=Trichodesmium erythraeum (strain IMS101) GN=Tery_2177 PE=3 SV=1	Q113B6	24	29	25	24	19	24
Dihydroorotase OS=Trichodesmium erythraeum (strain IMS101) GN=Tery_2179 PE=4 SV=1	Q113B4	1	0	0	0	0	0
Dihydroorotate dehydrogenase (quinone) OS=Trichodesmium erythraeum (strain IMS101) GN=pyrD PE=3 SV=1	Q113R9	1	2	0	1	2	2
Dihydropteridine reductase OS=Trichodesmium erythraeum (strain IMS101) GN=Tery_0696 PE=4 SV=1	Q118E3	7	9	10	10	9	9
Dihydropteroate synthase OS=Trichodesmium erythraeum (strain IMS101) GN=Tery_0697 PE=4 SV=1	Q118E2	9	6	11	11	5	10
Dihydropteroate synthase OS=Trichodesmium erythraeum (strain IMS101) GN=Tery_0699 PE=4 SV=1	Q118E0	2	2	0	1	0	0
Dihydroxy-acid dehydratase OS=Trichodesmium erythraeum (strain IMS101) GN=ilvD PE=3 SV=1	Q11AD1	25	25	26	21	17	24
Dimethylaniline monooxygenase (N-oxide forming) OS=Trichodesmium erythraeum (strain IMS101) GN=Tery_3826 PE=4 SV=1	Q10Y04	41	42	48	42	30	45
DNA gyrase subunit A OS=Trichodesmium erythraeum (strain IMS101) GN=gyrA PE=3 SV=1	Q10X34	21	16	20	15	7	17
DNA gyrase subunit A OS=Trichodesmium erythraeum (strain IMS101) GN=gyrA PE=3 SV=1	REVERSE_Q10X34	0	0	0	0	0	0
DNA gyrase subunit B OS=Trichodesmium erythraeum (strain IMS101) GN=Tery_3961 PE=4 SV=1	Q10XN8	21	21	18	17	12	24
DNA helicase OS=Trichodesmium erythraeum (strain IMS101) GN=Tery_4232 PE=3 SV=1	Q10WZ1	4	2	5	4	0	1
DNA helicase OS=Trichodesmium erythraeum (strain IMS101) GN=Tery_4233 PE=3 SV=1	Q10WZ0	0	0	0	0	0	0
DNA mismatch repair protein MutS OS=Trichodesmium erythraeum (strain IMS101) GN=mutS PE=3 SV=1	Q10YG4	1	0	1	0	0	1
DNA polymerase I OS=Trichodesmium erythraeum (strain IMS101) GN=Tery_0546 PE=4 SV=1	Q118S8	1	2	1	0	0	2
DNA polymerase III subunit beta OS=Trichodesmium erythraeum (strain IMS101) GN=Tery_0008 PE=4 SV=1	Q11AE0	0	1	1	1	0	0
DNA polymerase III, alpha subunit / Intein OS=Trichodesmium erythraeum (strain IMS101) GN=Tery_1905 PE=4 SV=1	Q114B4	0	0	0	0	0	0
DNA repair protein RecN OS=Trichodesmium erythraeum (strain IMS101) GN=Tery_0644 PE=3 SV=1	Q118I9	0	0	0	0	0	0
DNA topoisomerase (ATP-hydrolyzing) OS=Trichodesmium erythraeum (strain IMS101) GN=Tery_1901 PE=3 SV=1	Q114B8	1	0	1	2	0	2
DNA topoisomerase 1 OS=Trichodesmium erythraeum (strain IMS101) GN=topA PE=3 SV=1	Q11AC4	6	4	4	7	8	7
DNA-directed DNA polymerase OS=Trichodesmium erythraeum (strain IMS101) GN=Tery_1889 PE=3 SV=1	Q114C9	0	0	0	0	0	0
DNA-directed RNA polymerase subunit alpha OS=Trichodesmium erythraeum (strain IMS101) GN=rpoA PE=3 SV=2	Q110D1	36	37	38	31	30	35
DNA-directed RNA polymerase subunit beta OS=Trichodesmium erythraeum (strain IMS101) GN=rpoB PE=3 SV=1	Q110H1	50	52	59	46	33	50
DNA-directed RNA polymerase subunit beta' OS=Trichodesmium erythraeum (strain IMS101) GN=rpoC2 PE=3 SV=1	Q110H3	51	51	48	43	29	52
DNA-directed RNA polymerase subunit gamma OS=Trichodesmium erythraeum (strain IMS101) GN=rpoC1 PE=3 SV=1	Q110H2	34	40	38	35	18	35
DNA-directed RNA polymerase subunit omega OS=Trichodesmium erythraeum (strain IMS101) GN=rpoZ PE=3 SV=1	Q10YY8	8	10	8	10	10	10
DRTGG OS=Trichodesmium erythraeum (strain IMS101) GN=Tery_2747 PE=4 SV=1	Q110Z4	16	13	16	14	10	17
DSBA oxidoreductase OS=Trichodesmium erythraeum (strain IMS101) GN=Tery_2607 PE=4 SV=1	Q111M2	9	7	8	8	6	7
DSH-like OS=Trichodesmium erythraeum (strain IMS101) GN=Tery_3461 PE=4 SV=1	Q10YX1	1	1	3	1	1	1
dTDP-4-dehydrorhamnose 3,5-epimerase OS=Trichodesmium erythraeum (strain IMS101) GN=Tery_1346 PE=4 SV=1	Q116B4	0	4	3	4	3	5
dTDP-4-dehydrorhamnose reductase OS=Trichodesmium erythraeum (strain IMS101) GN=Tery_1344 PE=4 SV=1	Q116B5	9	9	12	8	7	12
dTDP-glucose 4,6-dehydratase OS=Trichodesmium erythraeum (strain IMS101) GN=Tery_0957 PE=3 SV=1	Q117H8	5	7	6	4	6	7
Elongation factor 4 OS=Trichodesmium erythraeum (strain IMS101) GN=lepA PE=3 SV=1	Q112D2	6	6	6	6	0	6
Elongation factor G 1 OS=Trichodesmium erythraeum (strain IMS101) GN=fusA1 PE=3 SV=1	Q118Z3	30	29	25	25	20	36
Elongation factor G 2 OS=Trichodesmium erythraeum (strain IMS101) GN=fusA2 PE=3 SV=1	Q10W80	125	133	138	113	89	131
Elongation factor P OS=Trichodesmium erythraeum (strain IMS101) GN=efp PE=3 SV=1	Q116D6	17	17	19	20	8	16
Elongation factor Ts OS=Trichodesmium erythraeum (strain IMS101) GN=tsf PE=3 SV=1	Q116Q3	52	52	59	59	33	53
Elongation factor Tu OS=Trichodesmium erythraeum (strain IMS101) GN=tuf PE=3 SV=1	Q118Z2	197	208	225	230	169	208
Enolase OS=Trichodesmium erythraeum (strain IMS101) GN=eno PE=3 SV=1	Q110V4	67	68	71	59	56	74
Enoyl-[acyl-carrier-protein] reductase [NADH] OS=Trichodesmium erythraeum (strain IMS101) GN=fabI PE=3 SV=1	Q93DR0	22	19	23	20	11	23
ErfK/YbiS/YcfS/YnhG OS=Trichodesmium erythraeum (strain IMS101) GN=Tery_2124 PE=4 SV=1	Q113G5	0	0	0	0	0	0
Ethanolamine utilization protein EutN/carboxysome structural protein Ccml OS=Trichodesmium erythraeum (strain IMS101) GN=Tery_3850 PE=4 SV=1	Q10XY2	3	2	5	3	0	2
Ethyl tert-butyl ether degradation EthD OS=Trichodesmium erythraeum (strain IMS101) GN=Tery_5021 PE=4 SV=1	Q10UZ1	38	34	35	34	27	41
Exodeoxyribonuclease III OS=Trichodesmium erythraeum (strain IMS101) GN=Tery_3564 PE=4 SV=1	Q10YM6	10	10	10	7	9	11
Exoribonuclease II OS=Trichodesmium erythraeum (strain IMS101) GN=Tery_3730 PE=4 SV=1	Q10Y88	4	3	6	4	3	4
Extracellular ligand-binding receptor OS=Trichodesmium erythraeum (strain IMS101) GN=Tery_0130 PE=4 SV=1	Q11A49	25	26	23	21	20	21
Extracellular ligand-binding receptor OS=Trichodesmium erythraeum (strain IMS101) GN=Tery_0130 PE=4 SV=1	REVERSE_Q11A49	0	0	0	0	0	0
Extracellular ligand-binding receptor OS=Trichodesmium erythraeum (strain IMS101) GN=Tery_2769 PE=4 SV=1	Q110X2	0	0	0	0	0	0
Extracellular solute-binding protein, family 1 OS=Trichodesmium erythraeum (strain IMS101) GN=Tery_2804 PE=4 SV=1	Q110U4	0	0	0	1	0	0
Extracellular solute-binding protein, family 1 OS=Trichodesmium erythraeum (strain IMS101) GN=Tery_2816 PE=4 SV=1	Q110T2	4	4	6	4	4	2
Extracellular solute-binding protein, family 1 OS=Trichodesmium erythraeum (strain IMS101) GN=Tery_3377 PE=4 SV=1	Q10Z45	127	134	140	137	104	141
Extracellular solute-binding protein, family 1 OS=Trichodesmium erythraeum (strain IMS101) GN=Tery_4188 PE=4 SV=1	Q10X32	9	8	10	8	7	7
Extracellular solute-binding protein, family 3 OS=Trichodesmium erythraeum (strain IMS101) GN=Tery_1998 PE=3 SV=1	Q113S7	104	106	112	96	80	117
Extracellular solute-binding protein, family 3 OS=Trichodesmium erythraeum (strain IMS101) GN=Tery_4470 PE=4 SV=1	Q10WB7	0	0	0	0	0	0
Extracellular solute-binding protein, family 3 OS=Trichodesmium erythraeum (strain IMS101) GN=Tery_4514 PE=4 SV=1	Q10W75	7	7	6	4	5	8
Extracellular solute-binding protein, family 5 OS=Trichodesmium erythraeum (strain IMS101) GN=Tery_1920 PE=4 SV=1	Q113Z9	13	17	11	12	9	15
Extracellular solute-binding protein, family 5 OS=Trichodesmium erythraeum (strain IMS101) GN=Tery_3355 PE=4 SV=1	Q10Z67	4	3	2	3	3	2
FAD dependent oxidoreductase OS=Trichodesmium erythraeum (strain IMS101) GN=Tery_0494 PE=4 SV=1	Q118X4	0	0	0	0	0	0
FAD dependent oxidoreductase OS=Trichodesmium erythraeum (strain IMS101) GN=Tery_1793 PE=4 SV=1	Q114M2	0	0	1	0	0	0
FAD dependent oxidoreductase OS=Trichodesmium erythraeum (strain IMS101) GN=Tery_2018 PE=4 SV=1	Q113Q8	3	3	3	2	0	2
FAD dependent oxidoreductase OS=Trichodesmium erythraeum (strain IMS101) GN=Tery_2192 PE=4 SV=1	Q113A2	0	0	0	1	0	1
FAD dependent oxidoreductase OS=Trichodesmium erythraeum (strain IMS101) GN=Tery_3278 PE=4 SV=1	Q10ZD4	0	0	0	0	0	0
FAD linked oxidase-like OS=Trichodesmium erythraeum (strain IMS101) GN=Tery_3682 PE=4 SV=1	Q10YD1	0	1	0	0	0	0
FAD-dependent pyridine nucleotide-disulphide oxidoreductase OS=Trichodesmium erythraeum (strain IMS101) GN=Tery_2062 PE=4 SV=1	Q113M1	28	29	27	23	15	24
FAD-dependent pyridine nucleotide-disulphide oxidoreductase OS=Trichodesmium erythraeum (strain IMS101) GN=Tery_3661 PE=4 SV=1	Q10YF1	23	16	20	17	11	20
Farnesyl-diphosphate synthase OS=Trichodesmium erythraeum (strain IMS101) GN=Tery_4173 PE=3 SV=1	Q10X45	0	0	0	0	0	0
Fatty acid desaturase OS=Trichodesmium erythraeum (strain IMS101) GN=Tery_0142 PE=4 SV=1	Q11A37	0	0	0	0	0	0
Fe-S metabolism associated SufE OS=Trichodesmium erythraeum (strain IMS101) GN=Tery_4443 PE=4 SV=1	Q10WE4	0	0	0	0	0	2
Ferredoxin (2Fe-2S) OS=Trichodesmium erythraeum (strain IMS101) GN=Tery_0914 PE=4 SV=1	Q117L1	0	0	0	0	0	0
Ferredoxin (2Fe-2S) OS=Trichodesmium erythraeum (strain IMS101) GN=Tery_4539 PE=4 SV=1	Q10W55	0	1	0	0	0	1
Ferredoxin OS=Trichodesmium erythraeum (strain IMS101) GN=Tery_4504 PE=4 SV=1	Q10W84	3	3	0	0	0	2
Ferredoxin--NADP reductase OS=Trichodesmium erythraeum (strain IMS101) GN=Tery_3658 PE=3 SV=1	Q10YF4	72	81	77	74	50	79
Ferric uptake regulator, Fur family OS=Trichodesmium erythraeum (strain IMS101) GN=Tery_1953 PE=3 SV=1	Q113W8	0	0	0	1	0	0
Ferric uptake regulator, Fur family OS=Trichodesmium erythraeum (strain IMS101) GN=Tery_3404 PE=3 SV=1	Q10Z19	0	0	0	1	0	0
Ferritin and Dps OS=Trichodesmium erythraeum (strain IMS101) GN=dps PE=3 SV=1	Q5GMY2	7	10	6	9	4	9
Ferritin and Dps OS=Trichodesmium erythraeum (strain IMS101) GN=Tery_2787 PE=4 SV=1	Q110V6	20	22	29	18	17	20
FeS assembly ATPase SufC OS=Trichodesmium erythraeum (strain IMS101) GN=Tery_4356 PE=4 SV=1	Q10WM6	14	13	13	13	8	20
FeS assembly protein SufD OS=Trichodesmium erythraeum (strain IMS101) GN=Tery_4357 PE=4 SV=1	Q10WM5	6	6	4	4	2	5
FHA domain containing protein OS=Trichodesmium erythraeum (strain IMS101) GN=Tery_0534 PE=4 SV=1	Q118T8	0	0	1	2	0	1
FHA domain containing protein OS=Trichodesmium erythraeum (strain IMS101) GN=Tery_3335 PE=4 SV=1	Q10Z86	1	3	3	3	1	3
Fibronectin-binding A-like OS=Trichodesmium erythraeum (strain IMS101) GN=Tery_2836 PE=4 SV=1	Q110R4	0	0	1	0	0	0
Filamentous haemagglutinin family outer membrane protein OS=Trichodesmium erythraeum (strain IMS101) GN=Tery_0363 PE=4 SV=1	Q119J2	0	0	0	0	0	0
Filamentous haemagglutinin family outer membrane protein OS=Trichodesmium erythraeum (strain IMS101) GN=Tery_1975 PE=4 SV=1	Q113U8	0	0	1	0	0	0
Filamentous haemagglutinin family outer membrane protein OS=Trichodesmium erythraeum (strain IMS101) GN=Tery_3487 PE=4 SV=1	Q10YU7	3	0	4	0	0	2
Filamentous haemagglutinin family outer membrane protein OS=Trichodesmium erythraeum (strain IMS101) GN=Tery_3830 PE=4 SV=1	Q10Y01	0	0	0	0	0	0
Fimbrial assembly OS=Trichodesmium erythraeum (strain IMS101) GN=Tery_1606 PE=4 SV=1	Q115D9	0	0	0	0	0	0
Flavin reductase-like, FMN-binding OS=Trichodesmium erythraeum (strain IMS101) GN=Tery_0302 PE=4 SV=1	Q119P3	12	10	16	8	10	11
Flavin reductase-like, FMN-binding OS=Trichodesmium erythraeum (strain IMS101) GN=Tery_0770 PE=4 SV=1	Q117X8	13	7	10	8	6	9
Flavin reductase-like, FMN-binding OS=Trichodesmium erythraeum (strain IMS101) GN=Tery_1919 PE=4 SV=1	Q114A0	13	14	11	8	10	13
Flavin-containing monooxygenase FMO OS=Trichodesmium erythraeum (strain IMS101) GN=Tery_0516 PE=4 SV=1	Q118V5	0	0	1	0	2	2
Flavodoxin OS=Trichodesmium erythraeum (strain IMS101) GN=fld PE=3 SV=2	O52659	297	297	305	319	256	263
Flavodoxin OS=Trichodesmium erythraeum (strain IMS101) GN=Tery_2559 PE=3 SV=1	Q111R5	0	4	0	4	0	0
Fructose-1,6-bisphosphatase class 1 OS=Trichodesmium erythraeum (strain IMS101) GN=fbp PE=3 SV=1	Q118F5	17	18	14	14	12	21
Fructose-bisphosphate aldolase OS=Trichodesmium erythraeum (strain IMS101) GN=Tery_1687 PE=4 SV=1	Q114W6	224	247	240	251	174	237
Fructose-bisphosphate aldolase OS=Trichodesmium erythraeum (strain IMS101) GN=Tery_4099 PE=3 SV=1	Q10XB7	69	87	80	73	47	81
Fumarate hydratase class II OS=Trichodesmium erythraeum (strain IMS101) GN=fumC PE=3 SV=1	Q116C7	0	3	0	2	0	0
GAF sensor hybrid histidine kinase OS=Trichodesmium erythraeum (strain IMS101) GN=Tery_1418 PE=4 SV=1	Q115W0	0	0	0	0	0	0
GAF sensor signal transduction histidine kinase OS=Trichodesmium erythraeum (strain IMS101) GN=Tery_3575 PE=4 SV=1	Q10YL5	7	6	8	8	5	5
Gamma-glutamyl phosphate reductase OS=Trichodesmium erythraeum (strain IMS101) GN=proA PE=3 SV=1	Q112S1	14	12	13	11	10	15
Gamma-glutamyltransferase 2. Threonine peptidase. MEROPS family T03 OS=Trichodesmium erythraeum (strain IMS101) GN=Tery_2633 PE=4 SV=1	Q111J6	0	0	0	0	0	0
Gas vesicle G OS=Trichodesmium erythraeum (strain IMS101) GN=Tery_2338 PE=4 SV=1	Q112L6	0	0	0	0	0	0
Gas vesicle K OS=Trichodesmium erythraeum (strain IMS101) GN=Tery_2332 PE=4 SV=1	Q112M0	1	0	0	1	0	1
Gas vesicle structural protein OS=Trichodesmium erythraeum (strain IMS101) GN=Tery_2330 PE=3 SV=1	Q112M2	3	4	4	4	2	0
Gas vesicle synthesis GvpLGvpF OS=Trichodesmium erythraeum (strain IMS101) GN=Tery_2339 PE=4 SV=1	Q112L5	37	38	42	39	31	35
GatB/Yqey OS=Trichodesmium erythraeum (strain IMS101) GN=Tery_0596 PE=4 SV=1	Q118N4	11	8	11	10	4	9
GCN5-related N-acetyltransferase OS=Trichodesmium erythraeum (strain IMS101) GN=Tery_0901 PE=4 SV=1	Q117M2	0	0	0	0	0	0
GCN5-related N-acetyltransferase OS=Trichodesmium erythraeum (strain IMS101) GN=Tery_1638 PE=4 SV=1	Q115B2	1	0	0	0	0	0
GCN5-related N-acetyltransferase OS=Trichodesmium erythraeum (strain IMS101) GN=Tery_3397 PE=4 SV=1	Q10Z26	6	4	10	5	4	7
GCN5-related N-acetyltransferase OS=Trichodesmium erythraeum (strain IMS101) GN=Tery_4425 PE=4 SV=1	Q10WG1	6	4	4	5	2	3
GDP-L-fucose synthase OS=Trichodesmium erythraeum (strain IMS101) GN=fcl PE=3 SV=1	Q118X7	9	15	13	15	9	10
GDP-mannose 4,6-dehydratase OS=Trichodesmium erythraeum (strain IMS101) GN=gmd PE=3 SV=1	Q110G5	0	2	2	1	0	1
GDP-mannose 4,6-dehydratase OS=Trichodesmium erythraeum (strain IMS101) GN=gmd PE=3 SV=1	Q118X8	24	17	23	17	17	24
Geranylgeranyl reductase OS=Trichodesmium erythraeum (strain IMS101) GN=Tery_1823 PE=4 SV=1	Q114J4	7	6	4	5	4	9
Geranylgeranyl reductase OS=Trichodesmium erythraeum (strain IMS101) GN=Tery_3777 PE=4 SV=1	Q10Y50	11	11	10	12	9	13
Glucokinase OS=Trichodesmium erythraeum (strain IMS101) GN=Tery_0774 PE=3 SV=1	Q117X6	16	19	21	15	12	24
Glucose sorbosone dehydrogenase OS=Trichodesmium erythraeum (strain IMS101) GN=Tery_4458 PE=4 SV=1	Q10WC9	0	0	0	0	0	0
Glucose-1-phosphate adenylyltransferase OS=Trichodesmium erythraeum (strain IMS101) GN=Tery_4395 PE=3 SV=1	Q10WJ1	84	86	92	84	60	90
Glucose-1-phosphate cytidylyltransferase OS=Trichodesmium erythraeum (strain IMS101) GN=Tery_2260 PE=4 SV=1	Q112T6	0	0	0	0	0	0
Glucose-1-phosphate thymidyltransferase OS=Trichodesmium erythraeum (strain IMS101) GN=Tery_1537 PE=4 SV=1	Q115K6	9	7	10	13	3	7
Glucose-6-phosphate 1-dehydrogenase OS=Trichodesmium erythraeum (strain IMS101) GN=zwf PE=3 SV=1	Q118F3	122	126	124	109	72	124
Glucose-methanol-choline oxidoreductase OS=Trichodesmium erythraeum (strain IMS101) GN=Tery_0275 PE=4 SV=1	Q119R7	48	55	52	35	33	56
Glutamate 5-kinase OS=Trichodesmium erythraeum (strain IMS101) GN=proB PE=3 SV=1	Q114A6	0	0	0	0	0	0
Glutamate dehydrogenase 1, mitochondrial OS=Bos taurus GN=GLUD1 PE=1 SV=2	REVERSE_P00366	0	0	0	1	0	1
Glutamate dehydrogenase OS=Trichodesmium erythraeum (strain IMS101) GN=Tery_4311 PE=3 SV=1	Q10WR8	20	21	22	20	19	23
Glutamate racemase OS=Trichodesmium erythraeum (strain IMS101) GN=murI PE=3 SV=1	Q11A19	2	0	2	2	0	2
Glutamate synthase (Ferredoxin) OS=Trichodesmium erythraeum (strain IMS101) GN=Tery_0466 PE=4 SV=1	Q119A1	26	18	24	21	15	31
Glutamate--tRNA ligase OS=Trichodesmium erythraeum (strain IMS101) GN=gltX PE=3 SV=1	Q119Z5	12	14	18	10	9	13
Glutamate-1-semialdehyde 2,1-aminomutase OS=Trichodesmium erythraeum (strain IMS101) GN=hemL PE=3 SV=1	Q110Z9	54	54	55	54	35	53
Glutamine--fructose-6-phosphate aminotransferase [isomerizing] OS=Trichodesmium erythraeum (strain IMS101) GN=glmS PE=3 SV=1	Q119B0	0	0	0	0	0	0
Glutamyl-tRNA reductase OS=Trichodesmium erythraeum (strain IMS101) GN=hemA PE=3 SV=1	Q117I4	0	0	1	0	1	2
Glutamyl-tRNA(Gln) amidotransferase subunit A OS=Trichodesmium erythraeum (strain IMS101) GN=gatA PE=3 SV=1	Q113L8	39	39	39	37	32	42
Glutaredoxin 2 OS=Trichodesmium erythraeum (strain IMS101) GN=Tery_4152 PE=4 SV=1	Q10X65	0	0	1	0	0	0
Glutaredoxin 3 OS=Trichodesmium erythraeum (strain IMS101) GN=Tery_4078 PE=4 SV=1	Q10XD7	3	4	4	6	4	4
Glutaredoxin OS=Trichodesmium erythraeum (strain IMS101) GN=Tery_0356 PE=4 SV=1	Q119J9	2	0	1	4	0	1
Glutaredoxin OS=Trichodesmium erythraeum (strain IMS101) GN=Tery_0677 PE=3 SV=1	Q118G0	2	3	3	3	2	3
Glutathione S-transferase-like OS=Trichodesmium erythraeum (strain IMS101) GN=Tery_2440 PE=4 SV=1	Q112B9	19	17	21	21	16	18
Glutathione S-transferase-like OS=Trichodesmium erythraeum (strain IMS101) GN=Tery_2440 PE=4 SV=1	REVERSE_Q112B9	0	0	0	0	0	0
Glutathione S-transferase-like OS=Trichodesmium erythraeum (strain IMS101) GN=Tery_2639 PE=4 SV=1	Q111J0	0	0	0	0	0	0
Glutathione S-transferase-like OS=Trichodesmium erythraeum (strain IMS101) GN=Tery_4017 PE=4 SV=1	Q10XI9	48	47	48	51	34	44
Glutathione S-transferase-like OS=Trichodesmium erythraeum (strain IMS101) GN=Tery_4511 PE=4 SV=1	Q10W78	68	72	68	64	44	74
Glutathione synthetase OS=Trichodesmium erythraeum (strain IMS101) GN=gshB PE=3 SV=1	Q10X16	17	17	17	21	13	22
Glyceraldehyde-3-phosphate dehydrogenase OS=Trichodesmium erythraeum (strain IMS101) GN=Tery_2881 PE=3 SV=1	Q110M1	28	30	28	31	18	31
Glyceraldehyde-3-phosphate dehydrogenase OS=Trichodesmium erythraeum (strain IMS101) GN=Tery_3274 PE=3 SV=1	Q10ZD8	5	5	6	4	5	6
Glyceraldehyde-3-phosphate dehydrogenase OS=Trichodesmium erythraeum (strain IMS101) GN=Tery_4030 PE=3 SV=1	Q10XH6	80	92	88	86	59	88
Glycerol kinase OS=Trichodesmium erythraeum (strain IMS101) GN=glpK PE=3 SV=1	Q10Y19	4	2	4	3	2	5
Glycerophosphoryl diester phosphodiesterase OS=Trichodesmium erythraeum (strain IMS101) GN=Tery_2777 PE=4 SV=1	Q110W5	18	21	21	21	16	23
Glycine amidinotransferase OS=Trichodesmium erythraeum (strain IMS101) GN=Tery_3130 PE=4 SV=1	Q10ZR4	9	7	10	6	8	6
Glycine betaine/L-proline ABC transporter, ATPase subunit OS=Trichodesmium erythraeum (strain IMS101) GN=Tery_4109 PE=4 SV=1	Q10XA7	14	16	16	16	12	19
Glycine betaine/L-proline ABC transporter, ATPase subunit OS=Trichodesmium erythraeum (strain IMS101) GN=Tery_4109 PE=4 SV=1	REVERSE_Q10XA7	0	0	0	0	0	0
Glycine cleavage system H protein OS=Trichodesmium erythraeum (strain IMS101) GN=gcvH PE=3 SV=1	Q10UY0	19	21	23	21	17	23
Glycine cleavage T protein (Aminomethyl transferase) OS=Trichodesmium erythraeum (strain IMS101) GN=Tery_4696 PE=3 SV=1	Q10VR5	3	0	0	2	0	0
Glycine dehydrogenase (decarboxylating) OS=Trichodesmium erythraeum (strain IMS101) GN=gcvP PE=3 SV=1	Q10UY1	4	5	4	2	2	3
Glycine--tRNA ligase alpha subunit OS=Trichodesmium erythraeum (strain IMS101) GN=glyQ PE=3 SV=1	Q10XW9	1	0	0	0	0	1
Glycine--tRNA ligase beta subunit OS=Trichodesmium erythraeum (strain IMS101) GN=glyS PE=3 SV=1	Q10WA6	19	18	23	14	14	17
Glycogen debranching enzyme GlgX OS=Trichodesmium erythraeum (strain IMS101) GN=Tery_1895 PE=3 SV=1	Q114C4	2	2	0	1	3	2
Glycogen debranching enzyme GlgX OS=Trichodesmium erythraeum (strain IMS101) GN=Tery_3430 PE=3 SV=1	Q10Z01	3	1	3	0	2	3
Glycogen debranching enzyme GlgX OS=Trichodesmium erythraeum (strain IMS101) GN=Tery_5016 PE=3 SV=1	Q10UZ6	16	16	16	13	8	18
Glycogen debranching enzyme, putative OS=Trichodesmium erythraeum (strain IMS101) GN=Tery_2589 PE=4 SV=1	Q111N8	17	18	19	17	12	20
Glycogen synthase OS=Trichodesmium erythraeum (strain IMS101) GN=glgA PE=3 SV=1	Q113E3	44	47	49	41	26	39
Glycogen synthase OS=Trichodesmium erythraeum (strain IMS101) GN=glgA PE=3 SV=1	REVERSE_Q113E3	0	0	0	0	0	0
Glycoside hydrolase, family 57 OS=Trichodesmium erythraeum (strain IMS101) GN=Tery_0045 PE=3 SV=1	Q11AB3	6	6	10	5	6	4
Glycoside hydrolase, family 57 OS=Trichodesmium erythraeum (strain IMS101) GN=Tery_2345 PE=3 SV=1	Q112K9	0	2	4	1	4	2
Glycosyl transferase, family 2 OS=Trichodesmium erythraeum (strain IMS101) GN=Tery_1340 PE=4 SV=1	Q116B9	0	0	0	0	0	0
Glycosyl transferase, family 2 OS=Trichodesmium erythraeum (strain IMS101) GN=Tery_1492 PE=4 SV=1	Q115P5	7	5	9	4	7	9
Glycosyl transferase, family 2 OS=Trichodesmium erythraeum (strain IMS101) GN=Tery_2268 PE=4 SV=1	Q112S8	0	0	0	0	0	0
Glycosyl transferase, family 2 OS=Trichodesmium erythraeum (strain IMS101) GN=Tery_2707 PE=4 SV=1	Q111C8	45	49	38	43	22	41
Glycosyl transferase, family 2 OS=Trichodesmium erythraeum (strain IMS101) GN=Tery_2707 PE=4 SV=1	REVERSE_Q111C8	0	0	0	0	0	0
Glycosyl transferase, family 2 OS=Trichodesmium erythraeum (strain IMS101) GN=Tery_2749 PE=4 SV=1	Q110Z2	0	0	0	0	0	0
Glycosyl transferase, family 2 OS=Trichodesmium erythraeum (strain IMS101) GN=Tery_3238 PE=4 SV=1	Q10ZH1	1	3	1	0	1	2
Glycosyl transferase, family 2 OS=Trichodesmium erythraeum (strain IMS101) GN=Tery_3371 PE=4 SV=1	Q10Z51	3	1	1	3	1	0
Glycosyl transferase, family 2 OS=Trichodesmium erythraeum (strain IMS101) GN=Tery_3434 PE=4 SV=1	Q10YZ7	12	9	11	10	7	9
Glycosyl transferase, family 2 OS=Trichodesmium erythraeum (strain IMS101) GN=Tery_4954 PE=4 SV=1	Q10V56	0	0	0	0	0	0
Glycosyl transferase, family 9 OS=Trichodesmium erythraeum (strain IMS101) GN=Tery_0610 PE=4 SV=1	Q118M0	24	20	26	22	13	24
Glycosyl transferase, group 1 OS=Trichodesmium erythraeum (strain IMS101) GN=Tery_0146 PE=4 SV=1	Q11A33	1	1	0	0	1	1
Glycosyl transferase, group 1 OS=Trichodesmium erythraeum (strain IMS101) GN=Tery_1099 PE=4 SV=1	Q116W0	3	2	5	5	0	1
Glycosyl transferase, group 1 OS=Trichodesmium erythraeum (strain IMS101) GN=Tery_1135 PE=4 SV=1	Q116S7	0	2	1	0	2	2
Glycosyl transferase, group 1 OS=Trichodesmium erythraeum (strain IMS101) GN=Tery_1356 PE=4 SV=1	Q116A5	7	5	7	5	6	7
Glycosyl transferase, group 1 OS=Trichodesmium erythraeum (strain IMS101) GN=Tery_1737 PE=4 SV=1	Q114S6	0	0	0	0	0	0
Glycosyl transferase, group 1 OS=Trichodesmium erythraeum (strain IMS101) GN=Tery_2067 PE=4 SV=1	Q113L6	0	0	0	0	0	0
Glycosyl transferase, group 1 OS=Trichodesmium erythraeum (strain IMS101) GN=Tery_2168 PE=4 SV=1	Q113C3	12	10	14	10	6	12
Glycosyl transferase, group 1 OS=Trichodesmium erythraeum (strain IMS101) GN=Tery_2524 PE=4 SV=1	Q111U5	9	9	10	8	6	7
Glycosyl transferase, group 1 OS=Trichodesmium erythraeum (strain IMS101) GN=Tery_3818 PE=4 SV=1	Q10Y12	4	3	3	1	2	5
Glycosyl transferase, group 1 OS=Trichodesmium erythraeum (strain IMS101) GN=Tery_4043 PE=4 SV=1	Q10XG7	1	0	1	0	0	0
Glycosyl transferase, group 1 OS=Trichodesmium erythraeum (strain IMS101) GN=Tery_4124 PE=4 SV=1	REVERSE_Q10X92	0	0	0	1	0	0
Glycosyltransferase-like OS=Trichodesmium erythraeum (strain IMS101) GN=Tery_0631 PE=4 SV=1	Q118K1	0	2	0	0	0	0
Glyoxalase/bleomycin resistance protein/dioxygenase OS=Trichodesmium erythraeum (strain IMS101) GN=Tery_0420 PE=4 SV=1	Q119E2	12	12	10	13	10	10
GMP synthase [glutamine-hydrolyzing] OS=Trichodesmium erythraeum (strain IMS101) GN=guaA PE=3 SV=1	Q117L8	1	2	1	1	0	3
GTP cyclohydrolase 1 OS=Trichodesmium erythraeum (strain IMS101) GN=folE PE=3 SV=1	Q117H2	0	0	0	0	0	3
GTP cyclohydrolase 1 OS=Trichodesmium erythraeum (strain IMS101) GN=folE PE=3 SV=1	Q10VY5	11	9	10	9	6	10
GTP-binding protein TypA OS=Trichodesmium erythraeum (strain IMS101) GN=Tery_4442 PE=4 SV=1	Q10WE5	36	33	36	26	21	34
GTP-binding protein, HSR1-related OS=Trichodesmium erythraeum (strain IMS101) GN=Tery_1653 PE=4 SV=1	REVERSE_Q114Z8	0	0	0	0	0	0
GTPase Der OS=Trichodesmium erythraeum (strain IMS101) GN=der PE=3 SV=1	Q119L7	3	3	2	2	3	3
GTPase Der OS=Trichodesmium erythraeum (strain IMS101) GN=der PE=3 SV=1	REVERSE_Q119L7	0	1	0	0	0	0
GTPase Era OS=Trichodesmium erythraeum (strain IMS101) GN=era PE=3 SV=1	Q110F4	0	0	0	0	0	0
GTPase Obg OS=Trichodesmium erythraeum (strain IMS101) GN=obg PE=3 SV=1	Q10XA1	0	4	0	4	0	5
GUN4-like OS=Trichodesmium erythraeum (strain IMS101) GN=Tery_0174 PE=4 SV=1	Q11A08	8	6	5	4	2	5
GUN4-like OS=Trichodesmium erythraeum (strain IMS101) GN=Tery_3036 PE=4 SV=1	REVERSE_Q10ZY7	0	0	0	0	0	0
GUN4-like OS=Trichodesmium erythraeum (strain IMS101) GN=Tery_3350 PE=4 SV=1	Q10Z72	1	0	0	0	0	0
HAD superfamily (Subfamily IA) hydrolase, TIGR01548 OS=Trichodesmium erythraeum (strain IMS101) GN=Tery_3452 PE=4 SV=1	Q10YY0	3	3	2	0	0	3
HAD-superfamily hydrolase, subfamily IA, variant 3 OS=Trichodesmium erythraeum (strain IMS101) GN=Tery_0409 PE=4 SV=1	Q119F1	10	11	8	8	8	9
HAD-superfamily hydrolase, subfamily IA, variant 3 OS=Trichodesmium erythraeum (strain IMS101) GN=Tery_0680 PE=4 SV=1	Q118F7	0	3	1	0	2	0
HAD-superfamily hydrolase, subfamily IA, variant 3 OS=Trichodesmium erythraeum (strain IMS101) GN=Tery_1995 PE=4 SV=1	Q113S9	0	0	0	0	0	0
HAD-superfamily hydrolase, subfamily IA, variant 3 OS=Trichodesmium erythraeum (strain IMS101) GN=Tery_2465 PE=4 SV=1	Q111Z8	0	0	0	0	0	0
HAD-superfamily hydrolase, subfamily IA, variant 3 OS=Trichodesmium erythraeum (strain IMS101) GN=Tery_4648 PE=4 SV=1	Q10VV6	2	1	1	1	0	3
HAD-superfamily hydrolase, subfamily IIB OS=Trichodesmium erythraeum (strain IMS101) GN=Tery_3874 PE=4 SV=1	Q10XW2	0	0	0	0	0	0
Haloacid dehalogenase-like hydrolase OS=Trichodesmium erythraeum (strain IMS101) GN=Tery_2614 PE=4 SV=1	Q111L5	0	0	3	0	0	0
HEAT domain containing protein OS=Trichodesmium erythraeum (strain IMS101) GN=Tery_0057 PE=4 SV=1	REVERSE_Q11AA4	0	0	0	0	0	0
HEAT domain containing protein OS=Trichodesmium erythraeum (strain IMS101) GN=Tery_0826 PE=4 SV=1	Q117T4	1	0	0	0	0	0
HEAT domain containing protein OS=Trichodesmium erythraeum (strain IMS101) GN=Tery_4484 PE=4 SV=1	Q10WA4	0	1	2	0	0	1
Heat shock protein 70 OS=Trichodesmium erythraeum (strain IMS101) GN=Tery_0893 PE=3 SV=1	Q117N0	2	1	1	0	0	0
Heat shock protein DnaJ-like OS=Trichodesmium erythraeum (strain IMS101) GN=Tery_0757 PE=4 SV=1	Q117Y9	0	0	2	1	0	2
Heat shock protein DnaJ-like OS=Trichodesmium erythraeum (strain IMS101) GN=Tery_4397 PE=4 SV=1	Q10WI9	2	2	2	1	1	1
Heat shock protein DnaJ-like OS=Trichodesmium erythraeum (strain IMS101) GN=Tery_5067 PE=4 SV=1	Q10UV3	3	0	1	4	0	3
Heavy metal translocating P-type ATPase OS=Trichodesmium erythraeum (strain IMS101) GN=Tery_1562 PE=3 SV=1	Q115I2	2	2	1	2	0	2
Heavy metal transport/detoxification protein OS=Trichodesmium erythraeum (strain IMS101) GN=Tery_4881 PE=4 SV=1	Q10VB4	6	6	9	6	5	8
Helicase-like OS=Trichodesmium erythraeum (strain IMS101) GN=Tery_0012 PE=4 SV=1	REVERSE_Q11AD7	1	0	0	0	0	0
Heme utilization protein HuvX OS=Trichodesmium erythraeum (strain IMS101) GN=Tery_2539 PE=4 SV=1	Q111T3	8	8	8	9	7	6
Hemolysin-type calcium-binding region OS=Trichodesmium erythraeum (strain IMS101) GN=Tery_0405 PE=4 SV=1	Q119F4	3	0	2	1	4	3
Hemolysin-type calcium-binding region OS=Trichodesmium erythraeum (strain IMS101) GN=Tery_1355 PE=4 SV=1	Q116A6	63	70	69	74	44	69
Hemolysin-type calcium-binding region OS=Trichodesmium erythraeum (strain IMS101) GN=Tery_1450 PE=4 SV=1	Q115T4	32	31	32	33	22	29
Hemolysin-type calcium-binding region OS=Trichodesmium erythraeum (strain IMS101) GN=Tery_2055 PE=4 SV=1	Q113M8	30	33	29	24	20	35
Hemolysin-type calcium-binding region OS=Trichodesmium erythraeum (strain IMS101) GN=Tery_2710 PE=4 SV=1	Q111C6	18	14	16	14	15	17
Hemolysin-type calcium-binding region OS=Trichodesmium erythraeum (strain IMS101) GN=Tery_3467 PE=4 SV=1	Q10YW6	75	82	78	77	56	74
Hemolysin-type calcium-binding region OS=Trichodesmium erythraeum (strain IMS101) GN=Tery_3470 PE=4 SV=1	Q10YW4	14	16	15	14	9	14
Hemolysin-type calcium-binding region OS=Trichodesmium erythraeum (strain IMS101) GN=Tery_3664 PE=4 SV=1	Q10YE8	0	0	0	0	0	0
Hemolysin-type calcium-binding region OS=Trichodesmium erythraeum (strain IMS101) GN=Tery_4191 PE=4 SV=1	Q10X29	0	0	0	0	0	2
HesB OS=Trichodesmium erythraeum (strain IMS101) GN=hesB PE=3 SV=1	Q9KJL2	8	9	8	9	5	9
Heterocyst differentiation control protein OS=Trichodesmium erythraeum (strain IMS101) GN=hetR PE=3 SV=2	Q93CE9	0	0	0	0	0	0
Heterocyst differentiation protein OS=Trichodesmium erythraeum (strain IMS101) GN=Tery_4218 PE=4 SV=1	Q10X05	0	0	0	1	0	0
HI0933-like protein OS=Trichodesmium erythraeum (strain IMS101) GN=Tery_4574 PE=4 SV=1	Q10W24	0	1	1	1	0	2
Histidine biosynthesis bifunctional protein HisIE OS=Trichodesmium erythraeum (strain IMS101) GN=hisI PE=3 SV=1	Q111A0	4	5	4	4	4	5
Histidine kinase OS=Trichodesmium erythraeum (strain IMS101) GN=Tery_0943 PE=4 SV=1	Q117I8	0	0	0	0	0	0
Histidine kinase OS=Trichodesmium erythraeum (strain IMS101) GN=Tery_1644 PE=4 SV=1	Q115A6	0	2	0	0	1	3
Histidine kinase OS=Trichodesmium erythraeum (strain IMS101) GN=Tery_2729 PE=4 SV=1	Q111B1	0	0	0	0	0	0
Histidine kinase OS=Trichodesmium erythraeum (strain IMS101) GN=Tery_3912 PE=4 SV=1	Q10XT0	0	0	0	0	0	0
Histidine triad (HIT) protein OS=Trichodesmium erythraeum (strain IMS101) GN=Tery_4113 PE=4 SV=1	REVERSE_Q10XA3	0	0	0	0	0	0
Histidine triad (HIT) protein OS=Trichodesmium erythraeum (strain IMS101) GN=Tery_4764 PE=4 SV=1	Q10VK6	3	5	8	4	3	4
Histidine--tRNA ligase OS=Trichodesmium erythraeum (strain IMS101) GN=hisS PE=3 SV=1	Q117Y8	36	36	36	36	30	40
Histidine--tRNA ligase OS=Trichodesmium erythraeum (strain IMS101) GN=hisS PE=3 SV=1	Q118Q2	5	4	8	5	6	8
Histidinol dehydrogenase OS=Trichodesmium erythraeum (strain IMS101) GN=hisD PE=3 SV=1	Q110G8	0	2	2	1	3	3
Histidinol-phosphate aminotransferase OS=Trichodesmium erythraeum (strain IMS101) GN=hisC PE=3 SV=1	Q10VS0	3	0	4	3	2	0
Holliday junction ATP-dependent DNA helicase RuvB OS=Trichodesmium erythraeum (strain IMS101) GN=ruvB PE=3 SV=1	Q115Z7	0	0	0	0	0	0
Homoaconitate hydratase family protein OS=Trichodesmium erythraeum (strain IMS101) GN=Tery_2728 PE=4 SV=1	Q111B2	2	1	1	1	0	0
Homoserine dehydrogenase OS=Trichodesmium erythraeum (strain IMS101) GN=Tery_4567 PE=3 SV=1	Q10W31	19	21	19	15	16	26
Homoserine kinase OS=Trichodesmium erythraeum (strain IMS101) GN=thrB PE=3 SV=1	Q117D0	4	0	5	4	0	0
HpcH/HpaI aldolase OS=Trichodesmium erythraeum (strain IMS101) GN=Tery_2821 PE=3 SV=1	Q110S7	3	4	3	2	3	6
Hydrogen:quinone oxidoreductase OS=Trichodesmium erythraeum (strain IMS101) GN=Tery_3368 PE=4 SV=1	Q10Z54	0	1	0	0	0	0
Hydrogenase accessory protein HypB OS=Trichodesmium erythraeum (strain IMS101) GN=Tery_0802 PE=4 SV=1	Q117V5	1	0	0	1	0	1
Hydrogenase expression/formation protein HypE OS=Trichodesmium erythraeum (strain IMS101) GN=Tery_0797 PE=4 SV=1	Q117W0	3	2	4	3	0	7
Hydrogenase maturation protease OS=Trichodesmium erythraeum (strain IMS101) GN=Tery_3367 PE=4 SV=1	Q10Z55	0	0	0	0	0	0
Hydrogenobyrinic acid a,c-diamide cobaltochelatase OS=Trichodesmium erythraeum (strain IMS101) GN=Tery_0866 PE=4 SV=1	REVERSE_Q117Q2	0	0	0	0	0	0
Hydrogenobyrinic acid a,c-diamide cobaltochelatase OS=Trichodesmium erythraeum (strain IMS101) GN=Tery_3224 PE=4 SV=1	Q10ZI2	0	0	0	0	0	0
Hydroxyneurosporene-O-methyltransferase OS=Trichodesmium erythraeum (strain IMS101) GN=Tery_2966 PE=4 SV=1	Q110F0	9	8	10	9	7	9
Imidazole glycerol phosphate synthase subunit HisH OS=Trichodesmium erythraeum (strain IMS101) GN=hisH PE=3 SV=1	Q113E7	1	2	0	0	1	1
IMP dehydrogenase OS=Trichodesmium erythraeum (strain IMS101) GN=Tery_3304 PE=4 SV=1	Q10ZB4	9	10	11	10	5	10
IMP dehydrogenase subunit OS=Trichodesmium erythraeum (strain IMS101) GN=Tery_3306 PE=4 SV=1	Q10ZB2	17	15	12	15	11	16
Indole-3-glycerol phosphate synthase OS=Trichodesmium erythraeum (strain IMS101) GN=trpC PE=3 SV=1	Q10ZM7	2	0	2	0	0	0
Inorganic pyrophosphatase OS=Trichodesmium erythraeum (strain IMS101) GN=ppa PE=3 SV=1	Q115M1	38	42	38	39	29	39
Inosine/uridine-preferring nucleoside hydrolase OS=Trichodesmium erythraeum (strain IMS101) GN=Tery_3465 PE=4 SV=1	Q10YW8	6	4	6	4	4	6
Inositol monophosphatase OS=Trichodesmium erythraeum (strain IMS101) GN=Tery_4756 PE=4 SV=1	Q10VL4	4	4	4	2	2	4
Inositol-1(Or 4)-monophosphatase OS=Trichodesmium erythraeum (strain IMS101) GN=Tery_0756 PE=4 SV=1	Q117Z0	12	10	10	8	6	10
Integrin, beta chain-like OS=Trichodesmium erythraeum (strain IMS101) GN=Tery_1890 PE=4 SV=1	Q114C8	12	10	11	8	3	9
Iron-regulated ABC transporter membrane component SufB OS=Trichodesmium erythraeum (strain IMS101) GN=Tery_4355 PE=4 SV=1	Q10WM7	9	10	12	8	12	11
Iron-sulfur cluster assembly accessory protein OS=Trichodesmium erythraeum (strain IMS101) GN=Tery_3951 PE=3 SV=1	Q10XP5	6	7	5	3	0	7
Isocitrate dehydrogenase [NADP] OS=Trichodesmium erythraeum (strain IMS101) GN=Tery_0071 PE=4 SV=1	Q11A94	28	23	34	26	20	31
Isoleucine--tRNA ligase OS=Trichodesmium erythraeum (strain IMS101) GN=ileS PE=3 SV=1	Q10YK7	17	20	19	18	9	21
Isoleucine--tRNA ligase OS=Trichodesmium erythraeum (strain IMS101) GN=ileS PE=3 SV=1	REVERSE_Q10YK7	0	0	0	1	0	0
Isopentenyl-diphosphate delta-isomerase OS=Trichodesmium erythraeum (strain IMS101) GN=fni PE=3 SV=1	Q115F6	0	0	0	0	0	0
KaiA OS=Trichodesmium erythraeum (strain IMS101) GN=Tery_3803 PE=4 SV=1	Q10Y26	0	0	0	0	0	0
Keratin, type I cuticular Ha4 OS=Homo sapiens GN=KRT34 PE=2 SV=2	O76011	0	0	0	0	0	0
Keratin, type I cuticular Ha5 OS=Homo sapiens GN=KRT35 PE=2 SV=5	Q92764	0	0	0	0	0	0
Keratin, type I cuticular Ha6 OS=Homo sapiens GN=KRT36 PE=1 SV=1	O76013	0	0	0	0	0	0
Keratin, type I cytoskeletal 15 OS=Ovis aries GN=KRT15 PE=2 SV=1	O77727	0	0	0	0	0	0
Keratin, type I cytoskeletal 9 OS=Homo sapiens GN=KRT9 PE=1 SV=3	P35527	16	24	18	5	7	29
Keratin, type I cytoskeletal 9 OS=Homo sapiens GN=KRT9 PE=1 SV=3	REVERSE_P35527	0	0	0	0	0	0
Keratin, type II cuticular Hb4 OS=Homo sapiens GN=KRT84 PE=2 SV=2	Q9NSB2	1	1	0	0	0	0
Keratin, type II cytoskeletal 2 epidermal OS=Homo sapiens GN=KRT2 PE=1 SV=2	P35908	13	16	15	3	3	22
Ketol-acid reductoisomerase (NADP(+)) OS=Trichodesmium erythraeum (strain IMS101) GN=ilvC PE=3 SV=1	Q10WP7	75	77	85	78	55	82
KpsF/GutQ family protein OS=Trichodesmium erythraeum (strain IMS101) GN=Tery_3105 PE=3 SV=1	Q10ZT6	6	5	6	6	3	5
KWG Leptospira OS=Trichodesmium erythraeum (strain IMS101) GN=Tery_2057 PE=4 SV=1	Q113M6	6	4	5	3	2	7
L-glutamine synthetase OS=Trichodesmium erythraeum (strain IMS101) GN=Tery_4681 PE=3 SV=1	Q10VS8	6	4	4	5	2	1
L-proline dehydrogenase / delta-1-pyrroline-5-carboxylate dehydrogenase OS=Trichodesmium erythraeum (strain IMS101) GN=Tery_3446 PE=3 SV=1	REVERSE_Q10YY5	3	1	0	0	1	1
L-proline dehydrogenase / delta-1-pyrroline-5-carboxylate dehydrogenase OS=Trichodesmium erythraeum (strain IMS101) GN=Tery_3446 PE=3 SV=1	Q10YY5	5	9	7	3	7	7
L-threonine aldolase OS=Trichodesmium erythraeum (strain IMS101) GN=Tery_1646 PE=3 SV=1	Q115A4	0	0	0	0	0	0
Laccase domain protein OS=Trichodesmium erythraeum (strain IMS101) GN=Tery_3353 PE=3 SV=1	Q10Z69	0	0	0	0	0	0
Leucine--tRNA ligase OS=Trichodesmium erythraeum (strain IMS101) GN=leuS PE=3 SV=1	Q114V5	11	7	9	11	8	12
Light-independent protochlorophyllide reductase iron-sulfur ATP-binding protein OS=Trichodesmium erythraeum (strain IMS101) GN=chlL PE=3 SV=1	Q115L1	0	0	0	0	0	0
Light-independent protochlorophyllide reductase subunit B OS=Trichodesmium erythraeum (strain IMS101) GN=chlB PE=3 SV=1	Q10Y17	0	0	0	0	0	0
Light-independent protochlorophyllide reductase subunit N OS=Trichodesmium erythraeum (strain IMS101) GN=chlN PE=3 SV=1	Q115L3	1	0	2	1	2	0
Lipase OS=Trichodesmium erythraeum (strain IMS101) GN=Tery_3878 PE=4 SV=1	Q10XV8	34	40	40	37	29	41
Lipase, class 3 OS=Trichodesmium erythraeum (strain IMS101) GN=Tery_1685 PE=4 SV=1	Q114W8	18	18	19	18	19	18
Lipoate-protein ligase OS=Trichodesmium erythraeum (strain IMS101) GN=Tery_2331 PE=4 SV=1	Q112M1	17	16	16	14	8	14
Lipolytic enzyme, G-D-S-L OS=Trichodesmium erythraeum (strain IMS101) GN=Tery_3229 PE=4 SV=1	Q10ZH8	2	0	0	2	1	0
LL-diaminopimelate aminotransferase OS=Trichodesmium erythraeum (strain IMS101) GN=dapL PE=3 SV=1	Q10ZC3	60	59	74	58	50	65
LSU ribosomal protein L25P OS=Trichodesmium erythraeum (strain IMS101) GN=Tery_3283 PE=3 SV=1	Q10ZC9	13	12	14	12	11	15
Lysine--tRNA ligase OS=Trichodesmium erythraeum (strain IMS101) GN=lysS PE=3 SV=1	Q112I8	20	20	20	17	11	23
Lysozyme C OS=Homo sapiens GN=LYZ PE=1 SV=1	P61626	0	0	0	0	0	0
Lysozyme OS=Trichodesmium erythraeum (strain IMS101) GN=Tery_4178 PE=3 SV=1	Q10X40	6	6	5	3	2	2
Lysozyme OS=Trichodesmium erythraeum (strain IMS101) GN=Tery_4180 PE=3 SV=1	Q10X39	39	41	44	34	26	47
Lysozyme OS=Trichodesmium erythraeum (strain IMS101) GN=Tery_4180 PE=3 SV=1	REVERSE_Q10X39	0	0	0	0	0	0
Lytic transglycosylase, catalytic OS=Trichodesmium erythraeum (strain IMS101) GN=Tery_2092 PE=4 SV=1	REVERSE_Q113J3	0	0	0	0	0	0
Lytic transglycosylase, catalytic OS=Trichodesmium erythraeum (strain IMS101) GN=Tery_2092 PE=4 SV=1	Q113J3	0	0	0	0	0	0
Macrophage migration inhibitory factor OS=Trichodesmium erythraeum (strain IMS101) GN=Tery_1915 PE=4 SV=1	Q114A4	3	5	3	0	3	3
Maf-like protein Tery_0163 OS=Trichodesmium erythraeum (strain IMS101) GN=Tery_0163 PE=3 SV=1	Q11A17	6	7	6	6	5	6
Magnesium protoporphyrin O-methyltransferase OS=Trichodesmium erythraeum (strain IMS101) GN=Tery_4469 PE=4 SV=1	Q10WB8	17	16	15	13	10	20
Magnesium-protoporphyrin IX monomethyl ester [oxidative] cyclase OS=Trichodesmium erythraeum (strain IMS101) GN=acsF PE=3 SV=1	Q118B4	0	0	0	0	0	0
Malate dehydrogenase (Oxaloacetate decarboxylating) OS=Trichodesmium erythraeum (strain IMS101) GN=Tery_3983 PE=4 SV=1	Q10XL6	22	28	27	26	20	27
Male sterility-like OS=Trichodesmium erythraeum (strain IMS101) GN=Tery_4583 PE=4 SV=1	Q10W15	0	0	0	0	0	0
Mannose-1-phosphate guanylyltransferase (GDP) OS=Trichodesmium erythraeum (strain IMS101) GN=Tery_1856 PE=4 SV=1	Q114G2	0	0	3	0	3	3
Mannose-6-phosphate isomerase OS=Trichodesmium erythraeum (strain IMS101) GN=Tery_0471 PE=4 SV=1	Q118Z7	0	0	0	1	0	0
McrBC 5-methylcytosine restriction system component-like OS=Trichodesmium erythraeum (strain IMS101) GN=Tery_3582 PE=4 SV=1	Q10YL1	0	0	0	0	0	0
Metallophosphoesterase OS=Trichodesmium erythraeum (strain IMS101) GN=Tery_0082 PE=4 SV=1	Q11A84	3	2	2	1	0	3
Methionine aminopeptidase OS=Trichodesmium erythraeum (strain IMS101) GN=map PE=3 SV=1	Q119F6	6	6	5	8	9	7
Methionine synthase (B12-dependent) OS=Trichodesmium erythraeum (strain IMS101) GN=Tery_1073 PE=4 SV=1	Q116Y2	8	8	8	9	5	7
Methionine synthase (B12-dependent) OS=Trichodesmium erythraeum (strain IMS101) GN=Tery_2492 PE=4 SV=1	REVERSE_Q111X5	0	0	0	0	0	1
Methionine synthase (B12-dependent) OS=Trichodesmium erythraeum (strain IMS101) GN=Tery_2492 PE=4 SV=1	Q111X5	0	0	0	0	0	0
Methionine--tRNA ligase OS=Trichodesmium erythraeum (strain IMS101) GN=metG PE=3 SV=1	Q114L1	10	6	9	10	8	11
Methionyl-tRNA formyltransferase OS=Trichodesmium erythraeum (strain IMS101) GN=fmt PE=3 SV=1	Q114P5	6	3	8	5	2	5
Methyl-accepting chemotaxis sensory transducer OS=Trichodesmium erythraeum (strain IMS101) GN=Tery_3246 PE=4 SV=1	Q10ZG4	0	0	0	0	0	0
Methyl-accepting chemotaxis sensory transducer OS=Trichodesmium erythraeum (strain IMS101) GN=Tery_3246 PE=4 SV=1	REVERSE_Q10ZG4	0	0	0	0	0	0
Methyl-accepting chemotaxis sensory transducer OS=Trichodesmium erythraeum (strain IMS101) GN=Tery_4229 PE=4 SV=1	Q10WZ4	26	26	24	23	17	27
Methyl-accepting chemotaxis sensory transducer with GAF sensor OS=Trichodesmium erythraeum (strain IMS101) GN=Tery_0715 PE=4 SV=1	REVERSE_Q118C6	5	0	0	0	0	1
Methyl-accepting chemotaxis sensory transducer with GAF sensor OS=Trichodesmium erythraeum (strain IMS101) GN=Tery_0715 PE=4 SV=1	Q118C6	28	13	23	17	15	26
Methylenetetrahydrofolate reductase OS=Trichodesmium erythraeum (strain IMS101) GN=Tery_4692 PE=3 SV=1	Q10VR8	10	9	6	5	4	7
Methylthioribose-1-phosphate isomerase OS=Trichodesmium erythraeum (strain IMS101) GN=mtnA PE=3 SV=1	Q113K5	0	0	0	0	0	0
Methyltransferase FkbM family OS=Trichodesmium erythraeum (strain IMS101) GN=Tery_1251 PE=4 SV=1	Q116H8	28	25	26	29	17	24
Methyltransferase FkbM family OS=Trichodesmium erythraeum (strain IMS101) GN=Tery_1754 PE=4 SV=1	Q114R0	0	0	0	0	0	0
Methyltransferase FkbM family OS=Trichodesmium erythraeum (strain IMS101) GN=Tery_2169 PE=4 SV=1	Q113C2	0	0	1	0	0	0
Methyltransferase FkbM family OS=Trichodesmium erythraeum (strain IMS101) GN=Tery_2946 PE=4 SV=1	Q110G4	2	3	3	2	2	2
Methyltransferase type 11 OS=Trichodesmium erythraeum (strain IMS101) GN=Tery_0686 PE=4 SV=1	Q118F1	0	0	0	0	0	0
Methyltransferase type 11 OS=Trichodesmium erythraeum (strain IMS101) GN=Tery_1067 PE=4 SV=1	Q116Y8	0	0	1	1	0	0
Methyltransferase type 11 OS=Trichodesmium erythraeum (strain IMS101) GN=Tery_1357 PE=4 SV=1	Q116A4	7	6	6	3	3	6
Methyltransferase type 11 OS=Trichodesmium erythraeum (strain IMS101) GN=Tery_1361 PE=4 SV=1	Q116A1	1	0	0	0	0	0
Methyltransferase type 11 OS=Trichodesmium erythraeum (strain IMS101) GN=Tery_1479 PE=4 SV=1	Q115Q6	10	9	18	16	6	16
Methyltransferase type 11 OS=Trichodesmium erythraeum (strain IMS101) GN=Tery_1991 PE=4 SV=1	Q113T2	1	4	2	2	1	0
Methyltransferase type 11 OS=Trichodesmium erythraeum (strain IMS101) GN=Tery_2053 PE=4 SV=1	Q113N0	0	0	0	0	0	0
Methyltransferase type 11 OS=Trichodesmium erythraeum (strain IMS101) GN=Tery_2150 PE=4 SV=1	Q113E0	0	0	0	0	0	0
Methyltransferase type 11 OS=Trichodesmium erythraeum (strain IMS101) GN=Tery_2173 PE=3 SV=1	Q113B9	20	23	18	15	15	20
Methyltransferase type 11 OS=Trichodesmium erythraeum (strain IMS101) GN=Tery_2390 PE=4 SV=1	Q112G6	23	19	26	20	16	18
Methyltransferase type 11 OS=Trichodesmium erythraeum (strain IMS101) GN=Tery_2956 PE=4 SV=1	Q110F7	0	0	0	0	0	0
Methyltransferase type 11 OS=Trichodesmium erythraeum (strain IMS101) GN=Tery_3190 PE=4 SV=1	Q10ZL0	0	0	0	0	0	0
Methyltransferase type 11 OS=Trichodesmium erythraeum (strain IMS101) GN=Tery_3753 PE=4 SV=1	Q10Y69	9	9	6	8	6	7
Methyltransferase type 11 OS=Trichodesmium erythraeum (strain IMS101) GN=Tery_3833 PE=4 SV=1	Q10XZ8	0	0	0	0	0	0
Methyltransferase type 11 OS=Trichodesmium erythraeum (strain IMS101) GN=Tery_3884 PE=3 SV=1	Q10XV3	0	2	0	0	2	3
Methyltransferase type 11 OS=Trichodesmium erythraeum (strain IMS101) GN=Tery_4388 PE=4 SV=1	Q10WJ7	18	16	15	13	12	19
Methyltransferase type 11 OS=Trichodesmium erythraeum (strain IMS101) GN=Tery_4441 PE=4 SV=1	Q10WE6	5	7	6	6	5	8
Methyltransferase type 12 OS=Trichodesmium erythraeum (strain IMS101) GN=Tery_1776 PE=4 SV=1	Q114N9	15	13	13	7	8	15
Methyltransferase type 12 OS=Trichodesmium erythraeum (strain IMS101) GN=Tery_2156 PE=4 SV=1	Q113D4	4	3	6	6	4	4
Methyltransferase type 12 OS=Trichodesmium erythraeum (strain IMS101) GN=Tery_3813 PE=4 SV=1	Q10Y16	0	2	0	3	2	1
Mg chelatase, subunit ChlI OS=Trichodesmium erythraeum (strain IMS101) GN=Tery_4765 PE=4 SV=1	Q10VK5	2	1	1	1	0	0
Mg-protoporphyrin IX chelatase OS=Trichodesmium erythraeum (strain IMS101) GN=Tery_3622 PE=3 SV=1	Q10YI2	11	14	13	11	11	11
Mg-protoporphyrin IX chelatase OS=Trichodesmium erythraeum (strain IMS101) GN=Tery_4967 PE=3 SV=1	Q10V43	0	0	0	0	0	0
Microcompartments protein OS=Trichodesmium erythraeum (strain IMS101) GN=Tery_3396 PE=4 SV=1	Q10Z27	3	2	3	2	1	4
Microcompartments protein OS=Trichodesmium erythraeum (strain IMS101) GN=Tery_3846 PE=4 SV=1	Q10XY6	0	0	0	0	0	0
Microcompartments protein OS=Trichodesmium erythraeum (strain IMS101) GN=Tery_3851 PE=4 SV=1	Q10XY1	22	25	27	27	17	25
Microcompartments protein OS=Trichodesmium erythraeum (strain IMS101) GN=Tery_3852 PE=4 SV=1	Q10XY0	113	94	108	98	66	84
Microcompartments protein OS=Trichodesmium erythraeum (strain IMS101) GN=Tery_4328 PE=4 SV=1	Q10WQ3	0	0	0	0	0	0
Microcompartments protein OS=Trichodesmium erythraeum (strain IMS101) GN=Tery_4329 PE=4 SV=1	Q10WQ2	20	21	23	18	16	26
Mo-dependent nitrogenase-like OS=Trichodesmium erythraeum (strain IMS101) GN=Tery_4114 PE=4 SV=1	Q10XA2	17	18	15	11	12	20
MoaD family protein OS=Trichodesmium erythraeum (strain IMS101) GN=Tery_4349 PE=4 SV=1	Q10WN3	33	30	34	32	21	27
MoFe protein of nitrogenase beta subunit OS=Trichodesmium erythraeum (strain IMS101) GN=nifK PE=3 SV=1	O84930	176	204	205	201	156	200
Molybdenum cofactor biosynthesis protein B OS=Trichodesmium erythraeum (strain IMS101) GN=Tery_2407 PE=3 SV=1	Q112E9	5	5	9	5	0	7
Molybdopterin molybdochelatase OS=Trichodesmium erythraeum (strain IMS101) GN=Tery_0767 PE=4 SV=1	REVERSE_Q117Y0	3	4	2	2	3	1
Molybdopterin molybdochelatase OS=Trichodesmium erythraeum (strain IMS101) GN=Tery_0767 PE=4 SV=1	Q117Y0	10	9	8	5	8	11
Monooxygenase, FAD-binding OS=Trichodesmium erythraeum (strain IMS101) GN=Tery_2172 PE=4 SV=1	Q113C0	1	0	1	0	1	1
Monooxygenase, FAD-binding OS=Trichodesmium erythraeum (strain IMS101) GN=Tery_4265 PE=4 SV=1	Q10WW2	0	0	0	0	0	2
MORN motif containing protein OS=Trichodesmium erythraeum (strain IMS101) GN=Tery_1013 PE=4 SV=1	Q117D4	0	0	0	0	0	0
MotA/TolQ/ExbB proton channel OS=Trichodesmium erythraeum (strain IMS101) GN=Tery_1868 PE=3 SV=1	REVERSE_Q114F0	0	0	0	0	0	0
MotA/TolQ/ExbB proton channel OS=Trichodesmium erythraeum (strain IMS101) GN=Tery_4448 PE=3 SV=1	Q10WD9	6	5	6	4	3	6
mRNA interferase OS=Trichodesmium erythraeum (strain IMS101) GN=Tery_0630 PE=3 SV=1	Q118K2	7	7	9	9	5	6
MscS Mechanosensitive ion channel OS=Trichodesmium erythraeum (strain IMS101) GN=Tery_0209 PE=4 SV=1	REVERSE_Q119X6	2	0	0	5	0	0
MscS Mechanosensitive ion channel OS=Trichodesmium erythraeum (strain IMS101) GN=Tery_1065 PE=4 SV=1	Q116Z0	0	0	0	0	0	0
MscS Mechanosensitive ion channel OS=Trichodesmium erythraeum (strain IMS101) GN=Tery_4456 PE=4 SV=1	Q10WD1	1	0	1	0	1	1
MscS Mechanosensitive ion channel OS=Trichodesmium erythraeum (strain IMS101) GN=Tery_4761 PE=4 SV=1	Q10VK9	31	32	32	26	20	32
Multi-sensor hybrid histidine kinase OS=Trichodesmium erythraeum (strain IMS101) GN=Tery_4447 PE=4 SV=1	Q10WE0	0	0	0	0	0	0
Multi-sensor signal transduction histidine kinase OS=Trichodesmium erythraeum (strain IMS101) GN=Tery_4749 PE=4 SV=1	Q10VL9	0	0	0	0	0	0
Multicopper oxidase, type 2 OS=Trichodesmium erythraeum (strain IMS101) GN=Tery_5023 PE=4 SV=1	Q10UY9	42	42	47	35	27	39
N utilization substance protein B homolog OS=Trichodesmium erythraeum (strain IMS101) GN=nusB PE=3 SV=1	Q118A6	5	4	6	4	3	7
N-(5'-phosphoribosyl)anthranilate isomerase OS=Trichodesmium erythraeum (strain IMS101) GN=trpF PE=3 SV=1	Q10XS2	0	0	0	0	0	0
N-acetyl-gamma-glutamyl-phosphate reductase OS=Trichodesmium erythraeum (strain IMS101) GN=argC PE=3 SV=1	Q110V5	21	22	21	18	18	24
N-acetylglucosamine-6-phosphate deacetylase OS=Trichodesmium erythraeum (strain IMS101) GN=Tery_4474 PE=3 SV=1	Q10WB3	0	0	0	0	0	0
N-acetylmuramic acid 6-phosphate etherase OS=Trichodesmium erythraeum (strain IMS101) GN=murQ PE=3 SV=1	Q119L1	0	0	0	0	0	0
N-acetylmuramoyl-L-alanine amidase OS=Trichodesmium erythraeum (strain IMS101) GN=Tery_0339 PE=4 SV=1	Q119L2	0	0	0	1	0	0
N-acylglucosamine-6-phosphate 2-epimerase OS=Trichodesmium erythraeum (strain IMS101) GN=Tery_1417 PE=3 SV=1	Q115W1	0	0	0	0	0	1
N5-carboxyaminoimidazole ribonucleotide mutase OS=Trichodesmium erythraeum (strain IMS101) GN=purE PE=3 SV=1	Q10WB1	0	0	0	0	0	0
Na-Ca exchanger/integrin-beta4 OS=Trichodesmium erythraeum (strain IMS101) GN=Tery_0100 PE=4 SV=1	Q11A72	2	2	0	0	0	4
Na-Ca exchanger/integrin-beta4 OS=Trichodesmium erythraeum (strain IMS101) GN=Tery_0599 PE=4 SV=1	Q118N1	5	6	8	5	4	9
Na-Ca exchanger/integrin-beta4 OS=Trichodesmium erythraeum (strain IMS101) GN=Tery_0666 PE=4 SV=1	Q118G9	30	27	24	27	21	30
Na-Ca exchanger/integrin-beta4 OS=Trichodesmium erythraeum (strain IMS101) GN=Tery_1772 PE=4 SV=1	Q114P2	16	11	15	15	8	17
Na-Ca exchanger/integrin-beta4 OS=Trichodesmium erythraeum (strain IMS101) GN=Tery_1773 PE=4 SV=1	Q114P1	7	7	6	3	4	8
Na-Ca exchanger/integrin-beta4 OS=Trichodesmium erythraeum (strain IMS101) GN=Tery_1906 PE=4 SV=1	Q114B3	16	16	12	12	12	15
Na-Ca exchanger/integrin-beta4 OS=Trichodesmium erythraeum (strain IMS101) GN=Tery_3408 PE=4 SV=1	Q10Z15	24	26	28	25	18	29
Na-Ca exchanger/integrin-beta4 OS=Trichodesmium erythraeum (strain IMS101) GN=Tery_3936 PE=4 SV=1	Q10XQ7	0	0	0	0	0	0
Na-Ca exchanger/integrin-beta4 OS=Trichodesmium erythraeum (strain IMS101) GN=Tery_4754 PE=4 SV=1	Q10VL5	6	8	7	4	3	6
Na+/solute symporter OS=Trichodesmium erythraeum (strain IMS101) GN=Tery_1324 PE=3 SV=1	Q116C9	0	1	1	0	0	2
NAD kinase OS=Trichodesmium erythraeum (strain IMS101) GN=nadK PE=3 SV=1	Q114P4	0	0	0	0	0	0
NAD-dependent epimerase/dehydratase OS=Trichodesmium erythraeum (strain IMS101) GN=Tery_2262 PE=4 SV=1	Q112T4	2	5	5	3	2	4
NAD-dependent epimerase/dehydratase OS=Trichodesmium erythraeum (strain IMS101) GN=Tery_2514 PE=4 SV=1	Q111V4	13	17	14	11	12	14
NAD-dependent epimerase/dehydratase OS=Trichodesmium erythraeum (strain IMS101) GN=Tery_4630 PE=4 SV=1	REVERSE_Q10VX2	2	0	0	0	0	0
NAD-dependent epimerase/dehydratase OS=Trichodesmium erythraeum (strain IMS101) GN=Tery_4630 PE=4 SV=1	Q10VX2	25	24	25	21	16	31
NAD-dependent epimerase/dehydratase OS=Trichodesmium erythraeum (strain IMS101) GN=Tery_4900 PE=4 SV=1	Q10VA0	5	7	9	5	9	8
NAD(P) transhydrogenase subunit beta OS=Trichodesmium erythraeum (strain IMS101) GN=Tery_4703 PE=3 SV=1	Q10VQ8	2	0	2	1	0	0
NAD(P)(+) transhydrogenase (AB-specific) OS=Trichodesmium erythraeum (strain IMS101) GN=Tery_4705 PE=4 SV=1	Q10VQ6	16	12	15	12	8	11
NAD(P)H-quinone oxidoreductase chain 4 1 OS=Trichodesmium erythraeum (strain IMS101) GN=ndhD1 PE=3 SV=1	Q118H6	3	0	5	4	0	0
NAD(P)H-quinone oxidoreductase chain 4 2 OS=Trichodesmium erythraeum (strain IMS101) GN=ndhD2 PE=3 SV=1	Q10ZG8	1	0	1	0	0	1
NAD(P)H-quinone oxidoreductase subunit 1 OS=Trichodesmium erythraeum (strain IMS101) GN=ndhA PE=3 SV=1	Q115G5	5	3	5	1	3	2
NAD(P)H-quinone oxidoreductase subunit H OS=Trichodesmium erythraeum (strain IMS101) GN=ndhH PE=3 SV=1	Q10VG2	17	19	17	14	11	20
NAD(P)H-quinone oxidoreductase subunit I OS=Trichodesmium erythraeum (strain IMS101) GN=ndhI PE=3 SV=1	Q115G6	3	5	4	3	2	3
NAD(P)H-quinone oxidoreductase subunit J OS=Trichodesmium erythraeum (strain IMS101) GN=ndhJ PE=3 SV=1	Q10YT5	7	8	8	10	5	7
NAD(P)H-quinone oxidoreductase subunit K OS=Trichodesmium erythraeum (strain IMS101) GN=ndhK PE=3 SV=1	Q10YT4	21	19	23	22	12	17
NAD(P)H-quinone oxidoreductase subunit M OS=Trichodesmium erythraeum (strain IMS101) GN=ndhM PE=3 SV=1	Q110L9	9	10	9	6	5	7
NAD(P)H-quinone oxidoreductase subunit N OS=Trichodesmium erythraeum (strain IMS101) GN=ndhN PE=3 SV=1	Q110A6	5	7	6	6	5	10
NAD(P)H-quinone oxidoreductase subunit O OS=Trichodesmium erythraeum (strain IMS101) GN=ndhO PE=3 SV=1	Q117D1	4	7	8	5	5	7
NADH ubiquinone oxidoreductase, 20 kDa subunit OS=Trichodesmium erythraeum (strain IMS101) GN=Tery_3369 PE=4 SV=1	Q10Z53	4	5	4	5	4	5
NADH-ubiquinone/plastoquinone oxidoreductase, chain 6 OS=Trichodesmium erythraeum (strain IMS101) GN=Tery_1577 PE=3 SV=1	Q115G7	3	1	2	2	0	3
NADH:flavin oxidoreductase/NADH oxidase OS=Trichodesmium erythraeum (strain IMS101) GN=Tery_3133 PE=4 SV=1	Q10ZR1	0	1	0	0	0	0
NADPH-dependent FMN reductase OS=Trichodesmium erythraeum (strain IMS101) GN=Tery_3252 PE=4 SV=1	Q10ZF8	1	0	0	0	0	0
NADPH-glutathione reductase OS=Trichodesmium erythraeum (strain IMS101) GN=Tery_4747 PE=3 SV=1	Q10VM1	58	62	65	59	43	64
NADPH-protochlorophyllide oxidoreductase / chlorophyll synthase OS=Trichodesmium erythraeum (strain IMS101) GN=Tery_0109 PE=4 SV=1	Q11A66	4	5	6	8	2	5
NH(3)-dependent NAD(+) synthetase OS=Trichodesmium erythraeum (strain IMS101) GN=Tery_1984 PE=3 SV=1	Q113T9	1	1	0	2	1	0
Nicotinate-nucleotide pyrophosphorylase (Carboxylating) OS=Trichodesmium erythraeum (strain IMS101) GN=Tery_4352 PE=3 SV=1	Q10WN0	0	0	0	0	0	0
NifEN OS=Trichodesmium erythraeum (strain IMS101) GN=nifEN PE=3 SV=1	Q9KJL7	21	23	16	15	13	28
NifT/FixU OS=Trichodesmium erythraeum (strain IMS101) GN=Tery_4128 PE=4 SV=1	Q10X88	34	35	38	31	23	35
NifX OS=Trichodesmium erythraeum (strain IMS101) GN=nifX PE=4 SV=1	Q9KJL6	8	8	8	4	8	8
NifZ OS=Trichodesmium erythraeum (strain IMS101) GN=Tery_4129 PE=4 SV=1	Q10X87	4	2	4	5	3	5
Nitrilase/cyanide hydratase and apolipoprotein N-acyltransferase OS=Trichodesmium erythraeum (strain IMS101) GN=Tery_1632 PE=4 SV=1	Q115B6	12	10	12	8	8	9
Nitrogen regulatory protein P-II OS=Trichodesmium erythraeum (strain IMS101) GN=Tery_2842 PE=3 SV=1	Q110Q8	78	71	69	69	42	65
Nitrogenase iron protein OS=Trichodesmium erythraeum (strain IMS101) GN=nifH PE=3 SV=1	O34106	154	175	169	155	108	189
Nitrogenase protein alpha chain OS=Trichodesmium erythraeum (strain IMS101) GN=nifD PE=3 SV=1	O84929	113	110	109	113	74	108
Nitrogenase-associated protein OS=Trichodesmium erythraeum (strain IMS101) GN=Tery_3773 PE=3 SV=1	Q10Y53	2	3	2	2	2	3
Nitrogenase-stabilizing/protective protein NifW OS=Trichodesmium erythraeum (strain IMS101) GN=nifW PE=3 SV=1	Q9KJL4	30	26	26	31	15	27
Nitroreductase OS=Trichodesmium erythraeum (strain IMS101) GN=Tery_2657 PE=4 SV=1	Q111H3	140	131	143	144	106	142
Nitroreductase OS=Trichodesmium erythraeum (strain IMS101) GN=Tery_3562 PE=4 SV=1	Q10YM8	12	14	14	13	14	12
NmrA-like OS=Trichodesmium erythraeum (strain IMS101) GN=Tery_1003 PE=4 SV=1	Q117E3	2	6	5	6	3	3
NmrA-like OS=Trichodesmium erythraeum (strain IMS101) GN=Tery_3162 PE=4 SV=1	Q10ZN4	17	10	18	18	12	17
NmrA-like OS=Trichodesmium erythraeum (strain IMS101) GN=Tery_3563 PE=4 SV=1	Q10YM7	19	17	16	16	11	24
Non-canonical purine NTP pyrophosphatase OS=Trichodesmium erythraeum (strain IMS101) GN=Tery_1005 PE=3 SV=1	Q117E1	2	1	0	0	1	0
Nuclease (SNase-like) OS=Trichodesmium erythraeum (strain IMS101) GN=Tery_0407 PE=4 SV=1	Q119F2	0	0	0	0	0	1
Nuclease (SNase-like) OS=Trichodesmium erythraeum (strain IMS101) GN=Tery_0881 PE=4 SV=1	Q117P1	19	19	20	18	13	15
Nuclease (SNase-like) OS=Trichodesmium erythraeum (strain IMS101) GN=Tery_2046 PE=4 SV=1	Q113N7	5	5	6	4	2	3
Nucleoid-associated protein Tery_4027 OS=Trichodesmium erythraeum (strain IMS101) GN=Tery_4027 PE=3 SV=1	Q10XH9	112	118	111	112	86	125
Nucleoside diphosphate kinase OS=Trichodesmium erythraeum (strain IMS101) GN=ndk PE=3 SV=1	Q116S1	63	61	57	73	45	59
Nucleotidyl transferase OS=Trichodesmium erythraeum (strain IMS101) GN=Tery_1143 PE=4 SV=1	Q116R9	2	2	3	3	1	3
Nucleotidyl transferase OS=Trichodesmium erythraeum (strain IMS101) GN=Tery_3188 PE=4 SV=1	Q10ZL2	0	0	0	0	0	0
NUDIX hydrolase OS=Trichodesmium erythraeum (strain IMS101) GN=Tery_1124 PE=4 SV=1	Q116T8	0	6	6	0	5	6
NUDIX hydrolase OS=Trichodesmium erythraeum (strain IMS101) GN=Tery_1319 PE=3 SV=1	Q116D2	0	7	3	4	2	5
O-antigen polymerase OS=Trichodesmium erythraeum (strain IMS101) GN=Tery_3696 PE=4 SV=1	Q10YB8	0	0	0	0	0	0
O-methyltransferase, family 2 OS=Trichodesmium erythraeum (strain IMS101) GN=Tery_3121 PE=4 SV=1	Q10ZS1	33	31	27	32	24	32
O-methyltransferase, family 3 OS=Trichodesmium erythraeum (strain IMS101) GN=Tery_3263 PE=4 SV=1	Q10ZE9	0	3	4	2	2	4
Oligopeptidase A. Metallo peptidase. MEROPS family M03A OS=Trichodesmium erythraeum (strain IMS101) GN=Tery_4649 PE=3 SV=1	Q10VV5	16	19	20	23	9	17
OmpA/MotB OS=Trichodesmium erythraeum (strain IMS101) GN=Tery_3734 PE=3 SV=1	Q10Y84	31	27	29	25	16	27
OpcA protein OS=Trichodesmium erythraeum (strain IMS101) GN=Tery_0685 PE=4 SV=1	Q118F2	66	74	78	72	45	77
OpcA protein OS=Trichodesmium erythraeum (strain IMS101) GN=Tery_4316 PE=4 SV=1	Q10WR3	0	0	0	0	0	0
ORF2 OS=Trichodesmium erythraeum (strain IMS101) GN=Tery_4141 PE=4 SV=1	Q9KJL5	15	19	17	15	12	17
Ornithine carbamoyltransferase OS=Trichodesmium erythraeum (strain IMS101) GN=Tery_1323 PE=3 SV=1	Q116D0	24	20	23	24	14	18
Orotate phosphoribosyltransferase OS=Trichodesmium erythraeum (strain IMS101) GN=pyrE PE=3 SV=1	REVERSE_Q119I0	0	0	0	0	0	0
Orotate phosphoribosyltransferase OS=Trichodesmium erythraeum (strain IMS101) GN=pyrE PE=3 SV=1	Q112A1	0	0	0	0	0	0
Orotidine 5'-phosphate decarboxylase OS=Trichodesmium erythraeum (strain IMS101) GN=pyrF PE=3 SV=1	Q119B9	0	0	0	0	1	1
OstA-like protein OS=Trichodesmium erythraeum (strain IMS101) GN=Tery_2273 PE=4 SV=1	Q112S3	0	2	0	1	0	0
Outer membrane efflux protein OS=Trichodesmium erythraeum (strain IMS101) GN=Tery_4505 PE=4 SV=1	Q10W83	0	1	0	0	0	2
Ovalbumin OS=Gallus gallus GN=SERPINB14 PE=1 SV=2	P01012	0	0	0	0	0	0
Oxidoreductase alpha (Molybdopterin) subunit OS=Trichodesmium erythraeum (strain IMS101) GN=Tery_0404 PE=3 SV=1	Q119F5	1	0	6	5	0	0
Oxidoreductase-like OS=Trichodesmium erythraeum (strain IMS101) GN=Tery_0913 PE=4 SV=1	Q117L2	2	2	3	3	0	1
Oxidoreductase-like OS=Trichodesmium erythraeum (strain IMS101) GN=Tery_4205 PE=4 SV=1	Q10X17	15	16	19	16	11	17
Oxidoreductase-like OS=Trichodesmium erythraeum (strain IMS101) GN=Tery_4981 PE=4 SV=1	Q10V29	21	18	20	19	13	18
Oxidoreductase, molybdopterin binding OS=Trichodesmium erythraeum (strain IMS101) GN=Tery_0060 PE=4 SV=1	Q11AA1	2	2	4	0	0	2
Oxidoreductase, molybdopterin binding OS=Trichodesmium erythraeum (strain IMS101) GN=Tery_0060 PE=4 SV=1	REVERSE_Q11AA1	0	0	0	0	0	1
Oxygen-dependent coproporphyrinogen-III oxidase OS=Trichodesmium erythraeum (strain IMS101) GN=hemF PE=3 SV=1	Q116P7	15	10	11	11	5	14
PAP fibrillin OS=Trichodesmium erythraeum (strain IMS101) GN=Tery_4591 PE=4 SV=1	Q10W07	1	3	5	3	1	3
PAS/PAC sensor signal transduction histidine kinase OS=Trichodesmium erythraeum (strain IMS101) GN=Tery_0203 PE=4 SV=1	Q119Y2	0	0	0	0	3	0
Patatin OS=Trichodesmium erythraeum (strain IMS101) GN=Tery_1796 PE=4 SV=1	Q114L9	24	24	21	22	20	23
Pathogenesis-related transcriptional factor and ERF OS=Trichodesmium erythraeum (strain IMS101) GN=Tery_4536 PE=4 SV=1	Q10W58	7	5	8	5	3	6
PBS lyase HEAT-like repeat OS=Trichodesmium erythraeum (strain IMS101) GN=Tery_0929 PE=4 SV=1	Q117K0	0	1	1	0	0	1
PBS lyase HEAT-like repeat OS=Trichodesmium erythraeum (strain IMS101) GN=Tery_0980 PE=4 SV=1	Q117G3	0	0	0	0	0	0
PBS lyase HEAT-like repeat OS=Trichodesmium erythraeum (strain IMS101) GN=Tery_0987 PE=4 SV=1	Q117F7	0	2	2	4	1	3
PBS lyase HEAT-like repeat OS=Trichodesmium erythraeum (strain IMS101) GN=Tery_0990 PE=4 SV=1	Q117F4	12	9	9	9	9	14
PBS lyase HEAT-like repeat OS=Trichodesmium erythraeum (strain IMS101) GN=Tery_0995 PE=4 SV=1	Q117F1	0	0	2	0	0	0
PBS lyase HEAT-like repeat OS=Trichodesmium erythraeum (strain IMS101) GN=Tery_2239 PE=4 SV=1	Q112V6	5	3	3	6	2	4
PBS lyase HEAT-like repeat OS=Trichodesmium erythraeum (strain IMS101) GN=Tery_2382 PE=4 SV=1	Q112H2	0	0	0	0	0	0
Penicillin-binding protein, 1A family OS=Trichodesmium erythraeum (strain IMS101) GN=Tery_0444 PE=4 SV=1	Q119C1	0	1	0	0	0	0
Pentapeptide repeat OS=Trichodesmium erythraeum (strain IMS101) GN=Tery_0271 PE=4 SV=1	Q119S0	8	10	10	10	5	11
Pentapeptide repeat OS=Trichodesmium erythraeum (strain IMS101) GN=Tery_0401 PE=4 SV=1	Q119F7	1	1	0	1	1	0
Pentapeptide repeat OS=Trichodesmium erythraeum (strain IMS101) GN=Tery_0734 PE=4 SV=1	Q118A9	9	8	9	7	8	9
Pentapeptide repeat OS=Trichodesmium erythraeum (strain IMS101) GN=Tery_1987 PE=4 SV=1	Q113T6	4	4	3	2	0	4
Pentapeptide repeat OS=Trichodesmium erythraeum (strain IMS101) GN=Tery_2129 PE=4 SV=1	Q113G1	11	10	11	12	7	11
Pentapeptide repeat OS=Trichodesmium erythraeum (strain IMS101) GN=Tery_4098 PE=4 SV=1	Q10XB8	0	0	0	0	0	1
Pentapeptide repeat OS=Trichodesmium erythraeum (strain IMS101) GN=Tery_4112 PE=4 SV=1	Q10XA4	0	0	0	0	0	0
Pentapeptide repeat OS=Trichodesmium erythraeum (strain IMS101) GN=Tery_4286 PE=4 SV=1	Q10WU2	9	8	7	7	5	11
PEP-utilising enzyme, mobile region OS=Trichodesmium erythraeum (strain IMS101) GN=Tery_3593 PE=3 SV=1	Q10YK3	0	0	0	0	0	0
Peptidase C14, caspase catalytic subunit p20 OS=Trichodesmium erythraeum (strain IMS101) GN=Tery_1841 PE=4 SV=1	Q114H7	1	4	2	3	4	5
Peptidase C14, caspase catalytic subunit P20 OS=Trichodesmium erythraeum (strain IMS101) GN=Tery_2012 PE=4 SV=1	Q113R4	1	2	2	1	1	1
Peptidase C14, caspase catalytic subunit p20 OS=Trichodesmium erythraeum (strain IMS101) GN=Tery_2471 PE=4 SV=1	Q111Z3	0	2	4	2	2	2
Peptidase C14, caspase catalytic subunit p20 OS=Trichodesmium erythraeum (strain IMS101) GN=Tery_2471 PE=4 SV=1	REVERSE_Q111Z3	0	0	0	0	0	0
Peptidase C14, caspase catalytic subunit p20 OS=Trichodesmium erythraeum (strain IMS101) GN=Tery_2624 PE=4 SV=1	Q111K5	4	8	5	4	6	6
Peptidase C14, caspase catalytic subunit p20 OS=Trichodesmium erythraeum (strain IMS101) GN=Tery_2624 PE=4 SV=1	REVERSE_Q111K5	0	0	0	0	0	0
Peptidase M1, membrane alanine aminopeptidase OS=Trichodesmium erythraeum (strain IMS101) GN=Tery_0295 PE=4 SV=1	Q119P9	52	46	51	44	35	52
Peptidase M14, carboxypeptidase A OS=Trichodesmium erythraeum (strain IMS101) GN=Tery_2921 PE=4 SV=1	Q110I7	5	6	6	6	3	5
Peptidase M16-like OS=Trichodesmium erythraeum (strain IMS101) GN=Tery_2773 PE=3 SV=1	Q110W8	14	14	11	8	9	11
Peptidase M16-like OS=Trichodesmium erythraeum (strain IMS101) GN=Tery_2774 PE=4 SV=1	Q110W7	8	5	8	7	0	8
Peptidase M16C associated OS=Trichodesmium erythraeum (strain IMS101) GN=Tery_1179 PE=4 SV=1	Q116N7	48	47	49	52	28	51
Peptidase M23B OS=Trichodesmium erythraeum (strain IMS101) GN=Tery_0237 PE=4 SV=1	REVERSE_Q119V0	0	0	0	0	0	0
Peptidase M23B OS=Trichodesmium erythraeum (strain IMS101) GN=Tery_1170 PE=4 SV=1	Q116P3	7	8	8	13	9	7
Peptidase M23B OS=Trichodesmium erythraeum (strain IMS101) GN=Tery_2558 PE=4 SV=1	Q111R6	0	0	0	1	0	0
Peptidase M23B OS=Trichodesmium erythraeum (strain IMS101) GN=Tery_4572 PE=4 SV=1	Q10W26	0	0	0	0	0	0
Peptidase M48, Ste24p OS=Trichodesmium erythraeum (strain IMS101) GN=Tery_0762 PE=3 SV=1	Q117Y5	1	0	0	0	0	0
Peptidase M48, Ste24p OS=Trichodesmium erythraeum (strain IMS101) GN=Tery_1907 PE=3 SV=1	Q114B2	0	1	1	0	1	1
Peptidase M48, Ste24p OS=Trichodesmium erythraeum (strain IMS101) GN=Tery_2250 PE=3 SV=1	Q112U5	0	0	0	0	0	0
Peptidase M50 OS=Trichodesmium erythraeum (strain IMS101) GN=Tery_0417 PE=4 SV=1	Q119E4	5	4	3	3	2	4
Peptidase M61 OS=Trichodesmium erythraeum (strain IMS101) GN=Tery_1038 PE=4 SV=1	Q117B4	11	9	10	11	12	10
Peptidase S1 and S6, chymotrypsin/Hap OS=Trichodesmium erythraeum (strain IMS101) GN=Tery_1884 PE=4 SV=1	Q114D4	0	0	0	0	0	0
Peptidase S1 and S6, chymotrypsin/Hap OS=Trichodesmium erythraeum (strain IMS101) GN=Tery_3517 PE=4 SV=1	Q10YR7	22	25	22	21	16	23
Peptidase S1 and S6, chymotrypsin/Hap OS=Trichodesmium erythraeum (strain IMS101) GN=Tery_4416 PE=4 SV=1	Q10WH0	2	3	0	0	2	3
Peptidase S1 and S6, chymotrypsin/Hap OS=Trichodesmium erythraeum (strain IMS101) GN=Tery_5059 PE=4 SV=1	Q10UW0	2	0	0	1	0	2
Peptidase S15 OS=Trichodesmium erythraeum (strain IMS101) GN=Tery_0437 PE=4 SV=1	Q119C8	0	0	0	0	0	0
Peptidase S16, lon-like OS=Trichodesmium erythraeum (strain IMS101) GN=Tery_0478 PE=4 SV=1	Q118Z0	0	0	0	0	0	0
Peptidase S8 and S53, subtilisin, kexin, sedolisin OS=Trichodesmium erythraeum (strain IMS101) GN=Tery_0117 PE=3 SV=1	Q11A60	0	3	1	0	2	1
Peptidase S8 and S53, subtilisin, kexin, sedolisin OS=Trichodesmium erythraeum (strain IMS101) GN=Tery_2196 PE=4 SV=1	Q112Z9	3	4	2	3	3	4
Peptidase S8 and S53, subtilisin, kexin, sedolisin OS=Trichodesmium erythraeum (strain IMS101) GN=Tery_2362 PE=4 SV=1	Q112J2	100	100	103	100	80	97
Peptidase S8 and S53, subtilisin, kexin, sedolisin OS=Trichodesmium erythraeum (strain IMS101) GN=Tery_2365 PE=4 SV=1	Q112I9	11	15	14	15	9	12
Peptidase S8 and S53, subtilisin, kexin, sedolisin OS=Trichodesmium erythraeum (strain IMS101) GN=Tery_4393 PE=4 SV=1	Q10WJ3	6	8	8	6	5	9
Peptidase S9, prolyl oligopeptidase active site region OS=Trichodesmium erythraeum (strain IMS101) GN=Tery_1371 PE=4 SV=1	Q115Z2	21	23	22	18	15	24
Peptidase S9, prolyl oligopeptidase active site region OS=Trichodesmium erythraeum (strain IMS101) GN=Tery_2052 PE=4 SV=1	Q113N1	9	10	11	6	4	11
Peptidase S9, prolyl oligopeptidase active site region OS=Trichodesmium erythraeum (strain IMS101) GN=Tery_2052 PE=4 SV=1	REVERSE_Q113N1	0	0	0	0	0	0
Peptidase U61, LD-carboxypeptidase A OS=Trichodesmium erythraeum (strain IMS101) GN=Tery_5012 PE=4 SV=1	Q10V00	0	0	0	0	0	0
Peptidase U62, modulator of DNA gyrase OS=Trichodesmium erythraeum (strain IMS101) GN=Tery_1106 PE=4 SV=1	Q116V3	3	0	0	0	0	0
Peptidase-like OS=Trichodesmium erythraeum (strain IMS101) GN=Tery_0783 PE=4 SV=1	Q117X1	21	25	25	18	18	21
Peptidase-like OS=Trichodesmium erythraeum (strain IMS101) GN=Tery_1461 PE=4 SV=1	Q115S3	0	0	2	2	0	2
Peptidase-like OS=Trichodesmium erythraeum (strain IMS101) GN=Tery_1892 PE=4 SV=1	Q114C6	186	203	202	182	126	186
Peptidase-like OS=Trichodesmium erythraeum (strain IMS101) GN=Tery_1893 PE=4 SV=1	REVERSE_Q114C5	0	0	0	0	0	0
Peptidase-like OS=Trichodesmium erythraeum (strain IMS101) GN=Tery_1893 PE=4 SV=1	Q114C5	0	0	0	0	0	0
Peptidase-like OS=Trichodesmium erythraeum (strain IMS101) GN=Tery_2814 PE=4 SV=1	Q110T4	3	5	6	1	6	3
Peptidase-like OS=Trichodesmium erythraeum (strain IMS101) GN=Tery_3497 PE=4 SV=1	Q10YT7	0	0	0	0	0	0
Peptidase-like OS=Trichodesmium erythraeum (strain IMS101) GN=Tery_3711 PE=4 SV=1	Q10YA4	7	8	9	4	3	6
Peptidase-like OS=Trichodesmium erythraeum (strain IMS101) GN=Tery_4303 PE=4 SV=1	Q10WS6	0	0	0	1	0	0
Peptide chain release factor 1 OS=Trichodesmium erythraeum (strain IMS101) GN=prfA PE=3 SV=1	Q110D7	12	11	15	10	8	13
Peptide chain release factor 2 OS=Trichodesmium erythraeum (strain IMS101) GN=Tery_2120 PE=3 SV=1	Q113G9	0	0	0	0	0	0
Peptide chain release factor 2 OS=Trichodesmium erythraeum (strain IMS101) GN=Tery_2120 PE=3 SV=1	REVERSE_Q113G9	0	0	0	0	0	0
Peptide chain release factor 3 OS=Trichodesmium erythraeum (strain IMS101) GN=prfC PE=3 SV=1	Q110K2	4	4	5	6	7	7
Peptide deformylase OS=Trichodesmium erythraeum (strain IMS101) GN=def PE=3 SV=1	Q117U9	0	0	0	0	2	0
Peptide methionine sulfoxide reductase MsrA OS=Trichodesmium erythraeum (strain IMS101) GN=msrA PE=3 SV=1	Q119G2	5	8	13	7	9	11
Peptide methionine sulfoxide reductase MsrB OS=Trichodesmium erythraeum (strain IMS101) GN=msrB PE=3 SV=1	Q10XE3	0	3	4	4	2	4
Peptidoglycan-binding domain 1 OS=Trichodesmium erythraeum (strain IMS101) GN=Tery_4350 PE=4 SV=1	Q10WN2	1	3	3	2	3	4
Peptidoglycan-binding domain 1 OS=Trichodesmium erythraeum (strain IMS101) GN=Tery_4788 PE=4 SV=1	Q10VI5	25	23	25	25	11	24
Peptidyl-prolyl cis-trans isomerase OS=Trichodesmium erythraeum (strain IMS101) GN=Tery_0301 PE=3 SV=1	Q119P4	20	25	26	22	13	24
Peptidyl-prolyl cis-trans isomerase OS=Trichodesmium erythraeum (strain IMS101) GN=Tery_0511 PE=3 SV=1	Q118V8	7	10	9	11	4	8
Peptidyl-prolyl cis-trans isomerase OS=Trichodesmium erythraeum (strain IMS101) GN=Tery_1467 PE=3 SV=1	Q115R7	45	37	37	48	24	35
Peptidyl-prolyl cis-trans isomerase, cyclophilin type OS=Trichodesmium erythraeum (strain IMS101) GN=Tery_1312 PE=4 SV=1	Q116D7	59	46	49	47	34	41
Peptidyl-prolyl cis-trans isomerase, cyclophilin type OS=Trichodesmium erythraeum (strain IMS101) GN=Tery_2704 PE=4 SV=1	Q111D1	6	7	6	3	5	7
Peptidyl-prolyl cis-trans isomerase, cyclophilin type OS=Trichodesmium erythraeum (strain IMS101) GN=Tery_2705 PE=4 SV=1	Q111D0	5	7	6	5	5	6
Peptidyl-tRNA hydrolase OS=Trichodesmium erythraeum (strain IMS101) GN=pth PE=3 SV=1	Q110N1	3	0	3	3	3	0
Peptidylprolyl isomerase OS=Trichodesmium erythraeum (strain IMS101) GN=Tery_1353 PE=4 SV=1	Q116A8	0	0	0	0	0	0
Peptidylprolyl isomerase OS=Trichodesmium erythraeum (strain IMS101) GN=Tery_3559 PE=4 SV=1	Q10YN0	32	30	31	27	19	38
Periplasmic binding protein OS=Trichodesmium erythraeum (strain IMS101) GN=Tery_3943 PE=4 SV=1	Q10XQ2	21	20	19	19	17	20
Periplasmic polyamine-binding protein of ABC transporter OS=Trichodesmium erythraeum (strain IMS101) GN=Tery_2833 PE=4 SV=1	Q110R7	0	0	0	0	0	0
Periplasmic protein TonB links inner and outer membranes-like OS=Trichodesmium erythraeum (strain IMS101) GN=Tery_2593 PE=4 SV=1	Q111N4	50	43	47	43	26	47
Periplasmic sensor signal transduction histidine kinase OS=Trichodesmium erythraeum (strain IMS101) GN=Tery_1669 PE=4 SV=1	Q114Y4	0	0	0	1	0	0
Periplasmic solute binding protein OS=Trichodesmium erythraeum (strain IMS101) GN=Tery_3218 PE=3 SV=1	Q10ZI8	1	0	0	1	0	0
PfkB OS=Trichodesmium erythraeum (strain IMS101) GN=Tery_1940 PE=4 SV=1	Q113X9	0	0	0	0	0	0
PfkB OS=Trichodesmium erythraeum (strain IMS101) GN=Tery_2734 PE=4 SV=1	Q111A6	8	9	13	10	9	12
PfkB OS=Trichodesmium erythraeum (strain IMS101) GN=Tery_3284 PE=3 SV=1	Q10ZC8	34	32	35	26	20	36
PHA accumulation regulator DNA-binding-like OS=Trichodesmium erythraeum (strain IMS101) GN=Tery_2388 PE=4 SV=1	Q112G8	8	8	6	8	5	8
Phage shock protein A, PspA OS=Trichodesmium erythraeum (strain IMS101) GN=Tery_4081 PE=4 SV=1	Q10XD4	55	59	57	53	36	59
Phage shock protein A, PspA OS=Trichodesmium erythraeum (strain IMS101) GN=Tery_4082 PE=4 SV=1	Q10XD3	23	22	22	25	18	22
Phage Tail Collar OS=Trichodesmium erythraeum (strain IMS101) GN=Tery_1091 PE=4 SV=1	Q116W7	77	80	80	76	60	78
Phenylalanine--tRNA ligase alpha subunit OS=Trichodesmium erythraeum (strain IMS101) GN=pheS PE=3 SV=1	Q10YV2	13	15	13	17	8	14
Phenylalanine--tRNA ligase beta subunit OS=Trichodesmium erythraeum (strain IMS101) GN=pheT PE=3 SV=1	Q113M0	16	14	16	11	12	17
Pheophorbide a oxygenase OS=Trichodesmium erythraeum (strain IMS101) GN=Tery_3793 PE=4 SV=1	Q10Y35	1	1	0	1	0	0
Phosphate acyltransferase OS=Trichodesmium erythraeum (strain IMS101) GN=plsX PE=3 SV=1	Q114K1	23	22	25	20	11	21
Phosphate transport system permease protein PstA OS=Trichodesmium erythraeum (strain IMS101) GN=Tery_3539 PE=3 SV=1	Q10YP8	0	0	0	0	0	0
Phosphate-binding protein OS=Trichodesmium erythraeum (strain IMS101) GN=Tery_3534 PE=3 SV=1	Q10YQ2	42	39	38	40	28	31
Phosphate-binding protein OS=Trichodesmium erythraeum (strain IMS101) GN=Tery_3537 PE=3 SV=1	Q10YQ0	43	44	45	42	29	44
Phosphoenolpyruvate carboxylase OS=Trichodesmium erythraeum (strain IMS101) GN=ppc PE=3 SV=1	Q117S5	7	7	7	6	5	8
Phosphoenolpyruvate synthase OS=Trichodesmium erythraeum (strain IMS101) GN=Tery_4209 PE=3 SV=1	Q10X13	0	0	0	0	0	0
Phosphoglucomutase OS=Trichodesmium erythraeum (strain IMS101) GN=Tery_0970 PE=3 SV=1	Q117H1	8	11	9	9	6	7
Phosphoglucomutase/phosphomannomutase alpha/beta/alpha domain I OS=Trichodesmium erythraeum (strain IMS101) GN=Tery_1084 PE=3 SV=1	Q116X2	53	58	53	48	36	66
Phosphoglycerate kinase OS=Trichodesmium erythraeum (strain IMS101) GN=pgk PE=3 SV=1	Q10Z46	234	242	243	256	177	260
Phosphoglycerate mutase OS=Trichodesmium erythraeum (strain IMS101) GN=Tery_2127 PE=4 SV=1	Q113G3	4	3	4	3	2	4
Phosphoglycerate mutase OS=Trichodesmium erythraeum (strain IMS101) GN=Tery_2181 PE=3 SV=1	Q113B2	23	23	26	25	13	22
Phospholipase/Carboxylesterase OS=Trichodesmium erythraeum (strain IMS101) GN=Tery_2641 PE=4 SV=1	Q111I8	4	5	3	5	3	3
Phospholipase/Carboxylesterase OS=Trichodesmium erythraeum (strain IMS101) GN=Tery_3567 PE=4 SV=1	Q10YM3	0	0	0	0	0	0
Phosphomethylpyrimidine kinase OS=Trichodesmium erythraeum (strain IMS101) GN=Tery_3765 PE=4 SV=1	Q10Y60	0	2	2	0	1	3
Phosphonate ABC transporter, periplasmic phosphonate-binding protein OS=Trichodesmium erythraeum (strain IMS101) GN=Tery_0366 PE=4 SV=1	Q119I9	34	27	28	33	25	28
Phosphonate ABC transporter, periplasmic phosphonate-binding protein OS=Trichodesmium erythraeum (strain IMS101) GN=Tery_4153 PE=4 SV=1	Q10X64	4	5	3	4	4	6
Phosphonate ABC transporter, periplasmic phosphonate-binding protein OS=Trichodesmium erythraeum (strain IMS101) GN=Tery_4993 PE=4 SV=1	Q10V17	35	35	37	38	31	31
Phosphonate metabolism OS=Trichodesmium erythraeum (strain IMS101) GN=Tery_4999 PE=4 SV=1	Q10V11	1	0	1	0	0	0
Phosphonate metabolism protein PhnM OS=Trichodesmium erythraeum (strain IMS101) GN=Tery_5003 PE=4 SV=1	Q10V07	0	2	0	2	0	0
Phosphoribosylamine--glycine ligase OS=Trichodesmium erythraeum (strain IMS101) GN=purD PE=3 SV=1	Q115R3	5	6	6	3	6	6
Phosphoribosylaminoimidazole-succinocarboxamide synthase OS=Trichodesmium erythraeum (strain IMS101) GN=purC PE=3 SV=1	Q10VV0	9	7	9	6	5	8
Phosphoribosylformylglycinamidine cyclo-ligase OS=Trichodesmium erythraeum (strain IMS101) GN=purM PE=3 SV=1	Q110U7	0	1	2	0	0	3
Phosphoribosylformylglycinamidine synthase subunit PurL OS=Trichodesmium erythraeum (strain IMS101) GN=purL PE=3 SV=1	Q111N1	4	5	4	3	3	4
Phosphoribosylformylglycinamidine synthase subunit PurS OS=Trichodesmium erythraeum (strain IMS101) GN=purS PE=3 SV=1	Q113W7	0	0	0	0	0	0
Phosphoribosylglycinamide formyltransferase OS=Trichodesmium erythraeum (strain IMS101) GN=purN PE=3 SV=1	Q10VW9	1	0	0	0	1	0
Phosphoribulokinase OS=Trichodesmium erythraeum (strain IMS101) GN=Tery_3654 PE=4 SV=1	Q10YF7	45	48	50	44	28	43
Phosphoribulokinase/uridine kinase OS=Trichodesmium erythraeum (strain IMS101) GN=Tery_1845 PE=4 SV=1	Q114H3	9	6	7	8	2	7
Photosystem antenna protein-like OS=Trichodesmium erythraeum (strain IMS101) GN=Tery_1667 PE=4 SV=1	Q114Y6	69	84	83	84	59	88
Photosystem antenna protein-like OS=Trichodesmium erythraeum (strain IMS101) GN=Tery_2483 PE=4 SV=1	Q111Y3	52	55	57	59	35	59
Photosystem antenna protein-like OS=Trichodesmium erythraeum (strain IMS101) GN=Tery_2484 PE=4 SV=1	Q111Y2	51	49	53	56	39	65
Photosystem antenna protein-like OS=Trichodesmium erythraeum (strain IMS101) GN=Tery_2485 PE=4 SV=1	Q111Y1	31	26	31	33	20	34
Photosystem I assembly protein Ycf3 OS=Trichodesmium erythraeum (strain IMS101) GN=ycf3 PE=3 SV=2	Q10W18	0	0	0	0	1	0
Photosystem I assembly protein Ycf4 OS=Trichodesmium erythraeum (strain IMS101) GN=ycf4 PE=3 SV=1	Q118V7	3	2	4	3	3	3
Photosystem I iron-sulfur center OS=Trichodesmium erythraeum (strain IMS101) GN=psaC PE=3 SV=1	Q119B1	46	47	46	46	31	49
Photosystem I P700 chlorophyll a apoprotein A2 OS=Trichodesmium erythraeum (strain IMS101) GN=psaB PE=3 SV=1	Q10VT8	36	35	38	38	32	41
Photosystem I protein PsaD OS=Trichodesmium erythraeum (strain IMS101) GN=Tery_3791 PE=4 SV=1	Q10Y37	64	65	67	76	52	66
Photosystem I reaction center protein PsaF, subunit III OS=Trichodesmium erythraeum (strain IMS101) GN=Tery_1634 PE=4 SV=1	Q115B4	33	44	43	44	41	44
Photosystem I reaction center subunit IV OS=Trichodesmium erythraeum (strain IMS101) GN=psaE PE=3 SV=1	Q117D3	42	38	41	45	35	45
Photosystem I reaction center subunit XI OS=Trichodesmium erythraeum (strain IMS101) GN=psaL PE=3 SV=1	Q116L4	9	7	9	10	3	9
Photosystem II 12 kDa extrinsic protein OS=Trichodesmium erythraeum (strain IMS101) GN=psbU PE=3 SV=1	Q10VH7	65	65	66	64	47	69
Photosystem II CP43 reaction center protein OS=Trichodesmium erythraeum (strain IMS101) GN=psbC PE=3 SV=1	Q118V6	45	48	51	40	36	60
Photosystem II CP47 reaction center protein OS=Trichodesmium erythraeum (strain IMS101) GN=psbB PE=3 SV=1	Q10VU0	95	92	87	80	72	105
Photosystem II D2 protein OS=Trichodesmium erythraeum (strain IMS101) GN=psbD PE=3 SV=1	Q116J3	30	30	30	27	20	32
Photosystem II lipoprotein Psb27 OS=Trichodesmium erythraeum (strain IMS101) GN=psb27 PE=3 SV=1	Q114S4	17	18	17	17	9	16
Photosystem II manganese-stabilizing protein PsbO OS=Trichodesmium erythraeum (strain IMS101) GN=Tery_3917 PE=4 SV=1	Q10XS5	65	70	69	68	45	69
Photosystem II oxygen evolving complex protein PsbP OS=Trichodesmium erythraeum (strain IMS101) GN=Tery_0164 PE=4 SV=1	Q11A16	22	26	24	23	19	25
Photosystem II reaction center protein H OS=Trichodesmium erythraeum (strain IMS101) GN=psbH PE=3 SV=1	Q110N3	0	0	0	0	0	0
Photosystem II reaction center Psb28 protein OS=Trichodesmium erythraeum (strain IMS101) GN=psb28 PE=3 SV=2	Q112E8	19	21	19	20	14	24
Phycobilisome 7.8 kDa linker polypeptide, allophycocyanin-associated, core OS=Trichodesmium erythraeum (strain IMS101) GN=Tery_3647 PE=3 SV=1	Q10YG2	20	27	21	25	16	20
Phycobilisome linker polypeptide OS=Trichodesmium erythraeum (strain IMS101) GN=Tery_0985 PE=3 SV=1	Q117F9	81	83	87	98	67	85
Phycobilisome linker polypeptide OS=Trichodesmium erythraeum (strain IMS101) GN=Tery_0999 PE=3 SV=1	Q117E7	69	64	78	79	55	79
Phycobilisome linker polypeptide OS=Trichodesmium erythraeum (strain IMS101) GN=Tery_2486 PE=3 SV=1	Q111Y0	31	24	27	20	20	34
Phycobilisome linker polypeptide OS=Trichodesmium erythraeum (strain IMS101) GN=Tery_3909 PE=3 SV=1	Q10XT2	253	234	247	271	178	244
Phycobilisome linker polypeptide OS=Trichodesmium erythraeum (strain IMS101) GN=Tery_4104 PE=3 SV=1	Q10XB2	114	120	123	124	82	115
Phycobilisome linker polypeptide OS=Trichodesmium erythraeum (strain IMS101) GN=Tery_4105 PE=3 SV=1	Q10XB1	95	86	84	88	47	75
Phycobilisome protein OS=Trichodesmium erythraeum (strain IMS101) GN=Tery_0983 PE=3 SV=1	Q117G1	424	386	419	428	322	335
Phycobilisome protein OS=Trichodesmium erythraeum (strain IMS101) GN=Tery_0984 PE=3 SV=1	Q117G0	422	426	420	478	342	373
Phycobilisome protein OS=Trichodesmium erythraeum (strain IMS101) GN=Tery_3240 PE=3 SV=1	Q10ZG9	2	3	3	2	2	3
Phycobilisome protein OS=Trichodesmium erythraeum (strain IMS101) GN=Tery_3650 PE=3 SV=1	Q10YG0	335	245	292	402	170	221
Phycobilisome protein OS=Trichodesmium erythraeum (strain IMS101) GN=Tery_4799 PE=3 SV=1	Q10VH4	35	35	33	31	23	43
Phycocyanin, alpha subunit OS=Trichodesmium erythraeum (strain IMS101) GN=Tery_5048 PE=3 SV=1	Q10UW8	570	564	552	533	415	502
Phycocyanin, beta subunit OS=Trichodesmium erythraeum (strain IMS101) GN=Tery_5049 PE=3 SV=1	Q10UW7	218	227	229	230	172	218
Phycoerythrobilin:ferredoxin oxidoreductase OS=Trichodesmium erythraeum (strain IMS101) GN=pebB PE=3 SV=1	Q10UW6	1	0	0	0	0	0
Phytanoyl-CoA dioxygenase OS=Trichodesmium erythraeum (strain IMS101) GN=Tery_3102 PE=4 SV=1	Q10ZT9	6	4	6	3	4	5
Phytochelatin synthase-like OS=Trichodesmium erythraeum (strain IMS101) GN=Tery_2472 PE=4 SV=1	Q111Z2	0	0	0	0	0	2
PilT protein-like OS=Trichodesmium erythraeum (strain IMS101) GN=Tery_1195 PE=4 SV=1	Q116M2	0	0	0	0	1	1
Pirin-like OS=Trichodesmium erythraeum (strain IMS101) GN=Tery_0103 PE=3 SV=1	Q11A70	0	0	0	0	0	0
Plastocyanin OS=Trichodesmium erythraeum (strain IMS101) GN=Tery_2563 PE=4 SV=1	Q111R2	47	67	64	59	42	71
Polar amino acid ABC transporter, inner membrane subunit OS=Trichodesmium erythraeum (strain IMS101) GN=Tery_1999 PE=3 SV=1	Q113S6	2	0	0	0	2	3
Polyamine aminopropyltransferase OS=Trichodesmium erythraeum (strain IMS101) GN=speE PE=3 SV=1	Q117N7	0	5	3	3	2	3
Polyamine aminopropyltransferase OS=Trichodesmium erythraeum (strain IMS101) GN=speE PE=3 SV=1	Q118C0	0	1	2	2	0	1
Polyphosphate kinase OS=Trichodesmium erythraeum (strain IMS101) GN=ppk PE=3 SV=1	Q116U7	1	1	2	2	0	2
Polyribonucleotide nucleotidyltransferase OS=Trichodesmium erythraeum (strain IMS101) GN=pnp PE=3 SV=1	Q115K2	79	93	84	87	66	98
Polysaccharide deacetylase OS=Trichodesmium erythraeum (strain IMS101) GN=Tery_3931 PE=4 SV=1	Q10XR2	0	0	0	0	0	0
Porphobilinogen deaminase OS=Trichodesmium erythraeum (strain IMS101) GN=hemC PE=3 SV=1	Q10VY0	13	12	19	15	7	13
PRC-barrel OS=Trichodesmium erythraeum (strain IMS101) GN=Tery_1550 PE=4 SV=1	Q115J4	10	11	11	8	6	15
Precorrin-3 methyltransferase OS=Trichodesmium erythraeum (strain IMS101) GN=Tery_4366 PE=4 SV=1	Q10WL6	3	1	0	0	0	1
Precorrin-8X methylmutase OS=Trichodesmium erythraeum (strain IMS101) GN=Tery_3745 PE=4 SV=1	Q10Y76	0	0	0	2	0	0
Primary replicative DNA helicase OS=Trichodesmium erythraeum (strain IMS101) GN=Tery_1462 PE=4 SV=1	REVERSE_Q115S2	0	0	0	0	0	0
Probable 2-phosphosulfolactate phosphatase OS=Trichodesmium erythraeum (strain IMS101) GN=comB PE=3 SV=1	Q116L2	17	16	14	16	11	15
Probable 30S ribosomal protein PSRP-3 OS=Trichodesmium erythraeum (strain IMS101) GN=Tery_3451 PE=3 SV=1	Q10YY1	21	25	26	13	18	24
Probable aspartoacylase OS=Trichodesmium erythraeum (strain IMS101) GN=Tery_4698 PE=3 SV=1	Q10VR3	3	2	0	0	0	3
Probable cytosol aminopeptidase OS=Trichodesmium erythraeum (strain IMS101) GN=pepA PE=3 SV=1	Q11A96	87	87	97	88	60	88
Probable dual-specificity RNA methyltransferase RlmN OS=Trichodesmium erythraeum (strain IMS101) GN=rlmN PE=3 SV=1	Q110I1	0	0	0	0	0	0
Probable transcriptional regulatory protein Tery_2125 OS=Trichodesmium erythraeum (strain IMS101) GN=Tery_2125 PE=3 SV=1	Q113G4	2	0	0	0	0	0
Proline--tRNA ligase OS=Trichodesmium erythraeum (strain IMS101) GN=proS PE=3 SV=1	Q116D3	19	22	19	17	13	26
Prolyl oligopeptidase. Serine peptidase. MEROPS family S09A OS=Trichodesmium erythraeum (strain IMS101) GN=Tery_3157 PE=4 SV=1	Q10ZN9	3	3	2	2	1	4
Protein GrpE OS=Trichodesmium erythraeum (strain IMS101) GN=grpE PE=3 SV=1	Q114R5	18	19	22	19	15	20
Protein PatA OS=Trichodesmium erythraeum (strain IMS101) GN=Tery_0608 PE=2 SV=1	Q118M2	0	0	0	0	0	0
Protein RecA OS=Trichodesmium erythraeum (strain IMS101) GN=recA PE=3 SV=1	Q111E0	11	12	9	9	6	8
Protein serine/threonine phosphatase OS=Trichodesmium erythraeum (strain IMS101) GN=Tery_1950 PE=4 SV=1	Q113X1	3	4	0	2	0	1
Protein serine/threonine phosphatases OS=Trichodesmium erythraeum (strain IMS101) GN=Tery_3297 PE=4 SV=1	Q10ZB9	3	4	4	4	2	5
Protein splicing site OS=Trichodesmium erythraeum (strain IMS101) GN=Tery_1543 PE=4 SV=1	Q115K1	0	0	1	0	0	0
Protein splicing site OS=Trichodesmium erythraeum (strain IMS101) GN=Tery_1543 PE=4 SV=1	REVERSE_Q115K1	0	0	0	0	0	0
Protein splicing site OS=Trichodesmium erythraeum (strain IMS101) GN=Tery_2478 PE=4 SV=1	Q111Y7	11	11	12	13	11	17
Protein Thf1 OS=Trichodesmium erythraeum (strain IMS101) GN=thf1 PE=3 SV=1	Q116P5	23	23	24	17	18	24
Protein translocase subunit SecA OS=Trichodesmium erythraeum (strain IMS101) GN=secA PE=3 SV=1	Q10VW7	32	37	46	38	29	32
Protein translocase subunit SecD OS=Trichodesmium erythraeum (strain IMS101) GN=secD PE=3 SV=1	Q10UU4	7	8	9	6	4	8
Protein translocase subunit SecE OS=Trichodesmium erythraeum (strain IMS101) GN=secE PE=3 SV=1	Q119S4	3	0	4	2	3	4
Protein tyrosine phosphatase OS=Trichodesmium erythraeum (strain IMS101) GN=Tery_3848 PE=4 SV=1	Q10XY4	3	2	3	2	4	4
Protein tyrosine phosphatase OS=Trichodesmium erythraeum (strain IMS101) GN=Tery_4026 PE=4 SV=1	Q10XI0	3	2	4	4	2	3
Protein-export membrane protein SecF OS=Trichodesmium erythraeum (strain IMS101) GN=secF PE=3 SV=1	Q10UU5	4	3	4	3	0	3
Proton-translocating NADH-quinone oxidoreductase, chain L OS=Trichodesmium erythraeum (strain IMS101) GN=Tery_0660 PE=4 SV=1	Q118H5	7	9	6	8	8	6
Protoporphyrin ferrochelatase OS=Trichodesmium erythraeum (strain IMS101) GN=Tery_0602 PE=3 SV=1	Q118M8	3	2	2	2	2	2
Protoporphyrinogen oxidase OS=Trichodesmium erythraeum (strain IMS101) GN=Tery_2218 PE=4 SV=1	Q112X7	23	25	24	19	16	30
Putative anti-sigma regulatory factor, serine/threonine protein kinase OS=Trichodesmium erythraeum (strain IMS101) GN=Tery_5013 PE=4 SV=1	Q10UZ9	7	4	5	5	2	4
Putative branched-chain amino acid aminotransferase OS=Trichodesmium erythraeum (strain IMS101) GN=Tery_4094 PE=4 SV=1	Q10XC2	1	0	0	0	0	0
Putative CheA signal transduction histidine kinases OS=Trichodesmium erythraeum (strain IMS101) GN=Tery_2347 PE=4 SV=1	Q112K7	1	1	2	0	0	1
Putative CheA signal transduction histidine kinases OS=Trichodesmium erythraeum (strain IMS101) GN=Tery_3244 PE=4 SV=1	Q10ZG5	1	0	0	0	1	0
Putative endoribonuclease L-PSP OS=Trichodesmium erythraeum (strain IMS101) GN=Tery_2416 PE=4 SV=1	Q112E1	16	14	16	14	8	11
Putative enzyme of poly-gamma-glutamate biosynthesis (Capsule formation)-like OS=Trichodesmium erythraeum (strain IMS101) GN=Tery_0958 PE=4 SV=1	Q117H7	0	0	0	1	0	0
Putative flavin-binding monooxygenase OS=Trichodesmium erythraeum (strain IMS101) GN=Tery_3824 PE=4 SV=1	Q10Y06	3	3	3	1	0	2
Putative GAF sensor protein OS=Trichodesmium erythraeum (strain IMS101) GN=Tery_3971 PE=4 SV=1	Q10XM8	2	2	1	1	1	2
Putative galactoside ABC transporter OS=Trichodesmium erythraeum (strain IMS101) GN=Tery_0801 PE=4 SV=1	Q117V6	7	7	11	6	6	10
Putative multicomponent Na+:H+ antiporter subunit B OS=Trichodesmium erythraeum (strain IMS101) GN=Tery_1619 PE=4 SV=1	Q115C6	0	0	2	2	0	0
Putative nickel-containing superoxide dismutase (NISOD) OS=Trichodesmium erythraeum (strain IMS101) GN=Tery_0891 PE=4 SV=1	Q117N2	22	21	24	20	13	18
Putative phosphoribosylaminoimidazole carboxylase catalytic subunit OS=Trichodesmium erythraeum (strain IMS101) GN=Tery_4722 PE=4 SV=1	Q10VP0	0	1	2	2	0	3
Putative pterin-4-alpha-carbinolamine dehydratase OS=Trichodesmium erythraeum (strain IMS101) GN=Tery_1232 PE=3 SV=1	Q116J2	19	21	20	18	14	22
Putative RNA methylase OS=Trichodesmium erythraeum (strain IMS101) GN=Tery_0249 PE=3 SV=1	Q119T9	2	0	0	0	0	2
Putative secreted protein OS=Trichodesmium erythraeum (strain IMS101) GN=Tery_0706 PE=4 SV=1	Q118D4	25	26	22	26	19	26
Putative sensor protein OS=Trichodesmium erythraeum (strain IMS101) GN=Tery_4298 PE=4 SV=1	Q10WT1	37	37	37	37	28	35
Putative signal transduction protein with CBS domains OS=Trichodesmium erythraeum (strain IMS101) GN=Tery_2240 PE=4 SV=1	Q112V5	9	9	8	3	3	9
Putative signal transduction protein with Nacht domain OS=Trichodesmium erythraeum (strain IMS101) GN=Tery_2632 PE=4 SV=1	Q111J7	2	4	5	5	0	0
Putative signal transduction protein with Nacht domain OS=Trichodesmium erythraeum (strain IMS101) GN=Tery_2632 PE=4 SV=1	REVERSE_Q111J7	0	0	0	0	0	0
Putative signal transduction protein with Nacht domain OS=Trichodesmium erythraeum (strain IMS101) GN=Tery_3571 PE=4 SV=1	Q10YL9	1	5	6	4	1	7
Putative signal transduction protein with Nacht domain OS=Trichodesmium erythraeum (strain IMS101) GN=Tery_4985 PE=4 SV=1	Q10V25	0	2	0	0	0	2
Putative transcriptional regulator OS=Trichodesmium erythraeum (strain IMS101) GN=Tery_0202 PE=4 SV=1	Q119Y3	3	1	2	0	0	1
Pyridine nucleotide-disulphide oxidoreductase dimerisation region OS=Trichodesmium erythraeum (strain IMS101) GN=Tery_1612 PE=4 SV=1	Q115D3	0	0	0	0	0	0
Pyridine nucleotide-disulphide oxidoreductase dimerisation region OS=Trichodesmium erythraeum (strain IMS101) GN=Tery_3348 PE=3 SV=1	Q10Z74	0	0	3	0	0	2
Pyridoxal-5'-phosphate-dependent enzyme, beta subunit OS=Trichodesmium erythraeum (strain IMS101) GN=Tery_4742 PE=4 SV=1	Q10VM5	19	24	23	20	15	25
Pyridoxamine 5'-phosphate oxidase-related, FMN-binding OS=Trichodesmium erythraeum (strain IMS101) GN=Tery_3018 PE=4 SV=1	Q110A1	1	0	0	0	0	1
Pyridoxine 5'-phosphate synthase OS=Trichodesmium erythraeum (strain IMS101) GN=pdxJ PE=3 SV=1	Q10X41	0	0	0	0	0	0
Pyrroline-5-carboxylate reductase OS=Trichodesmium erythraeum (strain IMS101) GN=proC PE=3 SV=1	Q10V93	0	0	2	0	0	0
Pyruvate dehydrogenase E1 component subunit alpha OS=Trichodesmium erythraeum (strain IMS101) GN=pdhA PE=4 SV=1	Q10UV4	35	25	29	31	20	34
Pyruvate kinase OS=Trichodesmium erythraeum (strain IMS101) GN=Tery_2926 PE=3 SV=1	Q110I2	35	35	34	34	24	41
Queuine tRNA-ribosyltransferase OS=Trichodesmium erythraeum (strain IMS101) GN=tgt PE=3 SV=1	Q112A6	5	4	5	4	4	5
Radical SAM OS=Trichodesmium erythraeum (strain IMS101) GN=Tery_2906 PE=4 SV=1	REVERSE_Q110K0	0	0	0	0	0	0
Radical SAM OS=Trichodesmium erythraeum (strain IMS101) GN=Tery_4389 PE=4 SV=1	Q10WJ6	7	13	6	9	15	12
Radical SAM OS=Trichodesmium erythraeum (strain IMS101) GN=Tery_4964 PE=4 SV=1	Q10V46	1	1	1	0	0	0
Radical SAM OS=Trichodesmium erythraeum (strain IMS101) GN=Tery_4964 PE=4 SV=1	REVERSE_Q10V46	1	0	1	0	0	1
Redoxin OS=Trichodesmium erythraeum (strain IMS101) GN=Tery_0162 PE=4 SV=1	Q11A18	170	174	174	177	123	167
Redoxin OS=Trichodesmium erythraeum (strain IMS101) GN=Tery_0234 PE=4 SV=1	Q119V2	0	0	3	2	0	2
Redoxin OS=Trichodesmium erythraeum (strain IMS101) GN=Tery_2703 PE=4 SV=1	Q111D2	6	8	8	7	4	6
Redoxin OS=Trichodesmium erythraeum (strain IMS101) GN=Tery_3182 PE=4 SV=1	Q10ZL7	4	4	3	4	3	4
Redoxin OS=Trichodesmium erythraeum (strain IMS101) GN=Tery_3842 PE=4 SV=1	Q10XZ0	28	34	31	27	19	29
Redoxin OS=Trichodesmium erythraeum (strain IMS101) GN=Tery_3959 PE=4 SV=1	Q10XN9	64	82	82	83	49	80
REG-2-like, HAD superfamily (Subfamily IA) hydrolase OS=Trichodesmium erythraeum (strain IMS101) GN=Tery_3660 PE=4 SV=1	Q10YF2	0	1	0	0	0	2
Regulatory protein CII OS=Trichodesmium erythraeum (strain IMS101) GN=Tery_3667 PE=4 SV=1	Q10YE5	0	0	0	1	0	0
Response regulator receiver modulated serine phosphatase with GAF sensor OS=Trichodesmium erythraeum (strain IMS101) GN=Tery_4817 PE=4 SV=1	Q10VG0	6	4	7	5	4	7
Response regulator receiver protein OS=Trichodesmium erythraeum (strain IMS101) GN=Tery_0717 PE=4 SV=1	Q118C4	3	3	3	4	1	2
Response regulator receiver protein OS=Trichodesmium erythraeum (strain IMS101) GN=Tery_1902 PE=4 SV=1	Q114B7	0	5	3	3	2	3
Response regulator receiver protein OS=Trichodesmium erythraeum (strain IMS101) GN=Tery_3248 PE=4 SV=1	Q10ZG2	8	9	8	11	7	10
Response regulator receiver protein OS=Trichodesmium erythraeum (strain IMS101) GN=Tery_3395 PE=4 SV=1	Q10Z28	0	0	0	0	0	0
Response regulator receiver protein OS=Trichodesmium erythraeum (strain IMS101) GN=Tery_3494 PE=4 SV=1	Q10YU0	14	18	15	13	13	15
Response regulator receiver protein OS=Trichodesmium erythraeum (strain IMS101) GN=Tery_3494 PE=4 SV=1	REVERSE_Q10YU0	1	0	0	0	0	0
Response regulator receiver protein OS=Trichodesmium erythraeum (strain IMS101) GN=Tery_4222 PE=4 SV=1	Q10X01	0	3	2	0	2	0
Response regulator receiver protein OS=Trichodesmium erythraeum (strain IMS101) GN=Tery_4223 PE=4 SV=1	Q10X00	4	0	2	2	2	0
RfaE bifunctional protein OS=Trichodesmium erythraeum (strain IMS101) GN=Tery_3495 PE=4 SV=1	Q10YT9	1	2	2	3	2	3
Rho termination factor-like OS=Trichodesmium erythraeum (strain IMS101) GN=Tery_0018 PE=4 SV=1	Q11AD2	8	8	8	8	4	7
Rho termination factor-like OS=Trichodesmium erythraeum (strain IMS101) GN=Tery_0149 PE=4 SV=1	Q11A30	41	42	40	49	28	41
Rhodanese-like OS=Trichodesmium erythraeum (strain IMS101) GN=Tery_0713 PE=4 SV=1	Q118C8	0	0	0	0	0	0
Rhodanese-like OS=Trichodesmium erythraeum (strain IMS101) GN=Tery_4532 PE=4 SV=1	Q10W62	33	38	46	35	29	34
Riboflavin biosynthesis protein RibBA OS=Trichodesmium erythraeum (strain IMS101) GN=ribBA PE=3 SV=1	Q10WC5	2	1	2	2	1	2
Riboflavin biosynthesis protein RibD OS=Trichodesmium erythraeum (strain IMS101) GN=Tery_1661 PE=3 SV=1	Q114Z2	0	0	0	1	0	1
Ribokinase OS=Trichodesmium erythraeum (strain IMS101) GN=rbsK PE=3 SV=1	Q117Q3	0	0	0	0	0	2
Ribonuclease 3 OS=Trichodesmium erythraeum (strain IMS101) GN=rnc PE=3 SV=1	Q113E6	0	0	0	0	0	0
Ribonuclease H OS=Trichodesmium erythraeum (strain IMS101) GN=rnhA PE=3 SV=1	Q115G0	0	0	0	0	0	0
Ribonuclease H OS=Trichodesmium erythraeum (strain IMS101) GN=Tery_4732 PE=4 SV=1	Q10VN1	11	11	12	9	5	11
Ribonuclease J OS=Trichodesmium erythraeum (strain IMS101) GN=rnj PE=3 SV=1	Q118P1	6	9	0	8	0	0
Ribonuclease PH OS=Trichodesmium erythraeum (strain IMS101) GN=rph PE=3 SV=1	Q113J5	12	13	15	8	8	13
Ribonuclease T2 OS=Trichodesmium erythraeum (strain IMS101) GN=Tery_3279 PE=3 SV=1	Q10ZD3	6	6	5	4	4	6
Ribonuclease, Rne/Rng family OS=Trichodesmium erythraeum (strain IMS101) GN=Tery_0483 PE=4 SV=1	Q118Y5	30	23	27	24	17	31
Ribose-5-phosphate isomerase A OS=Trichodesmium erythraeum (strain IMS101) GN=rpiA PE=3 SV=1	Q111U2	33	28	31	33	25	29
Ribose-phosphate pyrophosphokinase OS=Trichodesmium erythraeum (strain IMS101) GN=prs PE=3 SV=1	Q118N3	4	2	3	3	2	5
Ribosomal protein L11 methyltransferase OS=Trichodesmium erythraeum (strain IMS101) GN=prmA PE=3 SV=1	Q10X25	2	2	2	1	0	1
Ribosomal silencing factor RsfS OS=Trichodesmium erythraeum (strain IMS101) GN=rsfS PE=3 SV=1	Q10VW4	0	0	0	0	0	0
Ribosome maturation factor RimP OS=Trichodesmium erythraeum (strain IMS101) GN=rimP PE=3 SV=2	Q10XM0	0	0	0	0	0	1
Ribosome-binding ATPase YchF OS=Trichodesmium erythraeum (strain IMS101) GN=ychF PE=3 SV=1	Q116H3	31	28	32	31	18	32
Ribosome-binding factor A OS=Trichodesmium erythraeum (strain IMS101) GN=rbfA PE=3 SV=1	Q110L1	0	2	4	4	0	0
Ribosome-recycling factor OS=Trichodesmium erythraeum (strain IMS101) GN=frr PE=3 SV=1	Q10Y49	36	44	37	34	27	39
Ribulose 1,5-bisphosphate carboxylase small subunit OS=Trichodesmium erythraeum (strain IMS101) GN=Tery_1574 PE=4 SV=1	Q115H0	7	4	8	5	0	7
Ribulose 1,5-bisphosphate carboxylase small subunit OS=Trichodesmium erythraeum (strain IMS101) GN=Tery_4408 PE=4 SV=1	Q10WH8	137	110	120	135	86	96
Ribulose-phosphate 3-epimerase OS=Trichodesmium erythraeum (strain IMS101) GN=Tery_2606 PE=3 SV=1	Q111M3	7	6	7	6	4	7
RNA methyltransferase, TrmH family, group 3 OS=Trichodesmium erythraeum (strain IMS101) GN=Tery_2313 PE=3 SV=1	Q112N7	3	3	4	3	2	3
RNA polymerase sigma factor OS=Trichodesmium erythraeum (strain IMS101) GN=Tery_1956 PE=3 SV=1	Q113W5	0	0	0	0	0	0
RNA polymerase sigma factor SigA OS=Trichodesmium erythraeum (strain IMS101) GN=sigA PE=3 SV=1	Q10UV2	1	6	1	3	1	2
RNA polymerase, sigma 28 subunit OS=Trichodesmium erythraeum (strain IMS101) GN=Tery_4426 PE=3 SV=1	Q10WG0	3	0	0	1	0	0
RNA polymerase, sigma 28 subunit OS=Trichodesmium erythraeum (strain IMS101) GN=Tery_4426 PE=3 SV=1	REVERSE_Q10WG0	0	0	0	0	0	0
RNA polymerase, sigma-24 subunit, ECF subfamily OS=Trichodesmium erythraeum (strain IMS101) GN=Tery_0385 PE=3 SV=1	Q119H1	0	0	0	0	0	0
RNA-binding protein (Contains KH domain)-like OS=Trichodesmium erythraeum (strain IMS101) GN=Tery_2537 PE=4 SV=1	Q111T5	0	0	0	0	0	2
RNA-binding region RNP-1 OS=Trichodesmium erythraeum (strain IMS101) GN=Tery_1863 PE=4 SV=1	Q114F5	23	26	27	20	14	22
RNA-binding region RNP-1 OS=Trichodesmium erythraeum (strain IMS101) GN=Tery_4701 PE=4 SV=1	Q10VR0	58	63	68	63	38	62
RNA-binding region RNP-1 OS=Trichodesmium erythraeum (strain IMS101) GN=Tery_4702 PE=4 SV=1	Q10VQ9	96	104	103	113	70	100
RNA-binding S4 OS=Trichodesmium erythraeum (strain IMS101) GN=Tery_4198 PE=4 SV=1	Q10X22	7	2	6	6	5	3
RNAse R OS=Trichodesmium erythraeum (strain IMS101) GN=Tery_1511 PE=4 SV=1	Q115M8	34	41	39	27	20	35
Rod shape-determining protein MreB OS=Trichodesmium erythraeum (strain IMS101) GN=Tery_1150 PE=4 SV=1	Q116R2	12	10	9	5	8	12
ROK domain containing protein OS=Trichodesmium erythraeum (strain IMS101) GN=Tery_2875 PE=4 SV=1	Q110M6	3	4	2	3	0	3
RP ribonucleotide reductase-like OS=Trichodesmium erythraeum (strain IMS101) GN=Tery_0428 PE=4 SV=1	Q119D6	0	0	0	0	0	0
Rubredoxin OS=Trichodesmium erythraeum (strain IMS101) GN=Tery_3502 PE=3 SV=1	Q10YT2	8	5	8	6	4	5
S-(hydroxymethyl)glutathione dehydrogenase OS=Trichodesmium erythraeum (strain IMS101) GN=Tery_2840 PE=3 SV=1	Q110R0	5	5	5	6	4	0
S-adenosylmethionine synthase OS=Trichodesmium erythraeum (strain IMS101) GN=metK PE=3 SV=1	Q10VU5	58	57	64	57	31	62
S-adenosylmethionine:tRNA ribosyltransferase-isomerase OS=Trichodesmium erythraeum (strain IMS101) GN=queA PE=3 SV=1	Q118B2	0	0	2	0	0	0
S-formylglutathione hydrolase OS=Trichodesmium erythraeum (strain IMS101) GN=Tery_2838 PE=3 SV=1	Q110R2	0	0	1	0	0	0
S-layer-like region OS=Trichodesmium erythraeum (strain IMS101) GN=Tery_1054 PE=4 SV=1	Q116Z9	26	27	28	24	18	26
S-methyl-5'-thioadenosine phosphorylase OS=Trichodesmium erythraeum (strain IMS101) GN=mtnP PE=3 SV=1	Q10YC7	9	8	9	7	6	9
Saccharopine dehydrogenase OS=Trichodesmium erythraeum (strain IMS101) GN=Tery_4315 PE=4 SV=1	Q10WR4	0	0	0	0	0	0
Sec-independent protein translocase protein TatA OS=Trichodesmium erythraeum (strain IMS101) GN=tatA PE=3 SV=1	Q110N2	6	6	8	7	3	8
Sec-independent protein translocase protein TatC OS=Trichodesmium erythraeum (strain IMS101) GN=tatC PE=3 SV=1	Q114K5	0	0	1	0	0	0
Serine hydroxymethyltransferase OS=Trichodesmium erythraeum (strain IMS101) GN=glyA PE=3 SV=1	Q111H1	20	21	22	26	16	22
Serine O-acetyltransferase OS=Trichodesmium erythraeum (strain IMS101) GN=Tery_3017 PE=4 SV=1	Q110A2	0	2	0	0	0	2
Serine phosphatase OS=Trichodesmium erythraeum (strain IMS101) GN=Tery_5014 PE=4 SV=1	Q10UZ8	14	17	15	17	12	21
Serine phosphatase OS=Trichodesmium erythraeum (strain IMS101) GN=Tery_5014 PE=4 SV=1	REVERSE_Q10UZ8	0	0	0	0	0	0
Serine--glyoxylate transaminase OS=Trichodesmium erythraeum (strain IMS101) GN=Tery_3167 PE=3 SV=1	Q10ZM9	57	58	61	64	50	58
Serine--tRNA ligase OS=Trichodesmium erythraeum (strain IMS101) GN=serS PE=3 SV=1	Q10YR2	11	12	9	11	9	13
Serine/threonine protein kinase OS=Trichodesmium erythraeum (strain IMS101) GN=Tery_0247 PE=4 SV=1	Q119U1	0	0	0	2	0	0
Serine/threonine protein kinase OS=Trichodesmium erythraeum (strain IMS101) GN=Tery_1036 PE=4 SV=1	Q117B6	0	0	0	0	0	0
Serine/threonine protein kinase OS=Trichodesmium erythraeum (strain IMS101) GN=Tery_1668 PE=4 SV=1	Q114Y5	0	0	1	0	0	0
Serine/threonine protein kinase OS=Trichodesmium erythraeum (strain IMS101) GN=Tery_2829 PE=4 SV=1	Q110S1	0	0	0	2	0	0
Serine/threonine protein kinase OS=Trichodesmium erythraeum (strain IMS101) GN=Tery_2831 PE=4 SV=1	Q110R9	0	0	1	2	0	0
Serine/threonine protein kinase OS=Trichodesmium erythraeum (strain IMS101) GN=Tery_3400 PE=4 SV=1	Q10Z23	0	0	0	0	0	0
Serine/threonine protein kinase OS=Trichodesmium erythraeum (strain IMS101) GN=Tery_3510 PE=4 SV=1	Q10YS4	1	1	0	2	1	0
Serine/threonine protein kinase OS=Trichodesmium erythraeum (strain IMS101) GN=Tery_4351 PE=4 SV=1	Q10WN1	1	0	2	0	0	0
Serine/threonine protein kinase with WD40 repeats OS=Trichodesmium erythraeum (strain IMS101) GN=Tery_0184 PE=4 SV=1	REVERSE_Q119Z9	0	0	0	0	2	0
Serum albumin OS=Homo sapiens GN=ALB PE=1 SV=2	P02768	0	0	0	0	0	0
SH3, type 3 OS=Trichodesmium erythraeum (strain IMS101) GN=Tery_1844 PE=4 SV=1	Q114H4	0	0	0	0	0	0
SH3, type 3 OS=Trichodesmium erythraeum (strain IMS101) GN=Tery_4656 PE=4 SV=1	Q10VU9	0	0	0	0	0	0
Shikimate dehydrogenase (NADP(+)) OS=Trichodesmium erythraeum (strain IMS101) GN=aroE PE=3 SV=1	Q113A7	5	2	4	4	5	2
Shikimate kinase OS=Trichodesmium erythraeum (strain IMS101) GN=aroK PE=3 SV=1	Q115N2	2	3	0	0	1	2
Short-chain dehydrogenase/reductase SDR OS=Trichodesmium erythraeum (strain IMS101) GN=Tery_0205 PE=3 SV=1	Q119Y0	9	11	11	10	6	7
Short-chain dehydrogenase/reductase SDR OS=Trichodesmium erythraeum (strain IMS101) GN=Tery_0698 PE=4 SV=1	Q118E1	3	2	0	0	0	3
Short-chain dehydrogenase/reductase SDR OS=Trichodesmium erythraeum (strain IMS101) GN=Tery_1795 PE=3 SV=1	Q114M0	8	4	5	7	6	10
Short-chain dehydrogenase/reductase SDR OS=Trichodesmium erythraeum (strain IMS101) GN=Tery_2630 PE=4 SV=1	Q111J9	0	0	1	1	0	0
Short-chain dehydrogenase/reductase SDR OS=Trichodesmium erythraeum (strain IMS101) GN=Tery_2914 PE=4 SV=1	Q110J2	18	17	13	18	10	25
Short-chain dehydrogenase/reductase SDR OS=Trichodesmium erythraeum (strain IMS101) GN=Tery_3453 PE=3 SV=1	Q10YX9	0	0	0	0	0	0
Short-chain dehydrogenase/reductase SDR OS=Trichodesmium erythraeum (strain IMS101) GN=Tery_3927 PE=3 SV=1	Q10XR6	8	9	8	7	6	9
Sigma 54 modulation protein / SSU ribosomal protein S30P OS=Trichodesmium erythraeum (strain IMS101) GN=Tery_3183 PE=4 SV=1	Q10ZL6	11	11	11	8	9	11
Signal peptidase I OS=Trichodesmium erythraeum (strain IMS101) GN=Tery_1310 PE=3 SV=1	Q116D9	0	0	0	0	0	0
Signal peptidase I OS=Trichodesmium erythraeum (strain IMS101) GN=Tery_2178 PE=3 SV=1	Q113B5	6	6	6	6	5	5
Signal peptide peptidase A. Serine peptidase. MEROPS family S49 OS=Trichodesmium erythraeum (strain IMS101) GN=Tery_2494 PE=4 SV=1	Q111X3	15	8	15	8	9	18
Signal recognition particle protein OS=Trichodesmium erythraeum (strain IMS101) GN=ffh PE=3 SV=1	Q111T7	17	19	14	16	10	20
Signal recognition particle receptor FtsY OS=Trichodesmium erythraeum (strain IMS101) GN=ftsY PE=3 SV=1	Q118A5	12	13	17	12	9	14
Single-strand binding protein/Primosomal replication protein n OS=Trichodesmium erythraeum (strain IMS101) GN=Tery_3185 PE=4 SV=1	Q10ZL4	5	5	10	8	3	6
Single-stranded DNA-binding protein OS=Trichodesmium erythraeum (strain IMS101) GN=Tery_1149 PE=3 SV=1	Q116R3	7	6	8	3	4	12
Single-stranded nucleic acid binding R3H OS=Trichodesmium erythraeum (strain IMS101) GN=Tery_3015 PE=4 SV=1	Q110A4	3	2	2	1	0	3
Single-stranded nucleic acid binding R3H OS=Trichodesmium erythraeum (strain IMS101) GN=Tery_4711 PE=4 SV=1	Q10VQ0	1	2	1	0	0	2
SirA-like OS=Trichodesmium erythraeum (strain IMS101) GN=Tery_1752 PE=3 SV=1	Q114R2	2	3	3	2	0	2
Site-determining protein OS=Trichodesmium erythraeum (strain IMS101) GN=Tery_3383 PE=3 SV=1	Q10Z40	1	4	3	0	0	2
Small GTP-binding protein OS=Trichodesmium erythraeum (strain IMS101) GN=Tery_2771 PE=4 SV=1	Q110X0	0	0	0	0	0	0
Small GTP-binding protein OS=Trichodesmium erythraeum (strain IMS101) GN=Tery_3798 PE=4 SV=1	Q10Y31	0	0	0	0	0	0
SMP-30/Gluconolaconase/LRE-like region OS=Trichodesmium erythraeum (strain IMS101) GN=Tery_1771 PE=4 SV=1	Q114P3	0	0	0	0	0	1
Sodium/hydrogen exchanger OS=Trichodesmium erythraeum (strain IMS101) GN=Tery_0859 PE=3 SV=1	Q117Q7	0	0	0	0	0	1
Sodium/hydrogen exchanger OS=Trichodesmium erythraeum (strain IMS101) GN=Tery_1631 PE=4 SV=1	Q115B7	0	0	0	0	0	0
Spermidine/putrescine import ATP-binding protein PotA OS=Trichodesmium erythraeum (strain IMS101) GN=potA PE=3 SV=1	Q110U3	0	0	0	1	0	0
SPFH domain, Band 7 family protein OS=Trichodesmium erythraeum (strain IMS101) GN=Tery_1873 PE=4 SV=1	Q114E5	61	52	54	56	36	56
SPFH domain, Band 7 family protein OS=Trichodesmium erythraeum (strain IMS101) GN=Tery_1952 PE=4 SV=1	Q113W9	8	3	5	3	4	5
SPFH domain, Band 7 family protein OS=Trichodesmium erythraeum (strain IMS101) GN=Tery_4181 PE=4 SV=1	Q10X38	3	2	3	1	2	3
Squalene-hopene cyclase OS=Trichodesmium erythraeum (strain IMS101) GN=Tery_0727 PE=4 SV=1	Q118B5	9	10	10	9	9	12
SsrA-binding protein OS=Trichodesmium erythraeum (strain IMS101) GN=smpB PE=3 SV=1	Q112L2	0	0	1	0	1	0
SSU ribosomal protein S1P OS=Trichodesmium erythraeum (strain IMS101) GN=Tery_2502 PE=4 SV=1	Q111W5	33	35	33	32	17	36
SSU ribosomal protein S1P OS=Trichodesmium erythraeum (strain IMS101) GN=Tery_4663 PE=4 SV=1	Q10VU3	76	75	71	69	45	72
Stress protein OS=Trichodesmium erythraeum (strain IMS101) GN=Tery_0707 PE=4 SV=1	Q118D3	4	6	7	4	5	6
Stress protein OS=Trichodesmium erythraeum (strain IMS101) GN=Tery_5053 PE=4 SV=1	Q10UW4	11	6	12	8	6	7
Stress protein OS=Trichodesmium erythraeum (strain IMS101) GN=Tery_5062 PE=4 SV=1	Q10UV8	45	53	54	51	38	53
Stress responsive alpha-beta barrel OS=Trichodesmium erythraeum (strain IMS101) GN=Tery_0681 PE=4 SV=1	Q118F6	0	0	5	4	0	3
Substrate-binding region of ABC-type glycine betaine transport system OS=Trichodesmium erythraeum (strain IMS101) GN=Tery_1458 PE=4 SV=1	Q115S6	15	15	14	13	9	16
Substrate-binding region of ABC-type glycine betaine transport system OS=Trichodesmium erythraeum (strain IMS101) GN=Tery_1459 PE=4 SV=1	Q115S5	0	0	0	0	0	0
Succinate dehydrogenase iron-sulfur subunit OS=Trichodesmium erythraeum (strain IMS101) GN=Tery_3726 PE=3 SV=1	Q10Y92	0	0	0	0	0	1
Succinate dehydrogenase iron-sulfur subunit OS=Trichodesmium erythraeum (strain IMS101) GN=Tery_3726 PE=3 SV=1	REVERSE_Q10Y92	0	0	0	0	0	0
Succinate dehydrogenase subunit A OS=Trichodesmium erythraeum (strain IMS101) GN=Tery_2474 PE=4 SV=1	Q111Z1	0	0	0	0	0	0
Succinate dehydrogenase subunit C OS=Trichodesmium erythraeum (strain IMS101) GN=Tery_0453 PE=4 SV=1	Q119B2	0	0	0	0	0	0
Succinyl-CoA synthetase (ADP-forming) alpha subunit OS=Trichodesmium erythraeum (strain IMS101) GN=Tery_2751 PE=4 SV=1	Q110Z0	3	0	0	0	0	0
Succinyl-CoA synthetase (ADP-forming) beta subunit OS=Trichodesmium erythraeum (strain IMS101) GN=Tery_2750 PE=4 SV=1	Q110Z1	4	5	5	4	0	6
Succinylglutamate desuccinylase/aspartoacylase OS=Trichodesmium erythraeum (strain IMS101) GN=Tery_3439 PE=4 SV=1	Q10YZ2	10	8	8	9	3	11
Sugar fermentation stimulation protein homolog OS=Trichodesmium erythraeum (strain IMS101) GN=sfsA PE=3 SV=1	Q111B4	0	0	0	0	0	0
Sulfate adenylyltransferase OS=Trichodesmium erythraeum (strain IMS101) GN=sat PE=3 SV=1	Q111K4	27	33	32	31	16	27
Sulfite reductase (Ferredoxin) OS=Trichodesmium erythraeum (strain IMS101) GN=Tery_3544 PE=3 SV=1	Q10YP3	57	59	62	52	36	52
[truncated: 576 more rows]

## Sheet: Proteome t=24
Annotation	Uniprot ID	-P24A	-P24B	-P24C	RF24A	RF24B	RF24C
[truncated: 1,915 more rows]

[truncated: 9 more sheets: Proteome t=48, Proteome t=72, Proteome +P_v_-P24, Transcriptome t=0, Transcriptome t=4, Transcriptome t=24, Transcriptome t=48, Transcriptome t=72, Transcriptome +P_v_-P24]
